# Supplementary material for: Systematic review of prediction models for delirium in the older adult inpatient
Source: PubMed Central journal article supplement — BMJ Open. 2018 Apr 28;8(4):e019223. doi: 10.1136/bmjopen-2017-019223 (PMC5931306; doi:10.1136/bmjopen-2017-019223), 2018-04-28
Supplement: bmjopen-2017-019223.draft_revisions.pdf [file bmjopen-2017-019223.draft_revisions.pdf]

# BMJ Open

BMJ Open is committed to open peer review. As part of this commitment we make the peer review history of every article we publish publicly available.

When an article is published we post the peer reviewers' comments and the authors' responses online. We also post the versions of the paper that were used during peer review. These are the versions that the peer review comments apply to.

The versions of the paper that follow are the versions that were submitted during the peer review process. They are not the versions of record or the final published versions. They should not be cited or distributed as the published version of this manuscript.

BMJ Open is an open access journal and the full, final, typeset and author-corrected version of record of the manuscript is available on our site with no access controls, subscription charges or pay-per-view fees (<http://bmjopen.bmj.com>).

If you have any questions on BMJ Open's open peer review process please email [info.bmjopen@bmj.com](mailto:info.bmjopen@bmj.com)

# BMJ Open

## Systematic Review of Prediction Models for Delirium in the Older Adult Inpatient

|                                 |                                                                                                                                                                                                                                                                                                                                                                                                                                                                                                                                                                                                                                                                                                                                                                                                                                                                                                                                                                                                                                                                                                                            |
|---------------------------------|----------------------------------------------------------------------------------------------------------------------------------------------------------------------------------------------------------------------------------------------------------------------------------------------------------------------------------------------------------------------------------------------------------------------------------------------------------------------------------------------------------------------------------------------------------------------------------------------------------------------------------------------------------------------------------------------------------------------------------------------------------------------------------------------------------------------------------------------------------------------------------------------------------------------------------------------------------------------------------------------------------------------------------------------------------------------------------------------------------------------------|
| Journal:                        | <i>BMJ Open</i>                                                                                                                                                                                                                                                                                                                                                                                                                                                                                                                                                                                                                                                                                                                                                                                                                                                                                                                                                                                                                                                                                                            |
| Manuscript ID                   | bmjopen-2017-019223                                                                                                                                                                                                                                                                                                                                                                                                                                                                                                                                                                                                                                                                                                                                                                                                                                                                                                                                                                                                                                                                                                        |
| Article Type:                   | Research                                                                                                                                                                                                                                                                                                                                                                                                                                                                                                                                                                                                                                                                                                                                                                                                                                                                                                                                                                                                                                                                                                                   |
| Date Submitted by the Author:   | 18-Aug-2017                                                                                                                                                                                                                                                                                                                                                                                                                                                                                                                                                                                                                                                                                                                                                                                                                                                                                                                                                                                                                                                                                                                |
| Complete List of Authors:       | Lindroth, Heidi; University of Wisconsin Madison School of Medicine and Public Health, Department of Anesthesiology; University of Wisconsin Madison Graduate School, School of Nursing<br>Bratzke, Lisa; University of Wisconsin-Madison, School of Nursing<br>Purvis, Suzanne; University of Wisconsin Hospital and Clinics, Nursing<br>Brown, Roger; University of Wisconsin Madison, School of Nursing<br>Coburn, Mark; Uniklinik RWTH Aachen, Anaesthesiology<br>Mrkobrada, Marko; Western University, Medicine<br>Chan, MTV; The Chinese University of Hong Kong, Anesthesia and Intensive Care<br>Davis, Daniel; University College London, MRC Unit for Lifelong Health and Ageing ; University College London<br>Pandharipande, Pratik; Vanderbilt University School of Medicine<br>Carlsson, Cynthia; William S. Middleton Veteran's Administration Geriatric Research Education and Clinical Center (GRECC), GRECC; University of Wisconsin Madison School of Medicine and Public Health<br>Sanders, Robert; University of Wisconsin Madison School of Medicine and Public Health, Department of Anesthesiology |
| <b>Primary Subject Heading</b>: | Geriatric medicine                                                                                                                                                                                                                                                                                                                                                                                                                                                                                                                                                                                                                                                                                                                                                                                                                                                                                                                                                                                                                                                                                                         |
| Secondary Subject Heading:      | Neurology                                                                                                                                                                                                                                                                                                                                                                                                                                                                                                                                                                                                                                                                                                                                                                                                                                                                                                                                                                                                                                                                                                                  |
| Keywords:                       | Delirium, GERIATRIC MEDICINE, Statistic                                                                                                                                                                                                                                                                                                                                                                                                                                                                                                                                                                                                                                                                                                                                                                                                                                                                                                                                                                                                                                                                                    |
|                                 |                                                                                                                                                                                                                                                                                                                                                                                                                                                                                                                                                                                                                                                                                                                                                                                                                                                                                                                                                                                                                                                                                                                            |

SCHOLARONE™  
Manuscripts

## Systematic Review of Prediction Models for Delirium in the Older Adult Inpatient

Heidi Lindroth, Lisa Bratzke, Suzanne Purvis, Roger Brown, Mark Coburn, Marko Mrkobrada, Matthew TV Chan, Daniel Davis, Pratik Pandharipande, Cynthia M. Carlsson, Robert D. Sanders University of Wisconsin School of Medicine and Public Health, Department of Anesthesiology, School of Nursing, 600 Highland Avenue, Madison, WI 53792 Heidi Lindroth BSN PhD Candidate<sup>1</sup>

University of Wisconsin School of Nursing, 701 Highland Avenue, Madison, WI 53705 Lisa Bratzke PhD Assistant Professor<sup>2</sup>

University Hospital, 600 Highland Avenue, Madison, WI 53792 Suzanne Purvis DNP, Clinical Nurse Specialist<sup>3</sup>

University of Wisconsin School of Nursing, 701 Highland Avenue, Madison, WI 53705 Roger L. Brown PhD, Professor<sup>4</sup>

University Hospital RWTH Aachen, Department of Anesthesiology, Pauwelsstrasse 30, 52074 Aachen, Mark Coburn MD, Professor<sup>5</sup>

Western University, Schulich School of Medicine and Dentistry, 339 Windermere Road, Room B9-100, London ON N5X 3W6, Marko Mrkobrada MD Associate Professor<sup>6</sup>

The Chinese University of Hong Kong, Department of Anaesthesia and Intensive Care, 4/F Main Clinical Block and Trauma Center, Prince of Wales Hospital, Hong Kong Special Administrative Region, China, Matthew TV Chan, MB, BS, PhD, Professor<sup>7</sup>

MRC Unit for Lifelong Health and Ageing at UCL, 33 Bedford Place, London, WC1B 5JU, Daniel Davis PhD MRCP, Senior Clinical Researcher<sup>8</sup>

Vanderbilt University Medical Center, Department of Anesthesiology, 1211 Medical Center Drive, Nashville TN 37322, Pratik Pandharipande MD, Chief, Division of Anesthesiology Critical Care Medicine<sup>9</sup>

University of Wisconsin School of Medicine and Public Health, Madison VA Geriatric Research Education and Clinical Center (GRECC) (D4211), 2500 Overlook Terrace, Madison, WI, 53705, Cynthia M. Carlsson, MD, MS, Associate Professor of Medicine, Division of Geriatrics<sup>10</sup>

University of Wisconsin School of Medicine and Public Health, Department of Anesthesiology, 600 Highland Avenue, Madison, WI 53792, Robert D. Sanders MBBS PhD FRCA, Assistant Professor<sup>11</sup>

**+Corresponding author:** Heidi Lindroth, Department of Anesthesiology, University of Wisconsin School of Medicine and Public Health, 600 Highland Avenue, B6/319 CSC Madison, WI 53792-3272 Telephone: 608-262-6469 Fax: 608-263-0575 Madison, USA. Email: [hlindroth@wisc.edu](mailto:hlindroth@wisc.edu)

Word count: 4043

## Objective

To identify existing prognostic delirium prediction models and evaluate their validity and statistical methodology in the older adult ( $\geq 60$ yo) acute hospital population.

## Design

Systematic review

## Data Sources and methods

PubMed, CINAHL, PsychINFO, SocINFO, Cochrane, ISI and EMBASE were searched from 1990/1/1 to 2016/12/31. The PRISMA Statement guided protocol development. Inclusion criteria: Age  $\geq 60$ , inpatient, developed/validated a prognostic delirium prediction model. Exclusion criteria: alcohol-related delirium, sample size  $\leq 50$ . The primary performance measures were calibration and discrimination statistics. Two authors independently conducted search and extracted data. First author synthesized data. Mentoring author resolved disagreement.

## Eligibility Criteria

Inclusion criteria: Age  $\geq 60$ , inpatient, developing or validating an existing prognostic delirium prediction model. Exclusion criteria: alcohol-related delirium, sample size  $\leq 50$ . Data were extracted from published studies. The primary performance measures were calibration and discrimination statistics. Secondary measures included applied statistical methodology.

## Results

The initial search resulted in 7,502 studies. Following full-text review of 192 studies, 33 were excluded based on age criteria ( $< 60$ yo) and 27 met the defined criteria. Twenty-three delirium prediction models were identified, thirteen were externally validated and three were internally validated. The following populations were represented: 11-medical, 3-medical/surgical, and 13-

1  
2  
3 surgical. The assessment of delirium was often non-systematic resulting in varied incidence. Five  
4  
5 models demonstrated an AUROC >0.75, indicating moderate predictive ability. Limitations in  
6  
7 design, data collection methods, and calibration statistics were identified.  
8  
9

## 10 **Conclusions**

11  
12 Delirium prediction models for older adults show variable and typically inadequate predictive  
13  
14 capabilities. Our review highlights the need for development of robust models to predict  
15  
16 delirium in older inpatients. We provide recommendations for the development of such models.  
17  
18

## 19 **Funding**

20  
21 Department of Anesthesiology, University of Wisconsin-Madison.  
22

23  
24 R01 NHLBI (HL111111) and research grant from Hospira Inc., NIH collaboration  
25

26  
27 All authors completed ICMJE disclosure forms and no conflicts of interest declared.  
28

## 29 **Keywords**

30  
31 Delirium. Aging. Cognition. Prediction. Statistical Models.  
32

## 33 **Strengths and Limitations of this Study**

- 34 • The PRISMA Statement and CHARMS checklist were used to develop the protocol for  
35 this systematic review.
- 36 • Interprofessional authorship providing different perspectives on delirium prediction  
37 models.
- 38 • Comprehensive search using multiple databases and search terms
- 39 • Limited by age ( $\geq 60$ yo)
- 40 • Limited to studies developing or validating predictive models, did not include predictive  
41 risk factors  
42  
43  
44  
45  
46  
47  
48  
49  
50  
51  
52  
53  
54  
55  
56  
57  
58  
59  
60

## INTRODUCTION

Delirium is an acute disturbance of consciousness and cognition precipitated by an acute event such as sudden illness, infection, or surgery. This syndrome is a serious public health concern, as up to 50% of hospitalised older adults will experience delirium in medical and surgical populations.<sup>1-3</sup> Delirium has been independently associated with increased mortality, morbidity in terms of impaired cognition and functional disability along with an estimated annual expenditure of \$164 billion.<sup>4-9</sup> Prediction models allow clinicians to forecast which individuals are at a higher risk for the development of a particular disease process and target specific interventions at the identified risk profile.<sup>10-13</sup> At present, an extensive list of modifiable and non-modifiable, predisposing, and precipitating delirium risk factors encumbers clinicians, hindering the ability to select the most important or contributing risk factor.<sup>1 14</sup> An accurate and timely delirium prediction model would formalize the highest impact risk factors into a powerful tool, facilitating early implementation of prevention measures.<sup>11</sup>

This systematic review expands on previous published reviews on delirium prediction models by integrating both medical and surgical populations while examining statistical aspects of each study including reporting metrics and includes recently published models. Our aim was to provide important recommendations on study design for future delirium prediction models while integrating knowledge gained from the study of both medical and surgical populations. We conducted a systematic review of the literature focusing on the identification and subsequent validity of existing prognostic delirium prediction models in the older adult ( $\geq 60$  years old) acute hospital population.

## METHODS

This systematic review followed the protocol developed from the PRISMA Statement and the CHARMS checklist (Appendix A).<sup>15 16</sup> A delirium prediction model was defined as a statistical model that either stratified individuals for their level of delirium risk, or assigned a risk score to an individual based on the number and/or weighted value of predetermined modifiable and non-modifiable risk factors of delirium present. This review included studies focused on 1) older adult ( $\geq 60$  years) population, (the U.S. CDC and UN define an older adult as 60 years of age and older)<sup>17 18</sup>, 2) inpatient hospital setting, 3) publication dates of 1990/1/1 to 2016/12/31, and 4) developed and/or validated delirium prediction models. Studies were excluded if they 1) studied a different patient population (i.e. emergency department, skilled nursing facilities, palliative care, and hospice) as these are not generalizable to an inpatient hospital setting, 2) related to alcohol withdrawal, or delirium tremens, as the presence of alcohol withdrawal complicates delirium assessment, and 3) had a sample size  $\leq 50$  for methodological reasons (i.e. underpowered). All study designs were included. Studies were not limited by timeframe of delirium development (prevalent vs incident), however, only prognostic statistics were discussed. The search terms were as follows: (“Delirium” OR “postoperative delirium” OR “ICU delirium” OR “ICU psychosis” OR “ICU syndrome” OR “acute confusional state” OR “acute brain dysfunction”) AND (“inpatient” OR “hospital\*” OR “postoperative” OR surg\* OR “critical care unit” OR “intensive care unit” OR CCU OR ICU) AND (“predict\*” model OR risk\*). Electronic databases of PubMed, CINAHL, PsychINFO, Cochrane Database of Systematic Reviews, SocINDEX, ISI, and EMBASE were searched. Studies using a language other than English were included if translation was available through the University of Wisconsin-Madison Health Sciences Librarian. Bibliographies of identified studies were hand-

1  
2  
3 searched for additional references. Study quality was assessed through the Newcastle-Ottawa  
4 Scale (NOS)<sup>19</sup> for case-control and cohort studies. Two authors (HL, SP) independently  
5 performed data collection, data extraction, and assessed study quality, with any disagreement  
6 resolved by RDS.  
7  
8  
9

10  
11 Data extracted included: 1) study characteristics (study design, population, sample size), 2)  
12 outcome measure (method of identification and diagnosis, frequency, and length of screening),  
13 3) model performance information including the diagnostic accuracy of the delirium prediction  
14 models, calibration metrics, and events per variable 4) characteristics of the models (variables  
15 used in model, scoring/stratification system), 5) cognitive measures used in the study and 6)  
16 statistical methods applied for analysis. Five authors were contacted for missing or incomplete  
17 data. Four responses were received.  
18  
19  
20  
21  
22  
23  
24  
25  
26  
27

## 28 **Statistics**

29  
30 Model performance was assessed through calibration and classification metrics.<sup>15</sup> The AUROC  
31 was the primary measure collected to evaluate the discriminatory ability of the delirium  
32 prediction models. We chose to designate delirium prediction models with an AUROC greater  
33 than 0.75, albeit arbitrary, as clinically relevant.<sup>20</sup> Sensitivity, specificity, positive predictive  
34 values and negative predictive values were also collected from each delirium prediction model.  
35 Goodness-of-fit statistics including Chi-square ( $X^2$ ) and Hosmer-Lemeshow tests were collected  
36 to evaluate effective model calibration. Studies were also assessed for the inclusion of calibration  
37 plots and slopes. Model calibration refers to the agreement between observed outcomes and  
38 predictions.<sup>21</sup> Secondary pre-planned outcome measures included cognitive assessments, and  
39 predictive variable use per model.  
40  
41  
42  
43  
44  
45  
46  
47  
48  
49  
50  
51  
52

## 53 **Role of the Funding Source**



1  
2  
3 The funding sources named has no role in this study. All authors had full access to all the data in  
4 the study and shared responsibility for the decision to submit the publication.  
5  
6

## 7 8 **RESULTS**

9  
10 Twenty-seven studies were identified for inclusion.<sup>22-46</sup> The initial search resulted in 7,502  
11 citations, with 192 studies chosen for full-text review as detailed in the PRISMA diagram  
12 (Figure 1). We did not identify any relevant, unpublished studies for this review. Two studies  
13 that included younger populations in the development cohort for the delirium prediction model  
14 were included due to the subsequent older external validation cohort thus meeting our inclusion  
15 criteria (age  $\geq 60$ ).<sup>24 39</sup>  
16  
17

18  
19 Twenty-three delirium prediction models were developed, thirteen were externally validated<sup>22 26</sup>  
20 and three were internally validated.<sup>23 36 41</sup> Prospective cohort design was used in  
21 23 studies.<sup>22 24-30 32-34 36-48</sup> Retrospective design was used in four studies.<sup>23 31 35 43</sup> Eleven studies  
22 focused on the medical population<sup>22 24 28-32 39 41 44 48</sup>, three included medical and surgical<sup>23 42 43</sup>  
23 and thirteen recruited a surgical population (seven-orthopaedic<sup>25-27 33 37 40 47</sup>, one-cardiac<sup>45</sup>, two-  
24 noncardiac<sup>36 46</sup>, one general surgery<sup>34</sup>, two-oncological<sup>35 38</sup>). Data collection occurred upon  
25 admission in seventeen studies<sup>22 24 26 28-30 32-34 39-44 47 48</sup>, participants were approached within  
26 forty-eight hours of admission. Seven studies collected data pre-operatively then followed  
27 participants post-operatively.<sup>25 27 36-38 45 46</sup> The average NOS quality ranking for included cohort  
28 studies was seven; five studies received the maximum of nine stars. Further characteristics of  
29 studies are listed in Table 1.  
30  
31  
32  
33  
34  
35  
36  
37  
38  
39  
40  
41  
42  
43  
44  
45  
46  
47  
48  
49  
50  
51  
52  
53  
54  
55  
56  
57  
58  
59  
60

| <b>Table 1</b>                              |                                                              |                                          |                                                                             |                                                          |                                                                |
|---------------------------------------------|--------------------------------------------------------------|------------------------------------------|-----------------------------------------------------------------------------|----------------------------------------------------------|----------------------------------------------------------------|
| <b>Author</b>                               | <b>Study Design<br/>Population<br/>Sample Size</b>           | <b>Study Grade<br/>(NOS)</b>             | <b>Outcome Variable &amp;<br/>Rate (%)</b>                                  | <b>Delirium<br/>measurement &amp;<br/>frequency</b>      | <b>DPM Design &amp; (Name)</b>                                 |
| Carrasco et al. (2014) <sup>22</sup>        | P.Cohort<br>Medical<br>Dev: 374<br>Val: 104                  | S: ****<br>C: -<br>O: **<br>T: 6 stars   | Delirium<br>Dev: 25 (.06)<br>Val: 12 (12)                                   | CAM<br>Every 48 h                                        | Predictive Risk Score                                          |
| de Wit et al. (2016) <sup>23</sup>          | Retro<br>All hospital patients<br>Dev: 1291                  | S: ***<br>C: **<br>O: ***<br>T: 8 stars  | Delirium<br>Dev: 225(17)                                                    | Chart abstraction<br>EHR "diagnosis table"               | Automated Delirium<br>Prediction Model                         |
| Douglas et al.** (2013) <sup>24</sup>       | P.Cohort<br>Medical<br>Dev: 209<br>Val: 165                  | S: ****<br>C: -<br>O: ***<br>T: 7 stars  | Delirium<br>Dev: 25(12)<br>Val: 14(8.5)                                     | CAM-S & CAM<br>Daily                                     | Risk Stratification model<br>(AWOL)                            |
| Dworkin et al. (2016) <sup>46</sup>         | P.Cohort<br>Elective noncardiac<br>surg<br>Dev: 76           | S: ****<br>C: -<br>O: **<br>T: 6 stars   | Delirium<br>Dev: 10(13)                                                     | CAM or<br>FAM-CAM<br>1xafter surgery                     | Mini-Cog<br>Stratified into a five point<br>score              |
| Fisher and Flowerdew (1995) <sup>25</sup>   | P.Cohort<br>Elective Orthopedic<br>Dev: 80                   | S: **<br>C: -<br>O: **<br>T: 4 stars     | Delirium<br>Dev: 14(17.5)                                                   | CAM<br>2xDaily                                           | Prediction Model using<br>two variables.                       |
| Freter et al. (2005) <sup>27</sup>          | P.Cohort<br>Elective Hip surgery<br>Dev: 132                 | S: **<br>C: **<br>O: **<br>T: 6 stars    | Delirium<br>Dev: 18(14)                                                     | CAM<br>Daily                                             | Risk Stratification Model<br>(DEAR)                            |
| Freter et al. (2005) <sup>47</sup>          | P.Cohort<br>Hip Fx<br>Dev: 100                               | S: **<br>C: **<br>O: **<br>T: 6 stars    | Delirium<br>Dev: 24(24)                                                     | CAM<br>Daily                                             | Risk Stratification Model<br>(DEAR)                            |
| Freter et al. (2015) <sup>26</sup>          | P.Cohort<br>Hip Fracture<br>Val: 283                         | S: ***<br>C: -<br>O: **<br>T: 5 stars    | Delirium<br>Val: 119(42)                                                    | CAM<br>POD1, 3 & 5                                       | Risk stratification model<br>(DEAR)                            |
| Inouye and Charpentier (1996) <sup>28</sup> | P.Cohort<br>Medical<br>Dev: 196<br>Val: 312                  | S: ****<br>C: **<br>O: ***<br>T: 9 stars | Delirium<br>Dev: 35(18)<br>Val: 47(15)                                      | CAM<br>Every other day                                   | Risk stratification model<br>based on precipitating<br>factors |
| Inouye et al. (2007) <sup>30</sup>          | P.Cohort<br>Medical<br>Dev: 491<br>Val: 461                  | S: ****<br>C: **<br>O: ***<br>T: 9 stars | Delirium/ subsyndrome<br>delirium at discharge<br>Dev: 58(12)<br>Val: 28(6) | CAM<br>Every other day                                   | Risk stratification model                                      |
| Inouye et la. (1993) <sup>29</sup>          | P.Cohort<br>Medical<br>Dev: 107<br>Val: 174                  | S: ****<br>C: **<br>O: ***<br>T: 9 stars | Delirium<br>Dev: 27(25)<br>Val: 29(17)                                      | CAM<br>Daily                                             | Risk stratification model                                      |
| Ispandiaty et al. (2012) <sup>31</sup>      | Retro<br>Medical<br>Dev: 457                                 | S: **<br>C: -<br>O: ***<br>T: 5 Stars    | Delirium<br>Dev: 87(19)                                                     | Undefined<br>Daily                                       | Risk<br>stratification model                                   |
| Kalisvaart et al. (2006) <sup>33</sup>      | P.Cohort<br>Hip Surgery &<br>Fracture<br>Val: 603            | S: ***<br>C: -<br>O: ***<br>T: 6 stars   | Delirium<br>Dev: 74(12)                                                     | CAM, DRS-98<br>Daily through POD5                        | Externally validated<br>Inouye's '93 model.                    |
| Kim et al. (2016) <sup>34</sup>             | P.Cohort<br>Major General<br>Surgery<br>Dev: 561<br>Val: 533 | S: ***<br>C: **<br>O: ***<br>T: 8 stars  | Delirium<br>Dev: 112(20)<br>Val: 99(18)                                     | Nu-Desc<br>-every shift by RNs<br>Confirmed with<br>CAM. | Risk stratification model                                      |
| Korc-Grodzicki et al. (2014) <sup>35</sup>  | Retro<br>Oncological Surgery<br>Dev: 416                     | S: ***<br>C: -<br>O: ***<br>T: 6 stars   | Delirium<br>Dev: 79(19)                                                     | CAM<br>Daily                                             | Comprehensive Geriatric<br>Assessment (CGA) as<br>model.       |
| Leung et al. (2013) <sup>36</sup>           | P.Cohort<br>Noncardiac surgery<br>Dev: 581                   | S: ***<br>C: -<br>O: **<br>T: 5 stars    | Delirium<br>Dev: 234(40)                                                    | CAM<br>Daily                                             | Risk stratification model                                      |

|                                            |                                                                     |                                          |                                            |                                                                  |                                                               |
|--------------------------------------------|---------------------------------------------------------------------|------------------------------------------|--------------------------------------------|------------------------------------------------------------------|---------------------------------------------------------------|
| Liang et al. (2015) <sup>37</sup>          | P.Cohort<br>Elective Orthopedic<br>Surgery<br>Dev: 461              | S: ***<br>C: **<br>O: **<br>T: 7 stars   | Delirium<br>Dev: 37(8)                     | CAM<br>Daily<br>Confirmed by<br>psychologist<br>DSM-IV           | Built 2 DPMs<br>CGA<br>Risk stratification models             |
| Maekawa et al. (2015) <sup>38</sup>        | P.Cohort<br>Oncological;<br>Gastrointestinal<br>Surgery<br>Dev: 517 | S: **<br>C: *<br>O: ***<br>T: 6 stars    | Delirium<br>Dev: 124(24)                   | CAM<br>Unknown frequency                                         | Comprehensive Geriatric<br>Assessment (CGA) as<br>model.      |
| Martinez et al.(2012) <sup>39**</sup>      | P.Cohort<br>Medical<br>Dev: 397<br>Val: 302                         | S: ***<br>C: -<br>O: **<br>T: 5 stars    | Delirium<br>Dev: 52(13)<br>Val: 76(25)     | CAM<br>Undefined                                                 | Clinical prediction rule                                      |
| Moerman et al. (2012) <sup>40</sup>        | P.Cohort<br>Hip Fracture<br>Val: 378                                | S: ***<br>C: -<br>O: ***<br>T: 6 stars   | Delirium<br>Val: 102(27)                   | Ward RN<br>observation, 3xdaily<br>Confirmed by chart<br>review. | Risk stratification model<br>(Risk Model for Delirium,<br>RD) |
| O'Keeffe and Lavan<br>(1996) <sup>41</sup> | P.Cohort<br>Acute Geriatric Unit<br>Dev: 100<br>Ival: 84            | S: ****<br>C: -<br>O: **<br>T: 6 stars   | Delirium<br>Dev: 28(28)<br>IVal: 25(30)    | DAS<br>Every 48 hours<br><br>DSM III                             | Risk Stratification model                                     |
| Pendlebury et al. (2016) <sup>48</sup>     | P. Cohort<br>Medical<br>Dev: 308                                    | S: ****<br>C: *<br>O: ***<br>T: 8 stars  | Delirium<br>Dev: 95(31)                    | CAM<br>Every 48-hours<br><br>Confirmed by DSM-<br>IV interview   | Susceptibility Score                                          |
| Pendlebury et al. (2016) <sup>32</sup>     | P.Cohort<br>Medical<br>Val: 308                                     | S: ****<br>C: -<br>O: ***<br>T: 7 stars  | Delirium<br>Val: 95(31)                    | CAM<br>Every 48-hours<br><br>Confirmed by DSM-<br>IV interview   | Externally validated 4<br>DPMs                                |
| Pompei et al. (1994) <sup>42</sup>         | P.Cohort<br>Med/surg<br>Dev: 432<br>V: 323                          | S: ****<br>C: **<br>O: ***<br>T: 9 stars | Delirium<br>Dev: 64(14.8)<br>Val: 86(26.3) | CAM<br>2xweekly.<br>Confirmed with DSM<br>III                    | Risk stratification model                                     |
| Rudolph et al. (2009) <sup>45</sup>        | P.Cohort<br>Cardiac Surgery<br>Dev: 122<br>V: 109                   | S: ***<br>C: *<br>O: **<br>T: 6 stars    | Delirium<br>Dev: 63(52)<br>Val: 48(44)     | CAM, MDAS, DSI<br>Daily                                          | Risk stratification model                                     |
| Rudolph et al. (2011) <sup>44</sup>        | P.Cohort<br>Medical<br>V: 100                                       | S: ****<br>C: -<br>O: ***<br>T: 7 stars  | Delirium<br>Dev: 23(23)                    | DSM-IV<br>Daily clinical<br>interview                            | Externally validated<br>Inouye's '93 model.                   |
| Rudolph et al. (2016) <sup>43</sup>        | Dev: Retro<br>Val: P.Cohort<br>Med/surg<br>Dev: 27625<br>Val: 246   | S: ****<br>C: -<br>O: **<br>T: 6 stars   | Delirium<br>Dev: 2343(8)<br>Val: 64(26)    | Dev: Chart audit<br>Val: DSM-IV<br>Daily clinical<br>interview   | Risk stratification model                                     |

**Key:**

\*\*=Models developed in population  $\leq 60$  years of age, but validated in population  $\geq 60$  years of age.

**Study Design:** P.Cohort=Prospective Cohort, Retro=Retrospective design. Dev=Development, Val=Validation. Med=Medical, Surg=Surgical.

**Study Grade:** NOS=Newcastle Ottawa Scale. S=Selection, C=Comparability, O=Ottawa. Max 9 stars.

**Outcome Variable:** Dev=Development, Val=Validation

**Delirium Measurement:** CAM=Confusion Assessment Method, DSM=Diagnostic Statistical Manual, POD=Postoperative Day, MDAS=Memorial Delirium Assessment Scale, Nu-Desc=Nursing Delirium Screening Scale, DRS-98=Delirium Rating Scale, EHR=Electronic Health Record

**Type of Model:** How authors designed their delirium prediction model (DPM)

-Risk stratification model: Points (weighted or un-weighted) assigned per predictive risk factor present.

-CGA=Comprehensive Geriatric Assessment

## Delirium assessment

The outcome variable was measured using the Confusion Assessment Method in twenty-one studies.<sup>22 24-30 32-39 42 45-48</sup> The frequency of delirium assessment varied from two or more assessments daily (three studies)<sup>25 34 40</sup>, to once daily (twelve studies)<sup>24 27 29 31 33 35-37 43-45 47</sup>, every-other day (eight studies)<sup>22 26 28 30 32 41 42 48</sup>, once following surgery<sup>46</sup>, and undefined (three studies).<sup>23 38 39</sup> Of the studies that assessed delirium twice or more daily, all of these studies relied on ward nurse observations or telephone interview with the nurse to identify delirium symptoms.<sup>25 34 40</sup> The principal investigator confirmed the presence of delirium following the nurse report of symptoms.<sup>25 34</sup> Twenty-one studies used trained research or clinical personnel to conduct the delirium assessments.<sup>22 24-26 28-30 32-39 42-46 48</sup> Three studies relied on delirium diagnosis, or keywords designated as representing delirium, to identify the outcome measure through retrospective chart review.<sup>23 31 43</sup> Three studies relied on clinical staff to recognize and chart delirium symptoms.<sup>27 40 47</sup> One of these studies retrospectively confirmed the diagnosis of delirium through consensus review of two authors, disagreement was resolved by a psychiatrist.<sup>40</sup> One study did not report details on personnel performing delirium assessments.<sup>41</sup>

## Model design and statistical methods

Various statistical techniques were employed by the thirteen externally validated delirium prediction models in the selection of variables for model inclusion. Five used univariate or bivariate analyses and selected variables with a pre-determined statistical value (range for  $p < 0.05$  to  $p < 0.25$ ) for inclusion in the model.<sup>22 24 39 42 45</sup> One of these models paired bivariate analyses with a bootstrapping technique to address lower sample and event size.<sup>45</sup> Three models based their variable selection from a literature review of risk factors for delirium.<sup>26 27 40 43 47</sup> Two used proportional hazards regression modeling paired with bivariate analyses and included variables

1  
2  
3 with either a  $p$ -value  $<0.25$ <sup>31</sup> or a relative risk of  $\geq 1.5$ .<sup>29</sup> Five studies published their power  
4 analysis.<sup>24 32 34 39 45</sup> To further refine and test the estimated models, the following methods were  
5 employed: seven studies-stepwise logistic regression (LR),<sup>22 24 29 34 39 42 45</sup>, four studies-  
6 multivariate LR<sup>26 31 33 40</sup>, one study-continuation ratio model combined with log-binomial  
7 regression model<sup>30</sup>, one study-multivariable binomial regression.<sup>28</sup>

## 14 Variables

15  
16  
17 Figure two demonstrates the frequency of variable use in the thirteen externally validated  
18 delirium prediction models. Baseline cognitive impairment was the most frequently used  
19 variable. Five models defined baseline cognitive impairment as a cognitive test score at or below  
20 the level of dementia.<sup>26 29 33 42</sup> This cognitive test was administered upon study enrollment. One  
21 study additionally evaluated chronic cognitive impairment through family or caregiver interview  
22 with the modified Blessed Dementia Rating Scale (mBDRS).<sup>29 30</sup> Four models combined the  
23 cognitive test score derived upon enrollment with a history of dementia to define baseline  
24 cognitive impairment.<sup>30 32 40 43</sup> History of dementia was defined as follows: Two studies-family  
25 or caregiver report supplemented with documented history in medical record<sup>32 40</sup>, one study-  
26 medical record review and interview with mBDRS<sup>30</sup>, and one study-dementia billing codes or  
27 prescription information.<sup>43</sup> One study defined baseline cognitive impairment as a pre-specified  
28 key term in the electronic health.<sup>44</sup>

29  
30  
31 Functional impairment was defined as follows: (1) needing assistance with any basic ADL,<sup>26</sup> (1)  
32 domestic help, help with meals or physical care<sup>40</sup> and (2) residence in nursing facility or at home  
33 with caregivers.<sup>32</sup> Two studies used validated functional assessment tools (iADL and Barthel  
34 Index) and evaluated functional status two weeks prior to hospitalization.<sup>22 30</sup>

35  
36  
37 Externally validated delirium prediction models are detailed in Table 2.

**Table 2**

| External Validated DPM Name                     | Citation                               | Delirium #(% )                                                                              | Sens Spec PPV NPV (external)                                                                                                                    | AUROC (95%CI)                                                                                                                                           | Model Components                                                                                                                                                                                                                                                               | Cog. Assess Tool & Cutoff |
|-------------------------------------------------|----------------------------------------|---------------------------------------------------------------------------------------------|-------------------------------------------------------------------------------------------------------------------------------------------------|---------------------------------------------------------------------------------------------------------------------------------------------------------|--------------------------------------------------------------------------------------------------------------------------------------------------------------------------------------------------------------------------------------------------------------------------------|---------------------------|
| <b>AWOL Tool</b>                                | Pendlebury et al. (2016) <sup>34</sup> | 1st Val: 14(9)<br>2 <sup>nd</sup> Val: 95(31) (any delirium)<br>67-prevalent<br>28-incident | Mod. AWOL Cutoff - 3<br>Any Delirium<br>Sens .7<br>Spec .66<br>PPV .55<br>NPV .79<br>Incident Del<br>Sens .76<br>Spec .66<br>PPV .27<br>NPV .94 | 1 <sup>st</sup> Val: 0.69 (0.54-0.83)<br>Incident delirium<br>2 <sup>nd</sup> Val: Cohort 1 (MMSE) 0.78 (0.68-0.88)<br>Cohort 2 (AMTS) 0.73 (0.63-0.83) | Original AWOL Tool<br>Age >80 1 pt<br>Failure to spell WORLD backwards 1 pt<br>Disorientation 1 pt<br>Illness Severity 1 pt<br><br>Modified AWOL Tool<br>Age >80 1 pt<br>Diag of Dementia 1 pt<br>MMSE<24, AMTS<9 1 pt<br>Illness severity 1 pt                                | MMSE < 24<br>AMTS < 9     |
| <b>Clinical Prediction Rule-Cardiac Surgery</b> | Rudolph et al. (2009) <sup>47</sup>    | Dev: 63(52)<br>Val: 48(44)<br><br>(incident delirium)                                       | Not reported                                                                                                                                    | Dev: 0.74<br>Val: 0.75<br><br>Did not report CI                                                                                                         | Weighted Points-Regression<br>MMSE ≤ 23 2 pt<br>MMSE 24-27 1 pt<br>Hx of Stroke/TIA 1 pt<br>GDS >4 1 pt<br>Abnormal Albumin 1 pt<br>Stratified into point categories<br>0 pt<br>1 pt<br>2 pts<br>≥ 3 pts                                                                       | MMSE -Stratified score    |
| <b>DEAR</b>                                     | Freter et al. (2015) <sup>28</sup>     | Dev: (2005) 18(14)<br><br>Val: (2015) Pre-Op= 163(58)<br><br>Post-op= 118(42)               | Sens .68<br>Spec .73<br>PPV .65<br>NPV .76<br>Optimal cut-off score: 3pts<br><br>(Incident post-op delirium)                                    | Dev: (2005) 0.77 (0.64-0.87)<br><br>Val: (2015) AUROC Not published                                                                                     | MMSE ≤ 23 1 pt<br>Functional dependence 1 pt<br>Sensory impairment 1 pt<br>Substance use 1 pt<br>Age >80 1 pt<br>Not weighted.<br>0-5 Score, cut-off of 2 or 3 indicating high risk.                                                                                           | MMSE Cut-off ≤ 23         |
| <b>Delirium at Discharge Prediction Model</b>   | Inouye et al. (2007) <sup>32</sup>     | Dev: 58(12)<br>Val: 28(6)<br><br>(incident delirium)                                        | Not reported                                                                                                                                    | Dev: 0.80<br>Val: 0.75<br><br>Did not report CI                                                                                                         | Delirium at Discharge Prediction<br>Dementia diagnosis or mBDRS≥4 1 pt<br>Vision Impairment 1 pt<br>ADL Impairment 1 pt<br>Charlson Score 1 pt<br>Restraint use during delirium 1 pt<br>Not weighted.<br>0-1 pt = Low Risk<br>2-3 pt = Intermediate Risk<br>4-5 pt = High Risk | MMSE < 24<br>mBDR ≥ 4     |
| <b>Delirium Prediction Score (DPS)</b>          | Carrasco et al. (2014) <sup>24</sup>   | Dev: 25(.06)<br>Val: 12(12)                                                                 | Sens .88<br>Spec .74<br>PPV .22                                                                                                                 | Dev: 0.86 (0.82-0.91)                                                                                                                                   | DPS=[5xBUN/Cr ratio]-(3xBarthel Index).<br>Cut off is:<br>> -240 = High risk for Delirium                                                                                                                                                                                      | None.<br><br>Pfeffer      |

|                                                             |                                           | (incident delirium)                                    | NPV .99                                                                                                                                                                                                                                                                                                                                                                                                                                                                                                                                                         | Val: 0.78<br>(0.66-0.90)                               | In conventional units, cut-off is:<br>> -160 = High Risk for Delirium                                                                                                                                                                                                                                                                                                                                                                                                                                                                                                                                                                                                                                                                                                                                                                                                                                                                                                                                                                                                                                                                                                                       | Functional Activities Questionnaire as a proxy for prior dementia |      |                   |             |                                                             |      |                   |          |                                                                 |             |                 |      |              |      |            |             |      |      |             |                                                                                                                                                                                                                                                                                                                                                                                                                                                                                                                                                           |                    |  |            |      |                                 |   |                     |      |            |      |           |      |                   |      |        |      |                |      |                                                                                                                                                                                              |  |    |   |     |   |               |  |    |   |     |   |                    |  |     |   |     |   |                                                                   |
|-------------------------------------------------------------|-------------------------------------------|--------------------------------------------------------|-----------------------------------------------------------------------------------------------------------------------------------------------------------------------------------------------------------------------------------------------------------------------------------------------------------------------------------------------------------------------------------------------------------------------------------------------------------------------------------------------------------------------------------------------------------------|--------------------------------------------------------|---------------------------------------------------------------------------------------------------------------------------------------------------------------------------------------------------------------------------------------------------------------------------------------------------------------------------------------------------------------------------------------------------------------------------------------------------------------------------------------------------------------------------------------------------------------------------------------------------------------------------------------------------------------------------------------------------------------------------------------------------------------------------------------------------------------------------------------------------------------------------------------------------------------------------------------------------------------------------------------------------------------------------------------------------------------------------------------------------------------------------------------------------------------------------------------------|-------------------------------------------------------------------|------|-------------------|-------------|-------------------------------------------------------------|------|-------------------|----------|-----------------------------------------------------------------|-------------|-----------------|------|--------------|------|------------|-------------|------|------|-------------|-----------------------------------------------------------------------------------------------------------------------------------------------------------------------------------------------------------------------------------------------------------------------------------------------------------------------------------------------------------------------------------------------------------------------------------------------------------------------------------------------------------------------------------------------------------|--------------------|--|------------|------|---------------------------------|---|---------------------|------|------------|------|-----------|------|-------------------|------|--------|------|----------------|------|----------------------------------------------------------------------------------------------------------------------------------------------------------------------------------------------|--|----|---|-----|---|---------------|--|----|---|-----|---|--------------------|--|-----|---|-----|---|-------------------------------------------------------------------|
| <b>Delphi Score</b>                                         | Kim et al. (2016) <sup>36</sup>           | Dev: 112(20)<br>Val: 99(18)<br><br>(incident delirium) | Sens .81<br>Spec .93<br>PPV .70<br>NPV .96<br><br>Optimal cut-off score: 6.5pts                                                                                                                                                                                                                                                                                                                                                                                                                                                                                 | Dev: 0.911<br>(0.88-0.94)<br>Val: 0.938<br>(0.91-0.97) | <table border="1"> <tr><td colspan="2">Age (years)</td></tr> <tr><td>60-69</td><td>0</td></tr> <tr><td>70-79</td><td>1</td></tr> <tr><td>≥80</td><td>2</td></tr> <tr><td colspan="2">Low Physical Activity</td></tr> <tr><td>Self-sufficient</td><td>0</td></tr> <tr><td>Need assist.</td><td>2</td></tr> <tr><td colspan="2">Heavy ETOH</td></tr> <tr><td>No</td><td>0</td></tr> <tr><td>Yes</td><td>1</td></tr> <tr><td colspan="2">Hearing Impairment</td></tr> <tr><td>No</td><td>0</td></tr> <tr><td>Yes</td><td>1</td></tr> <tr><td colspan="2">History of delirium</td></tr> <tr><td>No</td><td>0</td></tr> <tr><td>Yes</td><td>2</td></tr> <tr><td colspan="2">Emergency Surgery</td></tr> <tr><td>No</td><td>0</td></tr> <tr><td>Yes</td><td>1</td></tr> <tr><td colspan="2">Open Surgery</td></tr> <tr><td>No</td><td>0</td></tr> <tr><td>Yes</td><td>2</td></tr> <tr><td colspan="2">ICU Admission</td></tr> <tr><td>No</td><td>0</td></tr> <tr><td>Yes</td><td>3</td></tr> <tr><td colspan="2">Pre-Op CRP (mg/dL)</td></tr> <tr><td>&lt;10</td><td>0</td></tr> <tr><td>≥10</td><td>1</td></tr> </table> <p>Max points: 15<br/>Optimal cut-off: 6.5<br/>High Risk: ≥7 points</p> | Age (years)                                                       |      | 60-69             | 0           | 70-79                                                       | 1    | ≥80               | 2        | Low Physical Activity                                           |             | Self-sufficient | 0    | Need assist. | 2    | Heavy ETOH |             | No   | 0    | Yes         | 1                                                                                                                                                                                                                                                                                                                                                                                                                                                                                                                                                         | Hearing Impairment |  | No         | 0    | Yes                             | 1 | History of delirium |      | No         | 0    | Yes       | 2    | Emergency Surgery |      | No     | 0    | Yes            | 1    | Open Surgery                                                                                                                                                                                 |  | No | 0 | Yes | 2 | ICU Admission |  | No | 0 | Yes | 3 | Pre-Op CRP (mg/dL) |  | <10 | 0 | ≥10 | 1 | No measure of cognition.<br><br>Excluded participants if MMSE <24 |
| Age (years)                                                 |                                           |                                                        |                                                                                                                                                                                                                                                                                                                                                                                                                                                                                                                                                                 |                                                        |                                                                                                                                                                                                                                                                                                                                                                                                                                                                                                                                                                                                                                                                                                                                                                                                                                                                                                                                                                                                                                                                                                                                                                                             |                                                                   |      |                   |             |                                                             |      |                   |          |                                                                 |             |                 |      |              |      |            |             |      |      |             |                                                                                                                                                                                                                                                                                                                                                                                                                                                                                                                                                           |                    |  |            |      |                                 |   |                     |      |            |      |           |      |                   |      |        |      |                |      |                                                                                                                                                                                              |  |    |   |     |   |               |  |    |   |     |   |                    |  |     |   |     |   |                                                                   |
| 60-69                                                       | 0                                         |                                                        |                                                                                                                                                                                                                                                                                                                                                                                                                                                                                                                                                                 |                                                        |                                                                                                                                                                                                                                                                                                                                                                                                                                                                                                                                                                                                                                                                                                                                                                                                                                                                                                                                                                                                                                                                                                                                                                                             |                                                                   |      |                   |             |                                                             |      |                   |          |                                                                 |             |                 |      |              |      |            |             |      |      |             |                                                                                                                                                                                                                                                                                                                                                                                                                                                                                                                                                           |                    |  |            |      |                                 |   |                     |      |            |      |           |      |                   |      |        |      |                |      |                                                                                                                                                                                              |  |    |   |     |   |               |  |    |   |     |   |                    |  |     |   |     |   |                                                                   |
| 70-79                                                       | 1                                         |                                                        |                                                                                                                                                                                                                                                                                                                                                                                                                                                                                                                                                                 |                                                        |                                                                                                                                                                                                                                                                                                                                                                                                                                                                                                                                                                                                                                                                                                                                                                                                                                                                                                                                                                                                                                                                                                                                                                                             |                                                                   |      |                   |             |                                                             |      |                   |          |                                                                 |             |                 |      |              |      |            |             |      |      |             |                                                                                                                                                                                                                                                                                                                                                                                                                                                                                                                                                           |                    |  |            |      |                                 |   |                     |      |            |      |           |      |                   |      |        |      |                |      |                                                                                                                                                                                              |  |    |   |     |   |               |  |    |   |     |   |                    |  |     |   |     |   |                                                                   |
| ≥80                                                         | 2                                         |                                                        |                                                                                                                                                                                                                                                                                                                                                                                                                                                                                                                                                                 |                                                        |                                                                                                                                                                                                                                                                                                                                                                                                                                                                                                                                                                                                                                                                                                                                                                                                                                                                                                                                                                                                                                                                                                                                                                                             |                                                                   |      |                   |             |                                                             |      |                   |          |                                                                 |             |                 |      |              |      |            |             |      |      |             |                                                                                                                                                                                                                                                                                                                                                                                                                                                                                                                                                           |                    |  |            |      |                                 |   |                     |      |            |      |           |      |                   |      |        |      |                |      |                                                                                                                                                                                              |  |    |   |     |   |               |  |    |   |     |   |                    |  |     |   |     |   |                                                                   |
| Low Physical Activity                                       |                                           |                                                        |                                                                                                                                                                                                                                                                                                                                                                                                                                                                                                                                                                 |                                                        |                                                                                                                                                                                                                                                                                                                                                                                                                                                                                                                                                                                                                                                                                                                                                                                                                                                                                                                                                                                                                                                                                                                                                                                             |                                                                   |      |                   |             |                                                             |      |                   |          |                                                                 |             |                 |      |              |      |            |             |      |      |             |                                                                                                                                                                                                                                                                                                                                                                                                                                                                                                                                                           |                    |  |            |      |                                 |   |                     |      |            |      |           |      |                   |      |        |      |                |      |                                                                                                                                                                                              |  |    |   |     |   |               |  |    |   |     |   |                    |  |     |   |     |   |                                                                   |
| Self-sufficient                                             | 0                                         |                                                        |                                                                                                                                                                                                                                                                                                                                                                                                                                                                                                                                                                 |                                                        |                                                                                                                                                                                                                                                                                                                                                                                                                                                                                                                                                                                                                                                                                                                                                                                                                                                                                                                                                                                                                                                                                                                                                                                             |                                                                   |      |                   |             |                                                             |      |                   |          |                                                                 |             |                 |      |              |      |            |             |      |      |             |                                                                                                                                                                                                                                                                                                                                                                                                                                                                                                                                                           |                    |  |            |      |                                 |   |                     |      |            |      |           |      |                   |      |        |      |                |      |                                                                                                                                                                                              |  |    |   |     |   |               |  |    |   |     |   |                    |  |     |   |     |   |                                                                   |
| Need assist.                                                | 2                                         |                                                        |                                                                                                                                                                                                                                                                                                                                                                                                                                                                                                                                                                 |                                                        |                                                                                                                                                                                                                                                                                                                                                                                                                                                                                                                                                                                                                                                                                                                                                                                                                                                                                                                                                                                                                                                                                                                                                                                             |                                                                   |      |                   |             |                                                             |      |                   |          |                                                                 |             |                 |      |              |      |            |             |      |      |             |                                                                                                                                                                                                                                                                                                                                                                                                                                                                                                                                                           |                    |  |            |      |                                 |   |                     |      |            |      |           |      |                   |      |        |      |                |      |                                                                                                                                                                                              |  |    |   |     |   |               |  |    |   |     |   |                    |  |     |   |     |   |                                                                   |
| Heavy ETOH                                                  |                                           |                                                        |                                                                                                                                                                                                                                                                                                                                                                                                                                                                                                                                                                 |                                                        |                                                                                                                                                                                                                                                                                                                                                                                                                                                                                                                                                                                                                                                                                                                                                                                                                                                                                                                                                                                                                                                                                                                                                                                             |                                                                   |      |                   |             |                                                             |      |                   |          |                                                                 |             |                 |      |              |      |            |             |      |      |             |                                                                                                                                                                                                                                                                                                                                                                                                                                                                                                                                                           |                    |  |            |      |                                 |   |                     |      |            |      |           |      |                   |      |        |      |                |      |                                                                                                                                                                                              |  |    |   |     |   |               |  |    |   |     |   |                    |  |     |   |     |   |                                                                   |
| No                                                          | 0                                         |                                                        |                                                                                                                                                                                                                                                                                                                                                                                                                                                                                                                                                                 |                                                        |                                                                                                                                                                                                                                                                                                                                                                                                                                                                                                                                                                                                                                                                                                                                                                                                                                                                                                                                                                                                                                                                                                                                                                                             |                                                                   |      |                   |             |                                                             |      |                   |          |                                                                 |             |                 |      |              |      |            |             |      |      |             |                                                                                                                                                                                                                                                                                                                                                                                                                                                                                                                                                           |                    |  |            |      |                                 |   |                     |      |            |      |           |      |                   |      |        |      |                |      |                                                                                                                                                                                              |  |    |   |     |   |               |  |    |   |     |   |                    |  |     |   |     |   |                                                                   |
| Yes                                                         | 1                                         |                                                        |                                                                                                                                                                                                                                                                                                                                                                                                                                                                                                                                                                 |                                                        |                                                                                                                                                                                                                                                                                                                                                                                                                                                                                                                                                                                                                                                                                                                                                                                                                                                                                                                                                                                                                                                                                                                                                                                             |                                                                   |      |                   |             |                                                             |      |                   |          |                                                                 |             |                 |      |              |      |            |             |      |      |             |                                                                                                                                                                                                                                                                                                                                                                                                                                                                                                                                                           |                    |  |            |      |                                 |   |                     |      |            |      |           |      |                   |      |        |      |                |      |                                                                                                                                                                                              |  |    |   |     |   |               |  |    |   |     |   |                    |  |     |   |     |   |                                                                   |
| Hearing Impairment                                          |                                           |                                                        |                                                                                                                                                                                                                                                                                                                                                                                                                                                                                                                                                                 |                                                        |                                                                                                                                                                                                                                                                                                                                                                                                                                                                                                                                                                                                                                                                                                                                                                                                                                                                                                                                                                                                                                                                                                                                                                                             |                                                                   |      |                   |             |                                                             |      |                   |          |                                                                 |             |                 |      |              |      |            |             |      |      |             |                                                                                                                                                                                                                                                                                                                                                                                                                                                                                                                                                           |                    |  |            |      |                                 |   |                     |      |            |      |           |      |                   |      |        |      |                |      |                                                                                                                                                                                              |  |    |   |     |   |               |  |    |   |     |   |                    |  |     |   |     |   |                                                                   |
| No                                                          | 0                                         |                                                        |                                                                                                                                                                                                                                                                                                                                                                                                                                                                                                                                                                 |                                                        |                                                                                                                                                                                                                                                                                                                                                                                                                                                                                                                                                                                                                                                                                                                                                                                                                                                                                                                                                                                                                                                                                                                                                                                             |                                                                   |      |                   |             |                                                             |      |                   |          |                                                                 |             |                 |      |              |      |            |             |      |      |             |                                                                                                                                                                                                                                                                                                                                                                                                                                                                                                                                                           |                    |  |            |      |                                 |   |                     |      |            |      |           |      |                   |      |        |      |                |      |                                                                                                                                                                                              |  |    |   |     |   |               |  |    |   |     |   |                    |  |     |   |     |   |                                                                   |
| Yes                                                         | 1                                         |                                                        |                                                                                                                                                                                                                                                                                                                                                                                                                                                                                                                                                                 |                                                        |                                                                                                                                                                                                                                                                                                                                                                                                                                                                                                                                                                                                                                                                                                                                                                                                                                                                                                                                                                                                                                                                                                                                                                                             |                                                                   |      |                   |             |                                                             |      |                   |          |                                                                 |             |                 |      |              |      |            |             |      |      |             |                                                                                                                                                                                                                                                                                                                                                                                                                                                                                                                                                           |                    |  |            |      |                                 |   |                     |      |            |      |           |      |                   |      |        |      |                |      |                                                                                                                                                                                              |  |    |   |     |   |               |  |    |   |     |   |                    |  |     |   |     |   |                                                                   |
| History of delirium                                         |                                           |                                                        |                                                                                                                                                                                                                                                                                                                                                                                                                                                                                                                                                                 |                                                        |                                                                                                                                                                                                                                                                                                                                                                                                                                                                                                                                                                                                                                                                                                                                                                                                                                                                                                                                                                                                                                                                                                                                                                                             |                                                                   |      |                   |             |                                                             |      |                   |          |                                                                 |             |                 |      |              |      |            |             |      |      |             |                                                                                                                                                                                                                                                                                                                                                                                                                                                                                                                                                           |                    |  |            |      |                                 |   |                     |      |            |      |           |      |                   |      |        |      |                |      |                                                                                                                                                                                              |  |    |   |     |   |               |  |    |   |     |   |                    |  |     |   |     |   |                                                                   |
| No                                                          | 0                                         |                                                        |                                                                                                                                                                                                                                                                                                                                                                                                                                                                                                                                                                 |                                                        |                                                                                                                                                                                                                                                                                                                                                                                                                                                                                                                                                                                                                                                                                                                                                                                                                                                                                                                                                                                                                                                                                                                                                                                             |                                                                   |      |                   |             |                                                             |      |                   |          |                                                                 |             |                 |      |              |      |            |             |      |      |             |                                                                                                                                                                                                                                                                                                                                                                                                                                                                                                                                                           |                    |  |            |      |                                 |   |                     |      |            |      |           |      |                   |      |        |      |                |      |                                                                                                                                                                                              |  |    |   |     |   |               |  |    |   |     |   |                    |  |     |   |     |   |                                                                   |
| Yes                                                         | 2                                         |                                                        |                                                                                                                                                                                                                                                                                                                                                                                                                                                                                                                                                                 |                                                        |                                                                                                                                                                                                                                                                                                                                                                                                                                                                                                                                                                                                                                                                                                                                                                                                                                                                                                                                                                                                                                                                                                                                                                                             |                                                                   |      |                   |             |                                                             |      |                   |          |                                                                 |             |                 |      |              |      |            |             |      |      |             |                                                                                                                                                                                                                                                                                                                                                                                                                                                                                                                                                           |                    |  |            |      |                                 |   |                     |      |            |      |           |      |                   |      |        |      |                |      |                                                                                                                                                                                              |  |    |   |     |   |               |  |    |   |     |   |                    |  |     |   |     |   |                                                                   |
| Emergency Surgery                                           |                                           |                                                        |                                                                                                                                                                                                                                                                                                                                                                                                                                                                                                                                                                 |                                                        |                                                                                                                                                                                                                                                                                                                                                                                                                                                                                                                                                                                                                                                                                                                                                                                                                                                                                                                                                                                                                                                                                                                                                                                             |                                                                   |      |                   |             |                                                             |      |                   |          |                                                                 |             |                 |      |              |      |            |             |      |      |             |                                                                                                                                                                                                                                                                                                                                                                                                                                                                                                                                                           |                    |  |            |      |                                 |   |                     |      |            |      |           |      |                   |      |        |      |                |      |                                                                                                                                                                                              |  |    |   |     |   |               |  |    |   |     |   |                    |  |     |   |     |   |                                                                   |
| No                                                          | 0                                         |                                                        |                                                                                                                                                                                                                                                                                                                                                                                                                                                                                                                                                                 |                                                        |                                                                                                                                                                                                                                                                                                                                                                                                                                                                                                                                                                                                                                                                                                                                                                                                                                                                                                                                                                                                                                                                                                                                                                                             |                                                                   |      |                   |             |                                                             |      |                   |          |                                                                 |             |                 |      |              |      |            |             |      |      |             |                                                                                                                                                                                                                                                                                                                                                                                                                                                                                                                                                           |                    |  |            |      |                                 |   |                     |      |            |      |           |      |                   |      |        |      |                |      |                                                                                                                                                                                              |  |    |   |     |   |               |  |    |   |     |   |                    |  |     |   |     |   |                                                                   |
| Yes                                                         | 1                                         |                                                        |                                                                                                                                                                                                                                                                                                                                                                                                                                                                                                                                                                 |                                                        |                                                                                                                                                                                                                                                                                                                                                                                                                                                                                                                                                                                                                                                                                                                                                                                                                                                                                                                                                                                                                                                                                                                                                                                             |                                                                   |      |                   |             |                                                             |      |                   |          |                                                                 |             |                 |      |              |      |            |             |      |      |             |                                                                                                                                                                                                                                                                                                                                                                                                                                                                                                                                                           |                    |  |            |      |                                 |   |                     |      |            |      |           |      |                   |      |        |      |                |      |                                                                                                                                                                                              |  |    |   |     |   |               |  |    |   |     |   |                    |  |     |   |     |   |                                                                   |
| Open Surgery                                                |                                           |                                                        |                                                                                                                                                                                                                                                                                                                                                                                                                                                                                                                                                                 |                                                        |                                                                                                                                                                                                                                                                                                                                                                                                                                                                                                                                                                                                                                                                                                                                                                                                                                                                                                                                                                                                                                                                                                                                                                                             |                                                                   |      |                   |             |                                                             |      |                   |          |                                                                 |             |                 |      |              |      |            |             |      |      |             |                                                                                                                                                                                                                                                                                                                                                                                                                                                                                                                                                           |                    |  |            |      |                                 |   |                     |      |            |      |           |      |                   |      |        |      |                |      |                                                                                                                                                                                              |  |    |   |     |   |               |  |    |   |     |   |                    |  |     |   |     |   |                                                                   |
| No                                                          | 0                                         |                                                        |                                                                                                                                                                                                                                                                                                                                                                                                                                                                                                                                                                 |                                                        |                                                                                                                                                                                                                                                                                                                                                                                                                                                                                                                                                                                                                                                                                                                                                                                                                                                                                                                                                                                                                                                                                                                                                                                             |                                                                   |      |                   |             |                                                             |      |                   |          |                                                                 |             |                 |      |              |      |            |             |      |      |             |                                                                                                                                                                                                                                                                                                                                                                                                                                                                                                                                                           |                    |  |            |      |                                 |   |                     |      |            |      |           |      |                   |      |        |      |                |      |                                                                                                                                                                                              |  |    |   |     |   |               |  |    |   |     |   |                    |  |     |   |     |   |                                                                   |
| Yes                                                         | 2                                         |                                                        |                                                                                                                                                                                                                                                                                                                                                                                                                                                                                                                                                                 |                                                        |                                                                                                                                                                                                                                                                                                                                                                                                                                                                                                                                                                                                                                                                                                                                                                                                                                                                                                                                                                                                                                                                                                                                                                                             |                                                                   |      |                   |             |                                                             |      |                   |          |                                                                 |             |                 |      |              |      |            |             |      |      |             |                                                                                                                                                                                                                                                                                                                                                                                                                                                                                                                                                           |                    |  |            |      |                                 |   |                     |      |            |      |           |      |                   |      |        |      |                |      |                                                                                                                                                                                              |  |    |   |     |   |               |  |    |   |     |   |                    |  |     |   |     |   |                                                                   |
| ICU Admission                                               |                                           |                                                        |                                                                                                                                                                                                                                                                                                                                                                                                                                                                                                                                                                 |                                                        |                                                                                                                                                                                                                                                                                                                                                                                                                                                                                                                                                                                                                                                                                                                                                                                                                                                                                                                                                                                                                                                                                                                                                                                             |                                                                   |      |                   |             |                                                             |      |                   |          |                                                                 |             |                 |      |              |      |            |             |      |      |             |                                                                                                                                                                                                                                                                                                                                                                                                                                                                                                                                                           |                    |  |            |      |                                 |   |                     |      |            |      |           |      |                   |      |        |      |                |      |                                                                                                                                                                                              |  |    |   |     |   |               |  |    |   |     |   |                    |  |     |   |     |   |                                                                   |
| No                                                          | 0                                         |                                                        |                                                                                                                                                                                                                                                                                                                                                                                                                                                                                                                                                                 |                                                        |                                                                                                                                                                                                                                                                                                                                                                                                                                                                                                                                                                                                                                                                                                                                                                                                                                                                                                                                                                                                                                                                                                                                                                                             |                                                                   |      |                   |             |                                                             |      |                   |          |                                                                 |             |                 |      |              |      |            |             |      |      |             |                                                                                                                                                                                                                                                                                                                                                                                                                                                                                                                                                           |                    |  |            |      |                                 |   |                     |      |            |      |           |      |                   |      |        |      |                |      |                                                                                                                                                                                              |  |    |   |     |   |               |  |    |   |     |   |                    |  |     |   |     |   |                                                                   |
| Yes                                                         | 3                                         |                                                        |                                                                                                                                                                                                                                                                                                                                                                                                                                                                                                                                                                 |                                                        |                                                                                                                                                                                                                                                                                                                                                                                                                                                                                                                                                                                                                                                                                                                                                                                                                                                                                                                                                                                                                                                                                                                                                                                             |                                                                   |      |                   |             |                                                             |      |                   |          |                                                                 |             |                 |      |              |      |            |             |      |      |             |                                                                                                                                                                                                                                                                                                                                                                                                                                                                                                                                                           |                    |  |            |      |                                 |   |                     |      |            |      |           |      |                   |      |        |      |                |      |                                                                                                                                                                                              |  |    |   |     |   |               |  |    |   |     |   |                    |  |     |   |     |   |                                                                   |
| Pre-Op CRP (mg/dL)                                          |                                           |                                                        |                                                                                                                                                                                                                                                                                                                                                                                                                                                                                                                                                                 |                                                        |                                                                                                                                                                                                                                                                                                                                                                                                                                                                                                                                                                                                                                                                                                                                                                                                                                                                                                                                                                                                                                                                                                                                                                                             |                                                                   |      |                   |             |                                                             |      |                   |          |                                                                 |             |                 |      |              |      |            |             |      |      |             |                                                                                                                                                                                                                                                                                                                                                                                                                                                                                                                                                           |                    |  |            |      |                                 |   |                     |      |            |      |           |      |                   |      |        |      |                |      |                                                                                                                                                                                              |  |    |   |     |   |               |  |    |   |     |   |                    |  |     |   |     |   |                                                                   |
| <10                                                         | 0                                         |                                                        |                                                                                                                                                                                                                                                                                                                                                                                                                                                                                                                                                                 |                                                        |                                                                                                                                                                                                                                                                                                                                                                                                                                                                                                                                                                                                                                                                                                                                                                                                                                                                                                                                                                                                                                                                                                                                                                                             |                                                                   |      |                   |             |                                                             |      |                   |          |                                                                 |             |                 |      |              |      |            |             |      |      |             |                                                                                                                                                                                                                                                                                                                                                                                                                                                                                                                                                           |                    |  |            |      |                                 |   |                     |      |            |      |           |      |                   |      |        |      |                |      |                                                                                                                                                                                              |  |    |   |     |   |               |  |    |   |     |   |                    |  |     |   |     |   |                                                                   |
| ≥10                                                         | 1                                         |                                                        |                                                                                                                                                                                                                                                                                                                                                                                                                                                                                                                                                                 |                                                        |                                                                                                                                                                                                                                                                                                                                                                                                                                                                                                                                                                                                                                                                                                                                                                                                                                                                                                                                                                                                                                                                                                                                                                                             |                                                                   |      |                   |             |                                                             |      |                   |          |                                                                 |             |                 |      |              |      |            |             |      |      |             |                                                                                                                                                                                                                                                                                                                                                                                                                                                                                                                                                           |                    |  |            |      |                                 |   |                     |      |            |      |           |      |                   |      |        |      |                |      |                                                                                                                                                                                              |  |    |   |     |   |               |  |    |   |     |   |                    |  |     |   |     |   |                                                                   |
| <b>e-NICE Rule</b>                                          | <b>Rudolph et al. (2016)<sup>45</sup></b> | Dev: 2343(8)<br>Val:64(26)<br><br>(incident delirium)  | <table border="1"> <tr><th>Cohort</th><th>AUROC</th><th>CI</th></tr> <tr><td>Dev</td><td>0.81</td><td>(0.80-0.82)</td></tr> <tr><td colspan="3">Validation AUROCs*</td></tr> <tr><td>Original</td><td>0.69</td><td>(0.61-0.77)</td></tr> <tr><td>mRASS</td><td>0.72</td><td>(0.65-0.79)</td></tr> <tr><td>TMYB</td><td>0.73</td><td>(0.66-0.80)</td></tr> <tr><td>MoCA</td><td>0.74</td><td>(0.66-0.81)</td></tr> </table> <p>*Any delirium<br/>Original model-AUROC of 0.68 (95%CI0.59-0.77) in incident delirium.<br/>Did not report sens, spec, PPV, NPV</p> | Cohort                                                 | AUROC                                                                                                                                                                                                                                                                                                                                                                                                                                                                                                                                                                                                                                                                                                                                                                                                                                                                                                                                                                                                                                                                                                                                                                                       | CI                                                                | Dev  | 0.81              | (0.80-0.82) | Validation AUROCs*                                          |      |                   | Original | 0.69                                                            | (0.61-0.77) | mRASS           | 0.72 | (0.65-0.79)  | TMYB | 0.73       | (0.66-0.80) | MoCA | 0.74 | (0.66-0.81) | <table border="1"> <tr><th colspan="2">Weighted Points/OR</th></tr> <tr><td>Cog impair</td><td>4 pt</td></tr> <tr><td>-Medications, diagnosis or both</td><td></td></tr> <tr><td>Age ≥ 65 y</td><td>2 pt</td></tr> <tr><td>Age ≥ 80 y</td><td>3 pt</td></tr> <tr><td>Infection</td><td>2 pt</td></tr> <tr><td>Fracture</td><td>4 pt</td></tr> <tr><td>Vision</td><td>1 pt</td></tr> <tr><td>Severe Illness</td><td>2 pt</td></tr> </table> <p>0-2 pts = Low Risk<br/>2-5 pts = Intermediate Risk<br/>6-8 pts = High Risk<br/>≥ 9 pts = Very High Risk</p> | Weighted Points/OR |  | Cog impair | 4 pt | -Medications, diagnosis or both |   | Age ≥ 65 y          | 2 pt | Age ≥ 80 y | 3 pt | Infection | 2 pt | Fracture          | 4 pt | Vision | 1 pt | Severe Illness | 2 pt | e-NICE Tool<br>Diagnosis of dementia, medications for dementia or both qualified as "cognitive impairment" in model.<br><br>Prospective cohort, additional:<br>-mRASS<br>-TMYB<br>-MoCA ≤ 18 |  |    |   |     |   |               |  |    |   |     |   |                    |  |     |   |     |   |                                                                   |
| Cohort                                                      | AUROC                                     | CI                                                     |                                                                                                                                                                                                                                                                                                                                                                                                                                                                                                                                                                 |                                                        |                                                                                                                                                                                                                                                                                                                                                                                                                                                                                                                                                                                                                                                                                                                                                                                                                                                                                                                                                                                                                                                                                                                                                                                             |                                                                   |      |                   |             |                                                             |      |                   |          |                                                                 |             |                 |      |              |      |            |             |      |      |             |                                                                                                                                                                                                                                                                                                                                                                                                                                                                                                                                                           |                    |  |            |      |                                 |   |                     |      |            |      |           |      |                   |      |        |      |                |      |                                                                                                                                                                                              |  |    |   |     |   |               |  |    |   |     |   |                    |  |     |   |     |   |                                                                   |
| Dev                                                         | 0.81                                      | (0.80-0.82)                                            |                                                                                                                                                                                                                                                                                                                                                                                                                                                                                                                                                                 |                                                        |                                                                                                                                                                                                                                                                                                                                                                                                                                                                                                                                                                                                                                                                                                                                                                                                                                                                                                                                                                                                                                                                                                                                                                                             |                                                                   |      |                   |             |                                                             |      |                   |          |                                                                 |             |                 |      |              |      |            |             |      |      |             |                                                                                                                                                                                                                                                                                                                                                                                                                                                                                                                                                           |                    |  |            |      |                                 |   |                     |      |            |      |           |      |                   |      |        |      |                |      |                                                                                                                                                                                              |  |    |   |     |   |               |  |    |   |     |   |                    |  |     |   |     |   |                                                                   |
| Validation AUROCs*                                          |                                           |                                                        |                                                                                                                                                                                                                                                                                                                                                                                                                                                                                                                                                                 |                                                        |                                                                                                                                                                                                                                                                                                                                                                                                                                                                                                                                                                                                                                                                                                                                                                                                                                                                                                                                                                                                                                                                                                                                                                                             |                                                                   |      |                   |             |                                                             |      |                   |          |                                                                 |             |                 |      |              |      |            |             |      |      |             |                                                                                                                                                                                                                                                                                                                                                                                                                                                                                                                                                           |                    |  |            |      |                                 |   |                     |      |            |      |           |      |                   |      |        |      |                |      |                                                                                                                                                                                              |  |    |   |     |   |               |  |    |   |     |   |                    |  |     |   |     |   |                                                                   |
| Original                                                    | 0.69                                      | (0.61-0.77)                                            |                                                                                                                                                                                                                                                                                                                                                                                                                                                                                                                                                                 |                                                        |                                                                                                                                                                                                                                                                                                                                                                                                                                                                                                                                                                                                                                                                                                                                                                                                                                                                                                                                                                                                                                                                                                                                                                                             |                                                                   |      |                   |             |                                                             |      |                   |          |                                                                 |             |                 |      |              |      |            |             |      |      |             |                                                                                                                                                                                                                                                                                                                                                                                                                                                                                                                                                           |                    |  |            |      |                                 |   |                     |      |            |      |           |      |                   |      |        |      |                |      |                                                                                                                                                                                              |  |    |   |     |   |               |  |    |   |     |   |                    |  |     |   |     |   |                                                                   |
| mRASS                                                       | 0.72                                      | (0.65-0.79)                                            |                                                                                                                                                                                                                                                                                                                                                                                                                                                                                                                                                                 |                                                        |                                                                                                                                                                                                                                                                                                                                                                                                                                                                                                                                                                                                                                                                                                                                                                                                                                                                                                                                                                                                                                                                                                                                                                                             |                                                                   |      |                   |             |                                                             |      |                   |          |                                                                 |             |                 |      |              |      |            |             |      |      |             |                                                                                                                                                                                                                                                                                                                                                                                                                                                                                                                                                           |                    |  |            |      |                                 |   |                     |      |            |      |           |      |                   |      |        |      |                |      |                                                                                                                                                                                              |  |    |   |     |   |               |  |    |   |     |   |                    |  |     |   |     |   |                                                                   |
| TMYB                                                        | 0.73                                      | (0.66-0.80)                                            |                                                                                                                                                                                                                                                                                                                                                                                                                                                                                                                                                                 |                                                        |                                                                                                                                                                                                                                                                                                                                                                                                                                                                                                                                                                                                                                                                                                                                                                                                                                                                                                                                                                                                                                                                                                                                                                                             |                                                                   |      |                   |             |                                                             |      |                   |          |                                                                 |             |                 |      |              |      |            |             |      |      |             |                                                                                                                                                                                                                                                                                                                                                                                                                                                                                                                                                           |                    |  |            |      |                                 |   |                     |      |            |      |           |      |                   |      |        |      |                |      |                                                                                                                                                                                              |  |    |   |     |   |               |  |    |   |     |   |                    |  |     |   |     |   |                                                                   |
| MoCA                                                        | 0.74                                      | (0.66-0.81)                                            |                                                                                                                                                                                                                                                                                                                                                                                                                                                                                                                                                                 |                                                        |                                                                                                                                                                                                                                                                                                                                                                                                                                                                                                                                                                                                                                                                                                                                                                                                                                                                                                                                                                                                                                                                                                                                                                                             |                                                                   |      |                   |             |                                                             |      |                   |          |                                                                 |             |                 |      |              |      |            |             |      |      |             |                                                                                                                                                                                                                                                                                                                                                                                                                                                                                                                                                           |                    |  |            |      |                                 |   |                     |      |            |      |           |      |                   |      |        |      |                |      |                                                                                                                                                                                              |  |    |   |     |   |               |  |    |   |     |   |                    |  |     |   |     |   |                                                                   |
| Weighted Points/OR                                          |                                           |                                                        |                                                                                                                                                                                                                                                                                                                                                                                                                                                                                                                                                                 |                                                        |                                                                                                                                                                                                                                                                                                                                                                                                                                                                                                                                                                                                                                                                                                                                                                                                                                                                                                                                                                                                                                                                                                                                                                                             |                                                                   |      |                   |             |                                                             |      |                   |          |                                                                 |             |                 |      |              |      |            |             |      |      |             |                                                                                                                                                                                                                                                                                                                                                                                                                                                                                                                                                           |                    |  |            |      |                                 |   |                     |      |            |      |           |      |                   |      |        |      |                |      |                                                                                                                                                                                              |  |    |   |     |   |               |  |    |   |     |   |                    |  |     |   |     |   |                                                                   |
| Cog impair                                                  | 4 pt                                      |                                                        |                                                                                                                                                                                                                                                                                                                                                                                                                                                                                                                                                                 |                                                        |                                                                                                                                                                                                                                                                                                                                                                                                                                                                                                                                                                                                                                                                                                                                                                                                                                                                                                                                                                                                                                                                                                                                                                                             |                                                                   |      |                   |             |                                                             |      |                   |          |                                                                 |             |                 |      |              |      |            |             |      |      |             |                                                                                                                                                                                                                                                                                                                                                                                                                                                                                                                                                           |                    |  |            |      |                                 |   |                     |      |            |      |           |      |                   |      |        |      |                |      |                                                                                                                                                                                              |  |    |   |     |   |               |  |    |   |     |   |                    |  |     |   |     |   |                                                                   |
| -Medications, diagnosis or both                             |                                           |                                                        |                                                                                                                                                                                                                                                                                                                                                                                                                                                                                                                                                                 |                                                        |                                                                                                                                                                                                                                                                                                                                                                                                                                                                                                                                                                                                                                                                                                                                                                                                                                                                                                                                                                                                                                                                                                                                                                                             |                                                                   |      |                   |             |                                                             |      |                   |          |                                                                 |             |                 |      |              |      |            |             |      |      |             |                                                                                                                                                                                                                                                                                                                                                                                                                                                                                                                                                           |                    |  |            |      |                                 |   |                     |      |            |      |           |      |                   |      |        |      |                |      |                                                                                                                                                                                              |  |    |   |     |   |               |  |    |   |     |   |                    |  |     |   |     |   |                                                                   |
| Age ≥ 65 y                                                  | 2 pt                                      |                                                        |                                                                                                                                                                                                                                                                                                                                                                                                                                                                                                                                                                 |                                                        |                                                                                                                                                                                                                                                                                                                                                                                                                                                                                                                                                                                                                                                                                                                                                                                                                                                                                                                                                                                                                                                                                                                                                                                             |                                                                   |      |                   |             |                                                             |      |                   |          |                                                                 |             |                 |      |              |      |            |             |      |      |             |                                                                                                                                                                                                                                                                                                                                                                                                                                                                                                                                                           |                    |  |            |      |                                 |   |                     |      |            |      |           |      |                   |      |        |      |                |      |                                                                                                                                                                                              |  |    |   |     |   |               |  |    |   |     |   |                    |  |     |   |     |   |                                                                   |
| Age ≥ 80 y                                                  | 3 pt                                      |                                                        |                                                                                                                                                                                                                                                                                                                                                                                                                                                                                                                                                                 |                                                        |                                                                                                                                                                                                                                                                                                                                                                                                                                                                                                                                                                                                                                                                                                                                                                                                                                                                                                                                                                                                                                                                                                                                                                                             |                                                                   |      |                   |             |                                                             |      |                   |          |                                                                 |             |                 |      |              |      |            |             |      |      |             |                                                                                                                                                                                                                                                                                                                                                                                                                                                                                                                                                           |                    |  |            |      |                                 |   |                     |      |            |      |           |      |                   |      |        |      |                |      |                                                                                                                                                                                              |  |    |   |     |   |               |  |    |   |     |   |                    |  |     |   |     |   |                                                                   |
| Infection                                                   | 2 pt                                      |                                                        |                                                                                                                                                                                                                                                                                                                                                                                                                                                                                                                                                                 |                                                        |                                                                                                                                                                                                                                                                                                                                                                                                                                                                                                                                                                                                                                                                                                                                                                                                                                                                                                                                                                                                                                                                                                                                                                                             |                                                                   |      |                   |             |                                                             |      |                   |          |                                                                 |             |                 |      |              |      |            |             |      |      |             |                                                                                                                                                                                                                                                                                                                                                                                                                                                                                                                                                           |                    |  |            |      |                                 |   |                     |      |            |      |           |      |                   |      |        |      |                |      |                                                                                                                                                                                              |  |    |   |     |   |               |  |    |   |     |   |                    |  |     |   |     |   |                                                                   |
| Fracture                                                    | 4 pt                                      |                                                        |                                                                                                                                                                                                                                                                                                                                                                                                                                                                                                                                                                 |                                                        |                                                                                                                                                                                                                                                                                                                                                                                                                                                                                                                                                                                                                                                                                                                                                                                                                                                                                                                                                                                                                                                                                                                                                                                             |                                                                   |      |                   |             |                                                             |      |                   |          |                                                                 |             |                 |      |              |      |            |             |      |      |             |                                                                                                                                                                                                                                                                                                                                                                                                                                                                                                                                                           |                    |  |            |      |                                 |   |                     |      |            |      |           |      |                   |      |        |      |                |      |                                                                                                                                                                                              |  |    |   |     |   |               |  |    |   |     |   |                    |  |     |   |     |   |                                                                   |
| Vision                                                      | 1 pt                                      |                                                        |                                                                                                                                                                                                                                                                                                                                                                                                                                                                                                                                                                 |                                                        |                                                                                                                                                                                                                                                                                                                                                                                                                                                                                                                                                                                                                                                                                                                                                                                                                                                                                                                                                                                                                                                                                                                                                                                             |                                                                   |      |                   |             |                                                             |      |                   |          |                                                                 |             |                 |      |              |      |            |             |      |      |             |                                                                                                                                                                                                                                                                                                                                                                                                                                                                                                                                                           |                    |  |            |      |                                 |   |                     |      |            |      |           |      |                   |      |        |      |                |      |                                                                                                                                                                                              |  |    |   |     |   |               |  |    |   |     |   |                    |  |     |   |     |   |                                                                   |
| Severe Illness                                              | 2 pt                                      |                                                        |                                                                                                                                                                                                                                                                                                                                                                                                                                                                                                                                                                 |                                                        |                                                                                                                                                                                                                                                                                                                                                                                                                                                                                                                                                                                                                                                                                                                                                                                                                                                                                                                                                                                                                                                                                                                                                                                             |                                                                   |      |                   |             |                                                             |      |                   |          |                                                                 |             |                 |      |              |      |            |             |      |      |             |                                                                                                                                                                                                                                                                                                                                                                                                                                                                                                                                                           |                    |  |            |      |                                 |   |                     |      |            |      |           |      |                   |      |        |      |                |      |                                                                                                                                                                                              |  |    |   |     |   |               |  |    |   |     |   |                    |  |     |   |     |   |                                                                   |
| <b>Inouye Prediction Rule (IPR)</b>                         | Inouye et al. (1993) <sup>31</sup>        | Dev: 27(25)<br>Val: 29(17)<br><br>(incident delirium)  | Did not report                                                                                                                                                                                                                                                                                                                                                                                                                                                                                                                                                  | Dev: 0.74<br>(0.63-0.85)<br>Val: 0.66<br>(0.55-0.77)   | <table border="1"> <tr><td>Baseline cognitive impairment</td><td>1 pt</td></tr> <tr><td>High BUN/Cr ratio</td><td>1 pt</td></tr> <tr><td>Severe illness (Composite score: APACHE II &gt;16 + RN rating)</td><td>1 pt</td></tr> <tr><td>Vision impairment</td><td>1 pt</td></tr> </table> <p>Not weighted.<br/>0 pts = Low risk</p>                                                                                                                                                                                                                                                                                                                                                                                                                                                                                                                                                                                                                                                                                                                                                                                                                                                          | Baseline cognitive impairment                                     | 1 pt | High BUN/Cr ratio | 1 pt        | Severe illness (Composite score: APACHE II >16 + RN rating) | 1 pt | Vision impairment | 1 pt     | MMSE Cut-off < 24<br><br>Family/care giver bDRS<br><br>Excluded |             |                 |      |              |      |            |             |      |      |             |                                                                                                                                                                                                                                                                                                                                                                                                                                                                                                                                                           |                    |  |            |      |                                 |   |                     |      |            |      |           |      |                   |      |        |      |                |      |                                                                                                                                                                                              |  |    |   |     |   |               |  |    |   |     |   |                    |  |     |   |     |   |                                                                   |
| Baseline cognitive impairment                               | 1 pt                                      |                                                        |                                                                                                                                                                                                                                                                                                                                                                                                                                                                                                                                                                 |                                                        |                                                                                                                                                                                                                                                                                                                                                                                                                                                                                                                                                                                                                                                                                                                                                                                                                                                                                                                                                                                                                                                                                                                                                                                             |                                                                   |      |                   |             |                                                             |      |                   |          |                                                                 |             |                 |      |              |      |            |             |      |      |             |                                                                                                                                                                                                                                                                                                                                                                                                                                                                                                                                                           |                    |  |            |      |                                 |   |                     |      |            |      |           |      |                   |      |        |      |                |      |                                                                                                                                                                                              |  |    |   |     |   |               |  |    |   |     |   |                    |  |     |   |     |   |                                                                   |
| High BUN/Cr ratio                                           | 1 pt                                      |                                                        |                                                                                                                                                                                                                                                                                                                                                                                                                                                                                                                                                                 |                                                        |                                                                                                                                                                                                                                                                                                                                                                                                                                                                                                                                                                                                                                                                                                                                                                                                                                                                                                                                                                                                                                                                                                                                                                                             |                                                                   |      |                   |             |                                                             |      |                   |          |                                                                 |             |                 |      |              |      |            |             |      |      |             |                                                                                                                                                                                                                                                                                                                                                                                                                                                                                                                                                           |                    |  |            |      |                                 |   |                     |      |            |      |           |      |                   |      |        |      |                |      |                                                                                                                                                                                              |  |    |   |     |   |               |  |    |   |     |   |                    |  |     |   |     |   |                                                                   |
| Severe illness (Composite score: APACHE II >16 + RN rating) | 1 pt                                      |                                                        |                                                                                                                                                                                                                                                                                                                                                                                                                                                                                                                                                                 |                                                        |                                                                                                                                                                                                                                                                                                                                                                                                                                                                                                                                                                                                                                                                                                                                                                                                                                                                                                                                                                                                                                                                                                                                                                                             |                                                                   |      |                   |             |                                                             |      |                   |          |                                                                 |             |                 |      |              |      |            |             |      |      |             |                                                                                                                                                                                                                                                                                                                                                                                                                                                                                                                                                           |                    |  |            |      |                                 |   |                     |      |            |      |           |      |                   |      |        |      |                |      |                                                                                                                                                                                              |  |    |   |     |   |               |  |    |   |     |   |                    |  |     |   |     |   |                                                                   |
| Vision impairment                                           | 1 pt                                      |                                                        |                                                                                                                                                                                                                                                                                                                                                                                                                                                                                                                                                                 |                                                        |                                                                                                                                                                                                                                                                                                                                                                                                                                                                                                                                                                                                                                                                                                                                                                                                                                                                                                                                                                                                                                                                                                                                                                                             |                                                                   |      |                   |             |                                                             |      |                   |          |                                                                 |             |                 |      |              |      |            |             |      |      |             |                                                                                                                                                                                                                                                                                                                                                                                                                                                                                                                                                           |                    |  |            |      |                                 |   |                     |      |            |      |           |      |                   |      |        |      |                |      |                                                                                                                                                                                              |  |    |   |     |   |               |  |    |   |     |   |                    |  |     |   |     |   |                                                                   |

|                                                                                             |                                        |                                                                                                               |                                                                                                                                                               |                                                                                                                                                                         |                                                                                                                                                                                                                                                                                                                                                                                                                                                                                                                                                                                                            |                                    |      |                       |      |                                                                                             |                               |                        |      |                                                                           |      |                                       |      |                                                                                    |
|---------------------------------------------------------------------------------------------|----------------------------------------|---------------------------------------------------------------------------------------------------------------|---------------------------------------------------------------------------------------------------------------------------------------------------------------|-------------------------------------------------------------------------------------------------------------------------------------------------------------------------|------------------------------------------------------------------------------------------------------------------------------------------------------------------------------------------------------------------------------------------------------------------------------------------------------------------------------------------------------------------------------------------------------------------------------------------------------------------------------------------------------------------------------------------------------------------------------------------------------------|------------------------------------|------|-----------------------|------|---------------------------------------------------------------------------------------------|-------------------------------|------------------------|------|---------------------------------------------------------------------------|------|---------------------------------------|------|------------------------------------------------------------------------------------|
|                                                                                             |                                        |                                                                                                               |                                                                                                                                                               |                                                                                                                                                                         | 1-2 pts = Intermediate risk<br>3-4 pts = High risk                                                                                                                                                                                                                                                                                                                                                                                                                                                                                                                                                         | those w/history of severe dementia |      |                       |      |                                                                                             |                               |                        |      |                                                                           |      |                                       |      |                                                                                    |
| <b>IPR</b>                                                                                  | Kalisvaart et al. (2006) <sup>35</sup> | Val: 74(12)                                                                                                   | Did not report                                                                                                                                                | Val: 0.73 (0.65-0.78)                                                                                                                                                   | Externally validated IPR in surgical hip fracture population.                                                                                                                                                                                                                                                                                                                                                                                                                                                                                                                                              | MMSE Cut-off < 24                  |      |                       |      |                                                                                             |                               |                        |      |                                                                           |      |                                       |      |                                                                                    |
| <b>IPR</b>                                                                                  | Rudolph et al. (2011) <sup>46</sup>    | Val: 23(23)<br>Any delirium<br><br>10-Prevalent<br>13-Incident                                                | Did not report                                                                                                                                                | Val: 0.56 (0.42-0.74)<br>Incident delirium                                                                                                                              | Externally validated IPR in medical VA population.                                                                                                                                                                                                                                                                                                                                                                                                                                                                                                                                                         | MMSE Cut-off < 24                  |      |                       |      |                                                                                             |                               |                        |      |                                                                           |      |                                       |      |                                                                                    |
| <b>IPR</b>                                                                                  | Pendlebury et al. (2016) <sup>34</sup> | Val: 95(31)<br>Any delirium<br><br>67-prevalent<br>28-incident                                                | Cutoff 2pts<br>All Delirium<br>Sens .57<br>Spec .80<br>PPV .64<br>NPV .76<br>Incident D<br>Sens .52<br>Spec .80<br>PPV .31<br>NPV .91                         | Val:<br>Incident delirium<br>Cohort 1 (MMSE)<br>0.73<br>(0.62-0.84)<br>Cohort 2- (AMTS)<br>0.70 (0.60-0.81)                                                             | <table border="1"> <tr><td>Baseline cognitive impairment</td><td>1 pt</td></tr> <tr><td>High BUN/Cr ratio</td><td>1 pt</td></tr> <tr><td>Severe illness (SIRS ≥ 2)</td><td>1 pt</td></tr> <tr><td>Vision impairment</td><td>1 pt</td></tr> </table><br>4pts=Incident delirium                                                                                                                                                                                                                                                                                                                              | Baseline cognitive impairment      | 1 pt | High BUN/Cr ratio     | 1 pt | Severe illness (SIRS ≥ 2)                                                                   | 1 pt                          | Vision impairment      | 1 pt | Original Model: MMSE <24<br><br>Modified Model: MMSE < 24<br>AMTS < 9     |      |                                       |      |                                                                                    |
| Baseline cognitive impairment                                                               | 1 pt                                   |                                                                                                               |                                                                                                                                                               |                                                                                                                                                                         |                                                                                                                                                                                                                                                                                                                                                                                                                                                                                                                                                                                                            |                                    |      |                       |      |                                                                                             |                               |                        |      |                                                                           |      |                                       |      |                                                                                    |
| High BUN/Cr ratio                                                                           | 1 pt                                   |                                                                                                               |                                                                                                                                                               |                                                                                                                                                                         |                                                                                                                                                                                                                                                                                                                                                                                                                                                                                                                                                                                                            |                                    |      |                       |      |                                                                                             |                               |                        |      |                                                                           |      |                                       |      |                                                                                    |
| Severe illness (SIRS ≥ 2)                                                                   | 1 pt                                   |                                                                                                               |                                                                                                                                                               |                                                                                                                                                                         |                                                                                                                                                                                                                                                                                                                                                                                                                                                                                                                                                                                                            |                                    |      |                       |      |                                                                                             |                               |                        |      |                                                                           |      |                                       |      |                                                                                    |
| Vision impairment                                                                           | 1 pt                                   |                                                                                                               |                                                                                                                                                               |                                                                                                                                                                         |                                                                                                                                                                                                                                                                                                                                                                                                                                                                                                                                                                                                            |                                    |      |                       |      |                                                                                             |                               |                        |      |                                                                           |      |                                       |      |                                                                                    |
| <b>Isfandiatty model</b>                                                                    | Pendlebury et al. (2016) <sup>34</sup> | Dev: 87(19)<br>Val: 95 (31)<br>Any delirium<br><br>67-prevalent<br>28-incident                                | Cutoff 4pts<br>Any Delirium<br>Sens .74<br>Spec .71<br>PPV .60<br>NPV .82<br><br>Incident Del<br>Sens .81<br>Spec .71<br>PPV .31<br>NPV .96                   | Dev: 0.82 (0.77-0.88)<br><br>Val:<br>Incident delirium<br>Cohort 1 (MMSE)<br>0.83<br>(0.74-0.91)<br>Cohort 2 (AMTS)<br>0.77<br>(0.67-0.86)                              | <table border="1"> <tr><td>Baseline cognitive impairment</td><td>3 pt</td></tr> <tr><td>Functional dependency</td><td>2 pt</td></tr> <tr><td>Infection w/sepsis</td><td>2 pt</td></tr> <tr><td>Infection w/out sepsis</td><td>1 pt</td></tr> </table><br>Weighted Score<br>Score = 7 for incident delirium<br><br>Cohort 1: MMSE<br>Cohort 2: AMTS                                                                                                                                                                                                                                                         | Baseline cognitive impairment      | 3 pt | Functional dependency | 2 pt | Infection w/sepsis                                                                          | 2 pt                          | Infection w/out sepsis | 1 pt | Original Model: Chart review<br><br>Modified Model: MMSE < 24<br>AMTS < 9 |      |                                       |      |                                                                                    |
| Baseline cognitive impairment                                                               | 3 pt                                   |                                                                                                               |                                                                                                                                                               |                                                                                                                                                                         |                                                                                                                                                                                                                                                                                                                                                                                                                                                                                                                                                                                                            |                                    |      |                       |      |                                                                                             |                               |                        |      |                                                                           |      |                                       |      |                                                                                    |
| Functional dependency                                                                       | 2 pt                                   |                                                                                                               |                                                                                                                                                               |                                                                                                                                                                         |                                                                                                                                                                                                                                                                                                                                                                                                                                                                                                                                                                                                            |                                    |      |                       |      |                                                                                             |                               |                        |      |                                                                           |      |                                       |      |                                                                                    |
| Infection w/sepsis                                                                          | 2 pt                                   |                                                                                                               |                                                                                                                                                               |                                                                                                                                                                         |                                                                                                                                                                                                                                                                                                                                                                                                                                                                                                                                                                                                            |                                    |      |                       |      |                                                                                             |                               |                        |      |                                                                           |      |                                       |      |                                                                                    |
| Infection w/out sepsis                                                                      | 1 pt                                   |                                                                                                               |                                                                                                                                                               |                                                                                                                                                                         |                                                                                                                                                                                                                                                                                                                                                                                                                                                                                                                                                                                                            |                                    |      |                       |      |                                                                                             |                               |                        |      |                                                                           |      |                                       |      |                                                                                    |
| <b>Martinez et al. 2012 model</b>                                                           | Pendlebury et al. (2016) <sup>34</sup> | 1 <sup>st</sup> Val: 76(25)<br>2 <sup>nd</sup> Val: 95(31)<br>Any delirium<br><br>67-prevalent<br>28-incident | Modified Model<br>Cutoff 2pts<br>Any Delirium<br>Sens .62<br>Spec .68<br>PPV .54<br>NPV .75<br><br>Incident Del<br>Sens .81<br>Spec .68<br>PPV .29<br>NPV .96 | 1 <sup>st</sup> Val: 0.85 (0.80-0.88)<br><br>Incident delirium<br>2 <sup>nd</sup> Val: Cohort 1 (MMSE)<br>0.78<br>(0.68-0.88)<br>Cohort 2 (AMTS)<br>0.75<br>(0.65-0.84) | Martinez et al. 2012 Original Model<br><table border="1"> <tr><td>Age &gt;85</td><td>1 pt</td></tr> <tr><td>Dependent in ≥5 ADLs</td><td>1 pt</td></tr> <tr><td>Drugs on admit:<br/>-Antidepressants<br/>-Antidementia<br/>-anticonvulsants<br/>-antipsychotics</td><td>1pt/drug<br/>2pt/<br/>antipsych</td></tr> </table><br>Score 0-3<br>Score >1 = high risk for delirium<br>Modified Model<br><table border="1"> <tr><td>Age &gt;85</td><td>1 pt</td></tr> <tr><td>Dependency in ≥ 5 ADLs</td><td>1 pt</td></tr> <tr><td>Diag of Dementia<br/>MMSE&lt;24<br/>AMTS&lt;9</td><td>1 pt</td></tr> </table> | Age >85                            | 1 pt | Dependent in ≥5 ADLs  | 1 pt | Drugs on admit:<br>-Antidepressants<br>-Antidementia<br>-anticonvulsants<br>-antipsychotics | 1pt/drug<br>2pt/<br>antipsych | Age >85                | 1 pt | Dependency in ≥ 5 ADLs                                                    | 1 pt | Diag of Dementia<br>MMSE<24<br>AMTS<9 | 1 pt | Original Model: -No cognitive measure<br><br>Modified Model: MMSE < 24<br>AMTS < 9 |
| Age >85                                                                                     | 1 pt                                   |                                                                                                               |                                                                                                                                                               |                                                                                                                                                                         |                                                                                                                                                                                                                                                                                                                                                                                                                                                                                                                                                                                                            |                                    |      |                       |      |                                                                                             |                               |                        |      |                                                                           |      |                                       |      |                                                                                    |
| Dependent in ≥5 ADLs                                                                        | 1 pt                                   |                                                                                                               |                                                                                                                                                               |                                                                                                                                                                         |                                                                                                                                                                                                                                                                                                                                                                                                                                                                                                                                                                                                            |                                    |      |                       |      |                                                                                             |                               |                        |      |                                                                           |      |                                       |      |                                                                                    |
| Drugs on admit:<br>-Antidepressants<br>-Antidementia<br>-anticonvulsants<br>-antipsychotics | 1pt/drug<br>2pt/<br>antipsych          |                                                                                                               |                                                                                                                                                               |                                                                                                                                                                         |                                                                                                                                                                                                                                                                                                                                                                                                                                                                                                                                                                                                            |                                    |      |                       |      |                                                                                             |                               |                        |      |                                                                           |      |                                       |      |                                                                                    |
| Age >85                                                                                     | 1 pt                                   |                                                                                                               |                                                                                                                                                               |                                                                                                                                                                         |                                                                                                                                                                                                                                                                                                                                                                                                                                                                                                                                                                                                            |                                    |      |                       |      |                                                                                             |                               |                        |      |                                                                           |      |                                       |      |                                                                                    |
| Dependency in ≥ 5 ADLs                                                                      | 1 pt                                   |                                                                                                               |                                                                                                                                                               |                                                                                                                                                                         |                                                                                                                                                                                                                                                                                                                                                                                                                                                                                                                                                                                                            |                                    |      |                       |      |                                                                                             |                               |                        |      |                                                                           |      |                                       |      |                                                                                    |
| Diag of Dementia<br>MMSE<24<br>AMTS<9                                                       | 1 pt                                   |                                                                                                               |                                                                                                                                                               |                                                                                                                                                                         |                                                                                                                                                                                                                                                                                                                                                                                                                                                                                                                                                                                                            |                                    |      |                       |      |                                                                                             |                               |                        |      |                                                                           |      |                                       |      |                                                                                    |



| <b>Pompei et al. 1994 model</b>     | Pompei et al. (1994) <sup>44</sup>          | Dev: 64(15)<br>Val: 86(26)<br><br>(21=prevalent delirium) | Sens .83<br>Spec .50<br>PPV .38<br>NPV .89<br><br>*Pts stratified as low or moderate to high-risk | Dev: 0.74<br>+/- 0.05<br>Val: 0.64<br>+/- 0.05 | <table border="1"> <thead> <tr> <th colspan="2">Weighted Points</th> </tr> </thead> <tbody> <tr> <td>Baseline cognitive impairment</td> <td>2 pt</td> </tr> <tr> <td>Depression</td> <td>2 pt</td> </tr> <tr> <td>Alcoholism</td> <td>3 pt</td> </tr> <tr> <td>≥ 4 comorbidities</td> <td>3 pt</td> </tr> </tbody> </table> <p>0-3 pts = Low risk<br/>4-7 pts = Moderate risk<br/>8-10 pts = High risk</p>                                                                                                                                                                                                                                                                                                                                                                                                                                                                                                                  | Weighted Points        |      | Baseline cognitive impairment     | 2 pt | Depression           | 2 pt | Alcoholism              | 3 pt | ≥ 4 comorbidities    | 3 pt | MMSE<br>Less than HS <21<br>High school <23<br>College edu < 24 |      |     |  |                     |      |             |      |                  |      |                 |      |                |  |                   |     |                  |     |                                    |      |                  |      |                                                                        |
|-------------------------------------|---------------------------------------------|-----------------------------------------------------------|---------------------------------------------------------------------------------------------------|------------------------------------------------|-----------------------------------------------------------------------------------------------------------------------------------------------------------------------------------------------------------------------------------------------------------------------------------------------------------------------------------------------------------------------------------------------------------------------------------------------------------------------------------------------------------------------------------------------------------------------------------------------------------------------------------------------------------------------------------------------------------------------------------------------------------------------------------------------------------------------------------------------------------------------------------------------------------------------------|------------------------|------|-----------------------------------|------|----------------------|------|-------------------------|------|----------------------|------|-----------------------------------------------------------------|------|-----|--|---------------------|------|-------------|------|------------------|------|-----------------|------|----------------|--|-------------------|-----|------------------|-----|------------------------------------|------|------------------|------|------------------------------------------------------------------------|
| Weighted Points                     |                                             |                                                           |                                                                                                   |                                                |                                                                                                                                                                                                                                                                                                                                                                                                                                                                                                                                                                                                                                                                                                                                                                                                                                                                                                                             |                        |      |                                   |      |                      |      |                         |      |                      |      |                                                                 |      |     |  |                     |      |             |      |                  |      |                 |      |                |  |                   |     |                  |     |                                    |      |                  |      |                                                                        |
| Baseline cognitive impairment       | 2 pt                                        |                                                           |                                                                                                   |                                                |                                                                                                                                                                                                                                                                                                                                                                                                                                                                                                                                                                                                                                                                                                                                                                                                                                                                                                                             |                        |      |                                   |      |                      |      |                         |      |                      |      |                                                                 |      |     |  |                     |      |             |      |                  |      |                 |      |                |  |                   |     |                  |     |                                    |      |                  |      |                                                                        |
| Depression                          | 2 pt                                        |                                                           |                                                                                                   |                                                |                                                                                                                                                                                                                                                                                                                                                                                                                                                                                                                                                                                                                                                                                                                                                                                                                                                                                                                             |                        |      |                                   |      |                      |      |                         |      |                      |      |                                                                 |      |     |  |                     |      |             |      |                  |      |                 |      |                |  |                   |     |                  |     |                                    |      |                  |      |                                                                        |
| Alcoholism                          | 3 pt                                        |                                                           |                                                                                                   |                                                |                                                                                                                                                                                                                                                                                                                                                                                                                                                                                                                                                                                                                                                                                                                                                                                                                                                                                                                             |                        |      |                                   |      |                      |      |                         |      |                      |      |                                                                 |      |     |  |                     |      |             |      |                  |      |                 |      |                |  |                   |     |                  |     |                                    |      |                  |      |                                                                        |
| ≥ 4 comorbidities                   | 3 pt                                        |                                                           |                                                                                                   |                                                |                                                                                                                                                                                                                                                                                                                                                                                                                                                                                                                                                                                                                                                                                                                                                                                                                                                                                                                             |                        |      |                                   |      |                      |      |                         |      |                      |      |                                                                 |      |     |  |                     |      |             |      |                  |      |                 |      |                |  |                   |     |                  |     |                                    |      |                  |      |                                                                        |
| <b>Precipitating Risk Factors</b>   | Inouye and Charpentier (1996) <sup>30</sup> | Dev: 35(18)<br>Val: 47(15)<br><br>(incident delirium)     | Not reported                                                                                      | No AUROC reported                              | <table border="1"> <tbody> <tr> <td>Physical restraint use</td> <td>1 pt</td> </tr> <tr> <td>Malnutrition</td> <td>1 pt</td> </tr> <tr> <td>≥3 medications added</td> <td>1 pt</td> </tr> <tr> <td>Bladder catheterization</td> <td>1 pt</td> </tr> <tr> <td>Any iatrogenic event</td> <td>1 pt</td> </tr> </tbody> </table> <p>Not weighted.<br/>0 pt = Low Risk<br/>1-2 pt = Intermediate<br/>≥ 3 pt = High Risk</p>                                                                                                                                                                                                                                                                                                                                                                                                                                                                                                      | Physical restraint use | 1 pt | Malnutrition                      | 1 pt | ≥3 medications added | 1 pt | Bladder catheterization | 1 pt | Any iatrogenic event | 1 pt | None used in model                                              |      |     |  |                     |      |             |      |                  |      |                 |      |                |  |                   |     |                  |     |                                    |      |                  |      |                                                                        |
| Physical restraint use              | 1 pt                                        |                                                           |                                                                                                   |                                                |                                                                                                                                                                                                                                                                                                                                                                                                                                                                                                                                                                                                                                                                                                                                                                                                                                                                                                                             |                        |      |                                   |      |                      |      |                         |      |                      |      |                                                                 |      |     |  |                     |      |             |      |                  |      |                 |      |                |  |                   |     |                  |     |                                    |      |                  |      |                                                                        |
| Malnutrition                        | 1 pt                                        |                                                           |                                                                                                   |                                                |                                                                                                                                                                                                                                                                                                                                                                                                                                                                                                                                                                                                                                                                                                                                                                                                                                                                                                                             |                        |      |                                   |      |                      |      |                         |      |                      |      |                                                                 |      |     |  |                     |      |             |      |                  |      |                 |      |                |  |                   |     |                  |     |                                    |      |                  |      |                                                                        |
| ≥3 medications added                | 1 pt                                        |                                                           |                                                                                                   |                                                |                                                                                                                                                                                                                                                                                                                                                                                                                                                                                                                                                                                                                                                                                                                                                                                                                                                                                                                             |                        |      |                                   |      |                      |      |                         |      |                      |      |                                                                 |      |     |  |                     |      |             |      |                  |      |                 |      |                |  |                   |     |                  |     |                                    |      |                  |      |                                                                        |
| Bladder catheterization             | 1 pt                                        |                                                           |                                                                                                   |                                                |                                                                                                                                                                                                                                                                                                                                                                                                                                                                                                                                                                                                                                                                                                                                                                                                                                                                                                                             |                        |      |                                   |      |                      |      |                         |      |                      |      |                                                                 |      |     |  |                     |      |             |      |                  |      |                 |      |                |  |                   |     |                  |     |                                    |      |                  |      |                                                                        |
| Any iatrogenic event                | 1 pt                                        |                                                           |                                                                                                   |                                                |                                                                                                                                                                                                                                                                                                                                                                                                                                                                                                                                                                                                                                                                                                                                                                                                                                                                                                                             |                        |      |                                   |      |                      |      |                         |      |                      |      |                                                                 |      |     |  |                     |      |             |      |                  |      |                 |      |                |  |                   |     |                  |     |                                    |      |                  |      |                                                                        |
| <b>Risk Model for Delirium (RD)</b> | Moerman et al. (2012) <sup>42</sup>         | Val: 102(27)<br><br>(incident delirium)                   | Sens .81<br>Spec .56<br>PPV .41<br>NPV .89<br><br>Optimal cut-off score:<br>4 pts                 | Val: 0.73<br>(0.68-0.77)                       | <table border="1"> <thead> <tr> <th colspan="2">Weighted Points</th> </tr> </thead> <tbody> <tr> <td>Delirium-previous hospitalization</td> <td>5 pt</td> </tr> <tr> <td>Dementia</td> <td>5 pt</td> </tr> <tr> <td>Clock Drawing</td> <td></td> </tr> <tr> <td>-Sm mistake</td> <td>1 pt</td> </tr> <tr> <td>-big mistake</td> <td>2 pt</td> </tr> <tr> <td>Age</td> <td></td> </tr> <tr> <td>-70 to 85 years old</td> <td>1 pt</td> </tr> <tr> <td>- &gt;85 years</td> <td>2 pt</td> </tr> <tr> <td>Impaired hearing</td> <td>1 pt</td> </tr> <tr> <td>Impaired vision</td> <td>1 pt</td> </tr> <tr> <td>Problems w/ADL</td> <td></td> </tr> <tr> <td>-Help w/meal prep</td> <td>.5p</td> </tr> <tr> <td>-help w/physical</td> <td>.5p</td> </tr> <tr> <td>Use of heroin, methadone, morphine</td> <td>2 pt</td> </tr> <tr> <td>Daily &gt;4 alcohol</td> <td>2 pt</td> </tr> </tbody> </table> <p>≥ 5 pts = High risk</p> | Weighted Points        |      | Delirium-previous hospitalization | 5 pt | Dementia             | 5 pt | Clock Drawing           |      | -Sm mistake          | 1 pt | -big mistake                                                    | 2 pt | Age |  | -70 to 85 years old | 1 pt | - >85 years | 2 pt | Impaired hearing | 1 pt | Impaired vision | 1 pt | Problems w/ADL |  | -Help w/meal prep | .5p | -help w/physical | .5p | Use of heroin, methadone, morphine | 2 pt | Daily >4 alcohol | 2 pt | CDT<br>-11:10<br>-Two Categories<br>1 Small mistakes<br>2 Big mistakes |
| Weighted Points                     |                                             |                                                           |                                                                                                   |                                                |                                                                                                                                                                                                                                                                                                                                                                                                                                                                                                                                                                                                                                                                                                                                                                                                                                                                                                                             |                        |      |                                   |      |                      |      |                         |      |                      |      |                                                                 |      |     |  |                     |      |             |      |                  |      |                 |      |                |  |                   |     |                  |     |                                    |      |                  |      |                                                                        |
| Delirium-previous hospitalization   | 5 pt                                        |                                                           |                                                                                                   |                                                |                                                                                                                                                                                                                                                                                                                                                                                                                                                                                                                                                                                                                                                                                                                                                                                                                                                                                                                             |                        |      |                                   |      |                      |      |                         |      |                      |      |                                                                 |      |     |  |                     |      |             |      |                  |      |                 |      |                |  |                   |     |                  |     |                                    |      |                  |      |                                                                        |
| Dementia                            | 5 pt                                        |                                                           |                                                                                                   |                                                |                                                                                                                                                                                                                                                                                                                                                                                                                                                                                                                                                                                                                                                                                                                                                                                                                                                                                                                             |                        |      |                                   |      |                      |      |                         |      |                      |      |                                                                 |      |     |  |                     |      |             |      |                  |      |                 |      |                |  |                   |     |                  |     |                                    |      |                  |      |                                                                        |
| Clock Drawing                       |                                             |                                                           |                                                                                                   |                                                |                                                                                                                                                                                                                                                                                                                                                                                                                                                                                                                                                                                                                                                                                                                                                                                                                                                                                                                             |                        |      |                                   |      |                      |      |                         |      |                      |      |                                                                 |      |     |  |                     |      |             |      |                  |      |                 |      |                |  |                   |     |                  |     |                                    |      |                  |      |                                                                        |
| -Sm mistake                         | 1 pt                                        |                                                           |                                                                                                   |                                                |                                                                                                                                                                                                                                                                                                                                                                                                                                                                                                                                                                                                                                                                                                                                                                                                                                                                                                                             |                        |      |                                   |      |                      |      |                         |      |                      |      |                                                                 |      |     |  |                     |      |             |      |                  |      |                 |      |                |  |                   |     |                  |     |                                    |      |                  |      |                                                                        |
| -big mistake                        | 2 pt                                        |                                                           |                                                                                                   |                                                |                                                                                                                                                                                                                                                                                                                                                                                                                                                                                                                                                                                                                                                                                                                                                                                                                                                                                                                             |                        |      |                                   |      |                      |      |                         |      |                      |      |                                                                 |      |     |  |                     |      |             |      |                  |      |                 |      |                |  |                   |     |                  |     |                                    |      |                  |      |                                                                        |
| Age                                 |                                             |                                                           |                                                                                                   |                                                |                                                                                                                                                                                                                                                                                                                                                                                                                                                                                                                                                                                                                                                                                                                                                                                                                                                                                                                             |                        |      |                                   |      |                      |      |                         |      |                      |      |                                                                 |      |     |  |                     |      |             |      |                  |      |                 |      |                |  |                   |     |                  |     |                                    |      |                  |      |                                                                        |
| -70 to 85 years old                 | 1 pt                                        |                                                           |                                                                                                   |                                                |                                                                                                                                                                                                                                                                                                                                                                                                                                                                                                                                                                                                                                                                                                                                                                                                                                                                                                                             |                        |      |                                   |      |                      |      |                         |      |                      |      |                                                                 |      |     |  |                     |      |             |      |                  |      |                 |      |                |  |                   |     |                  |     |                                    |      |                  |      |                                                                        |
| - >85 years                         | 2 pt                                        |                                                           |                                                                                                   |                                                |                                                                                                                                                                                                                                                                                                                                                                                                                                                                                                                                                                                                                                                                                                                                                                                                                                                                                                                             |                        |      |                                   |      |                      |      |                         |      |                      |      |                                                                 |      |     |  |                     |      |             |      |                  |      |                 |      |                |  |                   |     |                  |     |                                    |      |                  |      |                                                                        |
| Impaired hearing                    | 1 pt                                        |                                                           |                                                                                                   |                                                |                                                                                                                                                                                                                                                                                                                                                                                                                                                                                                                                                                                                                                                                                                                                                                                                                                                                                                                             |                        |      |                                   |      |                      |      |                         |      |                      |      |                                                                 |      |     |  |                     |      |             |      |                  |      |                 |      |                |  |                   |     |                  |     |                                    |      |                  |      |                                                                        |
| Impaired vision                     | 1 pt                                        |                                                           |                                                                                                   |                                                |                                                                                                                                                                                                                                                                                                                                                                                                                                                                                                                                                                                                                                                                                                                                                                                                                                                                                                                             |                        |      |                                   |      |                      |      |                         |      |                      |      |                                                                 |      |     |  |                     |      |             |      |                  |      |                 |      |                |  |                   |     |                  |     |                                    |      |                  |      |                                                                        |
| Problems w/ADL                      |                                             |                                                           |                                                                                                   |                                                |                                                                                                                                                                                                                                                                                                                                                                                                                                                                                                                                                                                                                                                                                                                                                                                                                                                                                                                             |                        |      |                                   |      |                      |      |                         |      |                      |      |                                                                 |      |     |  |                     |      |             |      |                  |      |                 |      |                |  |                   |     |                  |     |                                    |      |                  |      |                                                                        |
| -Help w/meal prep                   | .5p                                         |                                                           |                                                                                                   |                                                |                                                                                                                                                                                                                                                                                                                                                                                                                                                                                                                                                                                                                                                                                                                                                                                                                                                                                                                             |                        |      |                                   |      |                      |      |                         |      |                      |      |                                                                 |      |     |  |                     |      |             |      |                  |      |                 |      |                |  |                   |     |                  |     |                                    |      |                  |      |                                                                        |
| -help w/physical                    | .5p                                         |                                                           |                                                                                                   |                                                |                                                                                                                                                                                                                                                                                                                                                                                                                                                                                                                                                                                                                                                                                                                                                                                                                                                                                                                             |                        |      |                                   |      |                      |      |                         |      |                      |      |                                                                 |      |     |  |                     |      |             |      |                  |      |                 |      |                |  |                   |     |                  |     |                                    |      |                  |      |                                                                        |
| Use of heroin, methadone, morphine  | 2 pt                                        |                                                           |                                                                                                   |                                                |                                                                                                                                                                                                                                                                                                                                                                                                                                                                                                                                                                                                                                                                                                                                                                                                                                                                                                                             |                        |      |                                   |      |                      |      |                         |      |                      |      |                                                                 |      |     |  |                     |      |             |      |                  |      |                 |      |                |  |                   |     |                  |     |                                    |      |                  |      |                                                                        |
| Daily >4 alcohol                    | 2 pt                                        |                                                           |                                                                                                   |                                                |                                                                                                                                                                                                                                                                                                                                                                                                                                                                                                                                                                                                                                                                                                                                                                                                                                                                                                                             |                        |      |                                   |      |                      |      |                         |      |                      |      |                                                                 |      |     |  |                     |      |             |      |                  |      |                 |      |                |  |                   |     |                  |     |                                    |      |                  |      |                                                                        |

**Key:**

Dev=Development, Val=Validation

Sens=Sensitivity, Spec=Specificity, PPV=Positive Predictive Value, NPV=Negative Predictive Value

Area Under the Receiver Operating Curve Statistic, Dev=Development, Val=Validation, mRASS=Modified Richmond Agitation-Sedation Scale, TMTYB=The Months of the Year Backwards

ADL=Activities of Daily Living

MMSE=Mini Mental Status Exam, AMTS=Abbreviated Mental Test Score, CDT=Clock Drawing Test, mBDR=Modified Blessed Dementia Rating, MoCA=Montreal Cognitive Assessment.

**Predictive ability**

Reported AUROC in externally validated delirium prediction models ranged from 0.52-0.94

(Figure three). Five models attained an AUROC above 0.75 indicating potential clinical

1  
2  
3 relevance and moderate predictive ability.<sup>22 32 34</sup> Of these five models, the highest performing  
4 model (AUROC 0.94, CI 0.91-0.97) was developed and validated in a surgical population.<sup>34</sup>  
5 Carrasco et al. (2014) was developed and validated in a medical population (AUROC 0.78, CI  
6 0.66-0.90).<sup>22</sup> The remaining three models were developed in separate medical cohort  
7 populations<sup>24 31 39</sup> but, were externally validated within the same cohort of medical patients and  
8 modified to share similar variable measures of cognition, functional status and illness severity  
9 (AUROC 0.78-0.83).<sup>32</sup> These five models share similarities with variable use, as seen in Figure  
10 two.  
11  
12  
13  
14  
15  
16  
17  
18  
19  
20

### 21 **Model calibration**

22  
23 Four of the thirteen externally validated delirium prediction models reported calibration  
24 metrics.<sup>28 29 33 44</sup> The reported chi-square statistics were significant in three models<sup>28 29 33</sup> and did  
25 not reach significance in one model.<sup>44</sup> None of the included studies reported Hosmer-Lemeshow  
26 test statistics, calibration plots or slopes.  
27  
28  
29  
30  
31

### 32 **Risk of overfitting**

33  
34 Events per variable (EPV) were examined in each of the thirteen externally validated models.  
35 Models estimating more parameters than events in a 1:10 ratio are at risk of statistical  
36 overfitting.<sup>15 49 50</sup> In 13 models with external validation, four had fewer than optimum events for  
37 the number of parameters estimated in the development stage of the models.<sup>24 28 29 47</sup> Five had  
38 fewer than optimum events in the external validation stage.<sup>22 28-30 44</sup> Two models did not reach  
39 optimum events for the number of parameters in either the development or the external  
40 validation studies.<sup>28 29</sup> Of the five models with an AUROC greater than 0.75, one of these models  
41 did not obtain sufficient EPV in the development stage<sup>24</sup> and another did not attain sufficient  
42 EPV in the external validation study, likely impacting the model's predictive ability  
43  
44  
45  
46  
47  
48  
49  
50  
51  
52  
53  
54  
55  
56  
57  
58  
59  
60

1  
2  
3 (development – AUROC 0.86, CI-0.82-0.91, external validation – AUROC 0.78, CI-0.66-  
4  
5 0.90).<sup>22</sup>  
6

## 7 **DISCUSSION**

8  
9  
10 This review identified moderate predictive ability in five of the thirteen externally validated  
11 delirium prediction models, however, three main limitations were identified. First, assessment of  
12 the outcome variable, delirium, was largely non-systematic, once daily, and avoided weekends.  
13  
14 This is a major limitation for an acute condition that fluctuates and may occur suddenly. In the  
15 highest performing model, a major limitation was identified: data collection overlapped with the  
16 initial diagnosis of delirium, likely exaggerating model performance.<sup>15 34</sup> Second, model  
17 performance may be influenced by inadequate EPV leading to statistical overfitting and  
18 exaggerated model performance. Overall reporting of model performance measures was  
19 inconsistent with only four models reporting calibration statistics. Finally, variable definition  
20 was heterogeneous and often indistinct, making comparisons between models difficult and  
21 decreasing the ability to generalise models across populations. Further, broad variable  
22 definitions, particularly in functional and cognitive abilities, may have led to overlapping data  
23 capture. Pendlebury et al. (2016) facilitated comparisons between three of the moderately  
24 performing models by externally validating these in the same cohort.<sup>32</sup> These models were re-  
25 developed to best fit the validation cohort. While this provides an opportunity to compare  
26 models, it is not known how these models will generalise to subsequent patient populations. Re-  
27 development is not equal to model validation.<sup>15</sup> Taken together, these findings suggest that  
28 current delirium prediction is limited by moderately performing, heterogeneous, non-  
29 generalizable models that may be improved with the application of frequent, systematic delirium  
30 assessments and the use of applicable statistical methods to evaluate and build clinical prediction  
31  
32  
33  
34  
35  
36  
37  
38  
39  
40  
41  
42  
43  
44  
45  
46  
47  
48  
49  
50  
51  
52  
53  
54  
55  
56  
57  
58  
59  
60

1  
2  
3 models.

4  
5 As delirium is a multifactorial syndrome representing an interrelationship between premorbid  
6 and precipitating factors,<sup>28</sup> the time course of data collection is important. Eight of the thirteen  
7 externally validated delirium prediction models incorporate precipitating factors into their  
8 predictive model; two models<sup>28 30</sup> are intentionally constructed in this manner. The inclusion of  
9 a precipitating factor into a premorbid delirium prediction model may provide important  
10 predictive power if designed in the appropriate manner, as demonstrated by Inouye et al (1993).<sup>29</sup>  
11  
12 However, if variables are collected after the onset of delirium this would exaggerate model  
13 performance (e.g. ICU admission). As an example, one delirium prediction model has a robust  
14 AUROC of 0.94 (CI 0.91-0.97).<sup>34</sup> This study excluded those with a MMSE <23 and prevalent  
15 delirium. Data collection occurred within the first 24-hours following surgery, however, delirium  
16 assessment began immediately after surgery, with a 50% delirium prevalence on the day of  
17 surgery. This overlap of data collection and delirium assessment likely exaggerated model  
18 performance for this outlier study. The remaining three models with AUROCs greater than 0.75  
19 included data about the precipitating factor present upon admission and either excluded those  
20 with prevalent delirium or calculated separate AUROCs for prevalent delirium versus incident  
21 delirium.  
22  
23  
24  
25  
26  
27  
28  
29  
30  
31  
32  
33  
34  
35  
36  
37  
38  
39  
40  
41

42 Model underperformance may be explained through low powered studies leading to insufficient  
43 events per variable (EPV) resulting in statistical overfitting.<sup>49 50</sup> As overfitting of a model leads  
44 to an underestimation of event probability in low risk patients and overstates the probability in  
45 high risk patients, it is an important consideration when evaluating the predictive performance of  
46 delirium prediction models.<sup>51</sup> This effect is highlighted in the Carrasco et al.(2014) model as the  
47 AUROC decreased from the development study (0.82) to the external validation study (0.78).  
48  
49  
50  
51  
52  
53  
54  
55  
56  
57  
58  
59  
60

1  
2  
3 Future studies should attain adequate EPV to avoid overfitting. Further, past models validated  
4  
5 with insufficient EPV should be interpreted with caution.  
6

7  
8 The identified studies largely used univariate or bivariate analysis then stepwise logistic  
9  
10 regression to develop the delirium prediction models. Although these are common methods to  
11  
12 use for model development and may counter the effects of insufficient EPV, each approach has  
13  
14 significant drawbacks.<sup>51</sup> Univariate analysis may reduce predictive ability by inclusion of  
15  
16 variables that are not independent of each other, and stepwise regression disadvantages include  
17  
18 conflation of *p*-values and a biased estimation of coefficients.<sup>21 52</sup> Statistical methods to counter  
19  
20 low EPV could include penalised regression using either ridge or lasso regression and  
21  
22 bootstrapping.<sup>21 51</sup>  
23  
24

25  
26 Increasing age, pre-existing cognitive impairment, functional and sensory impairments were the  
27  
28 most frequently used variables in the externally validated delirium prediction models. However,  
29  
30 many studies employed different definition for these variables, making comparisons difficult  
31  
32 between models and limiting generalisability across populations. Functional and physical  
33  
34 impairments were broadly defined resulting in the inability to discern whether impairments  
35  
36 resulted from truly physical origins or if the noted decrease in function was related to cognitive  
37  
38 impairment leading to an overlap in data collection. Interestingly, these variables were also not  
39  
40 consistently included in the five highest performing delirium prediction models, questioning their  
41  
42 potential role in delirium prediction. Age may not be a relevant risk factor when considering an  
43  
44 older cohort of patients; for example, a recent study found that global cognition may mediate the  
45  
46 relationship between age and postoperative delirium<sup>53</sup> therefore the inclusion of age in a delirium  
47  
48 prediction model may not add to the overall performance of the model if cognition is adequately  
49  
50 captured or if only elderly patients are included in the study.  
51  
52  
53  
54  
55  
56  
57  
58  
59  
60

1  
2  
3 The highest performing delirium prediction model excluded those with pre-existing cognitive  
4 impairment, did not incorporate a cognitive variable and used hearing impairment as a predictive  
5 variable (note the methodological concerns of this study were discussed above).<sup>34</sup> Cognitive  
6 impairment was the most frequently used variable and is a known risk factor for delirium  
7 development.<sup>2 53</sup> Prior research demonstrates individuals with Mild Cognitive Impairment (MCI)  
8 are at a significantly higher risk of delirium development.<sup>54 55</sup> All models used cut-off scores on  
9 cognitive tests that would indicate dementia, providing no evaluation of subtler cognitive decline  
10 such as MCI. Furthermore, Jones et al. (2016) demonstrated a strong linear relationship between  
11 risk of delirium and all levels of cognitive function, even those considered unimpaired through  
12 formal testing.<sup>53</sup> In this study, a General Cognitive Performance score was developed using a  
13 complex battery of neuropsychological tests. Unfortunately, the neuropsychological battery is  
14 too complex to be practical for the clinical setting. Fong et al. (2015) found associations between  
15 baseline executive functioning, complex attention and semantic networks to be associated with  
16 subsequent delirium development<sup>56</sup>. The inclusion of MCI, or simple cognitive tests as employed  
17 by Fong et al. (2015), as a variable may increase the detection and prevalence of cognitive  
18 impairment as a variable thus increasing its predictive power. Further exploration into isolated  
19 cognitive tests that are feasible to administer in a clinical setting as well as sensitive to the  
20 spectrum of cognitive impairment may enhance delirium prediction.

21  
22  
23  
24  
25  
26  
27  
28  
29  
30  
31  
32  
33  
34  
35  
36  
37  
38  
39  
40  
41  
42  
43  
44  
45 Four of the best-performing models contained a measurement of functional or physical  
46 impairment.<sup>22 32 34</sup> This measurement may be representative of numerous underlying factors  
47 working to inhibit a biological compensatory mechanism and serve as a marker for a vulnerable  
48 individual.<sup>57 58</sup> Carrasco et al. (2014) used the Barthel Index, which evaluates basic functioning  
49 in ten different areas. A proxy completed this measure instead of self-report which has been  
50  
51  
52  
53  
54  
55  
56  
57  
58  
59  
60

1  
2  
3 shown to improve accuracy.<sup>59</sup> Kim et al. (2016) did not report use of a standardized  
4 measurement tool, but defined impaired physical status as the inability to be self-sufficient.  
5  
6 Pendlebury et al. (2016) defined functional impairment as an individual residing in a care home  
7 or receiving care at their home and applied this definition in two of the four models validated  
8 within that patient cohort. These broad definitions lead to the inability to discern whether the  
9 functional impairment was due to a physical or cognitive mechanism.  
10  
11  
12  
13  
14  
15

### 16 17 **Strengths and weaknesses of this study**

18  
19 This systematic review benefitted from a prospectively developed protocol. A comprehensive  
20 literature search from multiple databases using broad search terms yielded twenty-seven studies  
21 with thirteen externally validated delirium prediction models. Our author team is  
22 interprofessional, providing the opportunity for different perspectives on model evaluation.  
23  
24 Further, this review synthesizes evidence from both medical and surgical populations while  
25 providing statistical-based recommendations for study and model design for future delirium  
26 prediction model studies.  
27  
28  
29  
30  
31  
32  
33  
34

35 The limitations of this systematic review may be that articles focused on a younger population  
36 were not included along with studies identifying predictive risk factors, not exclusively  
37 predictive models. This limitation could narrow the generalisability of the results of this  
38 systematic review to the broader population however delirium predominantly affects older  
39 adults.  
40  
41  
42  
43  
44  
45

### 46 47 **Strengths and weaknesses in relation to other studies**

48  
49 Past systematic reviews concluded that the identified delirium prediction models were largely  
50 heterogeneous in variable inclusion and were not sufficiently developed for incorporation into  
51 practice.<sup>60-62</sup> Recommendations include further testing on existing delirium prediction models  
52  
53  
54  
55  
56  
57  
58  
59  
60

1  
2  
3 followed by integration in practice as well as further exploration into measurements that are  
4 feasible clinically. This review included eight models not previously identified in past systematic  
5 reviews of delirium prediction models. Further this review is the first to identify study and  
6 model design issues and discusses the paucity of measurements sensitive to the spectrum of  
7 cognitive impairment.  
8  
9  
10  
11  
12  
13

### 14 **Implications and future research**

15  
16  
17 Future studies should focus on the development and validation of delirium prediction models  
18 using the following broad principles: (1) Delirium prediction models should be developed only  
19 using data available prior to the onset of delirium and likely should be focused in specific  
20 populations depending on whether the precipitating event has occurred or not; (2) should explore  
21 the use of further cognitive variables to enhance current model performance and should  
22 distinguish functional impairment due to physical conditions, cognitive impairment or both, (3)  
23 should include structured, twice daily assessment (regardless of weekends) using validated tools  
24 and trained research staff to identify delirium, (4) adhere to strict guidelines for both statistical  
25 methodology and metric reporting, (5) Delirium prediction model variables should have  
26 sufficient prevalence along with the number of events within the population studied to optimize  
27 model performance and (6) consider development of dynamic predictive models using AI  
28 methods and machine learning. In addition, rigorous statistical methods would improve the  
29 development and validation of models and avoid issues of under and overfitting of models. An  
30 example of this would be to employ Akaike Information Criterion (AIC) or Bayesian  
31 Information Criterion (BIC) in stepwise selection. This would avoid exclusion of variables that  
32 may not be statistically significant in standard hypothesis testing, yet may yield important  
33 variable prediction in model estimations.<sup>21</sup> Standardized metric reporting would augment model  
34  
35  
36  
37  
38  
39  
40  
41  
42  
43  
44  
45  
46  
47  
48  
49  
50  
51  
52  
53  
54  
55  
56  
57  
58  
59  
60



1  
2  
3 development and validation, facilitating the ability to compare model across populations and  
4 settings. Recommendations for future statistical reporting of delirium prediction models include  
5 sensitivity, specificity, positive predictive value, negative predictive value, Nagelkerke's  $R^2$ , area  
6 under the receiver operating curve (AUROC), and goodness-of-fit measures. Further, calculating  
7 and reporting statistical metrics on the calibration and clinical usefulness of models would  
8 benefit delirium prediction.<sup>21</sup>

9  
10  
11  
12  
13  
14  
15  
16  
17 Two classes of delirium prediction models may be required, based on the acuity of the admission  
18 (elective or emergency). If precipitating factors are included in an elective admission delirium  
19 prediction model, where the patient is yet to incur the delirium provoking event, an individual's  
20 delirium risk may be overestimated. In the second option, inclusion of only premorbid factors  
21 may underestimate delirium risk given the emergency clinical scenario.

## 22 23 24 25 26 27 28 **Conclusion**

29  
30  
31 Twenty-three delirium prediction models were identified. Thirteen of these were externally  
32 validated and three were internally validated. Of the thirteen validated delirium prediction  
33 models, the overall predictive ability is moderate with only five models achieving an AUROC  
34 above 0.75.<sup>22 32 34</sup> Assessment of the outcome variable, delirium, is often non-systematic and  
35 future studies would be improved with more standardized and frequent assessment. Overall, the  
36 variable inclusion and applied definitions in delirium prediction models are heterogeneous  
37 making comparisons difficult. To improve delirium prediction models, future models should  
38 consider using standard variables and definitions to work towards a prediction tool that is  
39 generalizable to several populations within the remit of understanding the relationship with the  
40 precipitating event.

## 41 42 43 44 45 46 47 48 49 50 51 52 53 **Contributors**

1  
2  
3 HL and SP with the mentorship of RDS formulated the aim, developed the study protocol,  
4 completed the search and extracted the data. HL and RDS synthesized the data. HL with the  
5 mentorship of RDS drafted the manuscript and designed the tables. RB designed the figures and  
6 assisted with statistical interpretation. LB provided expertise on content related to cognition and  
7 reviewed the manuscript. DD and CMC assisted with synthesis and interpretation of results and  
8 discussion in relation to their expertise in geriatrics, cognition, and delirium. MC, MM, MTVC,  
9 and PP assisted with synthesis of results and discussion section, providing expertise in delirium  
10 in its respective settings.  
11  
12  
13  
14  
15  
16  
17  
18  
19  
20

### 21 **Declaration of Interests**

22 All authors have completed ICMJE disclosure forms and no conflicts of interest are declared.  
23

### 24 **Acknowledgements**

25 HL and RDS acknowledge funding support from the Department of Anesthesiology at University  
26 of Wisconsin-Madison. PP acknowledges funding support from R01 NHLBI (HL111111) and  
27 research grant from Hospira Inc. in collaboration with NIH. We would like to express our  
28 sincere gratitude for the assistance of Mary Hitchcock in Ebling Health Sciences Library in the  
29 design of the search strategy and Dave Dwyer and Lily Turner for their assistance with  
30 proofreading the manuscript.  
31  
32  
33  
34  
35  
36  
37  
38  
39  
40  
41  
42  
43  
44  
45  
46  
47  
48  
49  
50  
51  
52  
53  
54  
55  
56  
57  
58  
59  
60

## References

1. Sanders RD, Pandharipande PP, Davidson AJ, et al. Anticipating and managing postoperative delirium and cognitive decline in adults. *BMJ: British Medical Journal (Overseas & Retired Doctors Edition)* 2011;343(7816):197-200 4p. doi: 10.1136/bmj.d4331
2. Inouye SK, Westendorp RG, Saczynski JS. Delirium in elderly people. *Lancet* 2014;383(9920):911-22. doi: 10.1016/s0140-6736(13)60688-1  
10.1016/S0140-6736(13)60688-1. Epub 2013 Aug 28.
3. Ryan DJ, O'Regan NA, Caoimh RÓ, et al. Delirium in an adult acute hospital population: predictors, prevalence and detection. *BMJ Open* 2013;3(1) doi: 10.1136/bmjopen-2012-001772
4. Pandharipande PP, Girard TD, Jackson JC, et al. Long-Term Cognitive Impairment after Critical Illness. *The New England Journal Of Medicine* 2013;369(14):1306-16. doi: 10.1056/NEJMoa1301372

- 1  
2  
3 5. Leslie DL, Inouye SK. The importance of delirium: economic and societal costs. *Journal of*  
4  
5 *the American Geriatrics Society* 2011;59 Suppl 2:S241-3. doi: 10.1111/j.1532-  
6  
7 5415.2011.03671.x [published Online First: 2011/12/07]  
8  
9
- 10 6. Han JH, Brummel NE, Chandrasekhar R, et al. Exploring Delirium's Heterogeneity:  
11  
12 Association Between Arousal Subtypes at Initial Presentation and 6-Month Mortality in  
13  
14 Older Emergency Department Patients. *The American journal of geriatric psychiatry :*  
15  
16 *official journal of the American Association for Geriatric Psychiatry* 2016 doi:  
17  
18 10.1016/j.jagp.2016.05.016 [published Online First: 2016/09/14]  
19  
20
- 21 7. Pollard C, Fitzgerald M, Ford K. Delirium: The lived experience of older people who are  
22  
23 delirious post-orthopaedic surgery. *International Journal of Mental Health Nursing*  
24  
25 2015;24(3):213-21. doi: 10.1111/inm.12132  
26  
27
- 28 8. Gleason LJ, Schmitt EM, Kosar CM, et al. Effect of Delirium and Other Major Complications  
29  
30 on Outcomes After Elective Surgery in Older Adults. *JAMA Surgery* 2015;150(12):1134-  
31  
32 40. doi: 10.1001/jamasurg.2015.2606  
33  
34
- 35 9. Robinson TN, Raeburn CD, Tran ZV, et al. Postoperative delirium in the elderly: risk factors  
36  
37 and outcomes. *Annals of surgery* 2009;249(1):173-8. doi:  
38  
39 10.1097/SLA.0b013e31818e4776 [published Online First: 2008/12/25]  
40  
41
- 42 10. Adams ST, Leveson SH. Clinical prediction rules. *BMJ (Clinical research ed)* 2012;344  
43  
44
- 45 11. Reilly BM, Evans AT. Translating clinical research into clinical practice: impact of using  
46  
47 prediction rules to make decisions. *Annals of internal medicine* 2006;144(3):201-09.  
48
- 49 12. Moons KGM, Kengne AP, Woodward M, et al. Risk prediction models: I. Development,  
50  
51 internal validation, and assessing the incremental value of a new (bio)marker. *Heart*  
52  
53 2012;98(9):683-90. doi: 10.1136/heartjnl-2011-301246  
54  
55  
56  
57  
58  
59  
60

- 1  
2  
3 13. Debray TPA, Moons KGM, Ahmed I, et al. A framework for developing, implementing, and  
4  
5 evaluating clinical prediction models in an individual participant data meta-analysis.  
6  
7 *Statistics in medicine* 2013;32(18):3158-80. doi: 10.1002/sim.5732  
8  
9
- 10 14. Hayhurst CJ, Pandharipande PP, Hughes CG. Intensive Care Unit Delirium A Review of  
11  
12 Diagnosis, Prevention, and Treatment. *Anesthesiology* 2016;125(6):1229-41. doi:  
13  
14 10.1097/ALN.0000000000001378  
15  
16
- 17 15. Moons KG, de Groot JA, Bouwmeester W, et al. Critical appraisal and data extraction for  
18  
19 systematic reviews of prediction modelling studies: the CHARMS checklist. *PLoS*  
20  
21 *medicine* 2014;11(10):e1001744. doi: 10.1371/journal.pmed.1001744 [published Online  
22  
23 First: 2014/10/15]  
24  
25
- 26 16. Moher D, Liberati A, Tetzlaff J, et al. Preferred reporting items for systematic reviews and  
27  
28 meta-analyses: the PRISMA statement. *Int J Surg* 2010;8(5):336-41. doi:  
29  
30 10.1016/j.ijsu.2010.02.007 [published Online First: 2010/02/23]  
31  
32
- 33 17. Nations U. Ageing 2016 [Available from: [http://www.un.org/en/sections/issues-](http://www.un.org/en/sections/issues-depth/ageing/index.html)  
34  
35 [depth/ageing/index.html](http://www.un.org/en/sections/issues-depth/ageing/index.html) accessed March 7th 2017.  
36  
37
- 38 18. Centers for Disease C. Elder Abuse: Definitions 2016 [Available from:  
39  
40 <https://www.cdc.gov/violenceprevention/elderabuse/definitions.html> accessed March 7th  
41  
42 2017.  
43  
44
- 45 19. Well GA, Shea, B., O'Connell, J.P., Welch, V., Losos, M., Tugwell, P. The Newcastle-  
46  
47 Ottawa Scale (NOS) for assessing the quality of nonrandomised studies in meta-analyses  
48  
49 Ottawa: Ottawa Hospital; 2014 [Available from:  
50  
51 [http://www.ohri.ca/programs/clinical\\_epidemiology/oxford.asp](http://www.ohri.ca/programs/clinical_epidemiology/oxford.asp) accessed 05-31 2016.  
52  
53  
54  
55  
56  
57  
58  
59  
60

- 1  
2  
3 20. Fan J, Upadhye S, Worster A. Understanding receiver operating characteristic (ROC) curves.  
4  
5 *Canadian Journal of Emergency Medicine* 2015;8(1):19-20. doi:  
6  
7 10.1017/S1481803500013336  
8  
9
- 10 21. Steyerberg EW. Clinical prediction models : a practical approach to development, validation,  
11  
12 and updating: New York : Springer, [2009] ©2009 2009.  
13  
14
- 15 22. Carrasco MP, Villarroel L, Andrade M, et al. Development and validation of a delirium  
16  
17 predictive score in older people. *Age and ageing* 2014;43(3):346-51. doi:  
18  
19 10.1093/ageing/aft141 [published Online First: 2013/09/26]  
20  
21
- 22 23. de Wit HAJM, Winkens B, Mestres Gonzalvo C, et al. The development of an automated  
23  
24 ward independent delirium risk prediction model. *Int J Clin Pharm* 2016 doi:  
25  
26 10.1007/s11096-016-0312-7  
27  
28
- 29 24. Douglas VC, Hessler CS, Dhaliwal G, et al. The AWOL tool: derivation and validation of a  
30  
31 delirium prediction rule. *J Hosp Med* 2013;8(9):493-9. doi: 10.1002/jhm.2062 [published  
32  
33 Online First: 2013/08/08]  
34  
35
- 36 25. Fisher BW, Flowerdew G. A simple model for predicting postoperative delirium in older  
37  
38 patients undergoing elective orthopedic surgery. *Journal of the American Geriatrics*  
39  
40 *Society* 1995;43(2):175-8. [published Online First: 1995/02/01]  
41  
42
- 43 26. Freter S, Dunbar M, Koller K, et al. Risk of Pre-and Post-Operative Delirium and the  
44  
45 Delirium Elderly At Risk (DEAR) Tool in Hip Fracture Patients. *Can Geriatr J*  
46  
47 2015;18(4):212-16. doi: 10.5770/cgj.18.185  
48  
49
- 50 27. Freter SH, Dunbar MJ, MacLeod H, et al. Predicting post-operative delirium in elective  
51  
52 orthopaedic patients: the Delirium Elderly At-Risk (DEAR) instrument. *Age and ageing*  
53  
54 2005;34(2):169-71.  
55  
56  
57  
58  
59  
60

- 1  
2  
3 28. Inouye SK, Charpentier PA. Precipitating factors for delirium in hospitalized elderly persons.  
4  
5 Predictive model and interrelationship with baseline vulnerability. *Jama*  
6  
7 1996;275(11):852-7. [published Online First: 1996/03/20]  
8  
9  
10 29. Inouye SK, Viscoli CM, Horwitz RI, et al. A predictive model for delirium in hospitalized  
11  
12 elderly medical patients based on admission characteristics. *Annals of internal medicine*  
13  
14 1993;119(6):474-81. [published Online First: 1993/09/15]  
15  
16  
17 30. Inouye SK, Zhang Y, Jones RN, et al. Risk factors for delirium at discharge: development  
18  
19 and validation of a predictive model. *Archives of internal medicine* 2007;167(13):1406-  
20  
21 13. doi: 10.1001/archinte.167.13.1406 [published Online First: 2007/07/11]  
22  
23  
24 31. Isfandyaty R, Harimurti K, Setiati S, et al. Incidence and predictors for delirium in  
25  
26 hospitalized elderly patients: a retrospective cohort study. *Acta medica Indonesiana*  
27  
28 2012;44(4):290-7. [published Online First: 2013/01/15]  
29  
30  
31 32. Pendlebury ST, Lovett N, Smith SC, et al. Delirium risk stratification in consecutive  
32  
33 unselected admissions to acute medicine: validation of externally derived risk scores. *Age*  
34  
35 *and ageing* 2016;45(1):60-65. doi: 10.1093/ageing/afv177  
36  
37  
38 33. Kalisvaart KJ, Vreeswijk R, de Jonghe JF, et al. Risk factors and prediction of postoperative  
39  
40 delirium in elderly hip-surgery patients: implementation and validation of a medical risk  
41  
42 factor model. *Journal of the American Geriatrics Society* 2006;54(5):817-22. doi:  
43  
44 10.1111/j.1532-5415.2006.00704.x [published Online First: 2006/05/16]  
45  
46  
47 34. Kim MY, Park UJ, Kim HT, et al. DELirium Prediction Based on Hospital Information  
48  
49 (Delphi) in General Surgery Patients. *Medicine (Baltimore)* 2016;95(12):e3072. doi:  
50  
51 10.1097/MD.00000000000003072  
52  
53  
54  
55  
56  
57  
58  
59  
60

- 1  
2  
3 35. Korc-Grodzicki B, Sun SW, Zhou Q, et al. Geriatric Assessment as a Predictor of Delirium  
4 and Other Outcomes in Elderly Patients With Cancer. *Annals of surgery* 2014 doi:  
5  
6 10.1097/sla.0000000000000742 [published Online First: 2014/06/03]  
7  
8  
9  
10 36. Leung JM, Sands LP, Lim E, et al. Does preoperative risk for delirium moderate the effects  
11 of postoperative pain and opiate use on postoperative delirium? *The American journal of*  
12 *geriatric psychiatry : official journal of the American Association for Geriatric*  
13 *Psychiatry* 2013;21(10):946-56. doi: 10.1016/j.jagp.2013.01.069 [published Online First:  
14  
15 2013/05/11]  
16  
17  
18  
19  
20  
21 37. Liang C-K, Chu C-L, Chou M-Y, et al. Developing a Prediction Model for Post-Operative  
22 Delirium and Long-Term Outcomes Among Older Patients Receiving Elective  
23 Orthopedic Surgery: A Prospective Cohort Study in Taiwan. *Rejuvenation Res*  
24 2015;18(4):347-55. doi: 10.1089/rej.2014.1645  
25  
26  
27  
28  
29  
30  
31 38. Maekawa Y, Sugimoto K, Yamasaki M, et al. Comprehensive Geriatric Assessment is a  
32 useful predictive tool for postoperative delirium after gastrointestinal surgery in old-old  
33 adults. *Geriatr Gerontol Int* 2015 doi: 10.1111/ggi.12587  
34  
35  
36  
37  
38 39. Martinez JA, Belastegui A, Basabe I, et al. Derivation and validation of a clinical prediction  
39 rule for delirium in patients admitted to a medical ward: an observational study. *BMJ*  
40 *Open* 2012;2(5) doi: 10.1136/bmjopen-2012-001599 [published Online First:  
41  
42 2012/09/18]  
43  
44  
45  
46  
47 40. Moerman S, Tuinebreijer WE, de Boo M, et al. Validation of the Risk Model for Delirium in  
48 hip fracture patients. *Gen Hosp Psychiatry* 2012;34(2):153-9. doi:  
49  
50 10.1016/j.genhosppsy.2011.11.011 [published Online First: 2012/01/10]  
51  
52  
53  
54  
55  
56  
57  
58  
59  
60



- 1  
2  
3 41. O'Keeffe ST, Lavan JN. Predicting delirium in elderly patients: development and validation  
4  
5 of a risk-stratification model. *Age and ageing* 1996;25(4):317-21. [published Online  
6  
7 First: 1996/07/01]  
8  
9
- 10 42. Pompei P, Foreman M, Rudberg MA, et al. Delirium in hospitalized older persons: outcomes  
11  
12 and predictors. *Journal of the American Geriatrics Society* 1994;42(8):809-15. [published  
13  
14 Online First: 1994/08/01]  
15  
16
- 17 43. Rudolph JL, Doherty K, Kelly B, et al. Validation of a Delirium Risk Assessment Using  
18  
19 Electronic Medical Record Information. *Journal of the American Medical Directors*  
20  
21 *Association* 2016;17(3):244-48 5p. doi: 10.1016/j.jamda.2015.10.020  
22  
23
- 24 44. Rudolph JL, Harrington MB, Lucatoro MA, et al. Validation of a medical record-based  
25  
26 delirium risk assessment. *Journal of the American Geriatrics Society* 2011;59 Suppl  
27  
28 2:S289-94. doi: 10.1111/j.1532-5415.2011.03677.x  
29  
30
- 31 45. Rudolph JL, Jones RN, Levkoff SE, et al. Derivation and validation of a preoperative  
32  
33 prediction rule for delirium after cardiac surgery. *Circulation* 2009;119(2):229-36 8p.  
34  
35 doi: 10.1161/CIRCULATIONAHA.108.795260  
36  
37
- 38 46. Dworkin A, Lee DS, An AR, et al. A Simple Tool to Predict Development of Delirium After  
39  
40 Elective Surgery. *Journal of the American Geriatrics Society* 2016;64(11):e149-e53. doi:  
41  
42 10.1111/jgs.14428 [published Online First: 2016/09/22]  
43  
44
- 45 47. Freter SH, George J, Dunbar MJ, et al. Prediction of delirium in fractured neck of femur as  
46  
47 part of routine preoperative nursing care. *Age and ageing* 2005;34(4):387-8. doi:  
48  
49 10.1093/ageing/afi099 [published Online First: 2005/06/16]  
50  
51
- 52 48. Pendlebury ST, Lovett NG, Smith SC, et al. Delirium risk stratification in consecutive  
53  
54 unselected admissions to acute medicine: validation of a susceptibility score based on  
55  
56  
57  
58  
59  
60

- 1  
2  
3 factors identified externally in pooled data for use at entry to the acute care pathway. *Age*  
4 *and ageing* 2016 doi: 10.1093/ageing/afw198 [published Online First: 2016/11/07]  
5  
6  
7  
8 49. Peduzzi P, Concato J, Kemper E, et al. A simulation study of the number of events per  
9  
10 variable in logistic regression analysis. *J Clin Epidemiol* 1996;49(12):1373-9. [published  
11  
12 Online First: 1996/12/01]  
13  
14  
15 50. Austin PC, Steyerberg EW. Events per variable (EPV) and the relative performance of  
16  
17 different strategies for estimating the out-of-sample validity of logistic regression models.  
18  
19 *Stat Methods Med Res*;0(0):0962280214558972. doi: doi:10.1177/0962280214558972  
20  
21  
22 51. Pavlou M, Ambler G, Seaman SR, et al. How to develop a more accurate risk prediction  
23  
24 model when there are few events. *BMJ (Clinical research ed)* 2015;351:h3868. doi:  
25  
26 10.1136/bmj.h3868 [published Online First: 2015/08/13]  
27  
28  
29 52. Grobman WA, Stamilio DM. Methods of clinical prediction. *American journal of obstetrics*  
30  
31 *and gynecology* 2006;194(3):888-94. doi: 10.1016/j.ajog.2005.09.002 [published Online  
32  
33 First: 2006/03/09]  
34  
35  
36 53. Jones RN, Marcantonio ER, Saczynski JS, et al. Preoperative Cognitive Performance  
37  
38 Dominates Risk for Delirium Among Older Adults. *J Geriatr Psychiatry Neurol* 2016  
39  
40 doi: 10.1177/0891988716666380 [published Online First: 2016/09/21]  
41  
42  
43 54. Kazmierski J, Banys A, Latek J, et al. Mild Cognitive Impairment with Associated  
44  
45 Inflammatory and Cortisol Alterations as Independent Risk Factor for Postoperative  
46  
47 Delirium. *Dementia & Geriatric Cognitive Disorders* 2014;38(1/2):65-78 14p. doi:  
48  
49 10.1159/000357454  
50  
51  
52  
53  
54  
55  
56  
57  
58  
59  
60

- 1  
2  
3 55. Veliz-Reissmüller G, Agüero Torres H, van der Linden J, et al. Pre-operative mild cognitive  
4  
5 dysfunction predicts risk for post-operative delirium after elective cardiac surgery. *Aging*  
6  
7 *Clinical And Experimental Research* 2007;19(3):172-77.  
8  
9
- 10 56. Fong TG, Hshieh TT, Wong B, et al. Neuropsychological profiles of an elderly cohort  
11  
12 undergoing elective surgery and the relationship between cognitive performance and  
13  
14 delirium. *Journal of the American Geriatrics Society* 2015;63(5):977-82. doi:  
15  
16 10.1111/jgs.13383  
17  
18
- 19 57. Rozzini R, Sabatini T, Cassinadri A, et al. Relationship between functional loss before  
20  
21 hospital admission and mortality in elderly persons with medical illness. *J Gerontol A*  
22  
23 *Biol Sci Med Sci* 2005;60(9):1180-3. [published Online First: 2005/09/27]  
24  
25
- 26 58. Fimognari FL, Pierantozzi A, De Alfieri W, et al. The Severity of Acute Illness and  
27  
28 Functional Trajectories in Hospitalized Older Medical Patients. *J Gerontol A Biol Sci*  
29  
30 *Med Sci* 2016 doi: 10.1093/gerona/glw096 [published Online First: 2016/06/04]  
31  
32
- 33 59. Li M, Harris I, Lu ZK. Differences in proxy-reported and patient-reported outcomes:  
34  
35 assessing health and functional status among medicare beneficiaries. *BMC Medical*  
36  
37 *Research Methodology* 2015;15(1):62. doi: 10.1186/s12874-015-0053-7  
38  
39
- 40 60. van Meenen LC, van Meenen DM, de Rooij SE, et al. Risk prediction models for  
41  
42 postoperative delirium: a systematic review and meta-analysis. *Journal of the American*  
43  
44 *Geriatrics Society* 2014;62(12):2383-90. doi: 10.1111/jgs.13138  
45  
46 10.1111/jgs.13138.</p>
- 47  
48  
49 61. Newman MW, O'Dwyer LC, Rosenthal L. Predicting delirium: A review of risk-stratification  
50  
51 models. *General Hospital Psychiatry* 2015;37(5):408-13. doi:  
52  
53 10.1016/j.genhosppsy.2015.05.003  
54  
55  
56  
57  
58  
59  
60

1  
2  
3 62. Campaner CP. Valoración del riesgo de delirium en pacientes mayores hospitalizados. =  
4

5 Delirium risk assessment in elderly hospitalized patients. *Revista Española de Geriatria y*  
6

7 *Gerontología* 2010;45(5):285-90. doi: 10.1016/j.regg.2010.03.011  
8  
9  
10  
11  
12  
13  
14  
15  
16  
17  
18  
19  
20  
21  
22  
23  
24  
25  
26  
27  
28  
29  
30  
31  
32  
33  
34  
35  
36  
37  
38  
39  
40  
41  
42  
43  
44  
45  
46  
47  
48  
49  
50  
51  
52  
53  
54  
55  
56  
57  
58  
59  
60

For peer review only

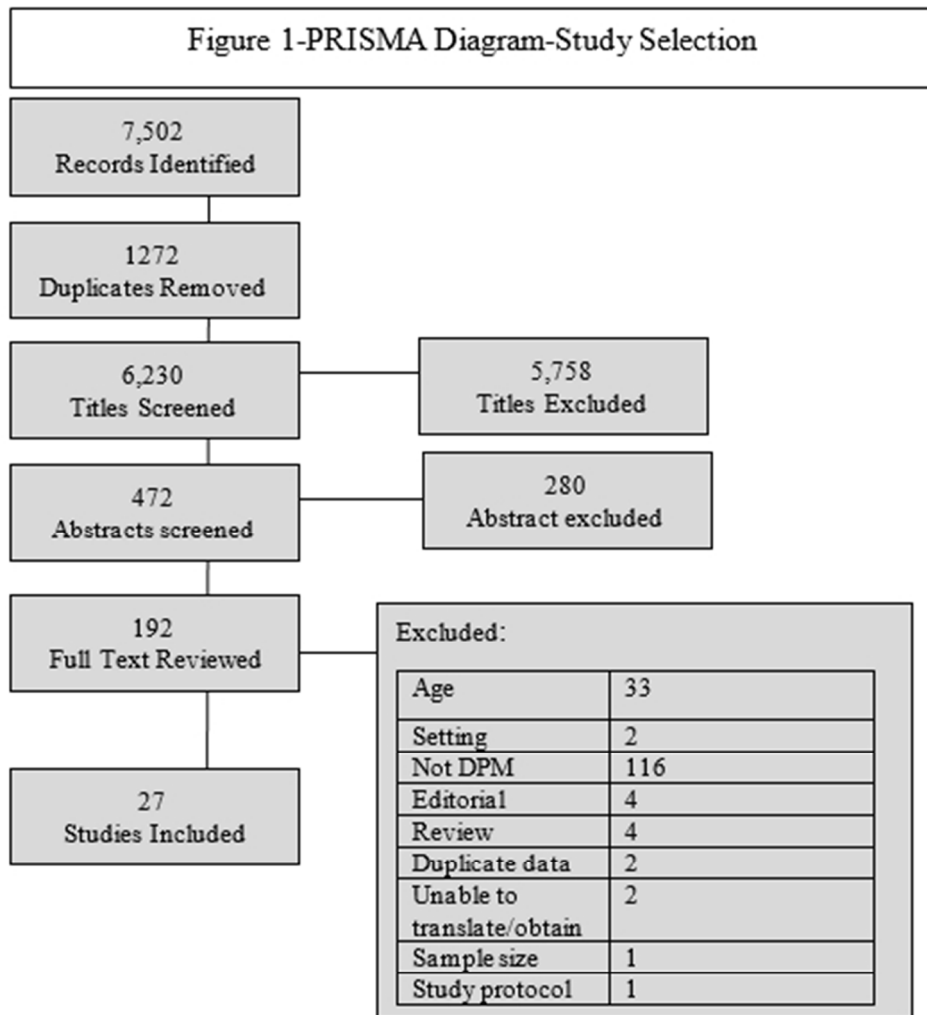

PRISMA Diagram

128x144mm (96 x 96 DPI)

1  
2  
3  
4  
5  
6  
7  
8  
9  
10  
11  
12  
13  
14  
15  
16  
17  
18  
19  
20  
21  
22  
23  
24  
25  
26  
27  
28  
29  
30  
31  
32  
33  
34  
35  
36  
37  
38  
39  
40  
41  
42  
43  
44  
45  
46  
47  
48  
49  
50  
51  
52  
53  
54  
55  
56  
57  
58  
59  
60

Figure 2: Frequency of Variable use in the 13 externally validated Delirium Prediction Models

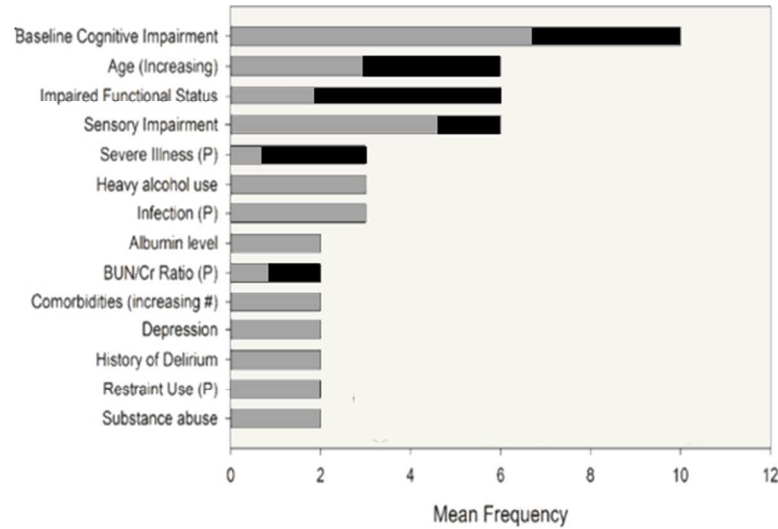

Figure 2 displays the mean frequency of variable use in the thirteen externally validated delirium prediction models. The black bar represents the frequency of variable use in the top five moderately performing delirium predictive models (AUROC > 0.75).

(P) indicates a precipitating risk factor used in a delirium prediction model

The following variables were used once and are not represented in this figure: addition of >3 medications, bladder catheter use, C-Reactive Protein, emergency surgery, presence of fracture upon admission, history of cerebrovascular accident, iatrogenic event, intensive care unit admission, low physical activity, malnutrition (using a validated scale) and open surgery.

Figure 2 displays the mean frequency of variable use in the thirteen externally validated delirium prediction models. The black bar represents the frequency of variable use in the top five moderately performing models (AUROC > 0.75). (P) indicates a precipitating risk factor used in DPMs. The following variables were used once and are not represented in this figure: addition of >3 medications, bladder catheter use, C-Reactive Protein, emergency surgery, presence of fracture upon admission, history of cerebrovascular accident, iatrogenic event, intensive care unit admission, low physical activity, malnutrition (using a validated scale), and open surgery.

190x164mm (96 x 96 DPI)

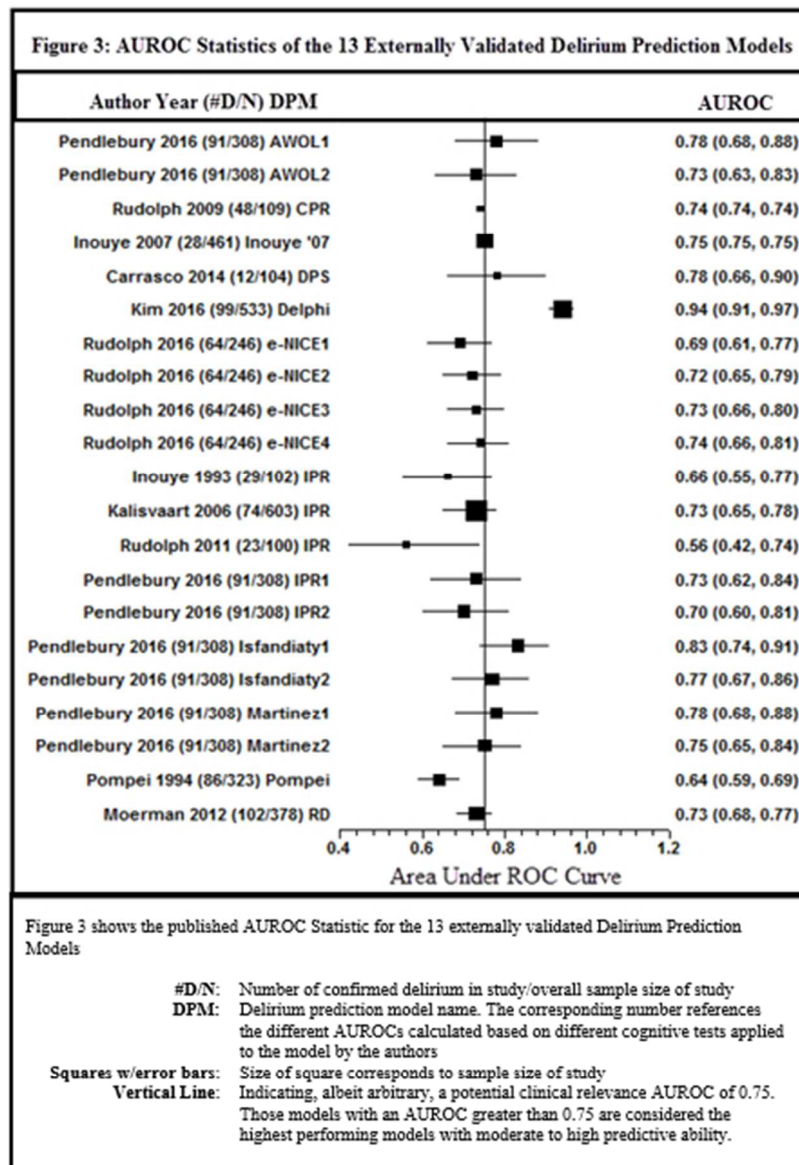

Figure 3 shows the published AUROC Statistic for the 13 externally validated Delirium Prediction Models

#D/N: Number of confirmed delirium in study/overall sample size of study  
DPM: Delirium prediction model name. The corresponding number references the different AUROCs calculated based on different cognitive tests applied to the model by the authors  
Squares w/error bars: Size of square corresponds to sample size of study  
Vertical Line: Indicating, albeit arbitrary, a potential clinical relevance AUROC of 0.75. Those models with an AUROC greater than 0.75 are considered the highest performing models with moderate to high predictive ability.

122x175mm (96 x 96 DPI)

1  
2  
3  
4  
5  
6  
7  
8  
9  
10  
11  
12  
13  
14  
15  
16  
17  
18  
19  
20  
21  
22  
23  
24  
25  
26  
27  
28  
29  
30  
31  
32  
33  
34  
35  
36  
37  
38  
39  
40  
41  
42  
43  
44  
45  
46  
47  
48  
49  
50  
51  
52  
53  
54  
55  
56  
57  
58  
59  
60

For peer review only



1  
2  
3  
4  
5  
6  
7  
8  
9  
10  
11  
12  
13  
14  
15  
16  
17  
18  
19  
20  
21  
22  
23  
24  
25  
26  
27  
28  
29  
30  
31  
32  
33  
34  
35  
36  
37  
38  
39  
40  
41  
42  
43  
44  
45  
46  
47

| <b>Appendix A – Review Protocol</b> |                                                                                                                                                                                                                                                                                                                       |                                                                                            |                                                                                |                                      |
|-------------------------------------|-----------------------------------------------------------------------------------------------------------------------------------------------------------------------------------------------------------------------------------------------------------------------------------------------------------------------|--------------------------------------------------------------------------------------------|--------------------------------------------------------------------------------|--------------------------------------|
| Working Title of Review             | Systematic Review of Delirium Prediction Models                                                                                                                                                                                                                                                                       |                                                                                            | Support                                                                        | Modifications                        |
| Authors                             | 1 <sup>st</sup> & Corresponding                                                                                                                                                                                                                                                                                       | Heidi Lindroth                                                                             | Literature search, data extraction, data synthesis and manuscript preparation. |                                      |
|                                     | Data Extraction                                                                                                                                                                                                                                                                                                       | Heidi Lindroth<br>Suzanne Purvis                                                           | Literature search, data extraction, data synthesis.                            |                                      |
|                                     | Content Experts                                                                                                                                                                                                                                                                                                       | Lisa Bratzke                                                                               | Assisted with content related to cognition. Results review.                    |                                      |
|                                     |                                                                                                                                                                                                                                                                                                                       | Roger Brown                                                                                | Statistical content expert                                                     |                                      |
|                                     |                                                                                                                                                                                                                                                                                                                       | Mark Coburn                                                                                | Results review, Manuscript preparation                                         |                                      |
|                                     |                                                                                                                                                                                                                                                                                                                       | Marko Mrkobrada                                                                            | Results review, Manuscript preparation                                         |                                      |
|                                     |                                                                                                                                                                                                                                                                                                                       | Matthew TV Chan                                                                            | Results review, Manuscript preparation                                         |                                      |
|                                     |                                                                                                                                                                                                                                                                                                                       | Daniel Davis                                                                               | Geriatrician expertise, reviewed results, manuscript preparation.              |                                      |
|                                     |                                                                                                                                                                                                                                                                                                                       | Pratik Pandharipande                                                                       | Results review, Manuscript preparation                                         |                                      |
|                                     |                                                                                                                                                                                                                                                                                                                       | Cynthia M. Carlsson                                                                        | Geriatrician expertise, reviewed results, manuscript preparation.              |                                      |
| Mentoring                           | Robert D. Sanders                                                                                                                                                                                                                                                                                                     | Mentoring author, resolved content/data disagreements b/w authors, manuscript preparation. |                                                                                |                                      |
| Aim                                 | To identify existing prognostic delirium prediction models and evaluate their validity and statistical methodology in the older adult (≥60yo) acute hospital population.                                                                                                                                              |                                                                                            |                                                                                |                                      |
| Search Terms                        | ("Delirium" OR "postoperative delirium" OR "ICU delirium" OR "ICU psychosis" OR "ICU syndrome" OR "acute confusional state" OR "acute brain dysfunction") AND ("inpatient" OR "hospital*" OR "postoperative" OR surg* OR "critical care unit" OR "intensive care unit" OR CCU OR ICU) AND ("predict*" model OR risk*) |                                                                                            | UW-Madison Health Sciences librarian. Three meetings to refine search terms.   |                                      |
| Databases searched                  | PubMed, CINAHL, PsychINFO, Cochrane, SocINDEX and Medline                                                                                                                                                                                                                                                             |                                                                                            | Health Sciences librarian.                                                     | Expanded to include SocINDEX         |
| Timelines established               | 01/01/1990-12/31/2016                                                                                                                                                                                                                                                                                                 |                                                                                            |                                                                                | Originally was 12/31/15. Expanded to |

|                         |                                                                                                                                                                                                                                                                                                                                                                                                                                                                                                                                                                                                        |                  |                                                                                               |
|-------------------------|--------------------------------------------------------------------------------------------------------------------------------------------------------------------------------------------------------------------------------------------------------------------------------------------------------------------------------------------------------------------------------------------------------------------------------------------------------------------------------------------------------------------------------------------------------------------------------------------------------|------------------|-----------------------------------------------------------------------------------------------|
|                         |                                                                                                                                                                                                                                                                                                                                                                                                                                                                                                                                                                                                        |                  | include all of 2016.                                                                          |
| Inclusion criteria      | <ul style="list-style-type: none"> <li>• Age <math>\geq</math> 60</li> <li>• Inpatient population</li> <li>• Developing and/or validating a delirium prediction model</li> </ul>                                                                                                                                                                                                                                                                                                                                                                                                                       |                  | Age expanded from $\geq$ 70 years of age due to the literature                                |
| Exclusion criteria      | <ul style="list-style-type: none"> <li>• Emergency department</li> <li>• Hospice/palliative care</li> <li>• Pediatric population</li> <li>• Related to alcohol withdrawal</li> <li>• <math>\leq</math>50 sample size</li> </ul>                                                                                                                                                                                                                                                                                                                                                                        | Mentoring author | Sample size criteria added to build rigor in the studies that were included in the sys review |
| Selection process       | Studies will be selected based on the inclusion/exclusion criteria. The data extraction authors (HL and SP) will conduct the literature search independently and meet monthly to discuss findings. Any disagreements will be resolved by the mentoring author (RDS)                                                                                                                                                                                                                                                                                                                                    |                  |                                                                                               |
| Data Management         | A shared folder on the UW-Madison Box account will be created to share documents, data and meeting information.                                                                                                                                                                                                                                                                                                                                                                                                                                                                                        |                  |                                                                                               |
| Data collection process | Data will be collected independently by HL and SP then data points will be shared at monthly meetings. Data collection tables will be created using Microsoft Excel then uploaded to the shared Box account. Any disagreement between authors will be resolved by the mentoring author (RDS).                                                                                                                                                                                                                                                                                                          |                  |                                                                                               |
| Data points collected   | <ul style="list-style-type: none"> <li>• Characteristics of studies (design, population, sample size)</li> <li>• Outcome measure including how it was identified, measured, defined. Prevalence.</li> <li>• Statistical methods applied</li> <li>• Statistical information about the delirium prediction models (sensitivity, specificity, positive predictive value, negative predictive value, AUROC)</li> <li>• Characteristics of DPMs (variables used, scoring, development)</li> <li>• Cognitive measures used in studies.</li> <li>• Criteria to fulfill the Newcastle Ottawa Scale.</li> </ul> |                  |                                                                                               |
| Outcomes                | <ul style="list-style-type: none"> <li>• AUROC will be the primary outcome measure</li> <li>• Characteristics of DPMs (variables, statistics)</li> <li>• Cognitive tests used</li> </ul>                                                                                                                                                                                                                                                                                                                                                                                                               |                  |                                                                                               |
| Data synthesis          | The first/corresponding author (HL) will synthesize the data into the                                                                                                                                                                                                                                                                                                                                                                                                                                                                                                                                  |                  |                                                                                               |

1  
2  
3  
4  
5  
6  
7  
8  
9  
10  
11  
12  
13  
14  
15  
16  
17  
18  
19  
20  
21  
22  
23  
24  
25  
26  
27  
28  
29  
30  
31  
32  
33  
34  
35  
36  
37  
38  
39  
40  
41  
42  
43  
44  
45  
46  
47

|                        |                                                                                                                                                                       |  |  |
|------------------------|-----------------------------------------------------------------------------------------------------------------------------------------------------------------------|--|--|
|                        | manuscript. The co-authors will verify this.<br>RB will complete the meta-analysis.                                                                                   |  |  |
| Manuscript preparation | HL will complete manuscript preparation. All co-authors are responsible for reviewing content and data to assure correctness and complete synthesis of data gathered. |  |  |

For peer review only

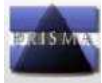

# PRISMA 2009 Checklist

| Section/topic                      | #  | Checklist item                                                                                                                                                                                                                                                                                              | Reported on page # |
|------------------------------------|----|-------------------------------------------------------------------------------------------------------------------------------------------------------------------------------------------------------------------------------------------------------------------------------------------------------------|--------------------|
| <b>TITLE</b>                       |    |                                                                                                                                                                                                                                                                                                             |                    |
| Title                              | 1  | Identify the report as a systematic review, meta-analysis, or both.                                                                                                                                                                                                                                         | 1                  |
| <b>ABSTRACT</b>                    |    |                                                                                                                                                                                                                                                                                                             |                    |
| Structured summary                 | 2  | Provide a structured summary including, as applicable: background; objectives; data sources; study eligibility criteria, participants, and interventions; study appraisal and synthesis methods; results; limitations; conclusions and implications of key findings; systematic review registration number. | 2                  |
| <b>INTRODUCTION</b>                |    |                                                                                                                                                                                                                                                                                                             |                    |
| Rationale                          | 3  | Describe the rationale for the review in the context of what is already known.                                                                                                                                                                                                                              | 4                  |
| Objectives                         | 4  | Provide an explicit statement of questions being addressed with reference to participants, interventions, comparisons, outcomes, and study design (PICOS).                                                                                                                                                  | 4                  |
| <b>METHODS</b>                     |    |                                                                                                                                                                                                                                                                                                             |                    |
| Protocol and registration          | 5  | Indicate if a review protocol exists, if and where it can be accessed (e.g., Web address), and, if available, provide registration information including registration number.                                                                                                                               | 4                  |
| Eligibility criteria               | 6  | Specify study characteristics (e.g., PICOS, length of follow-up) and report characteristics (e.g., years considered, language, publication status) used as criteria for eligibility, giving rationale.                                                                                                      | 4-5                |
| Information sources                | 7  | Describe all information sources (e.g., databases with dates of coverage, contact with study authors to identify additional studies) in the search and date last searched.                                                                                                                                  | 5                  |
| Search                             | 8  | Present full electronic search strategy for at least one database, including any limits used, such that it could be repeated.                                                                                                                                                                               | 5                  |
| Study selection                    | 9  | State the process for selecting studies (i.e., screening, eligibility, included in systematic review, and, if applicable, included in the meta-analysis).                                                                                                                                                   | 5                  |
| Data collection process            | 10 | Describe method of data extraction from reports (e.g., piloted forms, independently, in duplicate) and any processes for obtaining and confirming data from investigators.                                                                                                                                  | 5                  |
| Data items                         | 11 | List and define all variables for which data were sought (e.g., PICOS, funding sources) and any assumptions and simplifications made.                                                                                                                                                                       | 5-6                |
| Risk of bias in individual studies | 12 | Describe methods used for assessing risk of bias of individual studies (including specification of whether this was done at the study or outcome level), and how this information is to be used in any data synthesis.                                                                                      | 6                  |
| Summary measures                   | 13 | State the principal summary measures (e.g., risk ratio, difference in means).                                                                                                                                                                                                                               | 6                  |
| Synthesis of results               | 14 | Describe the methods of handling data and combining results of studies, if done, including measures of consistency (e.g., $I^2$ ) for each meta-analysis.                                                                                                                                                   | 6                  |

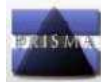

# PRISMA 2009 Checklist

Page 1 of 2

| Section/topic                 | #  | Checklist item                                                                                                                                                                                           | Reported on page #    |
|-------------------------------|----|----------------------------------------------------------------------------------------------------------------------------------------------------------------------------------------------------------|-----------------------|
| Risk of bias across studies   | 15 | Specify any assessment of risk of bias that may affect the cumulative evidence (e.g., publication bias, selective reporting within studies).                                                             | 6                     |
| Additional analyses           | 16 | Describe methods of additional analyses (e.g., sensitivity or subgroup analyses, meta-regression), if done, indicating which were pre-specified.                                                         | 6                     |
| <b>RESULTS</b>                |    |                                                                                                                                                                                                          |                       |
| Study selection               | 17 | Give numbers of studies screened, assessed for eligibility, and included in the review, with reasons for exclusions at each stage, ideally with a flow diagram.                                          | 6                     |
| Study characteristics         | 18 | For each study, present characteristics for which data were extracted (e.g., study size, PICOS, follow-up period) and provide the citations.                                                             | 6                     |
| Risk of bias within studies   | 19 | Present data on risk of bias of each study and, if available, any outcome level assessment (see item 12).                                                                                                | 7-8<br>Table 1        |
| Results of individual studies | 20 | For all outcomes considered (benefits or harms), present, for each study: (a) simple summary data for each intervention group (b) effect estimates and confidence intervals, ideally with a forest plot. | Table 1,2<br>Figure 3 |
| Synthesis of results          | 21 | Present results of each meta-analysis done, including confidence intervals and measures of consistency.                                                                                                  | N/A                   |
| Risk of bias across studies   | 22 | Present results of any assessment of risk of bias across studies (see Item 15).                                                                                                                          | Table 1               |
| Additional analysis           | 23 | Give results of additional analyses, if done (e.g., sensitivity or subgroup analyses, meta-regression [see Item 16]).                                                                                    | 8-16                  |
| <b>DISCUSSION</b>             |    |                                                                                                                                                                                                          |                       |
| Summary of evidence           | 24 | Summarize the main findings including the strength of evidence for each main outcome; consider their relevance to key groups (e.g., healthcare providers, users, and policy makers).                     | 16-18                 |
| Limitations                   | 25 | Discuss limitations at study and outcome level (e.g., risk of bias), and at review-level (e.g., incomplete retrieval of identified research, reporting bias).                                            | 18-19                 |
| Conclusions                   | 26 | Provide a general interpretation of the results in the context of other evidence, and implications for future research.                                                                                  | 16-21                 |
| <b>FUNDING</b>                |    |                                                                                                                                                                                                          |                       |
| Funding                       | 27 | Describe sources of funding for the systematic review and other support (e.g., supply of data); role of funders for the systematic review.                                                               | 6                     |

From: Moher D, Liberati A, Tetzlaff J, Altman DG, The PRISMA Group (2009). Preferred Reporting Items for Systematic Reviews and Meta-Analyses: The PRISMA Statement. PLoS Med 6(7): e1000097. doi:10.1371/journal.pmed1000097

For more information, visit: [www.prisma-statement.org](http://www.prisma-statement.org)

For peer review only - <http://bmjopen.bmj.com/site/about/guidelines.xhtml>

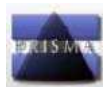

# PRISMA 2009 Checklist

For peer review only

- 1
- 2
- 3
- 4
- 5
- 6
- 7
- 8
- 9
- 10
- 11
- 12
- 13
- 14
- 15
- 16
- 17
- 18
- 19
- 20
- 21
- 22
- 23
- 24
- 25
- 26
- 27
- 28
- 29
- 30
- 31
- 32
- 33
- 34
- 35
- 36
- 37
- 38
- 39
- 40
- 41
- 42
- 43
- 44
- 45
- 46
- 47

# BMJ Open

## Systematic Review of Prediction Models for Delirium in the Older Adult Inpatient

|                                 |                                                                                                                                                                                                                                                                                                                                                                                                                                                                                                                                                                                                                                                                                                                                                                                                                                                                                                                                                                                                                                                                                                                            |
|---------------------------------|----------------------------------------------------------------------------------------------------------------------------------------------------------------------------------------------------------------------------------------------------------------------------------------------------------------------------------------------------------------------------------------------------------------------------------------------------------------------------------------------------------------------------------------------------------------------------------------------------------------------------------------------------------------------------------------------------------------------------------------------------------------------------------------------------------------------------------------------------------------------------------------------------------------------------------------------------------------------------------------------------------------------------------------------------------------------------------------------------------------------------|
| Journal:                        | <i>BMJ Open</i>                                                                                                                                                                                                                                                                                                                                                                                                                                                                                                                                                                                                                                                                                                                                                                                                                                                                                                                                                                                                                                                                                                            |
| Manuscript ID                   | bmjopen-2017-019223.R1                                                                                                                                                                                                                                                                                                                                                                                                                                                                                                                                                                                                                                                                                                                                                                                                                                                                                                                                                                                                                                                                                                     |
| Article Type:                   | Research                                                                                                                                                                                                                                                                                                                                                                                                                                                                                                                                                                                                                                                                                                                                                                                                                                                                                                                                                                                                                                                                                                                   |
| Date Submitted by the Author:   | 22-Jan-2018                                                                                                                                                                                                                                                                                                                                                                                                                                                                                                                                                                                                                                                                                                                                                                                                                                                                                                                                                                                                                                                                                                                |
| Complete List of Authors:       | Lindroth, Heidi; University of Wisconsin Madison School of Medicine and Public Health, Department of Anesthesiology; University of Wisconsin Madison Graduate School, School of Nursing<br>Bratzke, Lisa; University of Wisconsin-Madison, School of Nursing<br>Purvis, Suzanne; University of Wisconsin Hospital and Clinics, Nursing<br>Brown, Roger; University of Wisconsin Madison, School of Nursing<br>Coburn, Mark; Uniklinik RWTH Aachen, Anaesthesiology<br>Mrkobrada, Marko; Western University, Medicine<br>Chan, MTV; The Chinese University of Hong Kong, Anesthesia and Intensive Care<br>Davis, Daniel; University College London, MRC Unit for Lifelong Health and Ageing ; University College London<br>Pandharipande, Pratik; Vanderbilt University School of Medicine<br>Carlsson, Cynthia; William S. Middleton Veteran's Administration Geriatric Research Education and Clinical Center (GRECC), GRECC; University of Wisconsin Madison School of Medicine and Public Health<br>Sanders, Robert; University of Wisconsin Madison School of Medicine and Public Health, Department of Anesthesiology |
| <b>Primary Subject Heading</b>: | Geriatric medicine                                                                                                                                                                                                                                                                                                                                                                                                                                                                                                                                                                                                                                                                                                                                                                                                                                                                                                                                                                                                                                                                                                         |
| Secondary Subject Heading:      | Neurology                                                                                                                                                                                                                                                                                                                                                                                                                                                                                                                                                                                                                                                                                                                                                                                                                                                                                                                                                                                                                                                                                                                  |
| Keywords:                       | Delirium, GERIATRIC MEDICINE, Statistic                                                                                                                                                                                                                                                                                                                                                                                                                                                                                                                                                                                                                                                                                                                                                                                                                                                                                                                                                                                                                                                                                    |
|                                 |                                                                                                                                                                                                                                                                                                                                                                                                                                                                                                                                                                                                                                                                                                                                                                                                                                                                                                                                                                                                                                                                                                                            |

SCHOLARONE™  
Manuscripts

## Systematic Review of Prediction Models for Delirium in the Older Adult Inpatient

Heidi Lindroth, Lisa Bratzke, Suzanne Purvis, Roger Brown, Mark Coburn, Marko Mrkobrada, Matthew TV Chan, Daniel Davis, Pratik Pandharipande, Cynthia M. Carlsson, Robert D. Sanders University of Wisconsin School of Medicine and Public Health, Department of Anesthesiology, School of Nursing, 600 Highland Avenue, Madison, WI 53792 Heidi Lindroth BSN PhD Candidate<sup>1</sup>

University of Wisconsin School of Nursing, 701 Highland Avenue, Madison, WI 53705 Lisa Bratzke PhD Assistant Professor<sup>2</sup>

University Hospital, 600 Highland Avenue, Madison, WI 53792 Suzanne Purvis DNP, Clinical Nurse Specialist<sup>3</sup>

University of Wisconsin School of Nursing, 701 Highland Avenue, Madison, WI 53705 Roger L. Brown PhD, Professor<sup>4</sup>

University Hospital RWTH Aachen, Department of Anesthesiology, Pauwelsstrasse 30, 52074 Aachen, Mark Coburn MD, Professor<sup>5</sup>

Western University, Schulich School of Medicine and Dentistry, 339 Windermere Road, Room B9-100, London ON N5X 3W6, Marko Mrkobrada MD Associate Professor<sup>6</sup>

The Chinese University of Hong Kong, Department of Anaesthesia and Intensive Care, 4/F Main Clinical Block and Trauma Center, Prince of Wales Hospital, Hong Kong Special Administrative Region, China, Matthew TV Chan, MB, BS, PhD, Professor<sup>7</sup>

MRC Unit for Lifelong Health and Ageing at UCL, 33 Bedford Place, London, WC1B 5JU, Daniel Davis PhD MRCP, Senior Clinical Researcher<sup>8</sup>

Vanderbilt University Medical Center, Department of Anesthesiology, 1211 Medical Center Drive, Nashville TN 37322, Pratik Pandharipande MD, Chief, Division of Anesthesiology Critical Care Medicine<sup>9</sup>

University of Wisconsin School of Medicine and Public Health, Madison VA Geriatric Research Education and Clinical Center (GRECC) (D4211), 2500 Overlook Terrace, Madison, WI, 53705, Cynthia M. Carlsson, MD, MS, Associate Professor of Medicine, Division of Geriatrics<sup>10</sup>

University of Wisconsin School of Medicine and Public Health, Department of Anesthesiology, 600 Highland Avenue, Madison, WI 53792, Robert D. Sanders MBBS PhD FRCA, Assistant Professor<sup>11</sup>

**+Corresponding author:** Heidi Lindroth, Department of Anesthesiology, University of Wisconsin School of Medicine and Public Health, 600 Highland Avenue, B6/319 CSC Madison, WI 53792-3272 Telephone: 608-262-6469 Fax: 608-263-0575 Madison, USA. Email: [hlindroth@wisc.edu](mailto:hlindroth@wisc.edu)

Word count: 4043



## Objective

To identify existing prognostic delirium prediction models and evaluate their validity and statistical methodology in the older adult ( $\geq 60$ yo) acute hospital population.

## Design

Systematic review

## Data Sources and methods

PubMed, CINAHL, PsychINFO, SocINFO, Cochrane, Web of Science, and EMBASE were searched from 1 January 1990 to 31 December 2016. The PRISMA and CHARMS Statement guided protocol development. Inclusion criteria: Age  $\geq 60$ , inpatient, developed/validated a prognostic delirium prediction model. Exclusion criteria: alcohol-related delirium, sample size  $\leq 50$ . The primary performance measures were calibration and discrimination statistics. Two authors independently conducted search and extracted data. The synthesis of data was done by the first author. Disagreement was resolved by the mentoring author.

## Results

The initial search resulted in 7,502 studies. Following full-text review of 192 studies, 33 were excluded based on age criteria ( $< 60$  yrs) and 27 met the defined criteria. Twenty-three delirium prediction models were identified, fourteen were externally validated and three were internally validated. The following populations were represented: 11-medical, 3-medical/surgical, and 13-surgical. The assessment of delirium was often non-systematic resulting in varied incidence. Fourteen models were externally validated with an AUROC range from 0.52-0.94. Limitations in design, data collection methods, and model metric reporting statistics were identified.

## Conclusions

Delirium prediction models for older adults show variable and typically inadequate predictive

1  
2  
3 capabilities. Our review highlights the need for development of robust models to predict delirium  
4  
5 in older inpatients. We provide recommendations for the development of such models.  
6  
7

### 8 **Funding**

9  
10 Department of Anesthesiology, University of Wisconsin-Madison.

11  
12 1K23AG055700-01A1

13  
14 R01 NHLBI (HL111111) and research grant from Hospira Inc., NIH collaboration

15  
16 All authors completed ICMJE disclosure forms and no conflicts of interest declared.  
17  
18

### 19 **Keywords**

20  
21 Delirium. Aging. Cognition. Prediction. Statistical Models.  
22  
23

### 24 **Strengths and Limitations of this Study**

- 25
- 26 • This study used the PRISMA Statement and the CHARMS checklist to develop a  
27 protocol involving comprehensive search terms and databases.
  - 28 • The assembled interprofessional authorship team contributed different perspectives on  
29 delirium prediction models and statistical methodology.
  - 30 • This review focused on a narrow population, older adult inpatients, and could be  
31 expanded to include all ages and settings including palliative care, long term care and the  
32 emergency room.  
33  
34  
35  
36  
37  
38  
39  
40  
41  
42  
43  
44  
45  
46  
47  
48  
49  
50  
51  
52  
53  
54  
55  
56  
57  
58  
59  
60

## INTRODUCTION

Delirium is an acute disturbance of consciousness and cognition precipitated by an acute event such as sudden illness, infection, or surgery. This syndrome is a serious public health concern, as up to 50% of hospitalised older adults will experience delirium in medical and surgical populations.<sup>1-3</sup> Delirium has been independently associated with increased mortality, morbidity in terms of impaired cognition and functional disability along with an estimated annual U.S. expenditure of \$152 billion.<sup>4-9</sup> Prediction models allow clinicians to forecast which individuals are at a higher risk for the development of a particular disease process and target specific interventions at the identified risk profile.<sup>10-13</sup> At present, an extensive list of modifiable and non-modifiable, predisposing, and precipitating delirium risk factors encumbers clinicians, hindering the ability to select the most important or contributing risk factor.<sup>1 14</sup> An accurate and timely delirium prediction model would formalize the highest impact risk factors into a powerful tool, facilitating early implementation of prevention measures.<sup>11</sup> This systematic review expands on previous published reviews on delirium prediction models by integrating both medical and surgical populations while examining statistical aspects of each study including reporting metrics and includes recently published models.

### Aim

Our aim was to provide important recommendations on study design for future delirium prediction models while integrating knowledge gained from the study of both medical and surgical populations. We conducted a systematic review of the literature focusing on the identification and subsequent validity of existing prognostic delirium prediction models in the older adult ( $\geq 60$  years old) acute hospital population.

## METHODS

1  
2  
3 This systematic review followed the protocol developed from the PRISMA Statement and the  
4 CHARMS checklist (Appendix A).<sup>15 16</sup> A delirium prediction model was defined as a statistical  
5 model that either stratified individuals for their level of delirium risk, or assigned a risk score to  
6 an individual based on the number and/or weighted value of predetermined modifiable and non-  
7 modifiable risk factors of delirium present. This review included studies focused on 1) older  
8 adult ( $\geq 60$  years) population, (the U.S. Center for Disease Control and Prevention and United  
9 Nations define an older adult as 60 years of age and older)<sup>17 18</sup>, 2) inpatient hospital setting, 3)  
10 publication dates of 1 January 1990 to 31 December 2016, and 4) developed and/or validated  
11 delirium prediction models. Studies were excluded if they 1) studied a different patient  
12 population (i.e. emergency department, skilled nursing facilities, palliative care, and hospice) as  
13 these are unique patient populations with characteristics requiring specific foci and are not  
14 readily generalizable to a medical or surgical inpatient hospital setting. Further, recommended  
15 therapies for treatment of delirium symptoms vary between the populations.<sup>19 20</sup> 2) related to  
16 alcohol withdrawal, or delirium tremens, as the presence of alcohol withdrawal complicates  
17 delirium assessment, and 3) had a sample size  $\leq 50$  for methodological reasons (i.e.  
18 underpowered). All study designs were included. Studies were not limited by timeframe of  
19 delirium development (prevalent vs incident), however, only prognostic statistics were discussed.  
20 The search terms were as follows: (“Delirium” OR “postoperative delirium” OR “ICU  
21 delirium” OR “ICU psychosis” OR “ICU syndrome” OR “acute confusional state” OR “acute  
22 brain dysfunction”) AND (“inpatient” OR “hospital\*” OR “postoperative” OR surg\* OR  
23 “critical care unit” OR “intensive care unit” OR CCU OR ICU) AND (“predict\*” model OR  
24 risk\*). Electronic databases of PubMed, CINAHL, PsycINFO, Cochrane Database of Systematic  
25 Reviews, SocINDEX, Web of Science, and EMBASE were searched. Studies using a language  
26  
27  
28  
29  
30  
31  
32  
33  
34  
35  
36  
37  
38  
39  
40  
41  
42  
43  
44  
45  
46  
47  
48  
49  
50  
51  
52  
53  
54  
55  
56  
57  
58  
59  
60

1  
2  
3 other than English were included if translation was available through the University of  
4  
5  
6  
7  
8  
9  
10  
11  
12  
13  
14  
15  
16  
17  
18  
19  
20  
21  
22  
23  
24  
25  
26  
27  
28  
29  
30  
31  
32  
33  
34  
35  
36  
37  
38  
39  
40  
41  
42  
43  
44  
45  
46  
47  
48  
49  
50  
51  
52  
53  
54  
55  
56  
57  
58  
59  
60

other than English were included if translation was available through the University of Wisconsin-Madison Health Sciences Librarian. Bibliographies of identified studies were hand-searched for additional references. Study quality was assessed through the Newcastle-Ottawa Scale (NOS)<sup>21</sup> for case-control and cohort studies. Risk of bias was assessed through the CHARMS checklist.<sup>15</sup> Two authors (HL, SP) independently performed data collection, data extraction, and assessed study quality, with any disagreement resolved by RDS.

### Outcomes

Data extracted included: 1) study characteristics (study design, population, sample size), 2) outcome measure (method of identification and diagnosis, frequency, and length of screening), 3) model performance information including the diagnostic accuracy of the delirium prediction models, calibration metrics, and events per variable 4) characteristics of the models (variables used in model, scoring/stratification system), 5) cognitive measures used in the study and 6) statistical methods applied for analysis. Five authors were contacted for missing or incomplete data. Four responses were received.

### Statistics

Model performance was assessed through calibration and classification metrics.<sup>15</sup> The AUROC was the primary measure collected to evaluate the discriminatory ability of the delirium prediction models. Clinical utility statistics such as sensitivity, specificity, positive predictive values, negative predictive values, odds ratios, relative risk statistics and use of decision curve analysis or clinical utility cure analysis were also collected from each delirium prediction model in reference to the model's reported cut-off value. Goodness-of-fit statistics including Chi-square ( $\chi^2$ ) and Hosmer-Lemeshow tests were collected to evaluate effective model calibration. Studies were also assessed for the inclusion of calibration plots and slopes. Model calibration refers to

1  
2  
3 the agreement between observed outcomes and predictions.<sup>22</sup> Secondary pre-planned outcome  
4 measures included cognitive assessments, and predictive variable use per model.  
5  
6

### 7 **Role of the Funding Source**

8  
9  
10 The funding sources named has no role in this study. All authors had full access to all the data in  
11 the study and shared responsibility for the decision to submit the publication.  
12  
13

## 14 **RESULTS**

15  
16  
17 Twenty-seven studies were identified for inclusion.<sup>23-47</sup> The initial search resulted in 7,502  
18 citations, with 192 studies chosen for full-text review as detailed in the PRISMA diagram  
19 (Figure 1). We did not identify any relevant, unpublished studies for this review. The inclusion  
20 criteria were modified for two studies that developed models in younger populations but these  
21 models were externally validated in the target population of this review (age  $\geq 60$ ).<sup>25 40</sup>  
22  
23

24  
25  
26  
27  
28 Twenty-three delirium prediction models were developed, fourteen were externally validated<sup>23 27</sup>  
29  
30  
31  
32  
33  
34  
35  
36  
37  
38  
39  
40  
41  
42  
43  
44  
45  
46  
47  
48  
49  
50  
51  
52  
53  
54  
55  
56  
57  
58  
59  
60  
29-31 33-35 41 43-46 and three were internally validated.<sup>24 37 42</sup> Prospective cohort design was used in  
23 studies.<sup>23 25-31 33-35 37-49</sup> Retrospective design was used in four studies.<sup>24 32 36 44</sup> Nineteen studies  
used consecutive sampling methods,<sup>23 25-31 33 34 38 40-42 44 45 47-49</sup> two of these were part of a  
randomized control trial.<sup>34 41</sup> Eleven studies focused on the medical population<sup>23 25 29-33 40 42 45 49</sup>,  
three included medical and surgical<sup>24 43 44</sup> and thirteen recruited a surgical population (seven-  
orthopaedic<sup>26-28 34 38 41 48</sup>, one-cardiac<sup>46</sup>, two-noncardiac<sup>37 47</sup>, one general surgery<sup>35</sup>, two-  
oncological<sup>36 39</sup>). None of the identified studies focused on critical care patients. Data collection  
occurred upon admission in seventeen studies<sup>23 25 27 29-31 33-35 40-45 48 49</sup>; participants were  
approached within forty-eight hours of admission. Seven studies collected data pre-operatively  
then followed participants post-operatively.<sup>26 28 37-39 46 47</sup> Data collection overlapped with  
delirium assessments in three studies.<sup>27 32 35</sup> The average NOS quality ranking for included

1  
2  
3 cohort studies was seven; five studies received the maximum of nine stars. Risk of bias was  
4  
5 assessed using the CHARMS checklist<sup>15</sup> and results are shown in Figure 2. Further  
6  
7 characteristics of studies are listed in Table 1.  
8  
9  
10  
11  
12  
13  
14  
15  
16  
17  
18  
19  
20  
21  
22  
23  
24  
25  
26  
27  
28  
29  
30  
31  
32  
33  
34  
35  
36  
37  
38  
39  
40  
41  
42  
43  
44  
45  
46  
47  
48  
49  
50  
51  
52  
53  
54  
55  
56  
57  
58  
59  
60

For peer review only

| <b>Table 1</b>                              |                                                                                           |                                          |                                                                             |                                                     |                                                                                                      |
|---------------------------------------------|-------------------------------------------------------------------------------------------|------------------------------------------|-----------------------------------------------------------------------------|-----------------------------------------------------|------------------------------------------------------------------------------------------------------|
| <b>Author</b>                               | <b>Study Design<br/>Population<br/>Sample Size<br/>Sampling method<br/>Power Analysis</b> | <b>Study Grade<br/>(NOS)</b>             | <b>Outcome Variable &amp;<br/>Rate (%)</b>                                  | <b>Delirium<br/>measurement &amp;<br/>frequency</b> | <b>DPM Name &amp;<br/>Regression Model used</b>                                                      |
| Carrasco et al. (2014) <sup>23</sup>        | P.Cohort<br>Medical<br>Dev: 374<br>Val: 104<br>Consecutive                                | S: ****<br>C: -<br>O: **<br>T: 6 stars   | Delirium<br>Dev: 25 (.06)<br>Val: 12 (12)                                   | CAM<br>Every 48 h                                   | Predictive Risk Score<br>Forward stepwise                                                            |
| de Wit et al. (2016) <sup>24</sup>          | Retro<br>All hospital patients<br>Dev: 1291<br>Convenience<br>Power analysis              | S: ***<br>C: **<br>O: ***<br>T: 8 stars  | Delirium<br>Dev: 225(17)                                                    | Chart abstraction<br>EHR "diagnosis<br>table"       | Automated Delirium<br>Prediction Model<br>Multivariate                                               |
| Douglas et al.** (2013) <sup>25</sup>       | P.Cohort<br>Medical<br>Dev: 209<br>Val: 165<br>Consecutive<br>Power analysis              | S: ****<br>C: -<br>O: ***<br>T: 7 stars  | Delirium<br>Dev: 25(12)<br>Val: 14(8.5)                                     | CAM-S & CAM<br>Daily                                | Risk Stratification model<br>(AWOL)<br>Forward stepwise                                              |
| Dworkin et al. (2016) <sup>47</sup>         | P.Cohort<br>Elective noncardiac<br>surg<br>Dev: 76<br>Consecutive                         | S: ****<br>C: -<br>O: **<br>T: 6 stars   | Delirium<br>Dev: 10(13)                                                     | CAM or<br>FAM-CAM<br>1x after surgery               | Mini-Cog<br>Stratified into a five-point<br>score<br>Stepwise                                        |
| Fisher and Flowerdew (1995) <sup>26</sup>   | P.Cohort<br>Elective Orthopedic<br>Dev: 80<br>Consecutive                                 | S: **<br>C: -<br>O: **<br>T: 4 stars     | Delirium<br>Dev: 14(17.5)                                                   | CAM<br>2xDaily                                      | Prediction Model using<br>two variables.<br>Stewpsie                                                 |
| Freter et al. (2005) <sup>28</sup>          | P.Cohort<br>Elective Hip surgery<br>Dev: 132<br>Consecutive                               | S: **<br>C: **<br>O: **<br>T: 6 stars    | Delirium<br>Dev: 18(14)                                                     | CAM<br>Daily                                        | Risk Stratification Model<br>(DEAR)<br>Built from literature                                         |
| Freter et al. (2005) <sup>48</sup>          | P.Cohort<br>Hip Fx<br>Dev: 100<br>Consecutive                                             | S: **<br>C: **<br>O: **<br>T: 6 stars    | Delirium<br>Dev: 24(24)                                                     | CAM<br>Daily                                        | Risk Stratification Model<br>(DEAR)                                                                  |
| Freter et al. (2015) <sup>27</sup>          | P.Cohort<br>Hip Fracture<br>Val: 283<br>Consecutive                                       | S: ***<br>C: -<br>O: **<br>T: 5 stars    | Delirium<br>Val: 119(42)                                                    | CAM<br>POD1, 3 & 5                                  | Risk stratification model<br>(DEAR)                                                                  |
| Inouye and Charpentier (1996) <sup>29</sup> | P.Cohort<br>Medical<br>Dev: 196<br>Val: 312<br>Consecutive                                | S: ****<br>C: **<br>O: ***<br>T: 9 stars | Delirium<br>Dev: 35(18)<br>Val: 47(15)                                      | CAM<br>Every other day                              | Risk stratification model<br>based on precipitating<br>factors<br>Backwards and forwards<br>stepwise |
| Inouye et al. (2007) <sup>31</sup>          | P.Cohort<br>Medical<br>Dev: 491<br>Val: 461<br>Consecutive                                | S: ****<br>C: **<br>O: ***<br>T: 9 stars | Delirium/ subsyndrome<br>delirium at discharge<br>Dev: 58(12)<br>Val: 28(6) | CAM<br>Every other day                              | Risk stratification model<br>Log-binomial regression                                                 |
| Inouye et la. (1993) <sup>30</sup>          | P.Cohort<br>Medical<br>Dev: 107<br>Val: 174<br>Consecutive                                | S: ****<br>C: **<br>O: ***<br>T: 9 stars | Delirium<br>Dev: 27(25)<br>Val: 29(17)                                      | CAM<br>Daily                                        | Risk stratification model<br>Forward stepwise                                                        |
| Isfandyaty et al. (2012) <sup>32</sup>      | Retro<br>Medical<br>Dev: 457<br>Convenience                                               | S: **<br>C: -<br>O: ***<br>T: 5 Stars    | Delirium<br>Dev: 87(19)                                                     | Undefined<br>Daily                                  | Risk<br>stratification model<br>Cox's proportional hazard                                            |
| Kalisvaart et al. (2006) <sup>34</sup>      | P.Cohort<br>Hip Surgery &<br>Fracture<br>Val: 603<br>Consecutive                          | S: ***<br>C: -<br>O: ***<br>T: 6 stars   | Delirium<br>Dev: 74(12)                                                     | CAM, DRS-98<br>Daily through POD5                   | Externally validated<br>Inouye's '93 model.                                                          |
| Kim et al. (2016) <sup>35</sup>             | P.Cohort<br>Major General                                                                 | S: ***<br>C: **                          | Delirium<br>Dev: 112(20)                                                    | Nu-Desc<br>-every shift by RNs                      | Risk stratification model<br>Backwards stepwise                                                      |



|                                            |                                                                                    |                                          |                                            |                                                                  |                                                                                        |
|--------------------------------------------|------------------------------------------------------------------------------------|------------------------------------------|--------------------------------------------|------------------------------------------------------------------|----------------------------------------------------------------------------------------|
|                                            | Surgery<br>Dev: 561<br>Val: 533<br>Not stated<br>Power analysis                    | O: ***<br>T: 8 stars                     | Val: 99(18)                                | Confirmed with<br>CAM.                                           |                                                                                        |
| Korc-Grodzicki et al. (2014) <sup>36</sup> | Retro<br>Oncological Surgery<br>Dev: 416<br>Convenience                            | S: ***<br>C: -<br>O: ***<br>T: 6 stars   | Delirium<br>Dev: 79(19)                    | CAM<br>Daily                                                     | Comprehensive Geriatric<br>Assessment (CGA) as<br>model.<br>Stepwise                   |
| Leung et al. (2013) <sup>37</sup>          | P.Cohort<br>Noncardiac surgery<br>Dev: 581<br>Not stated                           | S: ***<br>C: -<br>O: **<br>T: 5 stars    | Delirium<br>Dev: 234(40)                   | CAM<br>Daily                                                     | Risk stratification model<br>Stepwise                                                  |
| Liang et al. (2015) <sup>38</sup>          | P.Cohort<br>Elective Orthopedic<br>Surgery<br>Dev: 461<br>Consecutive              | S: ***<br>C: **<br>O: **<br>T: 7 stars   | Delirium<br>Dev: 37(8)                     | CAM<br>Daily<br>Confirmed by<br>psychologist<br>DSM-IV           | Built 2 DPMs<br>CGA<br>Risk stratification models<br>Backward stepwise                 |
| Maekawa et al. (2015) <sup>39</sup>        | P.Cohort<br>Oncological;<br>Gastrointestinal<br>Surgery<br>Dev: 517<br>Consecutive | S: **<br>C: *<br>O: ***<br>T: 6 stars    | Delirium<br>Dev: 124(24)                   | CAM<br>Unknown frequency                                         | Comprehensive Geriatric<br>Assessment (CGA) as<br>model.<br>Proportional hazards       |
| Martinez et al. (2012) <sup>40**</sup>     | P.Cohort<br>Medical<br>Dev: 397<br>Val: 302<br>Consecutive<br>Power analysis       | S: ***<br>C: -<br>O: **<br>T: 5 stars    | Delirium<br>Dev: 52(13)<br>Val: 76(25)     | CAM<br>Undefined                                                 | Clinical prediction rule<br>Multivariate<br>Recursive partitioning                     |
| Moerman et al. (2012) <sup>41</sup>        | P.Cohort<br>Hip Fracture<br>Val: 378<br>Consecutive<br>Power analysis              | S: ***<br>C: -<br>O: ***<br>T: 6 stars   | Delirium<br>Val: 102(27)                   | Ward RN<br>observation, 3xdaily<br>Confirmed by chart<br>review. | Risk stratification model<br>(Risk Model for Delirium,<br>RD)<br>Built from literature |
| O'Keeffe and Lavan (1996) <sup>42</sup>    | P.Cohort<br>Acute Geriatric Unit<br>Dev: 100<br>Ival: 84<br>Consecutive            | S: ****<br>C: -<br>O: **<br>T: 6 stars   | Delirium<br>Dev: 28(28)<br>IVal: 25(30)    | DAS<br>Every 48 hours<br><br>DSM III                             | Risk Stratification model<br>Stepwise                                                  |
| Pendlebury et al. (2016) <sup>49</sup>     | P. Cohort<br>Medical<br>Dev: 308<br>Consecutive                                    | S: ****<br>C: *<br>O: ***<br>T: 8 stars  | Delirium<br>Val: 95(31)                    | CAM<br>Every 48-hours<br><br>Confirmed by DSM-<br>IV interview   | Susceptibility Score<br>Built from literature                                          |
| Pendlebury et al. (2016) <sup>33</sup>     | P.Cohort<br>Medical<br>Val: 308<br>Consecutive<br>Power analysis                   | S: ****<br>C: -<br>O: ***<br>T: 7 stars  | Delirium<br>Val: 95(31)                    | CAM<br>Every 48-hours<br><br>Confirmed by DSM-<br>IV interview   | Externally validated 4<br>DPMs                                                         |
| Pompei et al. (1994) <sup>43</sup>         | P.Cohort<br>Med/surg<br>Dev: 432<br>V: 323<br>Not stated                           | S: ****<br>C: **<br>O: ***<br>T: 9 stars | Delirium<br>Dev: 64(14.8)<br>Val: 86(26.3) | CAM<br>2xweekly.<br>Confirmed with DSM<br>III                    | Risk stratification model<br>Stepwise                                                  |
| Rudolph et al. (2009) <sup>46</sup>        | P.Cohort<br>Cardiac Surgery<br>Dev: 122<br>V: 109<br>Not stated                    | S: ***<br>C: *<br>O: **<br>T: 6 stars    | Delirium<br>Dev: 63(52)<br>Val: 48(44)     | CAM, MDAS, DSI<br>Daily                                          | Risk stratification model<br>Backward stepwise                                         |
| Rudolph et al. (2011) <sup>45</sup>        | P.Cohort<br>Medical<br>V: 100<br>Consecutive                                       | S: ****<br>C: -<br>O: ***<br>T: 7 stars  | Delirium<br>Dev: 23(23)                    | DSM-IV<br>Daily clinical<br>interview                            | Externally validated<br>Inouye's '93 model.                                            |
| Rudolph et al. (2016) <sup>44</sup>        | Dev: Retro<br>Val: P.Cohort<br>Med/surg<br>Dev: 27625<br>Val: 246                  | S: ****<br>C: -<br>O: **<br>T: 6 stars   | Delirium<br>Dev: 2343(8)<br>Val: 64(26)    | Dev: Chart audit<br>Val: DSM-IV<br>Daily clinical<br>interview   | Risk stratification model<br>Built from literature                                     |

|  |             |  |  |  |
|--|-------------|--|--|--|
|  | Consecutive |  |  |  |
|--|-------------|--|--|--|

Key:  
 \*\*=Models developed in population  $\leq 60$  years of age, but validated in population  $\geq 60$  years of age.  
Study Design: P.Cohort=Prospective Cohort, Retro=Retrospective design. Dev=Development, Val=Validation. Med=Medical, Surg=Surgical. Power analysis = reported in identified study.  
Study Grade: NOS=Newcastle Ottawa Scale. S=Selection, C=Comparability, O=Ottawa. Max 9 stars.  
Outcome Variable: Dev=Development, Val=Validation  
Delirium Measurement: CAM=Confusion Assessment Method, DSM=Diagnostic Statistical Manual, POD=Postoperative Day, MDAS=Memorial Delirium Assessment Scale, Nu-Desc=Nursing Delirium Screening Scale, DRS-98=Delirium Rating Scale, EHR=Electronic Health Record  
Type of Model: How authors designed their delirium prediction model (DPM), statistical method used  
 -Risk stratification model: Points (weighted or un-weighted) assigned per predictive risk factor present.  
 -CGA=Comprehensive Geriatric Assessment  
**-Built from Literature: Authors selected risk factors for DPM based on literature review.**

### Delirium assessment

The outcome variable was measured using the Confusion Assessment Method in twenty-one studies.<sup>23 25-31 33-40 43 46-49</sup> The frequency of delirium assessment varied from two or more assessments daily (three studies)<sup>26 35 41</sup>, to once daily (twelve studies)<sup>25 28 30 32 34 36-38 44-46 48</sup>, every-other day (eight studies)<sup>23 27 29 31 33 42 43 49</sup>, once following surgery<sup>47</sup>, and undefined (three studies).<sup>24 39 40</sup> Of the studies that assessed delirium twice or more daily, all of these studies relied on ward nurse observations or telephone interview with the nurse to identify delirium symptoms.<sup>26 35 41</sup> The principal investigator confirmed the presence of delirium following the nurse report of symptoms.<sup>26 35</sup> Twenty-one studies used trained research or clinical personnel to conduct the delirium assessments.<sup>23 25-27 29-31 33-40 43-47 49</sup> Three studies relied on delirium diagnosis, or keywords designated as representing delirium, to identify the outcome measure through retrospective chart review.<sup>24 32 44</sup> Three studies relied on clinical staff to recognize and chart delirium symptoms.<sup>28 41 48</sup> One of these studies retrospectively confirmed the diagnosis of delirium through consensus review of two authors, disagreement was resolved by a psychiatrist.<sup>41</sup> One study did not report details on personnel performing delirium assessments.<sup>42</sup>

### Model design and statistical methods

Various statistical techniques were employed by the twenty-three included studies. Twelve used univariate or bivariate analyses and selected variables with a pre-determined statistical value

(range for  $p < 0.05$  to  $p < 0.25$ ) for inclusion in the model.<sup>23-26 32 35-37 40 42 43 46</sup> Five of these models paired bivariate analyses with a bootstrapping technique to address lower sample and event size.<sup>24 25 37 38 46</sup> Four models based their variable selection from a literature review of risk factors for delirium.<sup>27 28 41 44 48</sup> Two used proportional hazards regression modeling paired with bivariate analyses and included variables with either a  $p$ -value  $< 0.25$ <sup>32</sup> or a relative risk of  $\geq 1.5$ .<sup>30</sup> Six studies published their power analysis.<sup>24 25 33 35 40 41</sup> Sixteen studies employed a form of logistic regression. Twelve of these models applied a stepwise regression approach.<sup>23 25 26 29 30 35-37 42 43 46</sup> <sup>47</sup> Three applied a stepwise forward selection process,<sup>23 25 30</sup> two employed a stepwise backward selection process<sup>35 46</sup> and one used a combined approach.<sup>29</sup> Statistical methods used for model building are further outlined in Table 1.

Per TRIPOD reporting guidelines, validation studies were categorized into type; narrow validation refers to the same investigators subsequently collecting an additional patient cohort, following the development cohort, and broad validation refers to a validation cohort sampled from a different hospital or country.<sup>50-52</sup> As interpretation of validation studies is dependent on case-mix,<sup>53</sup> it is important to note that eight of the fourteen externally validated models are categorized as narrow validations.<sup>23 27 29-31 35 41 46</sup> Further information is outlined in Table 2.

## Variables

Figure 3 demonstrates the frequency of variable use in the fourteen externally validated delirium prediction models. Baseline cognitive impairment was the most frequently used variable. Six models defined baseline cognitive impairment as a cognitive test score at or below the level of dementia.<sup>27 30 34 43 49</sup> This cognitive test was administered upon study enrollment or extracted from past medical records.<sup>49</sup> Two studies additionally evaluated chronic cognitive impairment through family or caregiver interview with the modified Blessed Dementia Rating Scale

(mBDRS).<sup>30 31</sup> Four models combined the cognitive test score derived upon enrollment with a history of dementia to define baseline cognitive impairment.<sup>31 33 41 44</sup> History of dementia was defined as follows: Two studies-family or caregiver report supplemented with documented history in medical record<sup>33 41</sup>, one study-medical record review and interview with mBDRS<sup>31</sup>, and one study-dementia billing codes or prescription information.<sup>44</sup> One study defined baseline cognitive impairment as a pre-specified key term in the electronic health.<sup>45</sup> Table 2 details cognitive tests used in the externally validated delirium prediction models.

Functional impairment was defined as follows: (1) needing assistance with any basic ADL,<sup>27</sup> (1) domestic help, help with meals or physical care<sup>41</sup> and (2) residence in nursing facility or at home with caregivers.<sup>33</sup> Two studies used validated functional assessment tools (iADL and Barthel Index) and evaluated functional status two weeks prior to hospitalization.<sup>23 31</sup>

Externally validated delirium prediction models are detailed in Table 2.

| External Validated DPM Name                     | Citation<br>Type of Validation                       | Delirium #(%)                                                                                     | Sens<br>Spec<br>PPV<br>NPV<br>(external)                                                                                                           | AUROC (95%CI)                                                                                                                                                                      | Model Components                                                                                                                                                                                                                            | Cog. Assess Tool & Cutoff |
|-------------------------------------------------|------------------------------------------------------|---------------------------------------------------------------------------------------------------|----------------------------------------------------------------------------------------------------------------------------------------------------|------------------------------------------------------------------------------------------------------------------------------------------------------------------------------------|---------------------------------------------------------------------------------------------------------------------------------------------------------------------------------------------------------------------------------------------|---------------------------|
| <b>AWOL Tool</b>                                | Pendlebury et al. (2016) <sup>33</sup><br>Broad_val. | 1st Val: 14(9)<br>2 <sup>nd</sup> Val:<br>95(31)<br>(any delirium)<br>67-prevalent<br>28-incident | Mod. AWOL<br>Cutoff - 3<br>Any Delirium<br>Sens .7<br>Spec .66<br>PPV .55<br>NPV .79<br>Incident Del<br>Sens .76<br>Spec .66<br>PPV .27<br>NPV .94 | 1 <sup>st</sup> Val:<br>0.69<br>(0.54-0.83)<br>Incident delirium<br>2 <sup>nd</sup> Val:<br>Cohort 1<br>(MMSE)<br>0.78<br>(0.68-0.88)<br>Cohort 2<br>(AMTS)<br>0.73<br>(0.63-0.83) | Original AWOL Tool<br>Age >80 1 pt<br>Failure to spell WORLD backwards 1 pt<br>Disorientation 1 pt<br>Illness Severity 1 pt<br>Modified AWOL Tool<br>Age >80 1 pt<br>Diag of Dementia 1 pt<br>MMSE<24, AMTS<9 1 pt<br>Illness severity 1 pt | MMSE < 24<br>AMTS < 9     |
| <b>Clinical Prediction Rule-Cardiac Surgery</b> | Rudolph et al. (2009) <sup>46</sup><br>Narrow val.   | Dev: 63(52)<br>Val: 48(44)<br><br>(incident delirium)                                             | Not reported                                                                                                                                       | Dev: 0.74<br>Val: 0.75<br><br>Did not report CI                                                                                                                                    | Weighted Points-Regression<br>MMSE ≤ 23 2 pt<br>MMSE 24-27 1 pt<br>Hx of Stroke/TIA 1 pt<br>GDS >4 1 pt<br>Abnormal Albumin 1 pt<br>Stratified into point categories<br>0 pt<br>1 pt                                                        | MMSE -Stratified score    |

|                                               |                                                         |                                                                               |                                                                                                              |                                                                                                    |                                                                                                                                                                                                                                                                                                                                                         |                                                                                        |
|-----------------------------------------------|---------------------------------------------------------|-------------------------------------------------------------------------------|--------------------------------------------------------------------------------------------------------------|----------------------------------------------------------------------------------------------------|---------------------------------------------------------------------------------------------------------------------------------------------------------------------------------------------------------------------------------------------------------------------------------------------------------------------------------------------------------|----------------------------------------------------------------------------------------|
|                                               |                                                         |                                                                               |                                                                                                              |                                                                                                    | 2 pts<br>≥ 3 pts – High risk group<br>RR in High risk group: 4.9 (3.8-6.2)                                                                                                                                                                                                                                                                              |                                                                                        |
| <b>DEAR</b>                                   | Freter et al. (2015) <sup>27</sup><br><br>Narrow val.   | Dev: (2005) 18(14)<br><br>Val: (2015) Pre-Op= 163(58)<br><br>Post-op= 118(42) | Sens .68<br>Spec .73<br>PPV .65<br>NPV .76<br>Optimal cut-off score: 3pts<br><br>(Incident post-op delirium) | Dev: (2005) 0.77 (0.64-0.87)<br><br>Val: (2015) AUROC Not published                                | MMSE ≤ 23<br>Functional dependence 1 pt<br>Sensory impairment 1 pt<br>Substance use 1 pt<br>Age >80 1 pt<br><br>Not weighted.<br>0-5 Score, cut-off of 3 indicating high risk.                                                                                                                                                                          | MMSE Cut-off ≤ 23                                                                      |
| <b>Delirium at Discharge Prediction Model</b> | Inouye et al. (2007) <sup>31</sup><br><br>Narrow val.   | Dev: 58(12)<br>Val: 28(6)<br><br>(incident delirium)                          | Not reported                                                                                                 | Dev: 0.80<br>Val: 0.75<br><br>Did not report CI<br><br>Calibration: $\chi^2$ trend-<br>$p < 0.001$ | Delirium at Discharge Prediction<br>Dementia diagnosis or mBDRS ≥ 4 1 pt<br>Vision Impairment 1 pt<br>ADL Impairment 1 pt<br>Charlson Score 1 pt<br>Restraint use during delirium 1 pt<br><br>Not weighted.<br>0-1 pt = Low Risk<br>2-3 pt = Intermediate Risk<br>4-5 pt = High Risk<br><br>RR in High risk group: 10.2(3.2-32.7)                       | MMSE < 24<br>mBDR ≥ 4                                                                  |
| <b>Delirium Prediction Score (DPS)</b>        | Carrasco et al. (2014) <sup>23</sup><br><br>Narrow val. | Dev: 25(.06)<br>Val: 12(12)<br><br>(incident delirium)                        | Sens .88<br>Spec .74<br>PPV .22<br>NPV .99                                                                   | Dev: 0.86 (0.82-0.91)<br><br>Val: 0.78 (0.66-0.90)                                                 | DPS=[5x(BUN/Cr ratio)]-(3xBarthel Index).<br>Cut off is:<br>> -240 = High risk for Delirium<br>In conventional units, cut-off is:<br>> -160 = High Risk for Delirium                                                                                                                                                                                    | None.<br><br>Pfeffer Functional Activities Questionnaire as a proxy for prior dementia |
| <b>Delphi Score</b>                           | Kim et al. (2016) <sup>35</sup><br><br>Narrow val.      | Dev: 112(20)<br>Val: 99(18)<br><br>(incident delirium)                        | Sens .81<br>Spec .93<br>PPV .70<br>NPV .96<br><br>Optimal cut-off score: 6.5pts                              | Dev: 0.911 (0.88-0.94)<br><br>Val: 0.938 (0.91-0.97)                                               | Age (years)<br>60-69 0<br>70-79 1<br>≥80 2<br>Low Physical Activity<br>Self-sufficient 0<br>Need assist. 2<br>Heavy ETOH<br>No 0<br>Yes 1<br>Hearing Impairment<br>No 0<br>Yes 1<br>History of delirium<br>No 0<br>Yes 2<br>Emergency Surgery<br>No 0<br>Yes 1<br>Open Surgery<br>No 0<br>Yes 2<br>ICU Admission<br>No 0<br>Yes 3<br>Pre-Op CRP (mg/dL) | No measure of cognition.<br><br>Excluded participants if MMSE < 24                     |

|                                                                                                       |                                           |                                                                                                                                                                                                                                                                                                                                                                                                                                                                                                                                                                                                                                                                                                                                                                                       |                                            |                                                                                                 |                                                                                                                                                                                                                                                                                                                                                                                                                                                  | <table border="1"> <tr> <td>&lt;10</td> <td>0</td> </tr> <tr> <td>≥10</td> <td>1</td> </tr> </table> <p>Max points: 15<br/>Optimal cut-off: 6.5<br/>High Risk: ≥7 points</p>                                                                  | <10                                                                                                   | 0                                                                | ≥10  | 1                                                           |      |                   |                    |                              |  |  |  |          |      |             |     |     |       |      |             |     |     |      |      |             |     |     |      |      |             |     |     |                                                                                                                                                                                                                                                                                                                                                                                                                                                                                                                                                                                                                       |                    |  |            |      |                                 |  |            |      |            |      |           |      |          |      |        |      |                |      |                    |
|-------------------------------------------------------------------------------------------------------|-------------------------------------------|---------------------------------------------------------------------------------------------------------------------------------------------------------------------------------------------------------------------------------------------------------------------------------------------------------------------------------------------------------------------------------------------------------------------------------------------------------------------------------------------------------------------------------------------------------------------------------------------------------------------------------------------------------------------------------------------------------------------------------------------------------------------------------------|--------------------------------------------|-------------------------------------------------------------------------------------------------|--------------------------------------------------------------------------------------------------------------------------------------------------------------------------------------------------------------------------------------------------------------------------------------------------------------------------------------------------------------------------------------------------------------------------------------------------|-----------------------------------------------------------------------------------------------------------------------------------------------------------------------------------------------------------------------------------------------|-------------------------------------------------------------------------------------------------------|------------------------------------------------------------------|------|-------------------------------------------------------------|------|-------------------|--------------------|------------------------------|--|--|--|----------|------|-------------|-----|-----|-------|------|-------------|-----|-----|------|------|-------------|-----|-----|------|------|-------------|-----|-----|-----------------------------------------------------------------------------------------------------------------------------------------------------------------------------------------------------------------------------------------------------------------------------------------------------------------------------------------------------------------------------------------------------------------------------------------------------------------------------------------------------------------------------------------------------------------------------------------------------------------------|--------------------|--|------------|------|---------------------------------|--|------------|------|------------|------|-----------|------|----------|------|--------|------|----------------|------|--------------------|
| <10                                                                                                   | 0                                         |                                                                                                                                                                                                                                                                                                                                                                                                                                                                                                                                                                                                                                                                                                                                                                                       |                                            |                                                                                                 |                                                                                                                                                                                                                                                                                                                                                                                                                                                  |                                                                                                                                                                                                                                               |                                                                                                       |                                                                  |      |                                                             |      |                   |                    |                              |  |  |  |          |      |             |     |     |       |      |             |     |     |      |      |             |     |     |      |      |             |     |     |                                                                                                                                                                                                                                                                                                                                                                                                                                                                                                                                                                                                                       |                    |  |            |      |                                 |  |            |      |            |      |           |      |          |      |        |      |                |      |                    |
| ≥10                                                                                                   | 1                                         |                                                                                                                                                                                                                                                                                                                                                                                                                                                                                                                                                                                                                                                                                                                                                                                       |                                            |                                                                                                 |                                                                                                                                                                                                                                                                                                                                                                                                                                                  |                                                                                                                                                                                                                                               |                                                                                                       |                                                                  |      |                                                             |      |                   |                    |                              |  |  |  |          |      |             |     |     |       |      |             |     |     |      |      |             |     |     |      |      |             |     |     |                                                                                                                                                                                                                                                                                                                                                                                                                                                                                                                                                                                                                       |                    |  |            |      |                                 |  |            |      |            |      |           |      |          |      |        |      |                |      |                    |
| <b>e-NICE Rule</b>                                                                                    | <b>Rudolph et al. (2016)<sup>44</sup></b> | <table border="1"> <thead> <tr> <th>Cohort</th> <th>AUROC</th> <th>CI</th> <th>TPR</th> <th>FPR</th> </tr> </thead> <tbody> <tr> <td>Dev</td> <td>0.81</td> <td>(0.80-0.82)</td> <td></td> <td></td> </tr> <tr> <td colspan="5">Validation AUROCs*</td> </tr> <tr> <td>Original</td> <td>0.69</td> <td>(0.61-0.77)</td> <td>64%</td> <td>33%</td> </tr> <tr> <td>mRASS</td> <td>0.72</td> <td>(0.65-0.79)</td> <td>69%</td> <td>35%</td> </tr> <tr> <td>TMYB</td> <td>0.73</td> <td>(0.66-0.80)</td> <td>78%</td> <td>43%</td> </tr> <tr> <td>MoCA</td> <td>0.74</td> <td>(0.66-0.81)</td> <td>75%</td> <td>43%</td> </tr> </tbody> </table> <p>*Any delirium</p> <p>Original model-AUROC of 0.68 (95%CI 0.59-0.77) in incident delirium.<br/>Did not report sens, spec, PPV, NPV</p> | Cohort                                     | AUROC                                                                                           | CI                                                                                                                                                                                                                                                                                                                                                                                                                                               | TPR                                                                                                                                                                                                                                           | FPR                                                                                                   | Dev                                                              | 0.81 | (0.80-0.82)                                                 |      |                   | Validation AUROCs* |                              |  |  |  | Original | 0.69 | (0.61-0.77) | 64% | 33% | mRASS | 0.72 | (0.65-0.79) | 69% | 35% | TMYB | 0.73 | (0.66-0.80) | 78% | 43% | MoCA | 0.74 | (0.66-0.81) | 75% | 43% | <table border="1"> <thead> <tr> <th colspan="2">Weighted Points/OR</th> </tr> </thead> <tbody> <tr> <td>Cog impair</td> <td>4 pt</td> </tr> <tr> <td>-Medications, diagnosis or both</td> <td></td> </tr> <tr> <td>Age ≥ 65 y</td> <td>2 pt</td> </tr> <tr> <td>Age ≥ 80 y</td> <td>3 pt</td> </tr> <tr> <td>Infection</td> <td>2 pt</td> </tr> <tr> <td>Fracture</td> <td>4 pt</td> </tr> <tr> <td>Vision</td> <td>1 pt</td> </tr> <tr> <td>Severe Illness</td> <td>2 pt</td> </tr> </tbody> </table> <p>0-2 pts = Low Risk<br/>2-5 pts = Intermediate Risk<br/>6-8 pts = High Risk<br/>≥ 9 pts = Very High Risk</p> | Weighted Points/OR |  | Cog impair | 4 pt | -Medications, diagnosis or both |  | Age ≥ 65 y | 2 pt | Age ≥ 80 y | 3 pt | Infection | 2 pt | Fracture | 4 pt | Vision | 1 pt | Severe Illness | 2 pt | <b>e-NICE Tool</b> |
| Cohort                                                                                                | AUROC                                     | CI                                                                                                                                                                                                                                                                                                                                                                                                                                                                                                                                                                                                                                                                                                                                                                                    | TPR                                        | FPR                                                                                             |                                                                                                                                                                                                                                                                                                                                                                                                                                                  |                                                                                                                                                                                                                                               |                                                                                                       |                                                                  |      |                                                             |      |                   |                    |                              |  |  |  |          |      |             |     |     |       |      |             |     |     |      |      |             |     |     |      |      |             |     |     |                                                                                                                                                                                                                                                                                                                                                                                                                                                                                                                                                                                                                       |                    |  |            |      |                                 |  |            |      |            |      |           |      |          |      |        |      |                |      |                    |
| Dev                                                                                                   | 0.81                                      | (0.80-0.82)                                                                                                                                                                                                                                                                                                                                                                                                                                                                                                                                                                                                                                                                                                                                                                           |                                            |                                                                                                 |                                                                                                                                                                                                                                                                                                                                                                                                                                                  |                                                                                                                                                                                                                                               |                                                                                                       |                                                                  |      |                                                             |      |                   |                    |                              |  |  |  |          |      |             |     |     |       |      |             |     |     |      |      |             |     |     |      |      |             |     |     |                                                                                                                                                                                                                                                                                                                                                                                                                                                                                                                                                                                                                       |                    |  |            |      |                                 |  |            |      |            |      |           |      |          |      |        |      |                |      |                    |
| Validation AUROCs*                                                                                    |                                           |                                                                                                                                                                                                                                                                                                                                                                                                                                                                                                                                                                                                                                                                                                                                                                                       |                                            |                                                                                                 |                                                                                                                                                                                                                                                                                                                                                                                                                                                  |                                                                                                                                                                                                                                               |                                                                                                       |                                                                  |      |                                                             |      |                   |                    |                              |  |  |  |          |      |             |     |     |       |      |             |     |     |      |      |             |     |     |      |      |             |     |     |                                                                                                                                                                                                                                                                                                                                                                                                                                                                                                                                                                                                                       |                    |  |            |      |                                 |  |            |      |            |      |           |      |          |      |        |      |                |      |                    |
| Original                                                                                              | 0.69                                      | (0.61-0.77)                                                                                                                                                                                                                                                                                                                                                                                                                                                                                                                                                                                                                                                                                                                                                                           | 64%                                        | 33%                                                                                             |                                                                                                                                                                                                                                                                                                                                                                                                                                                  |                                                                                                                                                                                                                                               |                                                                                                       |                                                                  |      |                                                             |      |                   |                    |                              |  |  |  |          |      |             |     |     |       |      |             |     |     |      |      |             |     |     |      |      |             |     |     |                                                                                                                                                                                                                                                                                                                                                                                                                                                                                                                                                                                                                       |                    |  |            |      |                                 |  |            |      |            |      |           |      |          |      |        |      |                |      |                    |
| mRASS                                                                                                 | 0.72                                      | (0.65-0.79)                                                                                                                                                                                                                                                                                                                                                                                                                                                                                                                                                                                                                                                                                                                                                                           | 69%                                        | 35%                                                                                             |                                                                                                                                                                                                                                                                                                                                                                                                                                                  |                                                                                                                                                                                                                                               |                                                                                                       |                                                                  |      |                                                             |      |                   |                    |                              |  |  |  |          |      |             |     |     |       |      |             |     |     |      |      |             |     |     |      |      |             |     |     |                                                                                                                                                                                                                                                                                                                                                                                                                                                                                                                                                                                                                       |                    |  |            |      |                                 |  |            |      |            |      |           |      |          |      |        |      |                |      |                    |
| TMYB                                                                                                  | 0.73                                      | (0.66-0.80)                                                                                                                                                                                                                                                                                                                                                                                                                                                                                                                                                                                                                                                                                                                                                                           | 78%                                        | 43%                                                                                             |                                                                                                                                                                                                                                                                                                                                                                                                                                                  |                                                                                                                                                                                                                                               |                                                                                                       |                                                                  |      |                                                             |      |                   |                    |                              |  |  |  |          |      |             |     |     |       |      |             |     |     |      |      |             |     |     |      |      |             |     |     |                                                                                                                                                                                                                                                                                                                                                                                                                                                                                                                                                                                                                       |                    |  |            |      |                                 |  |            |      |            |      |           |      |          |      |        |      |                |      |                    |
| MoCA                                                                                                  | 0.74                                      | (0.66-0.81)                                                                                                                                                                                                                                                                                                                                                                                                                                                                                                                                                                                                                                                                                                                                                                           | 75%                                        | 43%                                                                                             |                                                                                                                                                                                                                                                                                                                                                                                                                                                  |                                                                                                                                                                                                                                               |                                                                                                       |                                                                  |      |                                                             |      |                   |                    |                              |  |  |  |          |      |             |     |     |       |      |             |     |     |      |      |             |     |     |      |      |             |     |     |                                                                                                                                                                                                                                                                                                                                                                                                                                                                                                                                                                                                                       |                    |  |            |      |                                 |  |            |      |            |      |           |      |          |      |        |      |                |      |                    |
| Weighted Points/OR                                                                                    |                                           |                                                                                                                                                                                                                                                                                                                                                                                                                                                                                                                                                                                                                                                                                                                                                                                       |                                            |                                                                                                 |                                                                                                                                                                                                                                                                                                                                                                                                                                                  |                                                                                                                                                                                                                                               |                                                                                                       |                                                                  |      |                                                             |      |                   |                    |                              |  |  |  |          |      |             |     |     |       |      |             |     |     |      |      |             |     |     |      |      |             |     |     |                                                                                                                                                                                                                                                                                                                                                                                                                                                                                                                                                                                                                       |                    |  |            |      |                                 |  |            |      |            |      |           |      |          |      |        |      |                |      |                    |
| Cog impair                                                                                            | 4 pt                                      |                                                                                                                                                                                                                                                                                                                                                                                                                                                                                                                                                                                                                                                                                                                                                                                       |                                            |                                                                                                 |                                                                                                                                                                                                                                                                                                                                                                                                                                                  |                                                                                                                                                                                                                                               |                                                                                                       |                                                                  |      |                                                             |      |                   |                    |                              |  |  |  |          |      |             |     |     |       |      |             |     |     |      |      |             |     |     |      |      |             |     |     |                                                                                                                                                                                                                                                                                                                                                                                                                                                                                                                                                                                                                       |                    |  |            |      |                                 |  |            |      |            |      |           |      |          |      |        |      |                |      |                    |
| -Medications, diagnosis or both                                                                       |                                           |                                                                                                                                                                                                                                                                                                                                                                                                                                                                                                                                                                                                                                                                                                                                                                                       |                                            |                                                                                                 |                                                                                                                                                                                                                                                                                                                                                                                                                                                  |                                                                                                                                                                                                                                               |                                                                                                       |                                                                  |      |                                                             |      |                   |                    |                              |  |  |  |          |      |             |     |     |       |      |             |     |     |      |      |             |     |     |      |      |             |     |     |                                                                                                                                                                                                                                                                                                                                                                                                                                                                                                                                                                                                                       |                    |  |            |      |                                 |  |            |      |            |      |           |      |          |      |        |      |                |      |                    |
| Age ≥ 65 y                                                                                            | 2 pt                                      |                                                                                                                                                                                                                                                                                                                                                                                                                                                                                                                                                                                                                                                                                                                                                                                       |                                            |                                                                                                 |                                                                                                                                                                                                                                                                                                                                                                                                                                                  |                                                                                                                                                                                                                                               |                                                                                                       |                                                                  |      |                                                             |      |                   |                    |                              |  |  |  |          |      |             |     |     |       |      |             |     |     |      |      |             |     |     |      |      |             |     |     |                                                                                                                                                                                                                                                                                                                                                                                                                                                                                                                                                                                                                       |                    |  |            |      |                                 |  |            |      |            |      |           |      |          |      |        |      |                |      |                    |
| Age ≥ 80 y                                                                                            | 3 pt                                      |                                                                                                                                                                                                                                                                                                                                                                                                                                                                                                                                                                                                                                                                                                                                                                                       |                                            |                                                                                                 |                                                                                                                                                                                                                                                                                                                                                                                                                                                  |                                                                                                                                                                                                                                               |                                                                                                       |                                                                  |      |                                                             |      |                   |                    |                              |  |  |  |          |      |             |     |     |       |      |             |     |     |      |      |             |     |     |      |      |             |     |     |                                                                                                                                                                                                                                                                                                                                                                                                                                                                                                                                                                                                                       |                    |  |            |      |                                 |  |            |      |            |      |           |      |          |      |        |      |                |      |                    |
| Infection                                                                                             | 2 pt                                      |                                                                                                                                                                                                                                                                                                                                                                                                                                                                                                                                                                                                                                                                                                                                                                                       |                                            |                                                                                                 |                                                                                                                                                                                                                                                                                                                                                                                                                                                  |                                                                                                                                                                                                                                               |                                                                                                       |                                                                  |      |                                                             |      |                   |                    |                              |  |  |  |          |      |             |     |     |       |      |             |     |     |      |      |             |     |     |      |      |             |     |     |                                                                                                                                                                                                                                                                                                                                                                                                                                                                                                                                                                                                                       |                    |  |            |      |                                 |  |            |      |            |      |           |      |          |      |        |      |                |      |                    |
| Fracture                                                                                              | 4 pt                                      |                                                                                                                                                                                                                                                                                                                                                                                                                                                                                                                                                                                                                                                                                                                                                                                       |                                            |                                                                                                 |                                                                                                                                                                                                                                                                                                                                                                                                                                                  |                                                                                                                                                                                                                                               |                                                                                                       |                                                                  |      |                                                             |      |                   |                    |                              |  |  |  |          |      |             |     |     |       |      |             |     |     |      |      |             |     |     |      |      |             |     |     |                                                                                                                                                                                                                                                                                                                                                                                                                                                                                                                                                                                                                       |                    |  |            |      |                                 |  |            |      |            |      |           |      |          |      |        |      |                |      |                    |
| Vision                                                                                                | 1 pt                                      |                                                                                                                                                                                                                                                                                                                                                                                                                                                                                                                                                                                                                                                                                                                                                                                       |                                            |                                                                                                 |                                                                                                                                                                                                                                                                                                                                                                                                                                                  |                                                                                                                                                                                                                                               |                                                                                                       |                                                                  |      |                                                             |      |                   |                    |                              |  |  |  |          |      |             |     |     |       |      |             |     |     |      |      |             |     |     |      |      |             |     |     |                                                                                                                                                                                                                                                                                                                                                                                                                                                                                                                                                                                                                       |                    |  |            |      |                                 |  |            |      |            |      |           |      |          |      |        |      |                |      |                    |
| Severe Illness                                                                                        | 2 pt                                      |                                                                                                                                                                                                                                                                                                                                                                                                                                                                                                                                                                                                                                                                                                                                                                                       |                                            |                                                                                                 |                                                                                                                                                                                                                                                                                                                                                                                                                                                  |                                                                                                                                                                                                                                               |                                                                                                       |                                                                  |      |                                                             |      |                   |                    |                              |  |  |  |          |      |             |     |     |       |      |             |     |     |      |      |             |     |     |      |      |             |     |     |                                                                                                                                                                                                                                                                                                                                                                                                                                                                                                                                                                                                                       |                    |  |            |      |                                 |  |            |      |            |      |           |      |          |      |        |      |                |      |                    |
|                                                                                                       |                                           |                                                                                                                                                                                                                                                                                                                                                                                                                                                                                                                                                                                                                                                                                                                                                                                       |                                            |                                                                                                 |                                                                                                                                                                                                                                                                                                                                                                                                                                                  | <table border="1"> <tr> <td>Diagnosis of dementia, medications for dementia or both qualified as "cognitive impairment" in model.</td> </tr> <tr> <td>Prospective cohort, additional:<br/>-mRASS<br/>-TMYB<br/>-MoCA ≤ 18</td> </tr> </table> | Diagnosis of dementia, medications for dementia or both qualified as "cognitive impairment" in model. | Prospective cohort, additional:<br>-mRASS<br>-TMYB<br>-MoCA ≤ 18 |      |                                                             |      |                   |                    |                              |  |  |  |          |      |             |     |     |       |      |             |     |     |      |      |             |     |     |      |      |             |     |     |                                                                                                                                                                                                                                                                                                                                                                                                                                                                                                                                                                                                                       |                    |  |            |      |                                 |  |            |      |            |      |           |      |          |      |        |      |                |      |                    |
| Diagnosis of dementia, medications for dementia or both qualified as "cognitive impairment" in model. |                                           |                                                                                                                                                                                                                                                                                                                                                                                                                                                                                                                                                                                                                                                                                                                                                                                       |                                            |                                                                                                 |                                                                                                                                                                                                                                                                                                                                                                                                                                                  |                                                                                                                                                                                                                                               |                                                                                                       |                                                                  |      |                                                             |      |                   |                    |                              |  |  |  |          |      |             |     |     |       |      |             |     |     |      |      |             |     |     |      |      |             |     |     |                                                                                                                                                                                                                                                                                                                                                                                                                                                                                                                                                                                                                       |                    |  |            |      |                                 |  |            |      |            |      |           |      |          |      |        |      |                |      |                    |
| Prospective cohort, additional:<br>-mRASS<br>-TMYB<br>-MoCA ≤ 18                                      |                                           |                                                                                                                                                                                                                                                                                                                                                                                                                                                                                                                                                                                                                                                                                                                                                                                       |                                            |                                                                                                 |                                                                                                                                                                                                                                                                                                                                                                                                                                                  |                                                                                                                                                                                                                                               |                                                                                                       |                                                                  |      |                                                             |      |                   |                    |                              |  |  |  |          |      |             |     |     |       |      |             |     |     |      |      |             |     |     |      |      |             |     |     |                                                                                                                                                                                                                                                                                                                                                                                                                                                                                                                                                                                                                       |                    |  |            |      |                                 |  |            |      |            |      |           |      |          |      |        |      |                |      |                    |
| <b>Inouye Prediction Rule (IPR)</b>                                                                   | Inouye et al. (1993) <sup>30</sup>        | Dev: 27(25)<br>Val: 29(17)                                                                                                                                                                                                                                                                                                                                                                                                                                                                                                                                                                                                                                                                                                                                                            | Did not report                             | Dev: 0.74 (0.63-0.85)<br>Val: 0.66 (0.55-0.77)                                                  | <table border="1"> <tr> <td>Baseline cognitive impairment</td> <td>1 pt</td> </tr> <tr> <td>High BUN/Cr ratio</td> <td>1 pt</td> </tr> <tr> <td>Severe illness (Composite score: APACHE II &gt;16 + RN rating)</td> <td>1 pt</td> </tr> <tr> <td>Vision impairment</td> <td>1 pt</td> </tr> </table> <p>Not weighted.<br/>0 pts = Low risk<br/>1-2 pts = Intermediate risk<br/>3-4 pts = High risk</p> <p>RR in High Risk group: 9.5 (no CI)</p> | Baseline cognitive impairment                                                                                                                                                                                                                 | 1 pt                                                                                                  | High BUN/Cr ratio                                                | 1 pt | Severe illness (Composite score: APACHE II >16 + RN rating) | 1 pt | Vision impairment | 1 pt               | MMSE Cut-off < 24            |  |  |  |          |      |             |     |     |       |      |             |     |     |      |      |             |     |     |      |      |             |     |     |                                                                                                                                                                                                                                                                                                                                                                                                                                                                                                                                                                                                                       |                    |  |            |      |                                 |  |            |      |            |      |           |      |          |      |        |      |                |      |                    |
| Baseline cognitive impairment                                                                         | 1 pt                                      |                                                                                                                                                                                                                                                                                                                                                                                                                                                                                                                                                                                                                                                                                                                                                                                       |                                            |                                                                                                 |                                                                                                                                                                                                                                                                                                                                                                                                                                                  |                                                                                                                                                                                                                                               |                                                                                                       |                                                                  |      |                                                             |      |                   |                    |                              |  |  |  |          |      |             |     |     |       |      |             |     |     |      |      |             |     |     |      |      |             |     |     |                                                                                                                                                                                                                                                                                                                                                                                                                                                                                                                                                                                                                       |                    |  |            |      |                                 |  |            |      |            |      |           |      |          |      |        |      |                |      |                    |
| High BUN/Cr ratio                                                                                     | 1 pt                                      |                                                                                                                                                                                                                                                                                                                                                                                                                                                                                                                                                                                                                                                                                                                                                                                       |                                            |                                                                                                 |                                                                                                                                                                                                                                                                                                                                                                                                                                                  |                                                                                                                                                                                                                                               |                                                                                                       |                                                                  |      |                                                             |      |                   |                    |                              |  |  |  |          |      |             |     |     |       |      |             |     |     |      |      |             |     |     |      |      |             |     |     |                                                                                                                                                                                                                                                                                                                                                                                                                                                                                                                                                                                                                       |                    |  |            |      |                                 |  |            |      |            |      |           |      |          |      |        |      |                |      |                    |
| Severe illness (Composite score: APACHE II >16 + RN rating)                                           | 1 pt                                      |                                                                                                                                                                                                                                                                                                                                                                                                                                                                                                                                                                                                                                                                                                                                                                                       |                                            |                                                                                                 |                                                                                                                                                                                                                                                                                                                                                                                                                                                  |                                                                                                                                                                                                                                               |                                                                                                       |                                                                  |      |                                                             |      |                   |                    |                              |  |  |  |          |      |             |     |     |       |      |             |     |     |      |      |             |     |     |      |      |             |     |     |                                                                                                                                                                                                                                                                                                                                                                                                                                                                                                                                                                                                                       |                    |  |            |      |                                 |  |            |      |            |      |           |      |          |      |        |      |                |      |                    |
| Vision impairment                                                                                     | 1 pt                                      |                                                                                                                                                                                                                                                                                                                                                                                                                                                                                                                                                                                                                                                                                                                                                                                       |                                            |                                                                                                 |                                                                                                                                                                                                                                                                                                                                                                                                                                                  |                                                                                                                                                                                                                                               |                                                                                                       |                                                                  |      |                                                             |      |                   |                    |                              |  |  |  |          |      |             |     |     |       |      |             |     |     |      |      |             |     |     |      |      |             |     |     |                                                                                                                                                                                                                                                                                                                                                                                                                                                                                                                                                                                                                       |                    |  |            |      |                                 |  |            |      |            |      |           |      |          |      |        |      |                |      |                    |
|                                                                                                       | Narrow val.                               | (incident delirium)                                                                                                                                                                                                                                                                                                                                                                                                                                                                                                                                                                                                                                                                                                                                                                   |                                            | Calibration:<br>Dev:<br>$\chi^2$ Trend<br>$p < 0.0001$<br>Val:<br>$\chi^2$ Trend<br>$p < 0.002$ |                                                                                                                                                                                                                                                                                                                                                                                                                                                  | Family/care giver bDRS                                                                                                                                                                                                                        |                                                                                                       |                                                                  |      |                                                             |      |                   |                    |                              |  |  |  |          |      |             |     |     |       |      |             |     |     |      |      |             |     |     |      |      |             |     |     |                                                                                                                                                                                                                                                                                                                                                                                                                                                                                                                                                                                                                       |                    |  |            |      |                                 |  |            |      |            |      |           |      |          |      |        |      |                |      |                    |
|                                                                                                       |                                           |                                                                                                                                                                                                                                                                                                                                                                                                                                                                                                                                                                                                                                                                                                                                                                                       |                                            |                                                                                                 |                                                                                                                                                                                                                                                                                                                                                                                                                                                  | Excluded those w/history of severe dementia                                                                                                                                                                                                   |                                                                                                       |                                                                  |      |                                                             |      |                   |                    |                              |  |  |  |          |      |             |     |     |       |      |             |     |     |      |      |             |     |     |      |      |             |     |     |                                                                                                                                                                                                                                                                                                                                                                                                                                                                                                                                                                                                                       |                    |  |            |      |                                 |  |            |      |            |      |           |      |          |      |        |      |                |      |                    |
| <b>IPR</b>                                                                                            | Kalisvaart et al. (2006) <sup>34</sup>    | Val: 74(12)                                                                                                                                                                                                                                                                                                                                                                                                                                                                                                                                                                                                                                                                                                                                                                           | Did not report                             | Val: 0.73 (0.65-0.78)<br>Calibration:<br>$\chi^2$ $p < 0.05$<br>$\chi^2$ Trend<br>$p < 0.002$   | Externally validated IPR in surgical hip fracture population.<br>-Addition of age & type of admission improved model performance, $R^2 = 0.20$                                                                                                                                                                                                                                                                                                   | MMSE Cut-off < 24                                                                                                                                                                                                                             |                                                                                                       |                                                                  |      |                                                             |      |                   |                    |                              |  |  |  |          |      |             |     |     |       |      |             |     |     |      |      |             |     |     |      |      |             |     |     |                                                                                                                                                                                                                                                                                                                                                                                                                                                                                                                                                                                                                       |                    |  |            |      |                                 |  |            |      |            |      |           |      |          |      |        |      |                |      |                    |
|                                                                                                       | Broad val.                                |                                                                                                                                                                                                                                                                                                                                                                                                                                                                                                                                                                                                                                                                                                                                                                                       |                                            |                                                                                                 | RR of High risk group: 9.8                                                                                                                                                                                                                                                                                                                                                                                                                       |                                                                                                                                                                                                                                               |                                                                                                       |                                                                  |      |                                                             |      |                   |                    |                              |  |  |  |          |      |             |     |     |       |      |             |     |     |      |      |             |     |     |      |      |             |     |     |                                                                                                                                                                                                                                                                                                                                                                                                                                                                                                                                                                                                                       |                    |  |            |      |                                 |  |            |      |            |      |           |      |          |      |        |      |                |      |                    |
| <b>IPR</b>                                                                                            | Rudolph et al. (2011) <sup>45</sup>       | Val: 23(23)<br>Any delirium                                                                                                                                                                                                                                                                                                                                                                                                                                                                                                                                                                                                                                                                                                                                                           | Did not report                             | Val: 0.56 (0.42-0.74)<br>Incident del.<br>Calibration:<br>$\chi^2$ 1.3, $p = 0.53$              | Externally validated IPR in medical VA population, investigated feasibility of chart abstraction tool.                                                                                                                                                                                                                                                                                                                                           | MMSE Cut-off < 24                                                                                                                                                                                                                             |                                                                                                       |                                                                  |      |                                                             |      |                   |                    |                              |  |  |  |          |      |             |     |     |       |      |             |     |     |      |      |             |     |     |      |      |             |     |     |                                                                                                                                                                                                                                                                                                                                                                                                                                                                                                                                                                                                                       |                    |  |            |      |                                 |  |            |      |            |      |           |      |          |      |        |      |                |      |                    |
|                                                                                                       | Broad val.                                | 10-Prevalent<br>13-Incident                                                                                                                                                                                                                                                                                                                                                                                                                                                                                                                                                                                                                                                                                                                                                           |                                            |                                                                                                 |                                                                                                                                                                                                                                                                                                                                                                                                                                                  |                                                                                                                                                                                                                                               |                                                                                                       |                                                                  |      |                                                             |      |                   |                    |                              |  |  |  |          |      |             |     |     |       |      |             |     |     |      |      |             |     |     |      |      |             |     |     |                                                                                                                                                                                                                                                                                                                                                                                                                                                                                                                                                                                                                       |                    |  |            |      |                                 |  |            |      |            |      |           |      |          |      |        |      |                |      |                    |
| <b>IPR</b>                                                                                            | Pendlebury et al. (2016) <sup>33</sup>    | Val: 95(31)<br>Any delirium                                                                                                                                                                                                                                                                                                                                                                                                                                                                                                                                                                                                                                                                                                                                                           | Cutoff 2pts<br>All Delirium                | Val:<br>Incident delirium<br>Cohort (MMSE)<br>1<br>0.73                                         | <table border="1"> <tr> <td>Baseline cognitive impairment</td> <td>1 pt</td> </tr> <tr> <td>High BUN/Cr ratio</td> <td>1 pt</td> </tr> <tr> <td>Severe illness (SIRS ≥ 2)</td> <td>1 pt</td> </tr> <tr> <td>Vision impairment</td> <td>1 pt</td> </tr> </table>                                                                                                                                                                                  | Baseline cognitive impairment                                                                                                                                                                                                                 | 1 pt                                                                                                  | High BUN/Cr ratio                                                | 1 pt | Severe illness (SIRS ≥ 2)                                   | 1 pt | Vision impairment | 1 pt               | Original Model:<br>MMSE < 24 |  |  |  |          |      |             |     |     |       |      |             |     |     |      |      |             |     |     |      |      |             |     |     |                                                                                                                                                                                                                                                                                                                                                                                                                                                                                                                                                                                                                       |                    |  |            |      |                                 |  |            |      |            |      |           |      |          |      |        |      |                |      |                    |
| Baseline cognitive impairment                                                                         | 1 pt                                      |                                                                                                                                                                                                                                                                                                                                                                                                                                                                                                                                                                                                                                                                                                                                                                                       |                                            |                                                                                                 |                                                                                                                                                                                                                                                                                                                                                                                                                                                  |                                                                                                                                                                                                                                               |                                                                                                       |                                                                  |      |                                                             |      |                   |                    |                              |  |  |  |          |      |             |     |     |       |      |             |     |     |      |      |             |     |     |      |      |             |     |     |                                                                                                                                                                                                                                                                                                                                                                                                                                                                                                                                                                                                                       |                    |  |            |      |                                 |  |            |      |            |      |           |      |          |      |        |      |                |      |                    |
| High BUN/Cr ratio                                                                                     | 1 pt                                      |                                                                                                                                                                                                                                                                                                                                                                                                                                                                                                                                                                                                                                                                                                                                                                                       |                                            |                                                                                                 |                                                                                                                                                                                                                                                                                                                                                                                                                                                  |                                                                                                                                                                                                                                               |                                                                                                       |                                                                  |      |                                                             |      |                   |                    |                              |  |  |  |          |      |             |     |     |       |      |             |     |     |      |      |             |     |     |      |      |             |     |     |                                                                                                                                                                                                                                                                                                                                                                                                                                                                                                                                                                                                                       |                    |  |            |      |                                 |  |            |      |            |      |           |      |          |      |        |      |                |      |                    |
| Severe illness (SIRS ≥ 2)                                                                             | 1 pt                                      |                                                                                                                                                                                                                                                                                                                                                                                                                                                                                                                                                                                                                                                                                                                                                                                       |                                            |                                                                                                 |                                                                                                                                                                                                                                                                                                                                                                                                                                                  |                                                                                                                                                                                                                                               |                                                                                                       |                                                                  |      |                                                             |      |                   |                    |                              |  |  |  |          |      |             |     |     |       |      |             |     |     |      |      |             |     |     |      |      |             |     |     |                                                                                                                                                                                                                                                                                                                                                                                                                                                                                                                                                                                                                       |                    |  |            |      |                                 |  |            |      |            |      |           |      |          |      |        |      |                |      |                    |
| Vision impairment                                                                                     | 1 pt                                      |                                                                                                                                                                                                                                                                                                                                                                                                                                                                                                                                                                                                                                                                                                                                                                                       |                                            |                                                                                                 |                                                                                                                                                                                                                                                                                                                                                                                                                                                  |                                                                                                                                                                                                                                               |                                                                                                       |                                                                  |      |                                                             |      |                   |                    |                              |  |  |  |          |      |             |     |     |       |      |             |     |     |      |      |             |     |     |      |      |             |     |     |                                                                                                                                                                                                                                                                                                                                                                                                                                                                                                                                                                                                                       |                    |  |            |      |                                 |  |            |      |            |      |           |      |          |      |        |      |                |      |                    |
|                                                                                                       | Broad val.                                | 67-prevalent<br>28-incident                                                                                                                                                                                                                                                                                                                                                                                                                                                                                                                                                                                                                                                                                                                                                           | Sens .57<br>Spec .80<br>PPV .64<br>NPV .76 |                                                                                                 |                                                                                                                                                                                                                                                                                                                                                                                                                                                  | Modified Model:                                                                                                                                                                                                                               |                                                                                                       |                                                                  |      |                                                             |      |                   |                    |                              |  |  |  |          |      |             |     |     |       |      |             |     |     |      |      |             |     |     |      |      |             |     |     |                                                                                                                                                                                                                                                                                                                                                                                                                                                                                                                                                                                                                       |                    |  |            |      |                                 |  |            |      |            |      |           |      |          |      |        |      |                |      |                    |

|                                   |                                                            |                                                                                                           |                                                                                                                                                           |                                                                                                                                                                              |                                                                                                                                                                                                                                                                                                                                                                       |                                                                                                              |
|-----------------------------------|------------------------------------------------------------|-----------------------------------------------------------------------------------------------------------|-----------------------------------------------------------------------------------------------------------------------------------------------------------|------------------------------------------------------------------------------------------------------------------------------------------------------------------------------|-----------------------------------------------------------------------------------------------------------------------------------------------------------------------------------------------------------------------------------------------------------------------------------------------------------------------------------------------------------------------|--------------------------------------------------------------------------------------------------------------|
|                                   |                                                            |                                                                                                           | Incident D<br>Sens .52<br>Spec .80<br>PPV .31<br>NPV .91                                                                                                  | (0.62-0.84)<br>Cohort 2-<br>(AMTS)<br>0.70 (0.60-0.81)                                                                                                                       | 4pts=Incident delirium                                                                                                                                                                                                                                                                                                                                                | MMSE<br>< 24<br>AMTS<br>< 9                                                                                  |
| <b>Isfandiatty model</b>          | Pendlebury et al. (2016) <sup>33</sup><br>Broad val.       | Dev: 87(19)<br>Val: 95 (31)<br>Any delirium<br>67-prevalent<br>28-incident                                | Cutoff 4pts<br>Any Delirium<br>Sens .74<br>Spec .71<br>PPV .60<br>NPV .82<br>Incident Del<br>Sens .81<br>Spec .71<br>PPV .31<br>NPV .96                   | Dev: 0.82<br>(0.77-0.88)<br>Val:<br>Incident delirium<br>Cohort 1 (MMSE)<br>0.83<br>(0.74-0.91)<br>Cohort 2 (AMTS)<br>0.77<br>(0.67-0.86)                                    | Baseline cognitive 3 pt<br>impairment<br>Functional dependency 2 pt<br>Infection w/sepsis 2 pt<br>Infection w/out sepsis 1 pt<br>Weighted Score<br>Score = 7 for incident delirium<br><br>Cohort 1: MMSE<br>Cohort 2: AMTS                                                                                                                                            | <u>Original Model:</u><br>Chart review<br><br><u>Modified Model:</u><br>MMSE<br>< 24<br>AMTS<br>< 9          |
| <b>Martinez et al. 2012 model</b> | Pendlebury et al. (2016) <sup>33</sup><br>Broad val.       | 1 <sup>st</sup> Val: 76(25)<br>2 <sup>nd</sup> Val: 95(31)<br>Any delirium<br>67-prevalent<br>28-incident | Modified Model<br>Cutoff 2pts<br>Any Delirium<br>Sens .62<br>Spec .68<br>PPV .54<br>NPV .75<br>Incident Del<br>Sens .81<br>Spec .68<br>PPV .29<br>NPV .96 | 1 <sup>st</sup> Val:<br>0.85<br>(0.80-0.88)<br>Incident delirium<br>2 <sup>nd</sup> Val:<br>Cohort 1 (MMSE)<br>0.78<br>(0.68-0.88)<br>Cohort 2 (AMTS)<br>0.75<br>(0.65-0.84) | Martinez et al. 2012 Original Model<br>Age >85 1 pt<br>Dependent in ≥5 ADLs 1 pt<br>Drugs on admit:<br>-Antidepressants 1pt/drug<br>-Antidementia 2pt/<br>-anticonvulsants antipsych<br>-antipsychotics<br>Score 0-3<br>Score >1 = high risk for delirium<br>Modified Model<br>Age >85 1 pt<br>Dependency in ≥ 5 ADLs 1 pt<br>Diag of Dementia MMSE<24<br>AMTS<9 1 pt | <u>Original Model:</u><br>-No cognitive measure<br><br><u>Modified Model:</u><br>MMSE<br>< 24<br>AMTS<br>< 9 |
| <b>Pompei et al. 1994 model</b>   | Pompei et al. (1994) <sup>43</sup><br>Broad val.           | Dev: 64(15)<br>Val: 86(26)<br><br>(21=prevalent delirium)                                                 | Sens .83<br>Spec .50<br>PPV .38<br>NPV .89<br><br>*Pts stratified as low or moderate to high-risk                                                         | Dev: 0.74<br>+/- 0.05<br>Val: 0.64<br>+/- 0.05<br><br>Calibration:<br>$\chi^2$ Trend<br>$p<0.0001$                                                                           | Weighted Points<br>Baseline cognitive 2 pt<br>impairment<br>Depression 2 pt<br>Alcoholism 3 pt<br>≥ 4 comorbidities 3 pt<br><br>0-3 pts = Low risk<br>4-7 pts = Moderate risk<br>8-10 pts = High risk                                                                                                                                                                 | MMSE<br>Less than HS <21<br>High school <23<br>College edu < 24                                              |
| <b>Precipitating Risk Factors</b> | Inouye and Charpentier (1996) <sup>29</sup><br>Narrow val. | Dev: 35(18)<br>Val: 47(15)<br><br>(incident delirium)                                                     | Not reported                                                                                                                                              | No AUROC reported<br><br>Calibration:<br>$\chi^2$ Trend<br>$p<0.001$                                                                                                         | Physical restraint use 1 pt<br>Malnutrition 1 pt<br>≥3 medications added 1 pt<br>Bladder catheterization 1 pt<br>Any iatrogenic event 1 pt<br>Not weighted.<br>0 pt = Low Risk<br>1-2 pt = Intermediate<br>≥ 3 pt = High Risk<br>RR of High Risk: 17.5 (8.1-37.4)                                                                                                     | None used in model                                                                                           |

| <b>Risk Model for Delirium (RD)</b>                                                                                                                                                                                                                                                                                                                                                                                                                                                                                                               | Moerman et al. (2012) <sup>41</sup><br><br>Narrow val.   | Val: 102(27)<br><br>(incident delirium)  | Sens .81<br>Spec .56<br>PPV .41<br>NPV .89<br><br>Optimal cut-off score: 4 pts | Val: 0.73 (0.68-0.77)                                                      | <table border="1"> <thead> <tr> <th colspan="2">Weighted Points</th> </tr> </thead> <tbody> <tr><td>Delirium-previous hospitalization</td><td>5 pt</td></tr> <tr><td>Dementia</td><td>5 pt</td></tr> <tr><td>Clock Drawing</td><td></td></tr> <tr><td>-Sm mistake</td><td>1 pt</td></tr> <tr><td>-big mistake</td><td>2 pt</td></tr> <tr><td>Age</td><td></td></tr> <tr><td>-70 to 85 years old</td><td>1 pt</td></tr> <tr><td>- &gt;85 years</td><td>2 pt</td></tr> <tr><td>Impaired hearing</td><td>1 pt</td></tr> <tr><td>Impaired vision</td><td>1 pt</td></tr> <tr><td>Problems w/ADL</td><td></td></tr> <tr><td>-Help w/meal prep</td><td>.5p</td></tr> <tr><td>-help w/physical</td><td>.5p</td></tr> <tr><td>Use of heroin, methadone, morphine</td><td>2 pt</td></tr> <tr><td>Daily &gt;4 alcohol</td><td>2 pt</td></tr> </tbody> </table> <p>≥ 5 pts = High risk</p> | Weighted Points |  | Delirium-previous hospitalization | 5 pt | Dementia      | 5 pt | Clock Drawing          |   | -Sm mistake                 | 1 pt | -big mistake      | 2 pt | Age                                                  |  | -70 to 85 years old | 1 pt | - >85 years | 2 pt | Impaired hearing | 1 pt | Impaired vision | 1 pt | Problems w/ADL |  | -Help w/meal prep | .5p | -help w/physical | .5p | Use of heroin, methadone, morphine | 2 pt | Daily >4 alcohol | 2 pt | CDT<br>-11:10<br>-Two Categories<br>1 Small mistakes<br>2 Big mistakes |
|---------------------------------------------------------------------------------------------------------------------------------------------------------------------------------------------------------------------------------------------------------------------------------------------------------------------------------------------------------------------------------------------------------------------------------------------------------------------------------------------------------------------------------------------------|----------------------------------------------------------|------------------------------------------|--------------------------------------------------------------------------------|----------------------------------------------------------------------------|--------------------------------------------------------------------------------------------------------------------------------------------------------------------------------------------------------------------------------------------------------------------------------------------------------------------------------------------------------------------------------------------------------------------------------------------------------------------------------------------------------------------------------------------------------------------------------------------------------------------------------------------------------------------------------------------------------------------------------------------------------------------------------------------------------------------------------------------------------------------------------|-----------------|--|-----------------------------------|------|---------------|------|------------------------|---|-----------------------------|------|-------------------|------|------------------------------------------------------|--|---------------------|------|-------------|------|------------------|------|-----------------|------|----------------|--|-------------------|-----|------------------|-----|------------------------------------|------|------------------|------|------------------------------------------------------------------------|
| Weighted Points                                                                                                                                                                                                                                                                                                                                                                                                                                                                                                                                   |                                                          |                                          |                                                                                |                                                                            |                                                                                                                                                                                                                                                                                                                                                                                                                                                                                                                                                                                                                                                                                                                                                                                                                                                                                |                 |  |                                   |      |               |      |                        |   |                             |      |                   |      |                                                      |  |                     |      |             |      |                  |      |                 |      |                |  |                   |     |                  |     |                                    |      |                  |      |                                                                        |
| Delirium-previous hospitalization                                                                                                                                                                                                                                                                                                                                                                                                                                                                                                                 | 5 pt                                                     |                                          |                                                                                |                                                                            |                                                                                                                                                                                                                                                                                                                                                                                                                                                                                                                                                                                                                                                                                                                                                                                                                                                                                |                 |  |                                   |      |               |      |                        |   |                             |      |                   |      |                                                      |  |                     |      |             |      |                  |      |                 |      |                |  |                   |     |                  |     |                                    |      |                  |      |                                                                        |
| Dementia                                                                                                                                                                                                                                                                                                                                                                                                                                                                                                                                          | 5 pt                                                     |                                          |                                                                                |                                                                            |                                                                                                                                                                                                                                                                                                                                                                                                                                                                                                                                                                                                                                                                                                                                                                                                                                                                                |                 |  |                                   |      |               |      |                        |   |                             |      |                   |      |                                                      |  |                     |      |             |      |                  |      |                 |      |                |  |                   |     |                  |     |                                    |      |                  |      |                                                                        |
| Clock Drawing                                                                                                                                                                                                                                                                                                                                                                                                                                                                                                                                     |                                                          |                                          |                                                                                |                                                                            |                                                                                                                                                                                                                                                                                                                                                                                                                                                                                                                                                                                                                                                                                                                                                                                                                                                                                |                 |  |                                   |      |               |      |                        |   |                             |      |                   |      |                                                      |  |                     |      |             |      |                  |      |                 |      |                |  |                   |     |                  |     |                                    |      |                  |      |                                                                        |
| -Sm mistake                                                                                                                                                                                                                                                                                                                                                                                                                                                                                                                                       | 1 pt                                                     |                                          |                                                                                |                                                                            |                                                                                                                                                                                                                                                                                                                                                                                                                                                                                                                                                                                                                                                                                                                                                                                                                                                                                |                 |  |                                   |      |               |      |                        |   |                             |      |                   |      |                                                      |  |                     |      |             |      |                  |      |                 |      |                |  |                   |     |                  |     |                                    |      |                  |      |                                                                        |
| -big mistake                                                                                                                                                                                                                                                                                                                                                                                                                                                                                                                                      | 2 pt                                                     |                                          |                                                                                |                                                                            |                                                                                                                                                                                                                                                                                                                                                                                                                                                                                                                                                                                                                                                                                                                                                                                                                                                                                |                 |  |                                   |      |               |      |                        |   |                             |      |                   |      |                                                      |  |                     |      |             |      |                  |      |                 |      |                |  |                   |     |                  |     |                                    |      |                  |      |                                                                        |
| Age                                                                                                                                                                                                                                                                                                                                                                                                                                                                                                                                               |                                                          |                                          |                                                                                |                                                                            |                                                                                                                                                                                                                                                                                                                                                                                                                                                                                                                                                                                                                                                                                                                                                                                                                                                                                |                 |  |                                   |      |               |      |                        |   |                             |      |                   |      |                                                      |  |                     |      |             |      |                  |      |                 |      |                |  |                   |     |                  |     |                                    |      |                  |      |                                                                        |
| -70 to 85 years old                                                                                                                                                                                                                                                                                                                                                                                                                                                                                                                               | 1 pt                                                     |                                          |                                                                                |                                                                            |                                                                                                                                                                                                                                                                                                                                                                                                                                                                                                                                                                                                                                                                                                                                                                                                                                                                                |                 |  |                                   |      |               |      |                        |   |                             |      |                   |      |                                                      |  |                     |      |             |      |                  |      |                 |      |                |  |                   |     |                  |     |                                    |      |                  |      |                                                                        |
| - >85 years                                                                                                                                                                                                                                                                                                                                                                                                                                                                                                                                       | 2 pt                                                     |                                          |                                                                                |                                                                            |                                                                                                                                                                                                                                                                                                                                                                                                                                                                                                                                                                                                                                                                                                                                                                                                                                                                                |                 |  |                                   |      |               |      |                        |   |                             |      |                   |      |                                                      |  |                     |      |             |      |                  |      |                 |      |                |  |                   |     |                  |     |                                    |      |                  |      |                                                                        |
| Impaired hearing                                                                                                                                                                                                                                                                                                                                                                                                                                                                                                                                  | 1 pt                                                     |                                          |                                                                                |                                                                            |                                                                                                                                                                                                                                                                                                                                                                                                                                                                                                                                                                                                                                                                                                                                                                                                                                                                                |                 |  |                                   |      |               |      |                        |   |                             |      |                   |      |                                                      |  |                     |      |             |      |                  |      |                 |      |                |  |                   |     |                  |     |                                    |      |                  |      |                                                                        |
| Impaired vision                                                                                                                                                                                                                                                                                                                                                                                                                                                                                                                                   | 1 pt                                                     |                                          |                                                                                |                                                                            |                                                                                                                                                                                                                                                                                                                                                                                                                                                                                                                                                                                                                                                                                                                                                                                                                                                                                |                 |  |                                   |      |               |      |                        |   |                             |      |                   |      |                                                      |  |                     |      |             |      |                  |      |                 |      |                |  |                   |     |                  |     |                                    |      |                  |      |                                                                        |
| Problems w/ADL                                                                                                                                                                                                                                                                                                                                                                                                                                                                                                                                    |                                                          |                                          |                                                                                |                                                                            |                                                                                                                                                                                                                                                                                                                                                                                                                                                                                                                                                                                                                                                                                                                                                                                                                                                                                |                 |  |                                   |      |               |      |                        |   |                             |      |                   |      |                                                      |  |                     |      |             |      |                  |      |                 |      |                |  |                   |     |                  |     |                                    |      |                  |      |                                                                        |
| -Help w/meal prep                                                                                                                                                                                                                                                                                                                                                                                                                                                                                                                                 | .5p                                                      |                                          |                                                                                |                                                                            |                                                                                                                                                                                                                                                                                                                                                                                                                                                                                                                                                                                                                                                                                                                                                                                                                                                                                |                 |  |                                   |      |               |      |                        |   |                             |      |                   |      |                                                      |  |                     |      |             |      |                  |      |                 |      |                |  |                   |     |                  |     |                                    |      |                  |      |                                                                        |
| -help w/physical                                                                                                                                                                                                                                                                                                                                                                                                                                                                                                                                  | .5p                                                      |                                          |                                                                                |                                                                            |                                                                                                                                                                                                                                                                                                                                                                                                                                                                                                                                                                                                                                                                                                                                                                                                                                                                                |                 |  |                                   |      |               |      |                        |   |                             |      |                   |      |                                                      |  |                     |      |             |      |                  |      |                 |      |                |  |                   |     |                  |     |                                    |      |                  |      |                                                                        |
| Use of heroin, methadone, morphine                                                                                                                                                                                                                                                                                                                                                                                                                                                                                                                | 2 pt                                                     |                                          |                                                                                |                                                                            |                                                                                                                                                                                                                                                                                                                                                                                                                                                                                                                                                                                                                                                                                                                                                                                                                                                                                |                 |  |                                   |      |               |      |                        |   |                             |      |                   |      |                                                      |  |                     |      |             |      |                  |      |                 |      |                |  |                   |     |                  |     |                                    |      |                  |      |                                                                        |
| Daily >4 alcohol                                                                                                                                                                                                                                                                                                                                                                                                                                                                                                                                  | 2 pt                                                     |                                          |                                                                                |                                                                            |                                                                                                                                                                                                                                                                                                                                                                                                                                                                                                                                                                                                                                                                                                                                                                                                                                                                                |                 |  |                                   |      |               |      |                        |   |                             |      |                   |      |                                                      |  |                     |      |             |      |                  |      |                 |      |                |  |                   |     |                  |     |                                    |      |                  |      |                                                                        |
| <b>Susceptibility Score</b>                                                                                                                                                                                                                                                                                                                                                                                                                                                                                                                       | Pendlebury et al. (2016) <sup>49</sup><br><br>Broad val. | Val: 308(28)<br><br>(incidence delirium) | Sens 0.71<br>Spec 0.88<br>PPV 0.5<br>NPV 0.95<br><br>Cut-off Score: 5 pts      | Val: 0.81 (0-70-0.92)<br><br>Improved w/age eliminated to 0.84 (0.77-0.92) | <table border="1"> <thead> <tr> <th colspan="2">Weighted Points</th> </tr> </thead> <tbody> <tr><td>Dementia/cog impair</td><td>2</td></tr> <tr><td>Age &gt;80 years</td><td>2</td></tr> <tr><td>Severe illness (SIRS+)</td><td>1</td></tr> <tr><td>Infection-working diagnosis</td><td>1</td></tr> <tr><td>Vision impairment</td><td>1</td></tr> </tbody> </table> <p>&gt;5 pts=High Risk</p> <p>ORs for &gt;5 risk score: 25.0 (3.0-208.9)<br/>RR for &gt;5 risk score: 5.4</p>                                                                                                                                                                                                                                                                                                                                                                                              | Weighted Points |  | Dementia/cog impair               | 2    | Age >80 years | 2    | Severe illness (SIRS+) | 1 | Infection-working diagnosis | 1    | Vision impairment | 1    | Known diagnosis of dementia or MMSE < 24<br>AMTS < 9 |  |                     |      |             |      |                  |      |                 |      |                |  |                   |     |                  |     |                                    |      |                  |      |                                                                        |
| Weighted Points                                                                                                                                                                                                                                                                                                                                                                                                                                                                                                                                   |                                                          |                                          |                                                                                |                                                                            |                                                                                                                                                                                                                                                                                                                                                                                                                                                                                                                                                                                                                                                                                                                                                                                                                                                                                |                 |  |                                   |      |               |      |                        |   |                             |      |                   |      |                                                      |  |                     |      |             |      |                  |      |                 |      |                |  |                   |     |                  |     |                                    |      |                  |      |                                                                        |
| Dementia/cog impair                                                                                                                                                                                                                                                                                                                                                                                                                                                                                                                               | 2                                                        |                                          |                                                                                |                                                                            |                                                                                                                                                                                                                                                                                                                                                                                                                                                                                                                                                                                                                                                                                                                                                                                                                                                                                |                 |  |                                   |      |               |      |                        |   |                             |      |                   |      |                                                      |  |                     |      |             |      |                  |      |                 |      |                |  |                   |     |                  |     |                                    |      |                  |      |                                                                        |
| Age >80 years                                                                                                                                                                                                                                                                                                                                                                                                                                                                                                                                     | 2                                                        |                                          |                                                                                |                                                                            |                                                                                                                                                                                                                                                                                                                                                                                                                                                                                                                                                                                                                                                                                                                                                                                                                                                                                |                 |  |                                   |      |               |      |                        |   |                             |      |                   |      |                                                      |  |                     |      |             |      |                  |      |                 |      |                |  |                   |     |                  |     |                                    |      |                  |      |                                                                        |
| Severe illness (SIRS+)                                                                                                                                                                                                                                                                                                                                                                                                                                                                                                                            | 1                                                        |                                          |                                                                                |                                                                            |                                                                                                                                                                                                                                                                                                                                                                                                                                                                                                                                                                                                                                                                                                                                                                                                                                                                                |                 |  |                                   |      |               |      |                        |   |                             |      |                   |      |                                                      |  |                     |      |             |      |                  |      |                 |      |                |  |                   |     |                  |     |                                    |      |                  |      |                                                                        |
| Infection-working diagnosis                                                                                                                                                                                                                                                                                                                                                                                                                                                                                                                       | 1                                                        |                                          |                                                                                |                                                                            |                                                                                                                                                                                                                                                                                                                                                                                                                                                                                                                                                                                                                                                                                                                                                                                                                                                                                |                 |  |                                   |      |               |      |                        |   |                             |      |                   |      |                                                      |  |                     |      |             |      |                  |      |                 |      |                |  |                   |     |                  |     |                                    |      |                  |      |                                                                        |
| Vision impairment                                                                                                                                                                                                                                                                                                                                                                                                                                                                                                                                 | 1                                                        |                                          |                                                                                |                                                                            |                                                                                                                                                                                                                                                                                                                                                                                                                                                                                                                                                                                                                                                                                                                                                                                                                                                                                |                 |  |                                   |      |               |      |                        |   |                             |      |                   |      |                                                      |  |                     |      |             |      |                  |      |                 |      |                |  |                   |     |                  |     |                                    |      |                  |      |                                                                        |
| <p>Key:<br/>Dev=Development, Val=Validation<br/>Sens=Sensitivity, Spec=Specificity, PPV=Positive Predictive Value, NPV=Negative Predictive Value<br/>Area Under the Receiver Operating Curve Statistic, Dev=Development, Val=Validation, mRASS=Modified Richmond Agitation-Sedation Scale, TMTYB=The Months of the Year Backwards<br/>ADL=Activities of Daily Living<br/>MMSE=Mini Mental Status Exam, AMTS=Abbreviated Mental Test Score, CDT=Clock Drawing Test, mBDR=Modified Blessed Dementia Rating, MoCA=Montreal Cognitive Assessment.</p> |                                                          |                                          |                                                                                |                                                                            |                                                                                                                                                                                                                                                                                                                                                                                                                                                                                                                                                                                                                                                                                                                                                                                                                                                                                |                 |  |                                   |      |               |      |                        |   |                             |      |                   |      |                                                      |  |                     |      |             |      |                  |      |                 |      |                |  |                   |     |                  |     |                                    |      |                  |      |                                                                        |

### Predictive ability

Reported AUROC in externally validated delirium prediction models ranged from 0.52-0.94 (Figure 4). Of these models, the highest performing model (AUROC 0.94, CI 0.91-0.97) was developed and validated in a surgical population.<sup>35</sup> Two models reported an external validation AUROC above 0.80, indicating moderate predictive ability.<sup>33 49</sup> Both were developed and validated in medical populations and share similarities with variable use including pre-existing cognitive impairment and presence of infection.

### Model calibration



1  
2  
3 Six of the fourteen externally validated delirium prediction models reported calibration  
4 metrics.<sup>29-31 34 43 45</sup> The reported chi-square statistics were significant in five prognostic models<sup>29-</sup>  
5  
6  
7  
8 <sup>31 34 43</sup> and did not reach significance in one model.<sup>45</sup> Four of the 23 studies that developed  
9  
10 models reported calibration statistics.<sup>32 37 40 42</sup> None of the included studies reported calibration  
11  
12 plots or slopes.

### 14 **Risk of overfitting**

15  
16 Events per variable (EPV) were examined in each of the fourteen externally validated models.  
17  
18 Models estimating more parameters than events in a 1:10 ratio are at risk of statistical overfitting,  
19  
20 potentially leading to overly optimistic model performance.<sup>22 54-57</sup> In 14 models with external  
21  
22 validation, four had fewer than optimum events for the number of parameters estimated in the  
23  
24 development stage of the models.<sup>25 29 30 48</sup> Five had fewer than optimum events in the external  
25  
26 validation stage.<sup>23 29-31 45</sup> Two models did not reach optimum events for the number of  
27  
28 parameters in either the development or the external validation studies.<sup>29 30</sup> Various statistical  
29  
30 techniques such as shrinkage procedures, the use of lasso or penalized regression and internal  
31  
32 validation methods are suggested to counter the effects of lower EPV.<sup>15 54 58</sup> None of the  
33  
34 identified studies report use of statistical shrinkage procedures. Five studies applied internal  
35  
36 validation techniques in the development stage of their model to account for stability within their  
37  
38 model.<sup>24 25 37 38 46</sup>

### 44 **Clinical Utility**

45  
46 Clinical utility of a prediction model may be evaluated through several different statistical  
47  
48 metrics including odds ratios, relative risk, sensitivity and specificity, receiver operator curves, R  
49  
50 squared and integrated discrimination improvement indices as well as the clinical utility curve  
51  
52 statistic and the decision curve analysis.<sup>57 59</sup> Six externally validated delirium prediction model  
53  
54  
55  
56  
57  
58  
59

1  
2  
3 studies reported odds ratios or relative risk statistics evaluating the highest risk stratification cut-  
4 off point.<sup>29-31 34 46 49</sup> Seven studies reported sensitivity and specificity<sup>23 27 33 35 41 43 49</sup> and one  
5  
6 study reported the rate of true positives and false positives.<sup>44</sup> None of the identified studies  
7  
8 reported decision curve analysis or clinical utility curve analysis. While the majority of studies  
9  
10 selected variables that were either routinely used in practice or were feasible to administer, two  
11  
12 studies developed delirium prediction models based on data routinely entered into the electronic  
13  
14 health record to increase feasibility of use.<sup>24 44</sup> Pendlebury et al. (2016) adapted variable  
15  
16 definition and use to match routine clinical assessment while externally validating four delirium  
17  
18 prediction models and creating an additional risk stratification tool.<sup>33 49</sup> Moerman et al. reported  
19  
20 feasibility and reliability statistics following the incorporation of the risk prediction tool into  
21  
22 practice.<sup>41</sup>

## 23 24 25 26 27 28 **DISCUSSION**

29  
30 This review identified moderate predictive ability (AUROC 0.52-0.94) in fourteen externally  
31  
32 validated delirium prediction models with eight out of fourteen models using narrow validation.  
33  
34 However, three main limitations were identified. First, study design, application, and reporting of  
35  
36 statistical methods appear inadequate. Data collection overlapped with the initial diagnosis of  
37  
38 delirium in the highest performing model as well as in two other included studies, likely  
39  
40 exaggerating model performance.<sup>15 27 32 35</sup> Low EPV combined with limited application of  
41  
42 internal validation techniques contributed to an increased risk of bias and likely the creation of  
43  
44 overly optimistic models.<sup>15 50-52</sup> Second, broad variable definitions, particularly in functional and  
45  
46 cognitive abilities, may have led to overlapping data capture. For example, Pendlebury et al.  
47  
48 (2016) demonstrated this possible effect in the development of the *Susceptibility Score*, model  
49  
50 performance did not improve with the addition of functional impairment to a model that already  
51  
52  
53  
54  
55  
56  
57  
58  
59  
60

1  
2  
3 included cognitive impairment and age.<sup>49</sup> Lastly, assessment of the outcome variable, delirium,  
4 was largely non-systematic, once daily, and avoided weekends. In the studies that assessed  
5 delirium more than once per day, the assessment was performed by routine clinical staff,  
6 decreasing consistency. This is a major limitation for an acute condition that fluctuates, may  
7 occur suddenly and is dependent on precise, objective assessment. While case-mix between  
8 populations may impact observed delirium rates, we believe it would be advantageous for future  
9 studies to incorporate systematic, frequent and consistent delirium assessments.

10  
11  
12 As delirium is a multifactorial syndrome representing an interrelationship between premorbid  
13 and precipitating factors,<sup>29</sup> the time course of data collection is important. Nine of the fourteen  
14 externally validated delirium prediction models incorporate precipitating factors into their  
15 predictive model; two models<sup>29 31</sup> are intentionally constructed in this manner. The inclusion of  
16 a precipitating factor into a premorbid delirium prediction model may provide important  
17 predictive power if designed in the appropriate manner, as demonstrated by Inouye et al (1993).<sup>30</sup>  
18  
19 However, if variables are collected after the onset of delirium this would exaggerate model  
20 performance (e.g. ICU admission). As an example, one delirium prediction model has a robust  
21 AUROC of 0.94 (CI 0.91-0.97).<sup>35</sup> This study excluded those with a MMSE <23 and prevalent  
22 delirium. Data collection occurred within the first 24-hours following surgery, however, delirium  
23 assessment began immediately after surgery, with a 50% delirium prevalence on the day of  
24 surgery. This overlap of data collection and delirium assessment likely exaggerated model  
25 performance for this outlier study. Seven externally validated models included data about the  
26 precipitating factor present upon admission and either excluded those with prevalent delirium or  
27 calculated separate AUROCs for prevalent delirium versus incident delirium.<sup>23 30 33 44 49</sup>

28  
29  
30  
31  
32  
33  
34  
35  
36  
37  
38  
39  
40  
41  
42  
43  
44  
45  
46  
47  
48  
49  
50  
51  
52  
53  
54 Model underperformance may be explained by low powered studies, insufficient events per  
55  
56  
57  
58  
59  
60

1  
2  
3 variable (EPV) as well as the use of univariate analyses and stepwise regression to select  
4  
5 predictive variables for inclusion into models. Although these are common methods to use for  
6  
7 model development and may counter the effects of insufficient EPV, each approach has  
8  
9 significant drawbacks.<sup>60</sup> Univariate analysis may reduce predictive ability by inclusion of  
10  
11 variables that are not independent of each other, and stepwise regression disadvantages include  
12  
13 conflation of *p*-values and a biased estimation of coefficients.<sup>15 22 50 61</sup> While EPV was originally  
14  
15 adapted to ensure stability in regression covariates, it has been identified as an important  
16  
17 component to predictive model stability and reproducibility due to the result of overfitting.<sup>15 50 62</sup>  
18  
19 Ogundimu et al. (2016) demonstrate this effect by simulating models with EPV of 2, 5, 10, 15,  
20  
21 20, 25 and 50. Stability of models increased as the EPV increased and models including  
22  
23 predictors with low population prevalence required >20 EPV.<sup>63</sup> The degree of model overfitting  
24  
25 should be assessed through calibration statistics and forms of internal validation such as  
26  
27 bootstrapping. Future studies should consider the use of statistical methods to counter low EPV  
28  
29 including the application of statistical shrinkage techniques and penalised regression using ridge  
30  
31 or lasso regression.<sup>15 22 56 60 64</sup> Further, future studies may benefit from the incorporation of  
32  
33 advanced statistical techniques such as Bayesian Networks and machine learning that have  
34  
35 shown to improve the performance of previous prediction models that were built using standard  
36  
37 logistic regression.<sup>65 66</sup> These methods facilitate the exploration of complex interactions between  
38  
39 risk factors as well as adapt to changing patient conditions, allowing for a dynamic model.  
40  
41  
42 Increasing age, pre-existing cognitive impairment, functional and sensory impairments were the  
43  
44 most frequently used variables in the externally validated delirium prediction models. However,  
45  
46 many studies employed different definition for these variables, making comparisons difficult  
47  
48 between models and limiting generalisability across populations. Functional and physical  
49  
50  
51  
52  
53  
54  
55  
56  
57  
58  
59  
60

1  
2  
3 impairments were broadly defined resulting in the inability to discern whether impairments  
4 resulted from truly physical origins or if the noted decrease in function was related to cognitive  
5 impairment leading to an overlap in data collection. Age may not be a relevant risk factor when  
6 considering an older cohort of patients; for example, a recent study found that global cognition  
7 may mediate the relationship between age and postoperative delirium<sup>67</sup> therefore the inclusion of  
8 age in a delirium prediction model may not add to the overall performance of the model if  
9 cognition is adequately captured or if only elderly patients are included in the study. This effect  
10 was demonstrated by Pendlebury et al. (2016), an improved AUROC resulted when age was  
11 removed from the prediction model (0.81 to 0.84).<sup>49</sup> As the inclusion of age, functional, physical,  
12 and cognitive impairments may result in an overlap of data collection, future models may want to  
13 explore variables that have not been frequently used in delirium prediction yet are highly  
14 predictive of mortality, surgical complications, and depression. An example would be the self-  
15 rated health question. This is a single-item question evaluating an individual's perception of their  
16 own health and has been found to be a significant predictor of subjective memory complaints,  
17 depression and mortality.<sup>68-74</sup> Further, this variable is feasible as it takes minimal time and no  
18 training. Incorporation of variables such as self-rated health may increase both predictive ability  
19 and feasibility thus improving clinical utility.

20  
21  
22  
23  
24  
25  
26  
27  
28  
29  
30  
31  
32  
33  
34  
35  
36  
37  
38  
39  
40  
41  
42 The highest performing delirium prediction model excluded those with pre-existing cognitive  
43 impairment, did not incorporate a cognitive variable and used hearing impairment as a predictive  
44 variable (note the methodological concerns of this study were discussed above).<sup>35</sup> Cognitive  
45 impairment was the most frequently used variable and is a known risk factor for delirium  
46 development.<sup>2 67</sup> Prior research demonstrates individuals with Mild Cognitive Impairment (MCI)  
47 are at a significantly higher risk of delirium development.<sup>75 76</sup> All models used cut-off scores on  
48  
49  
50  
51  
52  
53  
54  
55  
56  
57  
58  
59  
60

1  
2  
3 cognitive tests that would indicate dementia, providing no evaluation of subtler cognitive decline  
4 such as MCI. Furthermore, Jones et al. (2016) demonstrated a strong linear relationship between  
5 risk of delirium and all levels of cognitive function, even those considered unimpaired through  
6 formal testing.<sup>67</sup> In this study, a General Cognitive Performance score was developed using a  
7 complex battery of neuropsychological tests. Unfortunately, the neuropsychological battery is  
8 too complex to be practical for the clinical setting. Fong et al. (2015) found associations between  
9 baseline executive functioning, complex attention and semantic networks to be associated with  
10 subsequent delirium development<sup>77</sup>. The inclusion of MCI, or simple cognitive tests as employed  
11 by Fong et al. (2015), as a variable may increase the detection and prevalence of cognitive  
12 impairment as a variable thus increasing its predictive power. Further exploration into isolated  
13 cognitive tests that are feasible to administer in a clinical setting as well as sensitive to the  
14 spectrum of cognitive impairment may enhance delirium prediction.

15  
16  
17  
18  
19  
20  
21  
22  
23  
24  
25  
26  
27  
28  
29  
30  
31 The clinical utility of a prediction model is dependent on both its efficacy at predicting those at  
32 risk and feasibility hence both must be considered when building and validating a model.  
33 Clinical utility is compromised by efficacious models that are not feasible. Conversely, a feasible  
34 model that is not effective at identifying those at risk also lacks clinical utility. To this end,  
35 model derivation must focus on building an effective model. The next aspect that must be  
36 considered is the ability to enhance clinical care. Predicting individuals at high risk is clearly  
37 important, but to an experienced clinician, delirium may already be anticipated. Maximum value  
38 may be obtained by aiding in prediction of moderate risk patients, where the risk of delirium may  
39 be more ambiguous.

### 40 41 42 43 44 45 46 47 48 49 50 51 **Strengths and weaknesses of this study**

52  
53  
54 This systematic review benefitted from a prospectively developed protocol. A comprehensive

1  
2  
3 literature search from multiple databases using broad search terms yielded twenty-seven studies  
4  
5 with fourteen externally validated delirium prediction models. Our author team is  
6  
7 interprofessional, providing the opportunity for different perspectives on model evaluation.  
8  
9  
10 Further, this review synthesizes evidence from both medical and surgical populations while  
11  
12 providing statistical-based recommendations for study and model design for future delirium  
13  
14 prediction model studies.  
15

16  
17 The limitations of this systematic review may be that articles focused on a younger population  
18  
19 were not included. This limitation could narrow the generalisability of the results of this  
20  
21 systematic review to the broader population however delirium predominantly affects older  
22  
23 adults. Further, this review is limited by population focus. We did not include prediction models  
24  
25 built in palliative care, long-term care facilities, or the emergency department.  
26  
27

### 28 **Strengths and weaknesses in relation to other studies**

29  
30  
31 Past systematic reviews concluded that the identified delirium prediction models were largely  
32  
33 heterogeneous in variable inclusion and were not sufficiently developed for incorporation into  
34  
35 practice.<sup>78-80</sup> Recommendations include further testing on existing delirium prediction models  
36  
37 followed by integration in practice as well as further exploration into measurements that are  
38  
39 feasible clinically. This review included eight models not previously identified in past systematic  
40  
41 reviews of delirium prediction models. Further this review is the first to identify study and  
42  
43 model design issues and discusses the paucity of measurements sensitive to the spectrum of  
44  
45 cognitive impairment.  
46  
47

### 48 **Implications and future research**

49  
50  
51 Two avenues may be pursued for future studies. The first avenue involves model aggregation;  
52  
53 currently available delirium prediction models would be combined into a meta-model through  
54  
55  
56  
57  
58  
59  
60

1  
2  
3 stacked regression in a new cohort of participants. This method would update currently published  
4 models to a new population, furthering generalizability and bolstering broad external  
5 validation.<sup>81</sup> Variable definition could be harmonized in the meta-model with the intention to use  
6 variables that are readily available and feasible for routine practice. This method would further  
7 delirium prediction for those with dementia-level pre-existing cognitive impairment as well as  
8 examine the individual contributions of functional impairment due to physical conditions,  
9 cognitive impairment or age through model re-fitting. Nonetheless, a future meta-model would  
10 continue presently identified limitations such as exclusion of the spectrum of cognition. The  
11 second avenue should focus on the development and broad validation of delirium prediction  
12 models exploring the use of simple cognitive tests that would be inclusive to mild cognitive  
13 impairment and sensitive to the spectrum of cognition. Further, future models should consider  
14 development of dynamic predictive models using advanced statistical methods such as Bayesian  
15 Networks, artificial intelligence, and machine learning as these methods have shown to improve  
16 models built using standard logistic regression.<sup>66 82</sup>

17  
18  
19 We suggest the following broad principles for use in future studies: (1) Delirium prediction  
20 models should be developed only using data available prior to the onset of delirium and likely  
21 should be focused in specific populations depending on whether the precipitating event has  
22 occurred or not; (2) should include structured, twice daily assessment (regardless of weekends)  
23 using validated tools and trained research staff to identify delirium; (3) should consider inclusion  
24 of variables and assessments that are readily available in clinical practice and are feasible to  
25 administer without extensive training or interpretation where possible and not to exclude a more  
26 informative variable; (4) model development and validation should follow rigorous methods  
27 outlined by Steyerberg (2009)<sup>22</sup> and Steyerberg and Vergouwe (2014)<sup>56</sup> including strategies to



1  
2  
3 counter low sample size and overly optimistic model performance, the use of Akaike Information  
4 Criterion (AIC) and Bayesian Information Criterion (BIC) to assess model fit, and consider  
5 broad validations to expand case-mix and generalizability; and (5) adhere to strict guidelines as  
6 outlined by The TRIPOD Statement for statistical performance reporting including calibration  
7 and clinical utility statistics.<sup>22 50-52 56 59</sup>

8  
9  
10 Two classes of delirium prediction models may be required, based on the acuity of the admission  
11 (elective or emergency). If precipitating factors are included in an elective admission delirium  
12 prediction model, where the patient is yet to incur the delirium provoking event, an individual's  
13 delirium risk may be overestimated. In the second option, inclusion of only premorbid factors  
14 may underestimate delirium risk given the emergency clinical scenario.

## 25 26 **Conclusion**

27  
28 Twenty-three delirium prediction models were identified. Fourteen of these were externally  
29 validated and three were internally validated. Of the fourteen validated delirium prediction  
30 models, the overall predictive ability is moderate with an AUROC range from 0.52-0.94.  
31 Assessment of the outcome variable, delirium, is often non-systematic and future studies would  
32 be improved with more standardized and frequent assessment. Overall, the variable inclusion and  
33 applied definitions in delirium prediction models are heterogeneous making comparisons  
34 difficult. To improve delirium prediction models, future models should consider using standard  
35 variables and definitions to work towards a prediction tool that is generalizable to several  
36 populations within the remit of understanding the relationship with the precipitating event.

## 37 38 39 **Contributors**

40  
41 HL and SP with the mentorship of RDS formulated the aim, developed the study protocol,  
42 completed the search and extracted the data. HL and RDS synthesized the data. HL with the  
43  
44  
45  
46  
47  
48

1  
2  
3 mentorship of RDS drafted the manuscript and designed the tables. RB designed the figures and  
4  
5 assisted with statistical interpretation. LB provided expertise on content related to cognition and  
6  
7 reviewed the manuscript. DD and CMC assisted with synthesis and interpretation of results and  
8  
9 discussion in relation to their expertise in geriatrics, cognition, and delirium. MC, MM, MTVC,  
10  
11 and PP assisted with synthesis of results and discussion section, providing expertise in delirium  
12  
13 in its respective settings.  
14  
15

### 16 17 **Declaration of Interests**

18  
19 All authors have completed ICMJE disclosure forms and no conflicts of interest are declared.  
20

### 21 22 **Data Sharing Statement**

23  
24 Complete search results including excluded studies and CHARMS Risk of Bias checklist  
25  
26 decision tree available from corresponding author upon request.  
27

### 28 29 **Acknowledgements**

30  
31 HL and RDS acknowledge funding support from the Department of Anesthesiology at University  
32  
33 of Wisconsin-Madison. PP acknowledges funding support from R01 NHLBI (HL111111) and  
34  
35 research grant from Hospira Inc. in collaboration with NIH. We would like to express our  
36  
37 sincere gratitude for the assistance of Mary Hitchcock in Ebling Health Sciences Library in the  
38  
39 design of the search strategy and Dave Dwyer and Lily Turner for their assistance with  
40  
41 proofreading the manuscript.  
42  
43

### 44 45 **Figure Legends**

46  
47 Figure 1: No legend  
48

49 Figure 2: Figure 2 displays the CHARMS Risk of Bias assessment on all included studies.

50 Study Participants: design of included study, sampling method, inclusion/exclusion  
51 criteria

52 Predictors: definition, timing and measurement

53 Outcome: definition, timing and measurement

54 Sample Size and Missing Data: number of participants in study, events per variable,  
55  
56  
57

1  
2  
3 missing data

4 Statistical Analysis: Selection of predictors, internal validation, type of external  
5 validation  
6

7  
8 Figure 3: Figure 3 displays the mean frequency of variable use in the fourteen externally  
9 validated

10 delirium prediction models

11 (P) indicated a precipitating risk factor used in a delirium prediction model

12 The following variables were used twice and are not represented in the figure: BUN/Cr  
13 ratio, comorbidities, history of delirium, depression, medications (1-upon admission, 1-  
14 added during hospital stay), restraint use, and malnutrition (1-altered albumin level, 1-  
15 malnutrition scale).

16  
17 The following variables were used once and are not represented in the figure: bladder  
18 catheter use, C-Reactive Protein, emergency surgery, presence of fracture on admission,  
19 history of cerebrovascular accident, iatrogenic event, intensive care unit admission, and  
20 open surgery.  
21

22  
23 Figure 4: Figure 4 shows the published AUROC statistic for the 14 externally validated Delirium  
24 Prediction Models

25 **#D/N**: Number of confirmed delirium in study/overall sample size

26 **DPM**: Delirium prediction model name. The corresponding number of references the  
27 different AUROCs calculated based on different cognitive tests applied to the model by  
28 the authors.

29 **Squares w/error bars**: Size of square corresponds to sample size of study

30 **AUROC**: Reported Area Under the Receiver Curve Statistic, 95% Confidence Intervals  
31  
32  
33  
34  
35  
36  
37  
38  
39  
40  
41  
42  
43  
44  
45  
46  
47  
48  
49  
50  
51  
52  
53  
54  
55  
56  
57  
58  
59  
60

## References

1. Sanders RD, Pandharipande PP, Davidson AJ, et al. Anticipating and managing postoperative delirium and cognitive decline in adults. *BMJ: British Medical Journal (Overseas & Retired Doctors Edition)* 2011;343(7816):197-200 4p. doi: 10.1136/bmj.d4331
2. Inouye SK, Westendorp RG, Saczynski JS. Delirium in elderly people. *Lancet* 2014;383(9920):911-22. doi: 10.1016/s0140-6736(13)60688-110.1016/S0140-6736(13)60688-1. Epub 2013 Aug 28.
3. Ryan DJ, O'Regan NA, Caoimh RÓ, et al. Delirium in an adult acute hospital population: predictors, prevalence and detection. *BMJ Open* 2013;3(1) doi: 10.1136/bmjopen-2012-001772
4. Pandharipande PP, Girard TD, Jackson JC, et al. Long-Term Cognitive Impairment after Critical Illness. *The New England Journal Of Medicine* 2013;369(14):1306-16. doi: 10.1056/NEJMoa1301372
5. Leslie DL, Inouye SK. The importance of delirium: economic and societal costs. *Journal of the American Geriatrics Society* 2011;59 Suppl 2:S241-3. doi: 10.1111/j.1532-5415.2011.03671.x [published Online First: 2011/12/07]
6. Han JH, Brummel NE, Chandrasekhar R, et al. Exploring Delirium's Heterogeneity: Association Between Arousal Subtypes at Initial Presentation and 6-Month Mortality in Older Emergency Department Patients. *The American journal of geriatric psychiatry : official journal of the American Association for Geriatric Psychiatry* 2016 doi: 10.1016/j.jagp.2016.05.016 [published Online First: 2016/09/14]
7. Pollard C, Fitzgerald M, Ford K. Delirium: The lived experience of older people who are delirious post-orthopaedic surgery. *International Journal of Mental Health Nursing* 2015;24(3):213-21. doi: 10.1111/inm.12132
8. Gleason LJ, Schmitt EM, Kosar CM, et al. Effect of Delirium and Other Major Complications on Outcomes After Elective Surgery in Older Adults. *JAMA Surgery* 2015;150(12):1134-40. doi: 10.1001/jamasurg.2015.2606
9. Robinson TN, Raeburn CD, Tran ZV, et al. Postoperative delirium in the elderly: risk factors and outcomes. *Annals of surgery* 2009;249(1):173-8. doi: 10.1097/SLA.0b013e31818e4776 [published Online First: 2008/12/25]
10. Adams ST, Leveson SH. Clinical prediction rules. *BMJ (Clinical research ed)* 2012;344
11. Reilly BM, Evans AT. Translating clinical research into clinical practice: impact of using prediction rules to make decisions. *Annals of internal medicine* 2006;144(3):201-09.
12. Moons KGM, Kengne AP, Woodward M, et al. Risk prediction models: I. Development, internal validation, and assessing the incremental value of a new (bio)marker. *Heart* 2012;98(9):683-90. doi: 10.1136/heartjnl-2011-301246

13. Debray TPA, Moons KGM, Ahmed I, et al. A framework for developing, implementing, and evaluating clinical prediction models in an individual participant data meta-analysis. *Statistics in medicine* 2013;32(18):3158-80. doi: 10.1002/sim.5732
14. Hayhurst CJ, Pandharipande PP, Hughes CG. Intensive Care Unit Delirium: A Review of Diagnosis, Prevention, and Treatment. *Anesthesiology* 2016;125(6):1229-41. doi: 10.1097/ALN.0000000000001378
15. Moons KG, de Groot JA, Bouwmeester W, et al. Critical appraisal and data extraction for systematic reviews of prediction modelling studies: the CHARMS checklist. *PLoS medicine* 2014;11(10):e1001744. doi: 10.1371/journal.pmed.1001744 [published Online First: 2014/10/15]
16. Moher D, Liberati A, Tetzlaff J, et al. Preferred reporting items for systematic reviews and meta-analyses: the PRISMA statement. *Int J Surg* 2010;8(5):336-41. doi: 10.1016/j.ijssu.2010.02.007 [published Online First: 2010/02/23]
17. Nations U. Ageing 2016 [Available from: <http://www.un.org/en/sections/issues-depth/ageing/index.html> accessed March 7th 2017.
18. Centers for Disease C. Elder Abuse: Definitions 2016 [Available from: <https://www.cdc.gov/violenceprevention/elderabuse/definitions.html> accessed March 7th 2017.
19. Barr J, Fraser GL, Puntillo K, et al. Clinical practice guidelines for the management of pain, agitation, and delirium in adult patients in the intensive care unit. *Crit Care Med* 2013;41(1):263-306. doi: 10.1097/CCM.0b013e3182783b72 [published Online First: 2012/12/28]
20. Hui D, Frisbee-Hume S, Wilson A, et al. Effect of Lorazepam With Haloperidol vs Haloperidol Alone on Agitated Delirium in Patients With Advanced Cancer Receiving Palliative Care: A Randomized Clinical Trial. *Jama* 2017;318(11):1047-56. doi: 10.1001/jama.2017.11468 [published Online First: 2017/10/05]
21. Well GA, Shea, B., O'Connell, J.P., Welch, V., Losos, M., Tugwell, P. The Newcastle-Ottawa Scale (NOS) for assessing the quality of nonrandomised studies in meta-analyses Ottawa: Ottawa Hospital; 2014 [Available from: [http://www.ohri.ca/programs/clinical\\_epidemiology/oxford.asp](http://www.ohri.ca/programs/clinical_epidemiology/oxford.asp) accessed 05-31 2016.
22. Steyerberg EW. Clinical prediction models : a practical approach to development, validation, and updating: New York : Springer, [2009] ©2009 2009.
23. Carrasco MP, Villarreal L, Andrade M, et al. Development and validation of a delirium predictive score in older people. *Age and ageing* 2014;43(3):346-51. doi: 10.1093/ageing/aft141 [published Online First: 2013/09/26]
24. de Wit HAJM, Winkens B, Mestres Gonzalvo C, et al. The development of an automated ward independent delirium risk prediction model. *Int J Clin Pharm* 2016 doi: 10.1007/s11096-016-0312-7
25. Douglas VC, Hessler CS, Dhaliwal G, et al. The AWOL tool: derivation and validation of a delirium prediction rule. *J Hosp Med* 2013;8(9):493-9. doi: 10.1002/jhm.2062 [published Online First: 2013/08/08]
26. Fisher BW, Flowerdew G. A simple model for predicting postoperative delirium in older patients undergoing elective orthopedic surgery. *Journal of the American Geriatrics Society* 1995;43(2):175-8. [published Online First: 1995/02/01]

27. Freter S, Dunbar M, Koller K, et al. Risk of Pre-and Post-Operative Delirium and the Delirium Elderly At Risk (DEAR) Tool in Hip Fracture Patients. *Can Geriatr J* 2015;18(4):212-16. doi: 10.5770/cgj.18.185
28. Freter SH, Dunbar MJ, MacLeod H, et al. Predicting post-operative delirium in elective orthopaedic patients: the Delirium Elderly At-Risk (DEAR) instrument. *Age and ageing* 2005;34(2):169-71.
29. Inouye SK, Charpentier PA. Precipitating factors for delirium in hospitalized elderly persons. Predictive model and interrelationship with baseline vulnerability. *Jama* 1996;275(11):852-7. [published Online First: 1996/03/20]
30. Inouye SK, Viscoli CM, Horwitz RI, et al. A predictive model for delirium in hospitalized elderly medical patients based on admission characteristics. *Annals of internal medicine* 1993;119(6):474-81. [published Online First: 1993/09/15]
31. Inouye SK, Zhang Y, Jones RN, et al. Risk factors for delirium at discharge: development and validation of a predictive model. *Archives of internal medicine* 2007;167(13):1406-13. doi: 10.1001/archinte.167.13.1406 [published Online First: 2007/07/11]
32. Isfandiatty R, Harimurti K, Setiati S, et al. Incidence and predictors for delirium in hospitalized elderly patients: a retrospective cohort study. *Acta medica Indonesiana* 2012;44(4):290-7. [published Online First: 2013/01/15]
33. Pendlebury ST, Lovett N, Smith SC, et al. Delirium risk stratification in consecutive unselected admissions to acute medicine: validation of externally derived risk scores. *Age and ageing* 2016;45(1):60-65. doi: 10.1093/ageing/afv177
34. Kalisvaart KJ, Vreeswijk R, de Jonghe JF, et al. Risk factors and prediction of postoperative delirium in elderly hip-surgery patients: implementation and validation of a medical risk factor model. *Journal of the American Geriatrics Society* 2006;54(5):817-22. doi: 10.1111/j.1532-5415.2006.00704.x [published Online First: 2006/05/16]
35. Kim MY, Park UJ, Kim HT, et al. DELirium Prediction Based on Hospital Information (Delphi) in General Surgery Patients. *Medicine (Baltimore)* 2016;95(12):e3072. doi: 10.1097/MD.00000000000003072
36. Korc-Grodzicki B, Sun SW, Zhou Q, et al. Geriatric Assessment as a Predictor of Delirium and Other Outcomes in Elderly Patients With Cancer. *Annals of surgery* 2014 doi: 10.1097/sla.0000000000000742 [published Online First: 2014/06/03]
37. Leung JM, Sands LP, Lim E, et al. Does preoperative risk for delirium moderate the effects of postoperative pain and opiate use on postoperative delirium? *The American journal of geriatric psychiatry : official journal of the American Association for Geriatric Psychiatry* 2013;21(10):946-56. doi: 10.1016/j.jagp.2013.01.069 [published Online First: 2013/05/11]
38. Liang C-K, Chu C-L, Chou M-Y, et al. Developing a Prediction Model for Post-Operative Delirium and Long-Term Outcomes Among Older Patients Receiving Elective Orthopedic Surgery: A Prospective Cohort Study in Taiwan. *Rejuvenation Res* 2015;18(4):347-55. doi: 10.1089/rej.2014.1645
39. Maekawa Y, Sugimoto K, Yamasaki M, et al. Comprehensive Geriatric Assessment is a useful predictive tool for postoperative delirium after gastrointestinal surgery in old-old adults. *Geriatr Gerontol Int* 2015 doi: 10.1111/ggi.12587
40. Martinez JA, Belastegui A, Basabe I, et al. Derivation and validation of a clinical prediction rule for delirium in patients admitted to a medical ward: an observational study. *BMJ*

- 1  
2  
3        *Open* 2012;2(5) doi: 10.1136/bmjopen-2012-001599 [published Online First:  
4        2012/09/18]
- 5  
6 41. Moerman S, Tuinebreijer WE, de Boo M, et al. Validation of the Risk Model for Delirium in  
7        hip fracture patients. *Gen Hosp Psychiatry* 2012;34(2):153-9. doi:  
8        10.1016/j.genhosppsych.2011.11.011 [published Online First: 2012/01/10]
- 9  
10 42. O'Keefe ST, Lavan JN. Predicting delirium in elderly patients: development and validation  
11        of a risk-stratification model. *Age and ageing* 1996;25(4):317-21. [published Online  
12        First: 1996/07/01]
- 13  
14 43. Pompei P, Foreman M, Rudberg MA, et al. Delirium in hospitalized older persons: outcomes  
15        and predictors. *Journal of the American Geriatrics Society* 1994;42(8):809-15. [published  
16        Online First: 1994/08/01]
- 17  
18 44. Rudolph JL, Doherty K, Kelly B, et al. Validation of a Delirium Risk Assessment Using  
19        Electronic Medical Record Information. *Journal of the American Medical Directors  
20        Association* 2016;17(3):244-48 5p. doi: 10.1016/j.jamda.2015.10.020
- 21  
22 45. Rudolph JL, Harrington MB, Lucatoro MA, et al. Validation of a medical record-based  
23        delirium risk assessment. *Journal of the American Geriatrics Society* 2011;59 Suppl  
24        2:S289-94. doi: 10.1111/j.1532-5415.2011.03677.x
- 25  
26 46. Rudolph JL, Jones RN, Levkoff SE, et al. Derivation and validation of a preoperative  
27        prediction rule for delirium after cardiac surgery. *Circulation* 2009;119(2):229-36 8p.  
28        doi: 10.1161/CIRCULATIONAHA.108.795260
- 29  
30 47. Dworkin A, Lee DS, An AR, et al. A Simple Tool to Predict Development of Delirium After  
31        Elective Surgery. *Journal of the American Geriatrics Society* 2016;64(11):e149-e53. doi:  
32        10.1111/jgs.14428 [published Online First: 2016/09/22]
- 33  
34 48. Freter SH, George J, Dunbar MJ, et al. Prediction of delirium in fractured neck of femur as  
35        part of routine preoperative nursing care. *Age and ageing* 2005;34(4):387-8. doi:  
36        10.1093/ageing/afi099 [published Online First: 2005/06/16]
- 37  
38 49. Pendlebury ST, Lovett NG, Smith SC, et al. Delirium risk stratification in consecutive  
39        unselected admissions to acute medicine: validation of a susceptibility score based on  
40        factors identified externally in pooled data for use at entry to the acute care pathway. *Age  
41        and ageing* 2016 doi: 10.1093/ageing/afw198 [published Online First: 2016/11/07]
- 42  
43 50. Collins GS, Reitsma JB, Altman DG, et al. Transparent reporting of a multivariable  
44        prediction model for individual prognosis or diagnosis (TRIPOD): the TRIPOD  
45        statement. *BMJ (Clinical research ed)* 2015;350:g7594. doi: 10.1136/bmj.g7594  
46        [published Online First: 2015/01/09]
- 47  
48 51. Moons KG, Altman DG, Reitsma JB, et al. New Guideline for the Reporting of Studies  
49        Developing, Validating, or Updating a Multivariable Clinical Prediction Model: The  
50        TRIPOD Statement. *Advances in anatomic pathology* 2015;22(5):303-5. doi:  
51        10.1097/pap.000000000000072 [published Online First: 2015/08/12]
- 52  
53 52. Moons KG, Altman DG, Reitsma JB, et al. Transparent Reporting of a multivariable  
54        prediction model for Individual Prognosis or Diagnosis (TRIPOD): explanation and  
55        elaboration. *Annals of internal medicine* 2015;162(1):W1-73. doi: 10.7326/m14-0698  
56        [published Online First: 2015/01/07]
- 57  
58 53. Vergouwe Y, Moons KG, Steyerberg EW. External validity of risk models: Use of  
59        benchmark values to disentangle a case-mix effect from incorrect coefficients. *Am J  
60        Epidemiol* 2010;172(8):971-80. doi: 10.1093/aje/kwq223 [published Online First:  
2010/09/03]

- 1
- 2
- 3
- 4 54. Austin PC, Steyerberg EW. Events per variable (EPV) and the relative performance of
- 5 different strategies for estimating the out-of-sample validity of logistic regression models.
- 6 *Stat Methods Med Res*;0(0):0962280214558972. doi: doi:10.1177/0962280214558972
- 7 55. Steyerberg EW, Harrell FE, Jr. Prediction models need appropriate internal, internal-external,
- 8 and external validation. *J Clin Epidemiol* 2016;69:245-7. doi:
- 9 10.1016/j.jclinepi.2015.04.005 [published Online First: 2015/05/20]
- 10 56. Steyerberg EW, Vergouwe Y. Towards better clinical prediction models: seven steps for
- 11 development and an ABCD for validation. *European heart journal* 2014;35(29):1925-31.
- 12 doi: 10.1093/eurheartj/ehu207 [published Online First: 2014/06/06]
- 13 57. Steyerberg EW, Vickers AJ, Cook NR, et al. Assessing the performance of prediction
- 14 models: a framework for traditional and novel measures. *Epidemiology (Cambridge,*
- 15 *Mass)* 2010;21(1):128-38. doi: 10.1097/EDE.0b013e3181c30fb2 [published Online First:
- 16 2009/12/17]
- 17 58. Peduzzi P, Concato J, Kemper E, et al. A simulation study of the number of events per
- 18 variable in logistic regression analysis. *J Clin Epidemiol* 1996;49(12):1373-9. [published
- 19 Online First: 1996/12/01]
- 20 59. Campbell DJ. The clinical utility curve: a proposal to improve the translation of information
- 21 provided by prediction models to clinicians. *BMC research notes* 2016;9:219. doi:
- 22 10.1186/s13104-016-2028-0 [published Online First: 2016/04/16]
- 23 60. Pavlou M, Ambler G, Seaman SR, et al. How to develop a more accurate risk prediction
- 24 model when there are few events. *BMJ (Clinical research ed)* 2015;351:h3868. doi:
- 25 10.1136/bmj.h3868 [published Online First: 2015/08/13]
- 26 61. Grobman WA, Stamilio DM. Methods of clinical prediction. *American journal of obstetrics*
- 27 *and gynecology* 2006;194(3):888-94. doi: 10.1016/j.ajog.2005.09.002 [published Online
- 28 First: 2006/03/09]
- 29 62. Subramanian J, Simon R. Overfitting in prediction models - is it a problem only in high
- 30 dimensions? *Contemporary clinical trials* 2013;36(2):636-41. doi:
- 31 10.1016/j.cct.2013.06.011 [published Online First: 2013/07/03]
- 32 63. Ogundimu EO, Altman DG, Collins GS. Adequate sample size for developing prediction
- 33 models is not simply related to events per variable. *J Clin Epidemiol* 2016;76:175-82.
- 34 doi: 10.1016/j.jclinepi.2016.02.031 [published Online First: 2016/03/12]
- 35 64. Steyerberg EW, Eijkemans MJ, Harrell FE, Jr., et al. Prognostic modeling with logistic
- 36 regression analysis: in search of a sensible strategy in small data sets. *Medical decision*
- 37 *making : an international journal of the Society for Medical Decision Making*
- 38 2001;21(1):45-56. doi: 10.1177/0272989x0102100106 [published Online First:
- 39 2001/02/24]
- 40 65. Strobl AN, Vickers AJ, Van Calster B, et al. Improving patient prostate cancer risk
- 41 assessment: Moving from static, globally-applied to dynamic, practice-specific risk
- 42 calculators. *Journal of biomedical informatics* 2015;56:87-93. doi:
- 43 10.1016/j.jbi.2015.05.001 [published Online First: 2015/05/20]
- 44 66. Weng SF, Reys J, Kai J, et al. Can machine-learning improve cardiovascular risk prediction
- 45 using routine clinical data? *Plos One* 2017;12(4):e0174944. doi:
- 46 10.1371/journal.pone.0174944 [published Online First: 2017/04/05]
- 47 67. Jones RN, Marcantonio ER, Saczynski JS, et al. Preoperative Cognitive Performance
- 48 Dominates Risk for Delirium Among Older Adults. *J Geriatr Psychiatry Neurol* 2016
- 49 doi: 10.1177/0891988716666380 [published Online First: 2016/09/21]
- 50
- 51
- 52
- 53
- 54
- 55
- 56
- 57
- 58
- 59
- 60



- 1  
2  
3  
4  
5  
6  
7  
8  
9  
10  
11  
12  
13  
14  
15  
16  
17  
18  
19  
20  
21  
22  
23  
24  
25  
26  
27  
28  
29  
30  
31  
32  
33  
34  
35  
36  
37  
38  
39  
40  
41  
42  
43  
44  
45  
46  
47  
48  
49  
50  
51  
52  
53  
54  
55  
56  
57  
58  
59  
60
68. Christian LM, Glaser R, Porter K, et al. Poorer self-rated health is associated with elevated inflammatory markers among older adults. *Psychoneuroendocrinology* 2011;36(10):1495-504. doi: 10.1016/j.psyneuen.2011.04.003 [published Online First: 2011/05/24]
  69. Haring R, Feng YS, Moock J, et al. Self-perceived quality of life predicts mortality risk better than a multi-biomarker panel, but the combination of both does best. *BMC Med Res Methodol* 2011;11:103. doi: 10.1186/1471-2288-11-103 [published Online First: 2011/07/14]
  70. Moore RC, Eyler LT, Mausbach BT, et al. Complex interplay between health and successful aging: role of perceived stress, resilience, and social support. *The American journal of geriatric psychiatry : official journal of the American Association for Geriatric Psychiatry* 2015;23(6):622-32. doi: 10.1016/j.jagp.2014.08.004 [published Online First: 2014/09/14]
  71. Arnberg FK, Lekander M, Morey JN, et al. Self-rated health and interleukin-6: Longitudinal relationships in older adults. *Brain, behavior, and immunity* 2016;54:226-32. doi: 10.1016/j.bbi.2016.02.008 [published Online First: 2016/02/14]
  72. Falk H, Skoog I, Johansson L, et al. Self-rated health and its association with mortality in older adults in China, India and Latin America-a 10/66 Dementia Research Group study. *Age and ageing* 2017;46(6):932-39. doi: 10.1093/ageing/afx126 [published Online First: 2017/10/07]
  73. Woo H, Zajacova A. Predictive Strength of Self-Rated Health for Mortality Risk Among Older Adults in the United States: Does It Differ by Race and Ethnicity? *Research on aging* 2017;39(7):879-905. doi: 10.1177/0164027516637410 [published Online First: 2016/03/20]
  74. Yates JA, Clare L, Woods RT. What is the Relationship between Health, Mood, and Mild Cognitive Impairment? *J Alzheimers Dis* 2017;55(3):1183-93. doi: 10.3233/jad-160611 [published Online First: 2016/10/30]
  75. Kazmierski J, Banys A, Latek J, et al. Mild Cognitive Impairment with Associated Inflammatory and Cortisol Alterations as Independent Risk Factor for Postoperative Delirium. *Dementia & Geriatric Cognitive Disorders* 2014;38(1/2):65-78 14p. doi: 10.1159/000357454
  76. Veliz-Reissmüller G, Agüero Torres H, van der Linden J, et al. Pre-operative mild cognitive dysfunction predicts risk for post-operative delirium after elective cardiac surgery. *Aging Clinical And Experimental Research* 2007;19(3):172-77.
  77. Fong TG, Hshieh TT, Wong B, et al. Neuropsychological profiles of an elderly cohort undergoing elective surgery and the relationship between cognitive performance and delirium. *Journal of the American Geriatrics Society* 2015;63(5):977-82. doi: 10.1111/jgs.13383
  78. van Meenen LC, van Meenen DM, de Rooij SE, et al. Risk prediction models for postoperative delirium: a systematic review and meta-analysis. *Journal of the American Geriatrics Society* 2014;62(12):2383-90. doi: 10.1111/jgs.1313810.1111/jgs.13138.</p>
  79. Newman MW, O'Dwyer LC, Rosenthal L. Predicting delirium: A review of risk-stratification models. *General Hospital Psychiatry* 2015;37(5):408-13. doi: 10.1016/j.genhosppsy.2015.05.003

- 1  
2  
3 80. Campaner CP. Valoración del riesgo de delirium en pacientes mayores hospitalizados. =  
4 Delirium risk assessment in elderly hospitalized patients. *Revista Española de Geriatria y*  
5 *Gerontología* 2010;45(5):285-90. doi: 10.1016/j.regg.2010.03.011  
6  
7 81. Debray TP, Koffijberg H, Nieboer D, et al. Meta-analysis and aggregation of multiple  
8 published prediction models. *Stat Med* 2014;33(14):2341-62. doi: 10.1002/sim.6080  
9 [published Online First: 2014/04/23]  
10 82. Kim SY, Moon SK, Jung DC, et al. Pre-operative prediction of advanced prostatic cancer  
11 using clinical decision support systems: accuracy comparison between support vector  
12 machine and artificial neural network. *Korean journal of radiology* 2011;12(5):588-94.  
13 doi: 10.3348/kjr.2011.12.5.588 [published Online First: 2011/09/20]  
14  
15  
16  
17  
18  
19  
20  
21  
22  
23  
24  
25  
26  
27  
28  
29  
30  
31  
32  
33  
34  
35  
36  
37  
38  
39  
40  
41  
42  
43  
44  
45  
46  
47  
48  
49  
50  
51  
52  
53  
54  
55  
56  
57  
58  
59  
60

For peer review only

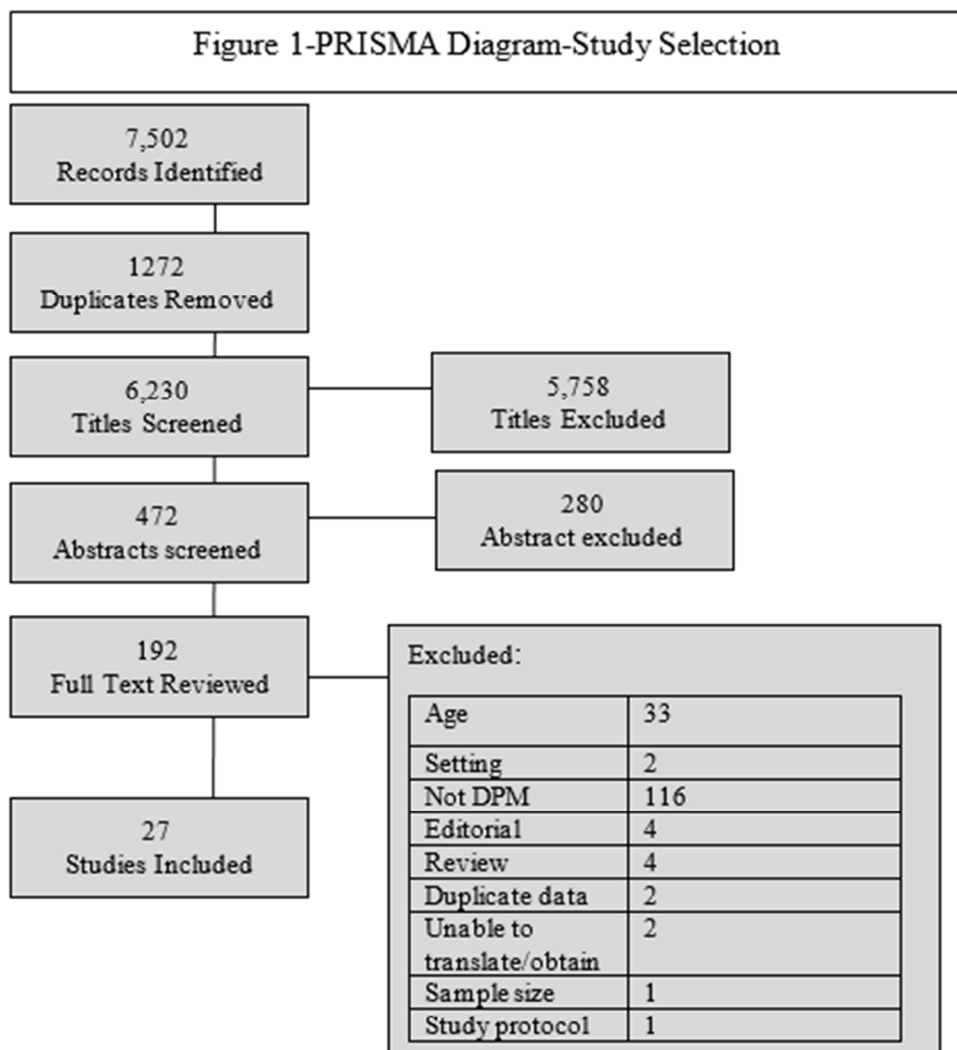

Figure 1: PRISMA Diagram - Study Selection

128x145mm (300 x 300 DPI)

**Figure 2: CHARMS Risk of Bias Assessment**

|                          |                    |            |         |                              |                      |
|--------------------------|--------------------|------------|---------|------------------------------|----------------------|
| Carrasco 2014            | +                  | +          | +       | -                            | -                    |
| De Wit 2016              | ?                  | -          | -       | +                            | +                    |
| Douglas                  | +                  | +          | +       | +                            | +                    |
| Dworkin                  | +                  | +          | +       | ?                            | -                    |
| Fisher and Flowerdew '95 | +                  | +          | +       | -                            | -                    |
| Freter 2005              | +                  | +          | +       | -                            | -                    |
| Freter 2005              | +                  | +          | +       | -                            | -                    |
| Freter 2015              | +                  | ?          | +       | +                            | +                    |
| Inouye & Charpentier '96 | +                  | +          | +       | +                            | +                    |
| Inouye 2007              | +                  | +          | +       | ?                            | +                    |
| Inouye 1993              | +                  | +          | +       | +                            | +                    |
| Isfandiatty 2012         | -                  | -          | -       | +                            | ?                    |
| Kalisvaart 2006          | +                  | +          | +       | +                            | +                    |
| Kim 2016                 | +                  | -          | +       | +                            | +                    |
| Korc-Grodzicki 2014      | -                  | +          | +       | +                            | -                    |
| Leung 2013               | +                  | +          | +       | +                            | +                    |
| Liang 2015               | +                  | +          | +       | ?                            | +                    |
| Maekawa 2015             | ?                  | +          | +       | +                            | -                    |
| Martinez 2012            | +                  | +          | +       | +                            | ?                    |
| Moerman 2012             | +                  | +          | ?       | +                            | ?                    |
| O'Keeffe & Lavan 1996    | +                  | +          | ?       | -                            | ?                    |
| Pendlebury 2016          | +                  | +          | +       | +                            | +                    |
| Pendlebury 2016          | +                  | +          | +       | +                            | +                    |
| Pompei 1994              | ?                  | +          | +       | +                            | ?                    |
| Rudolph 2009             | ?                  | +          | +       | +                            | +                    |
| Rudolph 2011             | +                  | +          | +       | -                            | +                    |
| Rudolph 2016             | +                  | +          | +       | +                            | +                    |
|                          | Study Participants | Predictors | Outcome | Sample size and Missing data | Statistical Analysis |

Figure 2 displays the CHARMS Risk of Bias assessment on all included studies.  
**Study Participants:** design of included study, sampling method, inclusion/exclusion criteria  
**Predictors:** definition, timing, and measurement  
**Outcome:** definition, timing, and measurement  
**Sample Size and Missing Data:** sample size, events per variable, missing data  
**Statistical Analysis:** selection of predictors, internal validation, type of external validation done

Figure 2: CHARMS Risk of Bias Assessment

110x202mm (300 x 300 DPI)

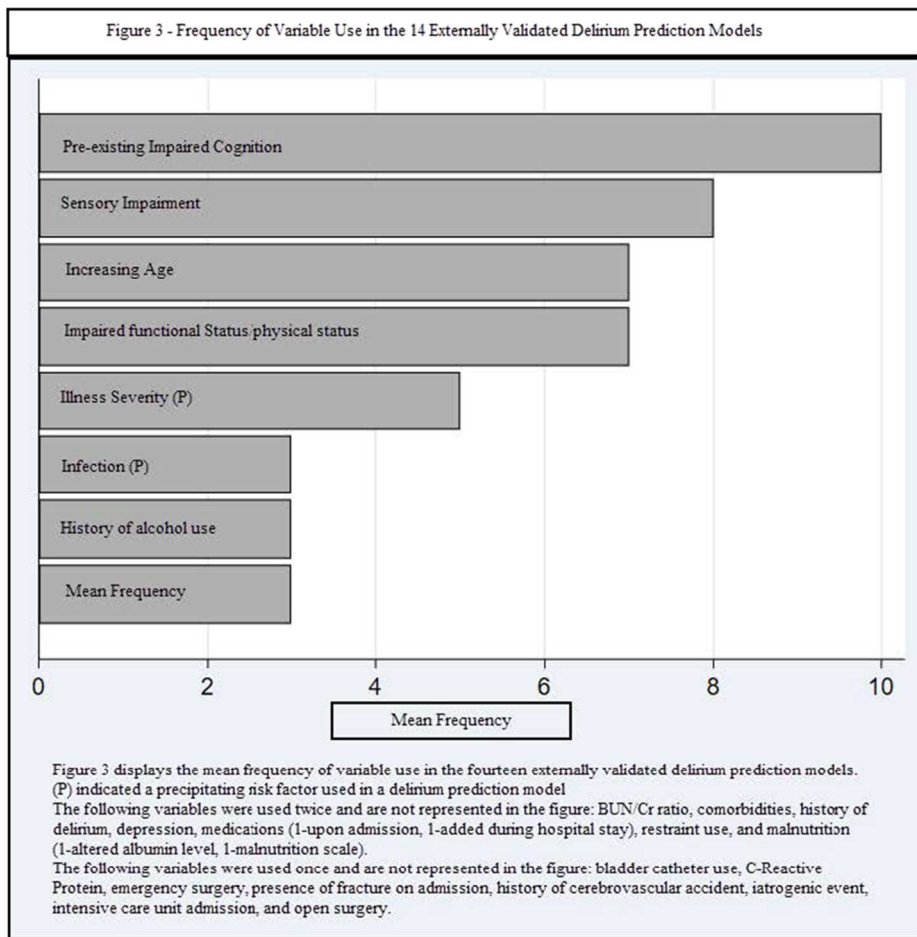

Figure 3: Frequency of Variable Use in the 14 Externally Validated Delirium Prediction Models

187x183mm (300 x 300 DPI)

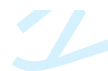

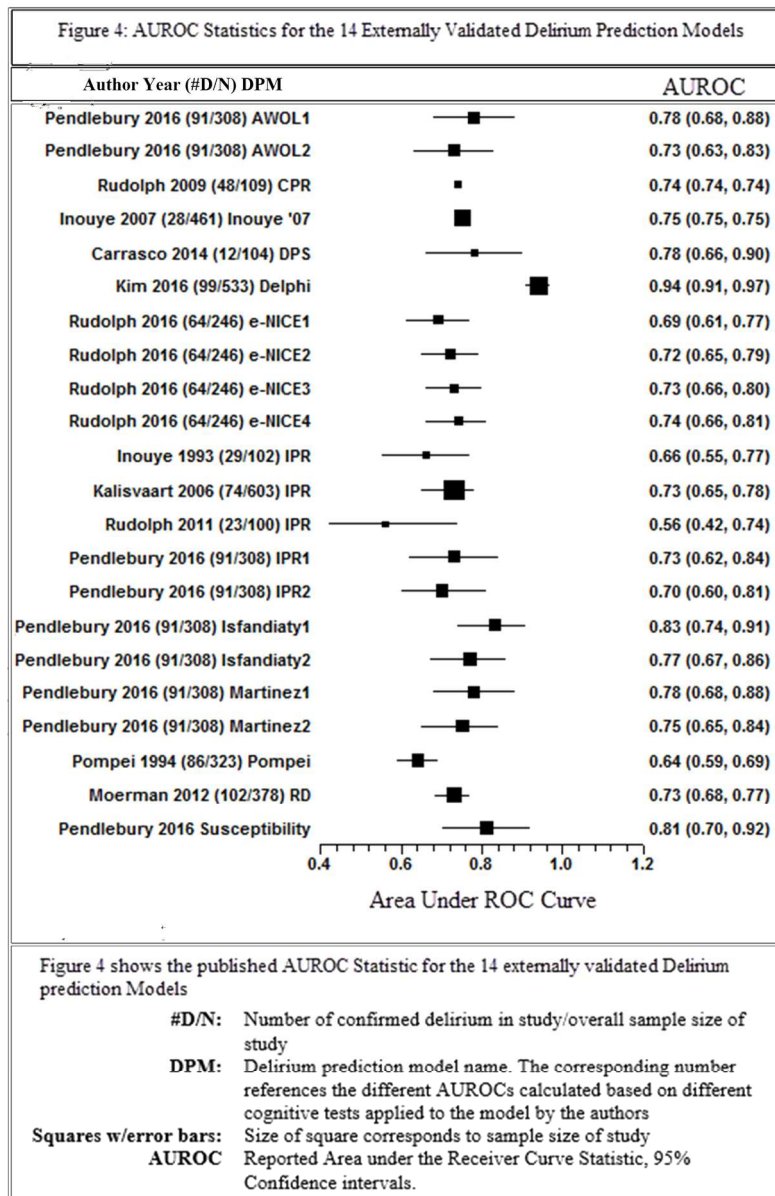

Figure 4: AUROC Statistics for the 14 Externally Validated Delirium Prediction Models

137x210mm (300 x 300 DPI)

| <b>Appendix A – Review Protocol</b> |                                                                                                                                                                                                                                                                                                                       |                                  |                                                                                            |                              |
|-------------------------------------|-----------------------------------------------------------------------------------------------------------------------------------------------------------------------------------------------------------------------------------------------------------------------------------------------------------------------|----------------------------------|--------------------------------------------------------------------------------------------|------------------------------|
| Working Title of Review             | Systematic Review of Delirium Prediction Models                                                                                                                                                                                                                                                                       |                                  | Support                                                                                    | Modifications                |
| Authors                             | 1 <sup>st</sup> & Corresponding                                                                                                                                                                                                                                                                                       | Heidi Lindroth                   | Literature search, data extraction, data synthesis and manuscript preparation.             |                              |
|                                     | Data Extraction                                                                                                                                                                                                                                                                                                       | Heidi Lindroth<br>Suzanne Purvis | Literature search, data extraction, data synthesis.                                        |                              |
|                                     | Content Experts                                                                                                                                                                                                                                                                                                       | Lisa Bratzke                     | Assisted with content related to cognition. Results review.                                |                              |
|                                     |                                                                                                                                                                                                                                                                                                                       | Roger Brown                      | Statistical content expert                                                                 |                              |
|                                     |                                                                                                                                                                                                                                                                                                                       | Mark Coburn                      | Results review, Manuscript preparation                                                     |                              |
|                                     |                                                                                                                                                                                                                                                                                                                       | Marko Mrkobrada                  | Results review, Manuscript preparation                                                     |                              |
|                                     |                                                                                                                                                                                                                                                                                                                       | Matthew TV Chan                  | Results review, Manuscript preparation                                                     |                              |
|                                     |                                                                                                                                                                                                                                                                                                                       | Daniel Davis                     | Geriatrician expertise, reviewed results, manuscript preparation.                          |                              |
|                                     |                                                                                                                                                                                                                                                                                                                       | Pratik Pandharipande             | Results review, Manuscript preparation                                                     |                              |
|                                     |                                                                                                                                                                                                                                                                                                                       | Cynthia M. Carlsson              | Geriatrician expertise, reviewed results, manuscript preparation.                          |                              |
|                                     | Mentoring                                                                                                                                                                                                                                                                                                             | Robert D. Sanders                | Mentoring author, resolved content/data disagreements b/w authors, manuscript preparation. |                              |
| Aim                                 | To identify existing prognostic delirium prediction models and evaluate their validity and statistical methodology in the older adult ( $\geq 60$ yo) acute hospital population.                                                                                                                                      |                                  |                                                                                            |                              |
| Search Terms                        | ("Delirium" OR "postoperative delirium" OR "ICU delirium" OR "ICU psychosis" OR "ICU syndrome" OR "acute confusional state" OR "acute brain dysfunction") AND ("inpatient" OR "hospital*" OR "postoperative" OR surg* OR "critical care unit" OR "intensive care unit" OR CCU OR ICU) AND ("predict*" model OR risk*) |                                  | UW-Madison Health Sciences librarian. Three meetings to refine search terms.               |                              |
| Databases searched                  | PubMed, CINAHL, PsychINFO, Cochrane, SocINDEX and Medline                                                                                                                                                                                                                                                             |                                  | Health Sciences librarian.                                                                 | Expanded to include SocINDEX |
| Timelines established               | 01/01/1990-12/31/2016                                                                                                                                                                                                                                                                                                 |                                  |                                                                                            | Originally was 12/31/15.     |

|                         |                                                                                                                                                                                                                                                                                                                                                                                                                                                                                                                                                                                                        |                  |                                                                                               |
|-------------------------|--------------------------------------------------------------------------------------------------------------------------------------------------------------------------------------------------------------------------------------------------------------------------------------------------------------------------------------------------------------------------------------------------------------------------------------------------------------------------------------------------------------------------------------------------------------------------------------------------------|------------------|-----------------------------------------------------------------------------------------------|
|                         |                                                                                                                                                                                                                                                                                                                                                                                                                                                                                                                                                                                                        |                  | Expanded to include all of 2016.                                                              |
| Inclusion criteria      | <ul style="list-style-type: none"> <li>• Age <math>\geq</math> 60</li> <li>• Inpatient population</li> <li>• Developing and/or validating a delirium prediction model</li> </ul>                                                                                                                                                                                                                                                                                                                                                                                                                       |                  | Age expanded from $\geq$ 70 years of age due to the literature                                |
| Exclusion criteria      | <ul style="list-style-type: none"> <li>• Emergency department</li> <li>• Hospice/palliative care</li> <li>• Pediatric population</li> <li>• Related to alcohol withdrawal</li> <li>• <math>\leq</math>50 sample size</li> </ul>                                                                                                                                                                                                                                                                                                                                                                        | Mentoring author | Sample size criteria added to build rigor in the studies that were included in the sys review |
| Selection process       | Studies will be selected based on the inclusion/exclusion criteria. The data extraction authors (HL and SP) will conduct the literature search independently and meet monthly to discuss findings. Any disagreements will be resolved by the mentoring author (RDS)                                                                                                                                                                                                                                                                                                                                    |                  |                                                                                               |
| Data Management         | A shared folder on the UW-Madison Box account will be created to share documents, data and meeting information.                                                                                                                                                                                                                                                                                                                                                                                                                                                                                        |                  |                                                                                               |
| Data collection process | Data will be collected independently by HL and SP then data points will be shared at monthly meetings. Data collection tables will be created using Microsoft Excel then uploaded to the shared Box account. Any disagreement between authors will be resolved by the mentoring author (RDS).                                                                                                                                                                                                                                                                                                          |                  |                                                                                               |
| Data points collected   | <ul style="list-style-type: none"> <li>• Characteristics of studies (design, population, sample size)</li> <li>• Outcome measure including how it was identified, measured, defined. Prevalence.</li> <li>• Statistical methods applied</li> <li>• Statistical information about the delirium prediction models (sensitivity, specificity, positive predictive value, negative predictive value, AUROC)</li> <li>• Characteristics of DPMs (variables used, scoring, development)</li> <li>• Cognitive measures used in studies.</li> <li>• Criteria to fulfill the Newcastle Ottawa Scale.</li> </ul> |                  |                                                                                               |
| Outcomes                | <ul style="list-style-type: none"> <li>• AUROC will be the primary outcome measure</li> <li>• Characteristics of DPMs (variables, statistics)</li> <li>• Cognitive tests used</li> </ul>                                                                                                                                                                                                                                                                                                                                                                                                               |                  |                                                                                               |



|                        |                                                                                                                                                                       |  |  |
|------------------------|-----------------------------------------------------------------------------------------------------------------------------------------------------------------------|--|--|
| Data synthesis         | The first/corresponding author (HL) will synthesize the data into the manuscript. The co-authors will verify this.<br>RB will complete the meta-analysis.             |  |  |
| Manuscript preparation | HL will complete manuscript preparation. All co-authors are responsible for reviewing content and data to assure correctness and complete synthesis of data gathered. |  |  |

For peer review only

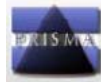

# PRISMA 2009 Checklist

| Section/topic                      | #  | Checklist item                                                                                                                                                                                                                                                                                              | Reported on page # |
|------------------------------------|----|-------------------------------------------------------------------------------------------------------------------------------------------------------------------------------------------------------------------------------------------------------------------------------------------------------------|--------------------|
| <b>TITLE</b>                       |    |                                                                                                                                                                                                                                                                                                             |                    |
| Title                              | 1  | Identify the report as a systematic review, meta-analysis, or both.                                                                                                                                                                                                                                         | 1                  |
| <b>ABSTRACT</b>                    |    |                                                                                                                                                                                                                                                                                                             |                    |
| Structured summary                 | 2  | Provide a structured summary including, as applicable: background; objectives; data sources; study eligibility criteria, participants, and interventions; study appraisal and synthesis methods; results; limitations; conclusions and implications of key findings; systematic review registration number. | 2                  |
| <b>INTRODUCTION</b>                |    |                                                                                                                                                                                                                                                                                                             |                    |
| Rationale                          | 3  | Describe the rationale for the review in the context of what is already known.                                                                                                                                                                                                                              | 4                  |
| Objectives                         | 4  | Provide an explicit statement of questions being addressed with reference to participants, interventions, comparisons, outcomes, and study design (PICOS).                                                                                                                                                  | 4                  |
| <b>METHODS</b>                     |    |                                                                                                                                                                                                                                                                                                             |                    |
| Protocol and registration          | 5  | Indicate if a review protocol exists, if and where it can be accessed (e.g., Web address), and, if available, provide registration information including registration number.                                                                                                                               | 4                  |
| Eligibility criteria               | 6  | Specify study characteristics (e.g., PICOS, length of follow-up) and report characteristics (e.g., years considered, language, publication status) used as criteria for eligibility, giving rationale.                                                                                                      | 4-5                |
| Information sources                | 7  | Describe all information sources (e.g., databases with dates of coverage, contact with study authors to identify additional studies) in the search and date last searched.                                                                                                                                  | 5                  |
| Search                             | 8  | Present full electronic search strategy for at least one database, including any limits used, such that it could be repeated.                                                                                                                                                                               | 5                  |
| Study selection                    | 9  | State the process for selecting studies (i.e., screening, eligibility, included in systematic review, and, if applicable, included in the meta-analysis).                                                                                                                                                   | 5                  |
| Data collection process            | 10 | Describe method of data extraction from reports (e.g., piloted forms, independently, in duplicate) and any processes for obtaining and confirming data from investigators.                                                                                                                                  | 5-6                |
| Data items                         | 11 | List and define all variables for which data were sought (e.g., PICOS, funding sources) and any assumptions and simplifications made.                                                                                                                                                                       | 6                  |
| Risk of bias in individual studies | 12 | Describe methods used for assessing risk of bias of individual studies (including specification of whether this was done at the study or outcome level), and how this information is to be used in any data synthesis.                                                                                      | 6-7                |
| Summary measures                   | 13 | State the principal summary measures (e.g., risk ratio, difference in means).                                                                                                                                                                                                                               | 6                  |
| Synthesis of results               | 14 | Describe the methods of handling data and combining results of studies, if done, including measures of consistency (e.g., $I^2$ ) for each meta-analysis.                                                                                                                                                   | 6                  |

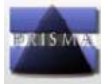

# PRISMA 2009 Checklist

| Section/topic                 | #  | Checklist item                                                                                                                                                                                           | Reported on page #          |
|-------------------------------|----|----------------------------------------------------------------------------------------------------------------------------------------------------------------------------------------------------------|-----------------------------|
| Risk of bias across studies   | 15 | Specify any assessment of risk of bias that may affect the cumulative evidence (e.g., publication bias, selective reporting within studies).                                                             | 6                           |
| Additional analyses           | 16 | Describe methods of additional analyses (e.g., sensitivity or subgroup analyses, meta-regression), if done, indicating which were pre-specified.                                                         | 6                           |
| <b>RESULTS</b>                |    |                                                                                                                                                                                                          |                             |
| Study selection               | 17 | Give numbers of studies screened, assessed for eligibility, and included in the review, with reasons for exclusions at each stage, ideally with a flow diagram.                                          | 7                           |
| Study characteristics         | 18 | For each study, present characteristics for which data were extracted (e.g., study size, PICOS, follow-up period) and provide the citations.                                                             | 7                           |
| Risk of bias within studies   | 19 | Present data on risk of bias of each study and, if available, any outcome level assessment (see item 12).                                                                                                | 7-8<br>Table 1,<br>Figure 2 |
| Results of individual studies | 20 | For all outcomes considered (benefits or harms), present, for each study: (a) simple summary data for each intervention group (b) effect estimates and confidence intervals, ideally with a forest plot. | Table 1, 2<br>Figure 4      |
| Synthesis of results          | 21 | Present results of each meta-analysis done, including confidence intervals and measures of consistency.                                                                                                  | N/A                         |
| Risk of bias across studies   | 22 | Present results of any assessment of risk of bias across studies (see Item 15).                                                                                                                          | Table 1,<br>Figure 2        |
| Additional analysis           | 23 | Give results of additional analyses, if done (e.g., sensitivity or subgroup analyses, meta-regression [see Item 16]).                                                                                    | 8-19                        |
| <b>DISCUSSION</b>             |    |                                                                                                                                                                                                          |                             |
| Summary of evidence           | 24 | Summarize the main findings including the strength of evidence for each main outcome; consider their relevance to key groups (e.g., healthcare providers, users, and policy makers).                     | 19-20                       |
| Limitations                   | 25 | Discuss limitations at study and outcome level (e.g., risk of bias), and at review-level (e.g., incomplete retrieval of identified research, reporting bias).                                            | 19-24                       |
| Conclusions                   | 26 | Provide a general interpretation of the results in the context of other evidence, and implications for future research.                                                                                  | 19-26                       |
| <b>FUNDING</b>                |    |                                                                                                                                                                                                          |                             |
| Funding                       | 27 | Describe sources of funding for the systematic review and other support (e.g., supply of data); role of funders for the systematic review.                                                               | 6                           |

From: Moher D, Liberati A, Tetzlaff J, Altman DG, The PRISMA Group (2009). Preferred Reporting Items for Systematic Reviews and Meta-Analyses: The PRISMA Statement. PLoS Med 6(7): e1000097. doi:10.1371/journal.pmed1000097

For peer review only - <http://bmjopen.bmj.com/site/about/guidelines.xhtml>  
For more information, visit: [www.prisma-statement.org](http://www.prisma-statement.org).

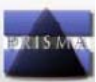

# PRISMA 2009 Checklist

- 1
- 2
- 3
- 4
- 5
- 6
- 7
- 8
- 9
- 10
- 11
- 12
- 13
- 14
- 15
- 16
- 17
- 18
- 19
- 20
- 21
- 22
- 23
- 24
- 25
- 26
- 27
- 28
- 29
- 30
- 31
- 32
- 33
- 34
- 35
- 36
- 37
- 38
- 39
- 40
- 41
- 42
- 43
- 44
- 45
- 46
- 47

For peer review only

CHARMS 2014 Relevant items to extract from individual studies in a systematic review of prediction models

| Domain                                       | Key items                                                                                                                                                                                                                                                         | Reported on page # |
|----------------------------------------------|-------------------------------------------------------------------------------------------------------------------------------------------------------------------------------------------------------------------------------------------------------------------|--------------------|
| <b>SOURCE OF DATA</b>                        | Source of data (e.g., cohort, case-control, randomized trial participants, or registry data)                                                                                                                                                                      | 7                  |
| <b>PARTICIPANTS</b>                          | Participant eligibility and recruitment method (e.g., consecutive participants, location, number of centers, setting, inclusion and exclusion criteria)                                                                                                           | 7                  |
|                                              | Participant description                                                                                                                                                                                                                                           | 7                  |
|                                              | Details of treatments received, if relevant                                                                                                                                                                                                                       | 7                  |
|                                              | Study dates                                                                                                                                                                                                                                                       | 7                  |
| <b>OUTCOME(S) TO BE PREDICTED</b>            | Definition and method for measurement of outcome                                                                                                                                                                                                                  | 11                 |
|                                              | Was the same outcome definition (and method for measurement) used in all patients?                                                                                                                                                                                | 11                 |
|                                              | Type of outcome (e.g., single or combined endpoints)                                                                                                                                                                                                              | 11                 |
|                                              | Was the outcome assessed without knowledge of the candidate predictors (i.e., blinded)?                                                                                                                                                                           | 11                 |
|                                              | Were candidate predictors part of the outcome (e.g., in panel or consensus diagnosis)?                                                                                                                                                                            | 11                 |
|                                              | Time of outcome occurrence or summary of duration of follow-up                                                                                                                                                                                                    | 11                 |
| <b>CANDIDATE PREDICTORS (OR INDEX TESTS)</b> | Number and type of predictors (e.g., demographics, patient history, physical examination, additional testing, disease characteristics)                                                                                                                            | 12-17              |
|                                              | Definition and method for measurement of candidate predictors                                                                                                                                                                                                     | 12-17              |
|                                              | Timing of predictor measurement (e.g., at patient presentation, at diagnosis, at treatment initiation)                                                                                                                                                            | 7                  |
|                                              | Were predictors assessed blinded for outcome, and for each other (if relevant)?                                                                                                                                                                                   | N/A                |
|                                              | Handling of predictors in the modelling (e.g., continuous, linear, non-linear transformations or categorised)                                                                                                                                                     | 11-12              |
| <b>SAMPLE SIZE</b>                           | Number of participants and number of outcomes/events                                                                                                                                                                                                              | Table 1            |
|                                              | Number of outcomes/events in relation to the number of candidate predictors (Events Per Variable)                                                                                                                                                                 | 18                 |
| <b>MISSING DATA</b>                          | Number of participants with any missing value (include predictors and outcomes)                                                                                                                                                                                   | Appendix B         |
|                                              | Number of participants with missing data for each predictor                                                                                                                                                                                                       |                    |
|                                              | Handling of missing data (e.g., complete-case analysis, imputation, or other methods)                                                                                                                                                                             | Appendix B         |
| <b>MODEL DEVELOPMENT</b>                     | Modelling method (e.g., logistic, survival, neural network, or machine learning techniques)                                                                                                                                                                       | Table 1, pg 11     |
|                                              | Modelling assumptions satisfied                                                                                                                                                                                                                                   | Not reported       |
|                                              | Method for selection of predictors <b>for inclusion</b> in multivariable modelling (e.g., all candidate predictors, pre-selection based on unadjusted association with the outcome)                                                                               | 12                 |
|                                              | Method for selection of predictors <b>during multivariable modelling</b> (e.g., full model approach, backward or forward selection) and criteria used (e.g., p-value, Akaike Information Criterion)                                                               | 12                 |
|                                              | Shrinkage of predictor weights or regression coefficients (e.g., no shrinkage, uniform shrinkage, penalized estimation)                                                                                                                                           | 12,18              |
| <b>MODEL PERFORMANCE</b>                     | Calibration (calibration plot, calibration slope, Hosmer-Lemeshow test) and Discrimination (C-statistic, D-statistic, log-rank) measures with confidence intervals                                                                                                | Table 2, 17-18     |
|                                              | Classification measures (e.g., sensitivity, specificity, predictive values, net reclassification improvement) and whether a-priori cut points were used                                                                                                           | Table 2, 18-19     |
| <b>MODEL EVALUATION</b>                      | Method used for testing model performance: development dataset only (random split of data, resampling methods e.g. bootstrap or cross-validation, none) or separate external validation (e.g. temporal, geographical, different setting, different investigators) | 12                 |
|                                              | In case of poor validation, whether model was adjusted or updated (e.g., intercept recalibrated, predictor effects adjusted, or new predictors added)                                                                                                             | Table 2            |
| <b>RESULTS</b>                               | Final and other multivariable models (e.g., basic, extended, simplified) presented, including predictor weights or regression coefficients, intercept, baseline survival, model performance measures (with standard errors or confidence intervals)               | Table 2, 17-18     |
|                                              | Any alternative presentation of the final prediction models, e.g., sum score, nomogram, score chart, predictions for specific risk subgroups with performance                                                                                                     | Table 2            |
|                                              | Comparison of the distribution of predictors (including missing data) for development and validation datasets                                                                                                                                                     | Table 2            |
| <b>INTERPRETATION AND DISCUSSION</b>         | Interpretation of presented models (confirmatory, i.e., model useful for practice versus exploratory, i.e., more research needed)                                                                                                                                 | 19-26              |
|                                              | Comparison with other studies, discussion of generalizability, strengths and limitations.                                                                                                                                                                         | 19-26              |

# BMJ Open

## Systematic Review of Prediction Models for Delirium in the Older Adult Inpatient

|                                 |                                                                                                                                                                                                                                                                                                                                                                                                                                                                                                                                                                                                                                                                                                                                                                                                                                                                                                                                                                                                                                                                                                                            |
|---------------------------------|----------------------------------------------------------------------------------------------------------------------------------------------------------------------------------------------------------------------------------------------------------------------------------------------------------------------------------------------------------------------------------------------------------------------------------------------------------------------------------------------------------------------------------------------------------------------------------------------------------------------------------------------------------------------------------------------------------------------------------------------------------------------------------------------------------------------------------------------------------------------------------------------------------------------------------------------------------------------------------------------------------------------------------------------------------------------------------------------------------------------------|
| Journal:                        | <i>BMJ Open</i>                                                                                                                                                                                                                                                                                                                                                                                                                                                                                                                                                                                                                                                                                                                                                                                                                                                                                                                                                                                                                                                                                                            |
| Manuscript ID                   | bmjopen-2017-019223.R2                                                                                                                                                                                                                                                                                                                                                                                                                                                                                                                                                                                                                                                                                                                                                                                                                                                                                                                                                                                                                                                                                                     |
| Article Type:                   | Research                                                                                                                                                                                                                                                                                                                                                                                                                                                                                                                                                                                                                                                                                                                                                                                                                                                                                                                                                                                                                                                                                                                   |
| Date Submitted by the Author:   | 13-Mar-2018                                                                                                                                                                                                                                                                                                                                                                                                                                                                                                                                                                                                                                                                                                                                                                                                                                                                                                                                                                                                                                                                                                                |
| Complete List of Authors:       | Lindroth, Heidi; University of Wisconsin Madison School of Medicine and Public Health, Department of Anesthesiology; University of Wisconsin Madison Graduate School, School of Nursing<br>Bratzke, Lisa; University of Wisconsin-Madison, School of Nursing<br>Purvis, Suzanne; University of Wisconsin Hospital and Clinics, Nursing<br>Brown, Roger; University of Wisconsin Madison, School of Nursing<br>Coburn, Mark; Uniklinik RWTH Aachen, Anaesthesiology<br>Mrkobrada, Marko; Western University, Medicine<br>Chan, MTV; The Chinese University of Hong Kong, Anesthesia and Intensive Care<br>Davis, Daniel; University College London, MRC Unit for Lifelong Health and Ageing ; University College London<br>Pandharipande, Pratik; Vanderbilt University School of Medicine<br>Carlsson, Cynthia; William S. Middleton Veteran's Administration Geriatric Research Education and Clinical Center (GRECC), GRECC; University of Wisconsin Madison School of Medicine and Public Health<br>Sanders, Robert; University of Wisconsin Madison School of Medicine and Public Health, Department of Anesthesiology |
| <b>Primary Subject Heading</b>: | Geriatric medicine                                                                                                                                                                                                                                                                                                                                                                                                                                                                                                                                                                                                                                                                                                                                                                                                                                                                                                                                                                                                                                                                                                         |
| Secondary Subject Heading:      | Neurology                                                                                                                                                                                                                                                                                                                                                                                                                                                                                                                                                                                                                                                                                                                                                                                                                                                                                                                                                                                                                                                                                                                  |
| Keywords:                       | Delirium, GERIATRIC MEDICINE, Statistic                                                                                                                                                                                                                                                                                                                                                                                                                                                                                                                                                                                                                                                                                                                                                                                                                                                                                                                                                                                                                                                                                    |
|                                 |                                                                                                                                                                                                                                                                                                                                                                                                                                                                                                                                                                                                                                                                                                                                                                                                                                                                                                                                                                                                                                                                                                                            |

SCHOLARONE™  
Manuscripts

## Systematic Review of Prediction Models for Delirium in the Older Adult Inpatient

Heidi Lindroth, Lisa Bratzke, Suzanne Purvis, Roger Brown, Mark Coburn, Marko Mrkobrada, Matthew TV Chan, Daniel Davis, Pratik Pandharipande, Cynthia M. Carlsson, Robert D. Sanders University of Wisconsin School of Medicine and Public Health, Department of Anesthesiology, School of Nursing, 600 Highland Avenue, Madison, WI 53792 Heidi Lindroth BSN PhD Candidate<sup>1</sup>

University of Wisconsin School of Nursing, 701 Highland Avenue, Madison, WI 53705 Lisa Bratzke PhD Assistant Professor<sup>2</sup>

University Hospital, 600 Highland Avenue, Madison, WI 53792 Suzanne Purvis DNP, Clinical Nurse Specialist<sup>3</sup>

University of Wisconsin School of Nursing, 701 Highland Avenue, Madison, WI 53705 Roger L. Brown PhD, Professor<sup>4</sup>

University Hospital RWTH Aachen, Department of Anesthesiology, Pauwelsstrasse 30, 52074 Aachen, Mark Coburn MD, Professor<sup>5</sup>

Western University, Schulich School of Medicine and Dentistry, 339 Windermere Road, Room B9-100, London ON N5X 3W6, Marko Mrkobrada MD Associate Professor<sup>6</sup>

The Chinese University of Hong Kong, Department of Anaesthesia and Intensive Care, 4/F Main Clinical Block and Trauma Center, Prince of Wales Hospital, Hong Kong Special Administrative Region, China, Matthew TV Chan, MB, BS, PhD, Professor<sup>7</sup>

MRC Unit for Lifelong Health and Ageing at UCL, 33 Bedford Place, London, WC1B 5JU, Daniel Davis PhD MRCP, Senior Clinical Researcher<sup>8</sup>

Vanderbilt University Medical Center, Department of Anesthesiology, 1211 Medical Center Drive, Nashville TN 37322, Pratik Pandharipande MD, Chief, Division of Anesthesiology Critical Care Medicine<sup>9</sup>

University of Wisconsin School of Medicine and Public Health, Madison VA Geriatric Research Education and Clinical Center (GRECC) (D4211), 2500 Overlook Terrace, Madison, WI, 53705, Cynthia M. Carlsson, MD, MS, Associate Professor of Medicine, Division of Geriatrics<sup>10</sup>

University of Wisconsin School of Medicine and Public Health, Department of Anesthesiology, 600 Highland Avenue, Madison, WI 53792, Robert D. Sanders MBBS PhD FRCA, Assistant Professor<sup>11</sup>

**+Corresponding author:** *Heidi Lindroth, Department of Anesthesiology, University of Wisconsin School of Medicine and Public Health, 600 Highland Avenue, B6/319 CSC Madison, WI 53792-3272 Telephone: 608-262-6469 Fax: 608-263-0575 Madison, USA. Email: [hlindroth@wisc.edu](mailto:hlindroth@wisc.edu)*

Word count: 4043

## Objective

To identify existing prognostic delirium prediction models and evaluate their validity and statistical methodology in the older adult ( $\geq 60$ yo) acute hospital population.

## Design

Systematic review

## Data Sources and methods

PubMed, CINAHL, PsychINFO, SocINFO, Cochrane, Web of Science, and EMBASE were searched from 1 January 1990 to 31 December 2016. The PRISMA and CHARMS Statement guided protocol development. Inclusion criteria: Age  $\geq 60$ , inpatient, developed/validated a prognostic delirium prediction model. Exclusion criteria: alcohol-related delirium, sample size  $\leq 50$ . The primary performance measures were calibration and discrimination statistics. Two authors independently conducted search and extracted data. The synthesis of data was done by the first author. Disagreement was resolved by the mentoring author.

## Results

The initial search resulted in 7,502 studies. Following full-text review of 192 studies, 33 were excluded based on age criteria ( $< 60$  yrs) and 27 met the defined criteria. Twenty-three delirium prediction models were identified, fourteen were externally validated and three were internally validated. The following populations were represented: 11-medical, 3-medical/surgical, and 13-surgical. The assessment of delirium was often non-systematic resulting in varied incidence. Fourteen models were externally validated with an AUROC range from 0.52-0.94. Limitations in design, data collection methods, and model metric reporting statistics were identified.

## Conclusions

Delirium prediction models for older adults show variable and typically inadequate predictive



1  
2  
3 capabilities. Our review highlights the need for development of robust models to predict delirium  
4  
5 in older inpatients. We provide recommendations for the development of such models.  
6  
7

## 8 **Funding**

9  
10 Department of Anesthesiology, University of Wisconsin-Madison.

11  
12 1K23AG055700-01A1

13  
14 R01 NHLBI (HL111111) and research grant from Hospira Inc., NIH collaboration

15  
16 All authors completed ICMJE disclosure forms and no conflicts of interest declared.  
17  
18

## 19 **Keywords**

20  
21 Delirium. Aging. Cognition. Prediction. Statistical Models.  
22  
23

## 24 **Strengths and Limitations of this Study**

- 25
- 26 • This study used the PRISMA Statement and the CHARMS checklist to develop a  
27 protocol involving comprehensive search terms and databases.
  - 28 • The assembled interprofessional authorship team contributed different perspectives on  
29 delirium prediction models and statistical methodology.
  - 30 • This review focused on a narrow population, older adult inpatients, and could be  
31 expanded to include all ages and settings including palliative care, long term care and the  
32 emergency room.  
33  
34  
35  
36  
37  
38  
39  
40  
41  
42  
43  
44  
45  
46  
47  
48  
49  
50  
51  
52  
53  
54  
55  
56  
57  
58  
59  
60

## INTRODUCTION

Delirium is an acute disturbance of consciousness and cognition precipitated by an acute event such as sudden illness, infection, or surgery. This syndrome is a serious public health concern, as up to 50% of hospitalised older adults will experience delirium in medical and surgical populations.<sup>1-3</sup> Delirium has been independently associated with increased mortality, morbidity in terms of impaired cognition and functional disability along with an estimated annual U.S. expenditure of \$152 billion.<sup>4-9</sup> Prediction models allow clinicians to forecast which individuals are at a higher risk for the development of a particular disease process and target specific interventions at the identified risk profile.<sup>10-13</sup> At present, an extensive list of modifiable and non-modifiable, predisposing, and precipitating delirium risk factors encumbers clinicians, hindering the ability to select the most important or contributing risk factor.<sup>1 14</sup> An accurate and timely delirium prediction model would formalize the highest impact risk factors into a powerful tool, facilitating early implementation of prevention measures.<sup>11</sup> This systematic review expands on previous published reviews on delirium prediction models by integrating both medical and surgical populations while examining statistical aspects of each study including reporting metrics and includes recently published models.

### Aim

Our aim was to provide important recommendations on study design for future delirium prediction models while integrating knowledge gained from the study of both medical and surgical populations. We conducted a systematic review of the literature focusing on the identification and subsequent validity of existing prognostic delirium prediction models in the older adult ( $\geq 60$  years old) acute hospital population.

## METHODS

1  
2  
3 This systematic review followed the protocol developed from the PRISMA Statement and the  
4 CHARMS checklist (Appendix A).<sup>15 16</sup> A delirium prediction model was defined as a statistical  
5 model that either stratified individuals for their level of delirium risk, or assigned a risk score to  
6 an individual based on the number and/or weighted value of predetermined modifiable and non-  
7 modifiable risk factors of delirium present. This review included studies focused on 1) older  
8 adult ( $\geq 60$  years) population, (the U.S. Center for Disease Control and Prevention and United  
9 Nations define an older adult as 60 years of age and older)<sup>17 18</sup>, 2) inpatient hospital setting, 3)  
10 publication dates of 1 January 1990 to 31 December 2016, and 4) developed and/or validated  
11 delirium prediction models. Studies were excluded if they 1) studied a different patient  
12 population (i.e. emergency department, skilled nursing facilities, palliative care, and hospice) as  
13 these are unique patient populations with characteristics requiring specific foci and are not  
14 readily generalizable to a medical or surgical inpatient hospital setting. Further, recommended  
15 therapies for treatment of delirium symptoms vary between the populations.<sup>19 20</sup> 2) related to  
16 alcohol withdrawal, or delirium tremens, as the presence of alcohol withdrawal complicates  
17 delirium assessment, and 3) had a sample size  $\leq 50$  for methodological reasons (i.e.  
18 underpowered). All study designs were included. Studies were not limited by timeframe of  
19 delirium development (prevalent vs incident), however, only prognostic statistics were discussed.  
20 The search terms were as follows: (“Delirium” OR “postoperative delirium” OR “ICU  
21 delirium” OR “ICU psychosis” OR “ICU syndrome” OR “acute confusional state” OR “acute  
22 brain dysfunction”) AND (“inpatient” OR “hospital\*” OR “postoperative” OR surg\* OR  
23 “critical care unit” OR “intensive care unit” OR CCU OR ICU) AND (“predict\*” model OR  
24 risk\*). Electronic databases of PubMed, CINAHL, PsycINFO, Cochrane Database of Systematic  
25 Reviews, SocINDEX, Web of Science, and EMBASE were searched. Studies using a language  
26  
27  
28  
29  
30  
31  
32  
33  
34  
35  
36  
37  
38  
39  
40  
41  
42  
43  
44  
45  
46  
47  
48  
49  
50  
51  
52  
53  
54  
55  
56  
57  
58  
59  
60

1  
2  
3 other than English were included if translation was available through the University of  
4  
5 Wisconsin-Madison Health Sciences Librarian. Bibliographies of identified studies were hand-  
6  
7 searched for additional references. Study quality was assessed through the Newcastle-Ottawa  
8  
9 Scale (NOS)<sup>21</sup> for case-control and cohort studies. Risk of bias was assessed through the  
10  
11 CHARMS checklist.<sup>15</sup> Two authors (HL, SP) independently performed data collection, data  
12  
13 extraction, and assessed study quality, with any disagreement resolved by RDS.  
14  
15

### 16 17 **Outcomes**

18  
19 Data extracted included: 1) study characteristics (study design, population, sample size), 2)  
20  
21 outcome measure (method of identification and diagnosis, frequency, and length of screening),  
22  
23 3) model performance information including the diagnostic accuracy of the delirium prediction  
24  
25 models, calibration metrics, and events per variable 4) characteristics of the models (variables  
26  
27 used in model, scoring/stratification system), 5) cognitive measures used in the study and 6)  
28  
29 statistical methods applied for analysis. Five authors were contacted for missing or incomplete  
30  
31 data. Four responses were received.  
32  
33  
34

### 35 36 **Statistics**

37  
38 Model performance was assessed through calibration and classification metrics.<sup>15</sup> The AUROC  
39  
40 was the primary measure collected to evaluate the discriminatory ability of the delirium  
41  
42 prediction models. Clinical utility statistics such as sensitivity, specificity, positive predictive  
43  
44 values, negative predictive values, odds ratios, relative risk statistics and use of decision curve  
45  
46 analysis or clinical utility cure analysis were also collected from each delirium prediction model  
47  
48 in reference to the model's reported cut-off value. Goodness-of-fit statistics including Chi-square  
49  
50 ( $\chi^2$ ) and Hosmer-Lemeshow tests were collected to evaluate effective model calibration. Studies  
51  
52 were also assessed for the inclusion of calibration plots and slopes. Model calibration refers to  
53  
54  
55  
56  
57  
58  
59  
60

1  
2  
3 the agreement between observed outcomes and predictions.<sup>22</sup> Secondary pre-planned outcome  
4 measures included cognitive assessments, and predictive variable use per model.  
5  
6

### 7 **Role of the Funding Source**

8  
9  
10 The funding sources named has no role in this study. All authors had full access to all the data in  
11 the study and shared responsibility for the decision to submit the publication.  
12  
13

### 14 **Patient and Public Involvement**

15  
16  
17 Neither patients nor the public were involved with the development or design of this study.  
18

## 19 **RESULTS**

20  
21 Twenty-seven studies were identified for inclusion.<sup>23-47</sup> The initial search resulted in 7,502  
22 citations, with 192 studies chosen for full-text review as detailed in the PRISMA diagram  
23 (Figure 1). We did not identify any relevant, unpublished studies for this review. The inclusion  
24 criteria were modified for two studies that developed models in younger populations but these  
25 models were externally validated in the target population of this review (age  $\geq 60$ ).<sup>25 40</sup>  
26  
27

28  
29  
30  
31  
32  
33 Twenty-three delirium prediction models were developed, fourteen were externally validated<sup>23 27</sup>  
34  
35 and three were internally validated.<sup>24 37 42</sup> Prospective cohort design was used in  
36  
37 23 studies.<sup>23 25-31 33-35 37-49</sup> Retrospective design was used in four studies.<sup>24 32 36 44</sup> Nineteen studies  
38  
39 used consecutive sampling methods,<sup>23 25-31 33 34 38 40-42 44 45 47-49</sup> two of these were part of a  
40  
41 randomized control trial.<sup>34 41</sup> Eleven studies focused on the medical population<sup>23 25 29-33 40 42 45 48</sup>,  
42  
43 three included medical and surgical<sup>24 43 44</sup> and thirteen recruited a surgical population (seven-  
44  
45 orthopaedic<sup>26-28 34 38 41 49</sup>, one-cardiac<sup>46</sup>, two-noncardiac<sup>37 47</sup>, one general surgery<sup>35</sup>, two-  
46  
47 oncological<sup>36 39</sup>). None of the identified studies focused on critical care patients. Data collection  
48  
49 occurred upon admission in seventeen studies<sup>23 25 27 29-31 33-35 40-45 48 49</sup>; participants were  
50  
51 approached within forty-eight hours of admission. Seven studies collected data pre-operatively  
52  
53  
54  
55  
56  
57  
58  
59  
60

1  
2  
3 then followed participants post-operatively.<sup>26 28 37-39 46 47</sup> Data collection overlapped with  
4  
5 delirium assessments in three studies.<sup>27 32 35</sup> The average NOS quality ranking for included  
6  
7 cohort studies was seven; six studies received the maximum of nine stars. Risk of bias was  
8  
9 assessed using the CHARMS checklist<sup>15</sup> and results are shown in Figure 2. Further  
10  
11 characteristics of studies are listed in Table 1.  
12  
13  
14  
15  
16  
17  
18  
19  
20  
21  
22  
23  
24  
25  
26  
27  
28  
29  
30  
31  
32  
33  
34  
35  
36  
37  
38  
39  
40  
41  
42  
43  
44  
45  
46  
47  
48  
49  
50  
51  
52  
53  
54  
55  
56  
57  
58  
59  
60

For peer review only

| <b>Table 1</b>                              |                                                                                           |                                          |                                                                             |                                                     |                                                                                                      |
|---------------------------------------------|-------------------------------------------------------------------------------------------|------------------------------------------|-----------------------------------------------------------------------------|-----------------------------------------------------|------------------------------------------------------------------------------------------------------|
| <b>Author</b>                               | <b>Study Design<br/>Population<br/>Sample Size<br/>Sampling method<br/>Power Analysis</b> | <b>Study Grade<br/>(NOS)</b>             | <b>Outcome Variable &amp;<br/>Rate (%)</b>                                  | <b>Delirium<br/>measurement &amp;<br/>frequency</b> | <b>DPM Name &amp;<br/>Regression Model used</b>                                                      |
| Carrasco et al. (2014) <sup>23</sup>        | P.Cohort<br>Medical<br>Dev: 374<br>Val: 104<br>Consecutive                                | S: ****<br>C: -<br>O: **<br>T: 6 stars   | Delirium<br>Dev: 25 (.06)<br>Val: 12 (12)                                   | CAM<br>Every 48 h                                   | Predictive Risk Score<br>Forward stepwise                                                            |
| de Wit et al. (2016) <sup>24</sup>          | Retro<br>All hospital patients<br>Dev: 1291<br>Convenience<br>Power analysis              | S: ***<br>C: **<br>O: ***<br>T: 8 stars  | Delirium<br>Dev: 225(17)                                                    | Chart abstraction<br>EHR "diagnosis<br>table"       | Automated Delirium<br>Prediction Model<br>Multivariate                                               |
| Douglas et al.** (2013) <sup>25</sup>       | P.Cohort<br>Medical<br>Dev: 209<br>Val: 165<br>Consecutive<br>Power analysis              | S: ****<br>C: -<br>O: ***<br>T: 7 stars  | Delirium<br>Dev: 25(12)<br>Val: 14(8.5)                                     | CAM-S & CAM<br>Daily                                | Risk Stratification model<br>(AWOL)<br>Forward stepwise                                              |
| Dworkin et al. (2016) <sup>47</sup>         | P.Cohort<br>Elective noncardiac<br>surg<br>Dev: 76<br>Consecutive                         | S: ****<br>C: -<br>O: **<br>T: 6 stars   | Delirium<br>Dev: 10(13)                                                     | CAM or<br>FAM-CAM<br>1x after surgery               | Mini-Cog<br>Stratified into a five-point<br>score<br>Stepwise                                        |
| Fisher and Flowerdew (1995) <sup>26</sup>   | P.Cohort<br>Elective Orthopedic<br>Dev: 80<br>Consecutive                                 | S: **<br>C: -<br>O: **<br>T: 4 stars     | Delirium<br>Dev: 14(17.5)                                                   | CAM<br>2xDaily                                      | Prediction Model using<br>two variables.<br>Stewpsie                                                 |
| Freter et al. (2005) <sup>28</sup>          | P.Cohort<br>Elective Hip surgery<br>Dev: 132<br>Consecutive                               | S: **<br>C: **<br>O: **<br>T: 6 stars    | Delirium<br>Dev: 18(14)                                                     | CAM<br>Daily                                        | Risk Stratification Model<br>(DEAR)<br>Built from literature                                         |
| Freter et al. (2005) <sup>49</sup>          | P.Cohort<br>Hip Fx<br>Dev: 100<br>Consecutive                                             | S: **<br>C: **<br>O: **<br>T: 6 stars    | Delirium<br>Dev: 24(24)                                                     | CAM<br>Daily                                        | Risk Stratification Model<br>(DEAR)                                                                  |
| Freter et al. (2015) <sup>27</sup>          | P.Cohort<br>Hip Fracture<br>Val: 283<br>Consecutive                                       | S: ***<br>C: -<br>O: **<br>T: 5 stars    | Delirium<br>Val: 119(42)                                                    | CAM<br>POD1, 3 & 5                                  | Risk stratification model<br>(DEAR)                                                                  |
| Inouye and Charpentier (1996) <sup>29</sup> | P.Cohort<br>Medical<br>Dev: 196<br>Val: 312<br>Consecutive                                | S: ****<br>C: **<br>O: ***<br>T: 9 stars | Delirium<br>Dev: 35(18)<br>Val: 47(15)                                      | CAM<br>Every other day                              | Risk stratification model<br>based on precipitating<br>factors<br>Backwards and forwards<br>stepwise |
| Inouye et al. (2007) <sup>31</sup>          | P.Cohort<br>Medical<br>Dev: 491<br>Val: 461<br>Consecutive                                | S: ****<br>C: **<br>O: ***<br>T: 9 stars | Delirium/ subsyndrome<br>delirium at discharge<br>Dev: 58(12)<br>Val: 28(6) | CAM<br>Every other day                              | Risk stratification model<br>Log-binomial regression                                                 |
| Inouye et la. (1993) <sup>30</sup>          | P.Cohort<br>Medical<br>Dev: 107<br>Val: 174<br>Consecutive                                | S: ****<br>C: **<br>O: ***<br>T: 9 stars | Delirium<br>Dev: 27(25)<br>Val: 29(17)                                      | CAM<br>Daily                                        | Risk stratification model<br>Forward stepwise                                                        |
| Isfandyaty et al. (2012) <sup>32</sup>      | Retro<br>Medical<br>Dev: 457<br>Convenience                                               | S: **<br>C: -<br>O: ***<br>T: 5 Stars    | Delirium<br>Dev: 87(19)                                                     | Undefined<br>Daily                                  | Risk<br>stratification model<br>Cox's proportional hazard                                            |
| Kalisvaart et al. (2006) <sup>34</sup>      | P.Cohort<br>Hip Surgery &<br>Fracture<br>Val: 603<br>Consecutive                          | S: ***<br>C: -<br>O: ***<br>T: 6 stars   | Delirium<br>Dev: 74(12)                                                     | CAM, DRS-98<br>Daily through POD5                   | Externally validated<br>Inouye's '93 model.                                                          |
| Kim et al. (2016) <sup>35</sup>             | P.Cohort<br>Major General                                                                 | S: ***<br>C: **                          | Delirium<br>Dev: 112(20)                                                    | Nu-Desc<br>-every shift by RNs                      | Risk stratification model<br>Backwards stepwise                                                      |

|                                            |                                                                                    |                                          |                                            |                                                                  |                                                                                        |
|--------------------------------------------|------------------------------------------------------------------------------------|------------------------------------------|--------------------------------------------|------------------------------------------------------------------|----------------------------------------------------------------------------------------|
|                                            | Surgery<br>Dev: 561<br>Val: 533<br>Not stated<br>Power analysis                    | O: ***<br>T: 8 stars                     | Val: 99(18)                                | Confirmed with<br>CAM.                                           |                                                                                        |
| Korc-Grodzicki et al. (2014) <sup>36</sup> | Retro<br>Oncological Surgery<br>Dev: 416<br>Convenience                            | S: ***<br>C: -<br>O: ***<br>T: 6 stars   | Delirium<br>Dev: 79(19)                    | CAM<br>Daily                                                     | Comprehensive Geriatric<br>Assessment (CGA) as<br>model.<br>Stepwise                   |
| Leung et al. (2013) <sup>37</sup>          | P.Cohort<br>Noncardiac surgery<br>Dev: 581<br>Not stated                           | S: ***<br>C: -<br>O: **<br>T: 5 stars    | Delirium<br>Dev: 234(40)                   | CAM<br>Daily                                                     | Risk stratification model<br>Stepwise                                                  |
| Liang et al. (2015) <sup>38</sup>          | P.Cohort<br>Elective Orthopedic<br>Surgery<br>Dev: 461<br>Consecutive              | S: ***<br>C: **<br>O: **<br>T: 7 stars   | Delirium<br>Dev: 37(8)                     | CAM<br>Daily<br>Confirmed by<br>psychologist<br>DSM-IV           | Built 2 DPMs<br>CGA<br>Risk stratification models<br>Backward stepwise                 |
| Maekawa et al. (2015) <sup>39</sup>        | P.Cohort<br>Oncological;<br>Gastrointestinal<br>Surgery<br>Dev: 517<br>Consecutive | S: **<br>C: *<br>O: ***<br>T: 6 stars    | Delirium<br>Dev: 124(24)                   | CAM<br>Unknown frequency                                         | Comprehensive Geriatric<br>Assessment (CGA) as<br>model.<br>Proportional hazards       |
| Martinez et al. (2012) <sup>40**</sup>     | P.Cohort<br>Medical<br>Dev: 397<br>Val: 302<br>Consecutive<br>Power analysis       | S: ***<br>C: -<br>O: **<br>T: 5 stars    | Delirium<br>Dev: 52(13)<br>Val: 76(25)     | CAM<br>Undefined                                                 | Clinical prediction rule<br>Multivariate<br>Recursive partitioning                     |
| Moerman et al. (2012) <sup>41</sup>        | P.Cohort<br>Hip Fracture<br>Val: 378<br>Consecutive<br>Power analysis              | S: ***<br>C: -<br>O: ***<br>T: 6 stars   | Delirium<br>Val: 102(27)                   | Ward RN<br>observation, 3xdaily<br>Confirmed by chart<br>review. | Risk stratification model<br>(Risk Model for Delirium,<br>RD)<br>Built from literature |
| O'Keeffe and Lavan (1996) <sup>42</sup>    | P.Cohort<br>Acute Geriatric Unit<br>Dev: 100<br>Ival: 84<br>Consecutive            | S: ****<br>C: -<br>O: **<br>T: 6 stars   | Delirium<br>Dev: 28(28)<br>IVal: 25(30)    | DAS<br>Every 48 hours<br><br>DSM III                             | Risk Stratification model<br>Stepwise                                                  |
| Pendlebury et al. (2016) <sup>48</sup>     | P. Cohort<br>Medical<br>Val: 308<br>Consecutive                                    | S: ****<br>C: **<br>O: ***<br>T: 9 stars | Delirium<br>Val: 95(31)                    | CAM<br>Every 48-hours<br><br>Confirmed by DSM-<br>IV interview   | Susceptibility Score<br>Built from literature                                          |
| Pendlebury et al. (2016) <sup>33</sup>     | P.Cohort<br>Medical<br>Val: 308<br>Consecutive<br>Power analysis                   | S: ****<br>C: -<br>O: ***<br>T: 7 stars  | Delirium<br>Val: 95(31)                    | CAM<br>Every 48-hours<br><br>Confirmed by DSM-<br>IV interview   | Externally validated 4<br>DPMs                                                         |
| Pompei et al. (1994) <sup>43</sup>         | P.Cohort<br>Med/surg<br>Dev: 432<br>V: 323<br>Not stated                           | S: ****<br>C: **<br>O: ***<br>T: 9 stars | Delirium<br>Dev: 64(14.8)<br>Val: 86(26.3) | CAM<br>2xweekly.<br>Confirmed with DSM<br>III                    | Risk stratification model<br>Stepwise                                                  |
| Rudolph et al. (2009) <sup>46</sup>        | P.Cohort<br>Cardiac Surgery<br>Dev: 122<br>V: 109<br>Not stated                    | S: ***<br>C: *<br>O: **<br>T: 6 stars    | Delirium<br>Dev: 63(52)<br>Val: 48(44)     | CAM, MDAS, DSI<br>Daily                                          | Risk stratification model<br>Backward stepwise                                         |
| Rudolph et al. (2011) <sup>45</sup>        | P.Cohort<br>Medical<br>V: 100<br>Consecutive                                       | S: ****<br>C: -<br>O: ***<br>T: 7 stars  | Delirium<br>Dev: 23(23)                    | DSM-IV<br>Daily clinical<br>interview                            | Externally validated<br>Inouye's '93 model.                                            |
| Rudolph et al. (2016) <sup>44</sup>        | Dev: Retro<br>Val: P.Cohort<br>Med/surg<br>Dev: 27625<br>Val: 246                  | S: ****<br>C: -<br>O: **<br>T: 6 stars   | Delirium<br>Dev: 2343(8)<br>Val: 64(26)    | Dev: Chart audit<br>Val: DSM-IV<br>Daily clinical<br>interview   | Risk stratification model<br>Built from literature                                     |



|  |             |  |  |  |
|--|-------------|--|--|--|
|  | Consecutive |  |  |  |
|--|-------------|--|--|--|

Key:  
 \*\*=Models developed in population  $\leq 60$  years of age, but validated in population  $\geq 60$  years of age.  
Study Design: P.Cohort=Prospective Cohort, Retro=Retrospective design. Dev=Development, Val=Validation. Med=Medical, Surg=Surgical. Power analysis = reported in identified study.  
Study Grade: NOS=Newcastle Ottawa Scale. S=Selection, C=Comparability, O=Ottawa. Max 9 stars.  
Outcome Variable: Dev=Development, Val=Validation  
Delirium Measurement: CAM=Confusion Assessment Method, DSM=Diagnostic Statistical Manual, POD=Postoperative Day, MDAS=Memorial Delirium Assessment Scale, Nu-Desc=Nursing Delirium Screening Scale, DRS-98=Delirium Rating Scale, EHR=Electronic Health Record  
Type of Model: How authors designed their delirium prediction model (DPM), statistical method used  
 -Risk stratification model: Points (weighted or un-weighted) assigned per predictive risk factor present.  
 -CGA=Comprehensive Geriatric Assessment  
**-Built from Literature: Authors selected risk factors for DPM based on literature review.**

### Delirium assessment

The outcome variable was measured using the Confusion Assessment Method in twenty-one studies.<sup>23 25-31 33-40 43 46-49</sup> The frequency of delirium assessment varied from two or more assessments daily (three studies)<sup>26 35 41</sup>, to once daily (twelve studies)<sup>25 28 30 32 34 36-38 44-46 49</sup>, every-other day (eight studies)<sup>23 27 29 31 33 42 43 48</sup>, once following surgery<sup>47</sup>, and undefined (three studies).<sup>24 39 40</sup> Of the studies that assessed delirium twice or more daily, all of these studies relied on ward nurse observations or telephone interview with the nurse to identify delirium symptoms.<sup>26 35 41</sup> The principal investigator confirmed the presence of delirium following the nurse report of symptoms.<sup>26 35</sup> Twenty-one studies used trained research or clinical personnel to conduct the delirium assessments.<sup>23 25-27 29-31 33-40 43-48</sup> Three studies relied on delirium diagnosis, or keywords designated as representing delirium, to identify the outcome measure through retrospective chart review.<sup>24 32 44</sup> Three studies relied on clinical staff to recognize and chart delirium symptoms.<sup>28 41 49</sup> One of these studies retrospectively confirmed the diagnosis of delirium through consensus review of two authors, disagreement was resolved by a psychiatrist.<sup>41</sup> One study did not report details on personnel performing delirium assessments.<sup>42</sup>

### Model design and statistical methods

Various statistical techniques were employed by the twenty-three included studies. Twelve used univariate or bivariate analyses and selected variables with a pre-determined statistical value

(range for  $p < 0.05$  to  $p < 0.25$ ) for inclusion in the model.<sup>23-26 32 35-37 40 42 43 46</sup> Five of these models paired bivariate analyses with a bootstrapping technique to address lower sample and event size.<sup>24 25 37 38 46</sup> Four models based their variable selection from a literature review of risk factors for delirium.<sup>27 28 41 44 48 49</sup> Two used proportional hazards regression modeling paired with bivariate analyses and included variables with either a  $p$ -value  $< 0.25$ <sup>32</sup> or a relative risk of  $\geq 1.5$ .<sup>30</sup> Six studies published their power analysis.<sup>24 25 33 35 40 41</sup> Sixteen studies employed a form of logistic regression. Twelve of these models applied a stepwise regression approach.<sup>23 25 26 29 30 35-37 42 43 46 47</sup> Three applied a stepwise forward selection process,<sup>23 25 30</sup> two employed a stepwise backward selection process<sup>35 46</sup> and one used a combined approach.<sup>29</sup> Statistical methods used for model building are further outlined in Table 1.

Per TRIPOD reporting guidelines, validation studies were categorized into type; narrow validation refers to the same investigators subsequently collecting an additional patient cohort, following the development cohort, and broad validation refers to a validation cohort sampled from a different hospital or country.<sup>50-52</sup> As interpretation of validation studies is dependent on case-mix,<sup>53</sup> it is important to note that eight of the fourteen externally validated models are categorized as narrow validations.<sup>23 27 29-31 35 41 46</sup> Further information is outlined in Table 2.

## Variables

Figure 3 demonstrates the frequency of variable use in the fourteen externally validated delirium prediction models. Baseline cognitive impairment was the most frequently used variable. Six models defined baseline cognitive impairment as a cognitive test score at or below the level of dementia.<sup>27 30 34 43 48</sup> This cognitive test was administered upon study enrollment or extracted from past medical records.<sup>48</sup> Two studies additionally evaluated chronic cognitive impairment through family or caregiver interview with the modified Blessed Dementia Rating Scale

(mBDRS).<sup>30 31</sup> Four models combined the cognitive test score derived upon enrollment with a history of dementia to define baseline cognitive impairment.<sup>31 33 41 44</sup> History of dementia was defined as follows: Two studies-family or caregiver report supplemented with documented history in medical record<sup>33 41</sup>, one study-medical record review and interview with mBDRS<sup>31</sup>, and one study-dementia billing codes or prescription information.<sup>44</sup> One study defined baseline cognitive impairment as a pre-specified key term in the electronic health.<sup>45</sup> Table 2 details cognitive tests used in the externally validated delirium prediction models.

Functional impairment was defined as follows: (1) needing assistance with any basic ADL,<sup>27</sup> (1) domestic help, help with meals or physical care<sup>41</sup> and (2) residence in nursing facility or at home with caregivers<sup>33</sup>, (2) requiring a home care package with professional caregivers or residence in a care home.<sup>33 48</sup> The latter being obtained upon admission from medical records.<sup>33 48</sup> Two studies used validated functional assessment tools (iADL and Barthel Index) and evaluated functional status two weeks prior to hospitalization.<sup>23 31</sup>

Externally validated delirium prediction models are detailed in Table 2.

| External Validated DPM Name                     | Citation<br>Type of Validation                       | Delirium #(%)                                                                                  | Sens<br>Spec<br>PPV<br>NPV<br>(external)                                                                                                           | AUROC (95%CI)                                                                                                                                                            | Model Components                                                                                                                                                                                                                                                                                                                                                                                                                                                                                              | Cog. Assess Tool & Cutoff |      |                                  |      |                        |      |                  |      |         |      |                  |      |                 |      |                  |      |                       |
|-------------------------------------------------|------------------------------------------------------|------------------------------------------------------------------------------------------------|----------------------------------------------------------------------------------------------------------------------------------------------------|--------------------------------------------------------------------------------------------------------------------------------------------------------------------------|---------------------------------------------------------------------------------------------------------------------------------------------------------------------------------------------------------------------------------------------------------------------------------------------------------------------------------------------------------------------------------------------------------------------------------------------------------------------------------------------------------------|---------------------------|------|----------------------------------|------|------------------------|------|------------------|------|---------|------|------------------|------|-----------------|------|------------------|------|-----------------------|
| <b>AWOL Tool</b>                                | Pendlebury et al. (2016) <sup>33</sup><br>Broad_val_ | 1st Val: 14(9)<br>2 <sup>nd</sup> Val: 95(31)<br>(any delirium)<br>67-prevalent<br>28-incident | Mod. AWOL<br>Cutoff - 3<br>Any Delirium<br>Sens .7<br>Spec .66<br>PPV .55<br>NPV .79<br>Incident Del<br>Sens .76<br>Spec .66<br>PPV .27<br>NPV .94 | 1 <sup>st</sup> Val:<br>0.69<br>(0.54-0.83)<br>Incident delirium<br>2 <sup>nd</sup> Val:<br>Cohort (MMSE)<br>0.78<br>(0.68-0.88)<br>Cohort (AMTS)<br>0.73<br>(0.63-0.83) | Original AWOL Tool<br><table border="1"> <tr><td>Age &gt;80</td><td>1 pt</td></tr> <tr><td>Failure to spell WORLD backwards</td><td>1 pt</td></tr> <tr><td>Disorientation</td><td>1 pt</td></tr> <tr><td>Illness Severity</td><td>1 pt</td></tr> </table><br>Modified AWOL Tool<br><table border="1"> <tr><td>Age &gt;80</td><td>1 pt</td></tr> <tr><td>Diag of Dementia</td><td>1 pt</td></tr> <tr><td>MMSE&lt;24, AMTS&lt;9</td><td>1 pt</td></tr> <tr><td>Illness severity</td><td>1 pt</td></tr> </table> | Age >80                   | 1 pt | Failure to spell WORLD backwards | 1 pt | Disorientation         | 1 pt | Illness Severity | 1 pt | Age >80 | 1 pt | Diag of Dementia | 1 pt | MMSE<24, AMTS<9 | 1 pt | Illness severity | 1 pt | MMSE < 24<br>AMTS < 9 |
| Age >80                                         | 1 pt                                                 |                                                                                                |                                                                                                                                                    |                                                                                                                                                                          |                                                                                                                                                                                                                                                                                                                                                                                                                                                                                                               |                           |      |                                  |      |                        |      |                  |      |         |      |                  |      |                 |      |                  |      |                       |
| Failure to spell WORLD backwards                | 1 pt                                                 |                                                                                                |                                                                                                                                                    |                                                                                                                                                                          |                                                                                                                                                                                                                                                                                                                                                                                                                                                                                                               |                           |      |                                  |      |                        |      |                  |      |         |      |                  |      |                 |      |                  |      |                       |
| Disorientation                                  | 1 pt                                                 |                                                                                                |                                                                                                                                                    |                                                                                                                                                                          |                                                                                                                                                                                                                                                                                                                                                                                                                                                                                                               |                           |      |                                  |      |                        |      |                  |      |         |      |                  |      |                 |      |                  |      |                       |
| Illness Severity                                | 1 pt                                                 |                                                                                                |                                                                                                                                                    |                                                                                                                                                                          |                                                                                                                                                                                                                                                                                                                                                                                                                                                                                                               |                           |      |                                  |      |                        |      |                  |      |         |      |                  |      |                 |      |                  |      |                       |
| Age >80                                         | 1 pt                                                 |                                                                                                |                                                                                                                                                    |                                                                                                                                                                          |                                                                                                                                                                                                                                                                                                                                                                                                                                                                                                               |                           |      |                                  |      |                        |      |                  |      |         |      |                  |      |                 |      |                  |      |                       |
| Diag of Dementia                                | 1 pt                                                 |                                                                                                |                                                                                                                                                    |                                                                                                                                                                          |                                                                                                                                                                                                                                                                                                                                                                                                                                                                                                               |                           |      |                                  |      |                        |      |                  |      |         |      |                  |      |                 |      |                  |      |                       |
| MMSE<24, AMTS<9                                 | 1 pt                                                 |                                                                                                |                                                                                                                                                    |                                                                                                                                                                          |                                                                                                                                                                                                                                                                                                                                                                                                                                                                                                               |                           |      |                                  |      |                        |      |                  |      |         |      |                  |      |                 |      |                  |      |                       |
| Illness severity                                | 1 pt                                                 |                                                                                                |                                                                                                                                                    |                                                                                                                                                                          |                                                                                                                                                                                                                                                                                                                                                                                                                                                                                                               |                           |      |                                  |      |                        |      |                  |      |         |      |                  |      |                 |      |                  |      |                       |
| <b>Clinical Prediction Rule-Cardiac Surgery</b> | Rudolph et al. (2009) <sup>46</sup>                  | Dev: 63(52)<br>Val: 48(44)                                                                     | Not reported                                                                                                                                       | Dev: 0.74<br>Val: 0.75<br>Did not report                                                                                                                                 | Weighted Points-Regression<br><table border="1"> <tr><td>MMSE ≤ 23</td><td>2 pt</td></tr> <tr><td>MMSE 24-27</td><td>1 pt</td></tr> </table>                                                                                                                                                                                                                                                                                                                                                                  | MMSE ≤ 23                 | 2 pt | MMSE 24-27                       | 1 pt | MMSE -Stratified score |      |                  |      |         |      |                  |      |                 |      |                  |      |                       |
| MMSE ≤ 23                                       | 2 pt                                                 |                                                                                                |                                                                                                                                                    |                                                                                                                                                                          |                                                                                                                                                                                                                                                                                                                                                                                                                                                                                                               |                           |      |                                  |      |                        |      |                  |      |         |      |                  |      |                 |      |                  |      |                       |
| MMSE 24-27                                      | 1 pt                                                 |                                                                                                |                                                                                                                                                    |                                                                                                                                                                          |                                                                                                                                                                                                                                                                                                                                                                                                                                                                                                               |                           |      |                                  |      |                        |      |                  |      |         |      |                  |      |                 |      |                  |      |                       |

|                                               |                                                         |                                                                               |                                                                                                                  |                                                                                                    |                                                                                                                                                                                                                                                                                                                                                                                                                                                                                                                                                                                                                                                                                                                                                                                                                                                                                                |                                                                                        |      |                                 |      |                    |      |                |      |                       |      |                               |      |                       |   |            |  |    |   |     |   |                    |  |    |   |     |   |                     |  |    |   |     |   |                   |  |    |   |     |   |              |  |    |   |                                                                    |
|-----------------------------------------------|---------------------------------------------------------|-------------------------------------------------------------------------------|------------------------------------------------------------------------------------------------------------------|----------------------------------------------------------------------------------------------------|------------------------------------------------------------------------------------------------------------------------------------------------------------------------------------------------------------------------------------------------------------------------------------------------------------------------------------------------------------------------------------------------------------------------------------------------------------------------------------------------------------------------------------------------------------------------------------------------------------------------------------------------------------------------------------------------------------------------------------------------------------------------------------------------------------------------------------------------------------------------------------------------|----------------------------------------------------------------------------------------|------|---------------------------------|------|--------------------|------|----------------|------|-----------------------|------|-------------------------------|------|-----------------------|---|------------|--|----|---|-----|---|--------------------|--|----|---|-----|---|---------------------|--|----|---|-----|---|-------------------|--|----|---|-----|---|--------------|--|----|---|--------------------------------------------------------------------|
|                                               | Narrow val.                                             | (incident delirium)                                                           |                                                                                                                  | CI                                                                                                 | <table border="1"> <tr> <td>Hx of Stroke/TIA</td> <td>1 pt</td> </tr> <tr> <td>GDS &gt;4</td> <td>1 pt</td> </tr> <tr> <td>Abnormal Albumin</td> <td>1 pt</td> </tr> </table> <p>Stratified into point categories<br/>                     0 pt<br/>                     1 pt<br/>                     2 pts<br/>                     ≥ 3 pts – High risk group<br/>                     RR in High risk group: 4.9 (3.8-6.2)</p>                                                                                                                                                                                                                                                                                                                                                                                                                                                              | Hx of Stroke/TIA                                                                       | 1 pt | GDS >4                          | 1 pt | Abnormal Albumin   | 1 pt |                |      |                       |      |                               |      |                       |   |            |  |    |   |     |   |                    |  |    |   |     |   |                     |  |    |   |     |   |                   |  |    |   |     |   |              |  |    |   |                                                                    |
| Hx of Stroke/TIA                              | 1 pt                                                    |                                                                               |                                                                                                                  |                                                                                                    |                                                                                                                                                                                                                                                                                                                                                                                                                                                                                                                                                                                                                                                                                                                                                                                                                                                                                                |                                                                                        |      |                                 |      |                    |      |                |      |                       |      |                               |      |                       |   |            |  |    |   |     |   |                    |  |    |   |     |   |                     |  |    |   |     |   |                   |  |    |   |     |   |              |  |    |   |                                                                    |
| GDS >4                                        | 1 pt                                                    |                                                                               |                                                                                                                  |                                                                                                    |                                                                                                                                                                                                                                                                                                                                                                                                                                                                                                                                                                                                                                                                                                                                                                                                                                                                                                |                                                                                        |      |                                 |      |                    |      |                |      |                       |      |                               |      |                       |   |            |  |    |   |     |   |                    |  |    |   |     |   |                     |  |    |   |     |   |                   |  |    |   |     |   |              |  |    |   |                                                                    |
| Abnormal Albumin                              | 1 pt                                                    |                                                                               |                                                                                                                  |                                                                                                    |                                                                                                                                                                                                                                                                                                                                                                                                                                                                                                                                                                                                                                                                                                                                                                                                                                                                                                |                                                                                        |      |                                 |      |                    |      |                |      |                       |      |                               |      |                       |   |            |  |    |   |     |   |                    |  |    |   |     |   |                     |  |    |   |     |   |                   |  |    |   |     |   |              |  |    |   |                                                                    |
| <b>DEAR</b>                                   | Freter et al. (2015) <sup>27</sup><br><br>Narrow val.   | Dev: (2005) 18(14)<br><br>Val: (2015) Pre-Op= 163(58)<br><br>Post-op= 118(42) | Sens .68<br>Spec .73<br>PPV .65<br>NPV .76<br><br>Optimal cut-off score: 3pts<br><br>(Incident post-op delirium) | Dev: (2005) 0-77 (0-64-0-87)<br><br>Val: (2015) AUROC Not published                                | <table border="1"> <tr> <td>MMSE ≤ 23</td> <td>1 pt</td> </tr> <tr> <td>Functional dependence</td> <td>1 pt</td> </tr> <tr> <td>Sensory impairment</td> <td>1 pt</td> </tr> <tr> <td>Substance use</td> <td>1 pt</td> </tr> <tr> <td>Age &gt;80</td> <td>1 pt</td> </tr> </table> <p>Not weighted.<br/>                     0-5 Score, cut-off of 3 indicating high risk.</p>                                                                                                                                                                                                                                                                                                                                                                                                                                                                                                                  | MMSE ≤ 23                                                                              | 1 pt | Functional dependence           | 1 pt | Sensory impairment | 1 pt | Substance use  | 1 pt | Age >80               | 1 pt | MMSE<br>Cut-off ≤ 23          |      |                       |   |            |  |    |   |     |   |                    |  |    |   |     |   |                     |  |    |   |     |   |                   |  |    |   |     |   |              |  |    |   |                                                                    |
| MMSE ≤ 23                                     | 1 pt                                                    |                                                                               |                                                                                                                  |                                                                                                    |                                                                                                                                                                                                                                                                                                                                                                                                                                                                                                                                                                                                                                                                                                                                                                                                                                                                                                |                                                                                        |      |                                 |      |                    |      |                |      |                       |      |                               |      |                       |   |            |  |    |   |     |   |                    |  |    |   |     |   |                     |  |    |   |     |   |                   |  |    |   |     |   |              |  |    |   |                                                                    |
| Functional dependence                         | 1 pt                                                    |                                                                               |                                                                                                                  |                                                                                                    |                                                                                                                                                                                                                                                                                                                                                                                                                                                                                                                                                                                                                                                                                                                                                                                                                                                                                                |                                                                                        |      |                                 |      |                    |      |                |      |                       |      |                               |      |                       |   |            |  |    |   |     |   |                    |  |    |   |     |   |                     |  |    |   |     |   |                   |  |    |   |     |   |              |  |    |   |                                                                    |
| Sensory impairment                            | 1 pt                                                    |                                                                               |                                                                                                                  |                                                                                                    |                                                                                                                                                                                                                                                                                                                                                                                                                                                                                                                                                                                                                                                                                                                                                                                                                                                                                                |                                                                                        |      |                                 |      |                    |      |                |      |                       |      |                               |      |                       |   |            |  |    |   |     |   |                    |  |    |   |     |   |                     |  |    |   |     |   |                   |  |    |   |     |   |              |  |    |   |                                                                    |
| Substance use                                 | 1 pt                                                    |                                                                               |                                                                                                                  |                                                                                                    |                                                                                                                                                                                                                                                                                                                                                                                                                                                                                                                                                                                                                                                                                                                                                                                                                                                                                                |                                                                                        |      |                                 |      |                    |      |                |      |                       |      |                               |      |                       |   |            |  |    |   |     |   |                    |  |    |   |     |   |                     |  |    |   |     |   |                   |  |    |   |     |   |              |  |    |   |                                                                    |
| Age >80                                       | 1 pt                                                    |                                                                               |                                                                                                                  |                                                                                                    |                                                                                                                                                                                                                                                                                                                                                                                                                                                                                                                                                                                                                                                                                                                                                                                                                                                                                                |                                                                                        |      |                                 |      |                    |      |                |      |                       |      |                               |      |                       |   |            |  |    |   |     |   |                    |  |    |   |     |   |                     |  |    |   |     |   |                   |  |    |   |     |   |              |  |    |   |                                                                    |
| <b>Delirium at Discharge Prediction Model</b> | Inouye et al. (2007) <sup>31</sup><br><br>Narrow val.   | Dev: 58(12)<br>Val: 28(6)<br><br>(incident delirium)                          | Not reported                                                                                                     | Dev: 0.80<br>Val: 0.75<br><br>Did not report CI<br><br>Calibration: $\chi^2$ trend-<br>$p < 0.001$ | <table border="1"> <tr> <td>Delirium at Discharge Prediction</td> <td></td> </tr> <tr> <td>Dementia diagnosis or mBDRS ≥ 4</td> <td>1 pt</td> </tr> <tr> <td>Vision Impairment</td> <td>1 pt</td> </tr> <tr> <td>ADL Impairment</td> <td>1 pt</td> </tr> <tr> <td>Charlson Score</td> <td>1 pt</td> </tr> <tr> <td>Restraint use during delirium</td> <td>1 pt</td> </tr> </table> <p>Not weighted.<br/>                     0-1 pt = Low Risk<br/>                     2-3 pt = Intermediate Risk<br/>                     4-5 pt = High Risk<br/><br/>                     RR in High risk group: 10.2(3.2-32.7)</p>                                                                                                                                                                                                                                                                         | Delirium at Discharge Prediction                                                       |      | Dementia diagnosis or mBDRS ≥ 4 | 1 pt | Vision Impairment  | 1 pt | ADL Impairment | 1 pt | Charlson Score        | 1 pt | Restraint use during delirium | 1 pt | MMSE < 24<br>mBDR ≥ 4 |   |            |  |    |   |     |   |                    |  |    |   |     |   |                     |  |    |   |     |   |                   |  |    |   |     |   |              |  |    |   |                                                                    |
| Delirium at Discharge Prediction              |                                                         |                                                                               |                                                                                                                  |                                                                                                    |                                                                                                                                                                                                                                                                                                                                                                                                                                                                                                                                                                                                                                                                                                                                                                                                                                                                                                |                                                                                        |      |                                 |      |                    |      |                |      |                       |      |                               |      |                       |   |            |  |    |   |     |   |                    |  |    |   |     |   |                     |  |    |   |     |   |                   |  |    |   |     |   |              |  |    |   |                                                                    |
| Dementia diagnosis or mBDRS ≥ 4               | 1 pt                                                    |                                                                               |                                                                                                                  |                                                                                                    |                                                                                                                                                                                                                                                                                                                                                                                                                                                                                                                                                                                                                                                                                                                                                                                                                                                                                                |                                                                                        |      |                                 |      |                    |      |                |      |                       |      |                               |      |                       |   |            |  |    |   |     |   |                    |  |    |   |     |   |                     |  |    |   |     |   |                   |  |    |   |     |   |              |  |    |   |                                                                    |
| Vision Impairment                             | 1 pt                                                    |                                                                               |                                                                                                                  |                                                                                                    |                                                                                                                                                                                                                                                                                                                                                                                                                                                                                                                                                                                                                                                                                                                                                                                                                                                                                                |                                                                                        |      |                                 |      |                    |      |                |      |                       |      |                               |      |                       |   |            |  |    |   |     |   |                    |  |    |   |     |   |                     |  |    |   |     |   |                   |  |    |   |     |   |              |  |    |   |                                                                    |
| ADL Impairment                                | 1 pt                                                    |                                                                               |                                                                                                                  |                                                                                                    |                                                                                                                                                                                                                                                                                                                                                                                                                                                                                                                                                                                                                                                                                                                                                                                                                                                                                                |                                                                                        |      |                                 |      |                    |      |                |      |                       |      |                               |      |                       |   |            |  |    |   |     |   |                    |  |    |   |     |   |                     |  |    |   |     |   |                   |  |    |   |     |   |              |  |    |   |                                                                    |
| Charlson Score                                | 1 pt                                                    |                                                                               |                                                                                                                  |                                                                                                    |                                                                                                                                                                                                                                                                                                                                                                                                                                                                                                                                                                                                                                                                                                                                                                                                                                                                                                |                                                                                        |      |                                 |      |                    |      |                |      |                       |      |                               |      |                       |   |            |  |    |   |     |   |                    |  |    |   |     |   |                     |  |    |   |     |   |                   |  |    |   |     |   |              |  |    |   |                                                                    |
| Restraint use during delirium                 | 1 pt                                                    |                                                                               |                                                                                                                  |                                                                                                    |                                                                                                                                                                                                                                                                                                                                                                                                                                                                                                                                                                                                                                                                                                                                                                                                                                                                                                |                                                                                        |      |                                 |      |                    |      |                |      |                       |      |                               |      |                       |   |            |  |    |   |     |   |                    |  |    |   |     |   |                     |  |    |   |     |   |                   |  |    |   |     |   |              |  |    |   |                                                                    |
| <b>Delirium Prediction Score (DPS)</b>        | Carrasco et al. (2014) <sup>23</sup><br><br>Narrow val. | Dev: 25(.06)<br>Val: 12(12)<br><br>(incident delirium)                        | Sens .88<br>Spec .74<br>PPV .22<br>NPV .99                                                                       | Dev: 0.86 (0.82-0.91)<br><br>Val: 0.78 (0.66-0.90)                                                 | DPS=[5x(BUN/Cr ratio)]-(3xBarthel Index).<br>Cut off is:<br>> -240 = High risk for Delirium<br>In conventional units, cut-off is:<br>> -160 = High Risk for Delirium                                                                                                                                                                                                                                                                                                                                                                                                                                                                                                                                                                                                                                                                                                                           | None.<br><br>Pfeffer Functional Activities Questionnaire as a proxy for prior dementia |      |                                 |      |                    |      |                |      |                       |      |                               |      |                       |   |            |  |    |   |     |   |                    |  |    |   |     |   |                     |  |    |   |     |   |                   |  |    |   |     |   |              |  |    |   |                                                                    |
| <b>Delphi Score</b>                           | Kim et al. (2016) <sup>35</sup><br><br>Narrow val.      | Dev: 112(20)<br>Val: 99(18)<br><br>(incident delirium)                        | Sens .81<br>Spec .93<br>PPV .70<br>NPV .96<br><br>Optimal cut-off score: 6.5pts                                  | Dev: 0.911 (0.88-0.94)<br><br>Val: 0.938 (0.91-0.97)                                               | <table border="1"> <tr> <td>Age (years)</td> <td></td> </tr> <tr> <td>60-69</td> <td>0</td> </tr> <tr> <td>70-79</td> <td>1</td> </tr> <tr> <td>≥80</td> <td>2</td> </tr> <tr> <td>Low Physical Activity</td> <td></td> </tr> <tr> <td>Self-sufficient</td> <td>0</td> </tr> <tr> <td>Need assist.</td> <td>2</td> </tr> <tr> <td>Heavy ETOH</td> <td></td> </tr> <tr> <td>No</td> <td>0</td> </tr> <tr> <td>Yes</td> <td>1</td> </tr> <tr> <td>Hearing Impairment</td> <td></td> </tr> <tr> <td>No</td> <td>0</td> </tr> <tr> <td>Yes</td> <td>1</td> </tr> <tr> <td>History of delirium</td> <td></td> </tr> <tr> <td>No</td> <td>0</td> </tr> <tr> <td>Yes</td> <td>2</td> </tr> <tr> <td>Emergency Surgery</td> <td></td> </tr> <tr> <td>No</td> <td>0</td> </tr> <tr> <td>Yes</td> <td>1</td> </tr> <tr> <td>Open Surgery</td> <td></td> </tr> <tr> <td>No</td> <td>0</td> </tr> </table> | Age (years)                                                                            |      | 60-69                           | 0    | 70-79              | 1    | ≥80            | 2    | Low Physical Activity |      | Self-sufficient               | 0    | Need assist.          | 2 | Heavy ETOH |  | No | 0 | Yes | 1 | Hearing Impairment |  | No | 0 | Yes | 1 | History of delirium |  | No | 0 | Yes | 2 | Emergency Surgery |  | No | 0 | Yes | 1 | Open Surgery |  | No | 0 | No measure of cognition.<br><br>Excluded participants if MMSE < 24 |
| Age (years)                                   |                                                         |                                                                               |                                                                                                                  |                                                                                                    |                                                                                                                                                                                                                                                                                                                                                                                                                                                                                                                                                                                                                                                                                                                                                                                                                                                                                                |                                                                                        |      |                                 |      |                    |      |                |      |                       |      |                               |      |                       |   |            |  |    |   |     |   |                    |  |    |   |     |   |                     |  |    |   |     |   |                   |  |    |   |     |   |              |  |    |   |                                                                    |
| 60-69                                         | 0                                                       |                                                                               |                                                                                                                  |                                                                                                    |                                                                                                                                                                                                                                                                                                                                                                                                                                                                                                                                                                                                                                                                                                                                                                                                                                                                                                |                                                                                        |      |                                 |      |                    |      |                |      |                       |      |                               |      |                       |   |            |  |    |   |     |   |                    |  |    |   |     |   |                     |  |    |   |     |   |                   |  |    |   |     |   |              |  |    |   |                                                                    |
| 70-79                                         | 1                                                       |                                                                               |                                                                                                                  |                                                                                                    |                                                                                                                                                                                                                                                                                                                                                                                                                                                                                                                                                                                                                                                                                                                                                                                                                                                                                                |                                                                                        |      |                                 |      |                    |      |                |      |                       |      |                               |      |                       |   |            |  |    |   |     |   |                    |  |    |   |     |   |                     |  |    |   |     |   |                   |  |    |   |     |   |              |  |    |   |                                                                    |
| ≥80                                           | 2                                                       |                                                                               |                                                                                                                  |                                                                                                    |                                                                                                                                                                                                                                                                                                                                                                                                                                                                                                                                                                                                                                                                                                                                                                                                                                                                                                |                                                                                        |      |                                 |      |                    |      |                |      |                       |      |                               |      |                       |   |            |  |    |   |     |   |                    |  |    |   |     |   |                     |  |    |   |     |   |                   |  |    |   |     |   |              |  |    |   |                                                                    |
| Low Physical Activity                         |                                                         |                                                                               |                                                                                                                  |                                                                                                    |                                                                                                                                                                                                                                                                                                                                                                                                                                                                                                                                                                                                                                                                                                                                                                                                                                                                                                |                                                                                        |      |                                 |      |                    |      |                |      |                       |      |                               |      |                       |   |            |  |    |   |     |   |                    |  |    |   |     |   |                     |  |    |   |     |   |                   |  |    |   |     |   |              |  |    |   |                                                                    |
| Self-sufficient                               | 0                                                       |                                                                               |                                                                                                                  |                                                                                                    |                                                                                                                                                                                                                                                                                                                                                                                                                                                                                                                                                                                                                                                                                                                                                                                                                                                                                                |                                                                                        |      |                                 |      |                    |      |                |      |                       |      |                               |      |                       |   |            |  |    |   |     |   |                    |  |    |   |     |   |                     |  |    |   |     |   |                   |  |    |   |     |   |              |  |    |   |                                                                    |
| Need assist.                                  | 2                                                       |                                                                               |                                                                                                                  |                                                                                                    |                                                                                                                                                                                                                                                                                                                                                                                                                                                                                                                                                                                                                                                                                                                                                                                                                                                                                                |                                                                                        |      |                                 |      |                    |      |                |      |                       |      |                               |      |                       |   |            |  |    |   |     |   |                    |  |    |   |     |   |                     |  |    |   |     |   |                   |  |    |   |     |   |              |  |    |   |                                                                    |
| Heavy ETOH                                    |                                                         |                                                                               |                                                                                                                  |                                                                                                    |                                                                                                                                                                                                                                                                                                                                                                                                                                                                                                                                                                                                                                                                                                                                                                                                                                                                                                |                                                                                        |      |                                 |      |                    |      |                |      |                       |      |                               |      |                       |   |            |  |    |   |     |   |                    |  |    |   |     |   |                     |  |    |   |     |   |                   |  |    |   |     |   |              |  |    |   |                                                                    |
| No                                            | 0                                                       |                                                                               |                                                                                                                  |                                                                                                    |                                                                                                                                                                                                                                                                                                                                                                                                                                                                                                                                                                                                                                                                                                                                                                                                                                                                                                |                                                                                        |      |                                 |      |                    |      |                |      |                       |      |                               |      |                       |   |            |  |    |   |     |   |                    |  |    |   |     |   |                     |  |    |   |     |   |                   |  |    |   |     |   |              |  |    |   |                                                                    |
| Yes                                           | 1                                                       |                                                                               |                                                                                                                  |                                                                                                    |                                                                                                                                                                                                                                                                                                                                                                                                                                                                                                                                                                                                                                                                                                                                                                                                                                                                                                |                                                                                        |      |                                 |      |                    |      |                |      |                       |      |                               |      |                       |   |            |  |    |   |     |   |                    |  |    |   |     |   |                     |  |    |   |     |   |                   |  |    |   |     |   |              |  |    |   |                                                                    |
| Hearing Impairment                            |                                                         |                                                                               |                                                                                                                  |                                                                                                    |                                                                                                                                                                                                                                                                                                                                                                                                                                                                                                                                                                                                                                                                                                                                                                                                                                                                                                |                                                                                        |      |                                 |      |                    |      |                |      |                       |      |                               |      |                       |   |            |  |    |   |     |   |                    |  |    |   |     |   |                     |  |    |   |     |   |                   |  |    |   |     |   |              |  |    |   |                                                                    |
| No                                            | 0                                                       |                                                                               |                                                                                                                  |                                                                                                    |                                                                                                                                                                                                                                                                                                                                                                                                                                                                                                                                                                                                                                                                                                                                                                                                                                                                                                |                                                                                        |      |                                 |      |                    |      |                |      |                       |      |                               |      |                       |   |            |  |    |   |     |   |                    |  |    |   |     |   |                     |  |    |   |     |   |                   |  |    |   |     |   |              |  |    |   |                                                                    |
| Yes                                           | 1                                                       |                                                                               |                                                                                                                  |                                                                                                    |                                                                                                                                                                                                                                                                                                                                                                                                                                                                                                                                                                                                                                                                                                                                                                                                                                                                                                |                                                                                        |      |                                 |      |                    |      |                |      |                       |      |                               |      |                       |   |            |  |    |   |     |   |                    |  |    |   |     |   |                     |  |    |   |     |   |                   |  |    |   |     |   |              |  |    |   |                                                                    |
| History of delirium                           |                                                         |                                                                               |                                                                                                                  |                                                                                                    |                                                                                                                                                                                                                                                                                                                                                                                                                                                                                                                                                                                                                                                                                                                                                                                                                                                                                                |                                                                                        |      |                                 |      |                    |      |                |      |                       |      |                               |      |                       |   |            |  |    |   |     |   |                    |  |    |   |     |   |                     |  |    |   |     |   |                   |  |    |   |     |   |              |  |    |   |                                                                    |
| No                                            | 0                                                       |                                                                               |                                                                                                                  |                                                                                                    |                                                                                                                                                                                                                                                                                                                                                                                                                                                                                                                                                                                                                                                                                                                                                                                                                                                                                                |                                                                                        |      |                                 |      |                    |      |                |      |                       |      |                               |      |                       |   |            |  |    |   |     |   |                    |  |    |   |     |   |                     |  |    |   |     |   |                   |  |    |   |     |   |              |  |    |   |                                                                    |
| Yes                                           | 2                                                       |                                                                               |                                                                                                                  |                                                                                                    |                                                                                                                                                                                                                                                                                                                                                                                                                                                                                                                                                                                                                                                                                                                                                                                                                                                                                                |                                                                                        |      |                                 |      |                    |      |                |      |                       |      |                               |      |                       |   |            |  |    |   |     |   |                    |  |    |   |     |   |                     |  |    |   |     |   |                   |  |    |   |     |   |              |  |    |   |                                                                    |
| Emergency Surgery                             |                                                         |                                                                               |                                                                                                                  |                                                                                                    |                                                                                                                                                                                                                                                                                                                                                                                                                                                                                                                                                                                                                                                                                                                                                                                                                                                                                                |                                                                                        |      |                                 |      |                    |      |                |      |                       |      |                               |      |                       |   |            |  |    |   |     |   |                    |  |    |   |     |   |                     |  |    |   |     |   |                   |  |    |   |     |   |              |  |    |   |                                                                    |
| No                                            | 0                                                       |                                                                               |                                                                                                                  |                                                                                                    |                                                                                                                                                                                                                                                                                                                                                                                                                                                                                                                                                                                                                                                                                                                                                                                                                                                                                                |                                                                                        |      |                                 |      |                    |      |                |      |                       |      |                               |      |                       |   |            |  |    |   |     |   |                    |  |    |   |     |   |                     |  |    |   |     |   |                   |  |    |   |     |   |              |  |    |   |                                                                    |
| Yes                                           | 1                                                       |                                                                               |                                                                                                                  |                                                                                                    |                                                                                                                                                                                                                                                                                                                                                                                                                                                                                                                                                                                                                                                                                                                                                                                                                                                                                                |                                                                                        |      |                                 |      |                    |      |                |      |                       |      |                               |      |                       |   |            |  |    |   |     |   |                    |  |    |   |     |   |                     |  |    |   |     |   |                   |  |    |   |     |   |              |  |    |   |                                                                    |
| Open Surgery                                  |                                                         |                                                                               |                                                                                                                  |                                                                                                    |                                                                                                                                                                                                                                                                                                                                                                                                                                                                                                                                                                                                                                                                                                                                                                                                                                                                                                |                                                                                        |      |                                 |      |                    |      |                |      |                       |      |                               |      |                       |   |            |  |    |   |     |   |                    |  |    |   |     |   |                     |  |    |   |     |   |                   |  |    |   |     |   |              |  |    |   |                                                                    |
| No                                            | 0                                                       |                                                                               |                                                                                                                  |                                                                                                    |                                                                                                                                                                                                                                                                                                                                                                                                                                                                                                                                                                                                                                                                                                                                                                                                                                                                                                |                                                                                        |      |                                 |      |                    |      |                |      |                       |      |                               |      |                       |   |            |  |    |   |     |   |                    |  |    |   |     |   |                     |  |    |   |     |   |                   |  |    |   |     |   |              |  |    |   |                                                                    |

|                                                             |                                           |                                                                                                                                                                                                                                                                                                                                                                                                                                                                                                                                                                                                                                                                                                                                                 |                             |                                                                                     |                                                                                                                                                                                                                                                                                                                                                                                                                                      | <table border="1"> <tr><td>Yes</td><td>2</td></tr> <tr><td colspan="2">ICU Admission</td></tr> <tr><td>No</td><td>0</td></tr> <tr><td>Yes</td><td>3</td></tr> <tr><td colspan="2">Pre-Op CRP (mg/dL)</td></tr> <tr><td>&lt;10</td><td>0</td></tr> <tr><td>≥10</td><td>1</td></tr> </table> <p>Max points: 15<br/>Optimal cut-off: 6.5<br/>High Risk: ≥7 points</p> | Yes  | 2                 | ICU Admission |                                                             | No   | 0                 | Yes                | 3                                                                                                  | Pre-Op CRP (mg/dL) |  | <10 | 0        | ≥10  | 1           |     |     |       |      |             |     |     |      |      |             |     |     |      |      |             |     |     |  |  |                                                                                                                                                                                                                                                                                                                                                                                                                                                                                                          |            |      |                                 |  |            |      |            |      |           |      |          |      |        |      |                |      |                                                                                                                                                                                                     |
|-------------------------------------------------------------|-------------------------------------------|-------------------------------------------------------------------------------------------------------------------------------------------------------------------------------------------------------------------------------------------------------------------------------------------------------------------------------------------------------------------------------------------------------------------------------------------------------------------------------------------------------------------------------------------------------------------------------------------------------------------------------------------------------------------------------------------------------------------------------------------------|-----------------------------|-------------------------------------------------------------------------------------|--------------------------------------------------------------------------------------------------------------------------------------------------------------------------------------------------------------------------------------------------------------------------------------------------------------------------------------------------------------------------------------------------------------------------------------|--------------------------------------------------------------------------------------------------------------------------------------------------------------------------------------------------------------------------------------------------------------------------------------------------------------------------------------------------------------------|------|-------------------|---------------|-------------------------------------------------------------|------|-------------------|--------------------|----------------------------------------------------------------------------------------------------|--------------------|--|-----|----------|------|-------------|-----|-----|-------|------|-------------|-----|-----|------|------|-------------|-----|-----|------|------|-------------|-----|-----|--|--|----------------------------------------------------------------------------------------------------------------------------------------------------------------------------------------------------------------------------------------------------------------------------------------------------------------------------------------------------------------------------------------------------------------------------------------------------------------------------------------------------------|------------|------|---------------------------------|--|------------|------|------------|------|-----------|------|----------|------|--------|------|----------------|------|-----------------------------------------------------------------------------------------------------------------------------------------------------------------------------------------------------|
| Yes                                                         | 2                                         |                                                                                                                                                                                                                                                                                                                                                                                                                                                                                                                                                                                                                                                                                                                                                 |                             |                                                                                     |                                                                                                                                                                                                                                                                                                                                                                                                                                      |                                                                                                                                                                                                                                                                                                                                                                    |      |                   |               |                                                             |      |                   |                    |                                                                                                    |                    |  |     |          |      |             |     |     |       |      |             |     |     |      |      |             |     |     |      |      |             |     |     |  |  |                                                                                                                                                                                                                                                                                                                                                                                                                                                                                                          |            |      |                                 |  |            |      |            |      |           |      |          |      |        |      |                |      |                                                                                                                                                                                                     |
| ICU Admission                                               |                                           |                                                                                                                                                                                                                                                                                                                                                                                                                                                                                                                                                                                                                                                                                                                                                 |                             |                                                                                     |                                                                                                                                                                                                                                                                                                                                                                                                                                      |                                                                                                                                                                                                                                                                                                                                                                    |      |                   |               |                                                             |      |                   |                    |                                                                                                    |                    |  |     |          |      |             |     |     |       |      |             |     |     |      |      |             |     |     |      |      |             |     |     |  |  |                                                                                                                                                                                                                                                                                                                                                                                                                                                                                                          |            |      |                                 |  |            |      |            |      |           |      |          |      |        |      |                |      |                                                                                                                                                                                                     |
| No                                                          | 0                                         |                                                                                                                                                                                                                                                                                                                                                                                                                                                                                                                                                                                                                                                                                                                                                 |                             |                                                                                     |                                                                                                                                                                                                                                                                                                                                                                                                                                      |                                                                                                                                                                                                                                                                                                                                                                    |      |                   |               |                                                             |      |                   |                    |                                                                                                    |                    |  |     |          |      |             |     |     |       |      |             |     |     |      |      |             |     |     |      |      |             |     |     |  |  |                                                                                                                                                                                                                                                                                                                                                                                                                                                                                                          |            |      |                                 |  |            |      |            |      |           |      |          |      |        |      |                |      |                                                                                                                                                                                                     |
| Yes                                                         | 3                                         |                                                                                                                                                                                                                                                                                                                                                                                                                                                                                                                                                                                                                                                                                                                                                 |                             |                                                                                     |                                                                                                                                                                                                                                                                                                                                                                                                                                      |                                                                                                                                                                                                                                                                                                                                                                    |      |                   |               |                                                             |      |                   |                    |                                                                                                    |                    |  |     |          |      |             |     |     |       |      |             |     |     |      |      |             |     |     |      |      |             |     |     |  |  |                                                                                                                                                                                                                                                                                                                                                                                                                                                                                                          |            |      |                                 |  |            |      |            |      |           |      |          |      |        |      |                |      |                                                                                                                                                                                                     |
| Pre-Op CRP (mg/dL)                                          |                                           |                                                                                                                                                                                                                                                                                                                                                                                                                                                                                                                                                                                                                                                                                                                                                 |                             |                                                                                     |                                                                                                                                                                                                                                                                                                                                                                                                                                      |                                                                                                                                                                                                                                                                                                                                                                    |      |                   |               |                                                             |      |                   |                    |                                                                                                    |                    |  |     |          |      |             |     |     |       |      |             |     |     |      |      |             |     |     |      |      |             |     |     |  |  |                                                                                                                                                                                                                                                                                                                                                                                                                                                                                                          |            |      |                                 |  |            |      |            |      |           |      |          |      |        |      |                |      |                                                                                                                                                                                                     |
| <10                                                         | 0                                         |                                                                                                                                                                                                                                                                                                                                                                                                                                                                                                                                                                                                                                                                                                                                                 |                             |                                                                                     |                                                                                                                                                                                                                                                                                                                                                                                                                                      |                                                                                                                                                                                                                                                                                                                                                                    |      |                   |               |                                                             |      |                   |                    |                                                                                                    |                    |  |     |          |      |             |     |     |       |      |             |     |     |      |      |             |     |     |      |      |             |     |     |  |  |                                                                                                                                                                                                                                                                                                                                                                                                                                                                                                          |            |      |                                 |  |            |      |            |      |           |      |          |      |        |      |                |      |                                                                                                                                                                                                     |
| ≥10                                                         | 1                                         |                                                                                                                                                                                                                                                                                                                                                                                                                                                                                                                                                                                                                                                                                                                                                 |                             |                                                                                     |                                                                                                                                                                                                                                                                                                                                                                                                                                      |                                                                                                                                                                                                                                                                                                                                                                    |      |                   |               |                                                             |      |                   |                    |                                                                                                    |                    |  |     |          |      |             |     |     |       |      |             |     |     |      |      |             |     |     |      |      |             |     |     |  |  |                                                                                                                                                                                                                                                                                                                                                                                                                                                                                                          |            |      |                                 |  |            |      |            |      |           |      |          |      |        |      |                |      |                                                                                                                                                                                                     |
| <b>e-NICE Rule</b>                                          | <b>Rudolph et al. (2016)<sup>44</sup></b> | <table border="1"> <thead> <tr><th>Cohort</th><th>AUROC</th><th>CI</th><th>TPR</th><th>FPR</th></tr> </thead> <tbody> <tr><td>Dev</td><td>0.81</td><td>(0.80-0.82)</td><td></td><td></td></tr> <tr><td colspan="5">Validation AUROCs*</td></tr> <tr><td>Original</td><td>0.69</td><td>(0.61-0.77)</td><td>64%</td><td>33%</td></tr> <tr><td>mRASS</td><td>0.72</td><td>(0.65-0.79)</td><td>69%</td><td>35%</td></tr> <tr><td>TMYB</td><td>0.73</td><td>(0.66-0.80)</td><td>78%</td><td>43%</td></tr> <tr><td>MoCA</td><td>0.74</td><td>(0.66-0.81)</td><td>75%</td><td>43%</td></tr> </tbody> </table> <p>*Any delirium</p> <p>Original model-AUROC of 0.68 (95%CI 0.59-0.77) in incident delirium.<br/>Did not report sens, spec, PPV, NPV</p> | Cohort                      | AUROC                                                                               | CI                                                                                                                                                                                                                                                                                                                                                                                                                                   | TPR                                                                                                                                                                                                                                                                                                                                                                | FPR  | Dev               | 0.81          | (0.80-0.82)                                                 |      |                   | Validation AUROCs* |                                                                                                    |                    |  |     | Original | 0.69 | (0.61-0.77) | 64% | 33% | mRASS | 0.72 | (0.65-0.79) | 69% | 35% | TMYB | 0.73 | (0.66-0.80) | 78% | 43% | MoCA | 0.74 | (0.66-0.81) | 75% | 43% |  |  | <table border="1"> <tr><td>Cog impair</td><td>4 pt</td></tr> <tr><td>-Medications, diagnosis or both</td><td></td></tr> <tr><td>Age ≥ 65 y</td><td>2 pt</td></tr> <tr><td>Age ≥ 80 y</td><td>3 pt</td></tr> <tr><td>Infection</td><td>2 pt</td></tr> <tr><td>Fracture</td><td>4 pt</td></tr> <tr><td>Vision</td><td>1 pt</td></tr> <tr><td>Severe Illness</td><td>2 pt</td></tr> </table> <p>0-2 pts = Low Risk<br/>2-5 pts = Intermediate Risk<br/>6-8 pts = High Risk<br/>≥ 9 pts = Very High Risk</p> | Cog impair | 4 pt | -Medications, diagnosis or both |  | Age ≥ 65 y | 2 pt | Age ≥ 80 y | 3 pt | Infection | 2 pt | Fracture | 4 pt | Vision | 1 pt | Severe Illness | 2 pt | <b>e-NICE Tool</b><br>Diagnosis of dementia, medications for dementia or both qualified as "cognitive impairment" in model.<br><br>Prospective cohort, additional:<br>-mRASS<br>-TMYB<br>-MoCA ≤ 18 |
| Cohort                                                      | AUROC                                     | CI                                                                                                                                                                                                                                                                                                                                                                                                                                                                                                                                                                                                                                                                                                                                              | TPR                         | FPR                                                                                 |                                                                                                                                                                                                                                                                                                                                                                                                                                      |                                                                                                                                                                                                                                                                                                                                                                    |      |                   |               |                                                             |      |                   |                    |                                                                                                    |                    |  |     |          |      |             |     |     |       |      |             |     |     |      |      |             |     |     |      |      |             |     |     |  |  |                                                                                                                                                                                                                                                                                                                                                                                                                                                                                                          |            |      |                                 |  |            |      |            |      |           |      |          |      |        |      |                |      |                                                                                                                                                                                                     |
| Dev                                                         | 0.81                                      | (0.80-0.82)                                                                                                                                                                                                                                                                                                                                                                                                                                                                                                                                                                                                                                                                                                                                     |                             |                                                                                     |                                                                                                                                                                                                                                                                                                                                                                                                                                      |                                                                                                                                                                                                                                                                                                                                                                    |      |                   |               |                                                             |      |                   |                    |                                                                                                    |                    |  |     |          |      |             |     |     |       |      |             |     |     |      |      |             |     |     |      |      |             |     |     |  |  |                                                                                                                                                                                                                                                                                                                                                                                                                                                                                                          |            |      |                                 |  |            |      |            |      |           |      |          |      |        |      |                |      |                                                                                                                                                                                                     |
| Validation AUROCs*                                          |                                           |                                                                                                                                                                                                                                                                                                                                                                                                                                                                                                                                                                                                                                                                                                                                                 |                             |                                                                                     |                                                                                                                                                                                                                                                                                                                                                                                                                                      |                                                                                                                                                                                                                                                                                                                                                                    |      |                   |               |                                                             |      |                   |                    |                                                                                                    |                    |  |     |          |      |             |     |     |       |      |             |     |     |      |      |             |     |     |      |      |             |     |     |  |  |                                                                                                                                                                                                                                                                                                                                                                                                                                                                                                          |            |      |                                 |  |            |      |            |      |           |      |          |      |        |      |                |      |                                                                                                                                                                                                     |
| Original                                                    | 0.69                                      | (0.61-0.77)                                                                                                                                                                                                                                                                                                                                                                                                                                                                                                                                                                                                                                                                                                                                     | 64%                         | 33%                                                                                 |                                                                                                                                                                                                                                                                                                                                                                                                                                      |                                                                                                                                                                                                                                                                                                                                                                    |      |                   |               |                                                             |      |                   |                    |                                                                                                    |                    |  |     |          |      |             |     |     |       |      |             |     |     |      |      |             |     |     |      |      |             |     |     |  |  |                                                                                                                                                                                                                                                                                                                                                                                                                                                                                                          |            |      |                                 |  |            |      |            |      |           |      |          |      |        |      |                |      |                                                                                                                                                                                                     |
| mRASS                                                       | 0.72                                      | (0.65-0.79)                                                                                                                                                                                                                                                                                                                                                                                                                                                                                                                                                                                                                                                                                                                                     | 69%                         | 35%                                                                                 |                                                                                                                                                                                                                                                                                                                                                                                                                                      |                                                                                                                                                                                                                                                                                                                                                                    |      |                   |               |                                                             |      |                   |                    |                                                                                                    |                    |  |     |          |      |             |     |     |       |      |             |     |     |      |      |             |     |     |      |      |             |     |     |  |  |                                                                                                                                                                                                                                                                                                                                                                                                                                                                                                          |            |      |                                 |  |            |      |            |      |           |      |          |      |        |      |                |      |                                                                                                                                                                                                     |
| TMYB                                                        | 0.73                                      | (0.66-0.80)                                                                                                                                                                                                                                                                                                                                                                                                                                                                                                                                                                                                                                                                                                                                     | 78%                         | 43%                                                                                 |                                                                                                                                                                                                                                                                                                                                                                                                                                      |                                                                                                                                                                                                                                                                                                                                                                    |      |                   |               |                                                             |      |                   |                    |                                                                                                    |                    |  |     |          |      |             |     |     |       |      |             |     |     |      |      |             |     |     |      |      |             |     |     |  |  |                                                                                                                                                                                                                                                                                                                                                                                                                                                                                                          |            |      |                                 |  |            |      |            |      |           |      |          |      |        |      |                |      |                                                                                                                                                                                                     |
| MoCA                                                        | 0.74                                      | (0.66-0.81)                                                                                                                                                                                                                                                                                                                                                                                                                                                                                                                                                                                                                                                                                                                                     | 75%                         | 43%                                                                                 |                                                                                                                                                                                                                                                                                                                                                                                                                                      |                                                                                                                                                                                                                                                                                                                                                                    |      |                   |               |                                                             |      |                   |                    |                                                                                                    |                    |  |     |          |      |             |     |     |       |      |             |     |     |      |      |             |     |     |      |      |             |     |     |  |  |                                                                                                                                                                                                                                                                                                                                                                                                                                                                                                          |            |      |                                 |  |            |      |            |      |           |      |          |      |        |      |                |      |                                                                                                                                                                                                     |
| Cog impair                                                  | 4 pt                                      |                                                                                                                                                                                                                                                                                                                                                                                                                                                                                                                                                                                                                                                                                                                                                 |                             |                                                                                     |                                                                                                                                                                                                                                                                                                                                                                                                                                      |                                                                                                                                                                                                                                                                                                                                                                    |      |                   |               |                                                             |      |                   |                    |                                                                                                    |                    |  |     |          |      |             |     |     |       |      |             |     |     |      |      |             |     |     |      |      |             |     |     |  |  |                                                                                                                                                                                                                                                                                                                                                                                                                                                                                                          |            |      |                                 |  |            |      |            |      |           |      |          |      |        |      |                |      |                                                                                                                                                                                                     |
| -Medications, diagnosis or both                             |                                           |                                                                                                                                                                                                                                                                                                                                                                                                                                                                                                                                                                                                                                                                                                                                                 |                             |                                                                                     |                                                                                                                                                                                                                                                                                                                                                                                                                                      |                                                                                                                                                                                                                                                                                                                                                                    |      |                   |               |                                                             |      |                   |                    |                                                                                                    |                    |  |     |          |      |             |     |     |       |      |             |     |     |      |      |             |     |     |      |      |             |     |     |  |  |                                                                                                                                                                                                                                                                                                                                                                                                                                                                                                          |            |      |                                 |  |            |      |            |      |           |      |          |      |        |      |                |      |                                                                                                                                                                                                     |
| Age ≥ 65 y                                                  | 2 pt                                      |                                                                                                                                                                                                                                                                                                                                                                                                                                                                                                                                                                                                                                                                                                                                                 |                             |                                                                                     |                                                                                                                                                                                                                                                                                                                                                                                                                                      |                                                                                                                                                                                                                                                                                                                                                                    |      |                   |               |                                                             |      |                   |                    |                                                                                                    |                    |  |     |          |      |             |     |     |       |      |             |     |     |      |      |             |     |     |      |      |             |     |     |  |  |                                                                                                                                                                                                                                                                                                                                                                                                                                                                                                          |            |      |                                 |  |            |      |            |      |           |      |          |      |        |      |                |      |                                                                                                                                                                                                     |
| Age ≥ 80 y                                                  | 3 pt                                      |                                                                                                                                                                                                                                                                                                                                                                                                                                                                                                                                                                                                                                                                                                                                                 |                             |                                                                                     |                                                                                                                                                                                                                                                                                                                                                                                                                                      |                                                                                                                                                                                                                                                                                                                                                                    |      |                   |               |                                                             |      |                   |                    |                                                                                                    |                    |  |     |          |      |             |     |     |       |      |             |     |     |      |      |             |     |     |      |      |             |     |     |  |  |                                                                                                                                                                                                                                                                                                                                                                                                                                                                                                          |            |      |                                 |  |            |      |            |      |           |      |          |      |        |      |                |      |                                                                                                                                                                                                     |
| Infection                                                   | 2 pt                                      |                                                                                                                                                                                                                                                                                                                                                                                                                                                                                                                                                                                                                                                                                                                                                 |                             |                                                                                     |                                                                                                                                                                                                                                                                                                                                                                                                                                      |                                                                                                                                                                                                                                                                                                                                                                    |      |                   |               |                                                             |      |                   |                    |                                                                                                    |                    |  |     |          |      |             |     |     |       |      |             |     |     |      |      |             |     |     |      |      |             |     |     |  |  |                                                                                                                                                                                                                                                                                                                                                                                                                                                                                                          |            |      |                                 |  |            |      |            |      |           |      |          |      |        |      |                |      |                                                                                                                                                                                                     |
| Fracture                                                    | 4 pt                                      |                                                                                                                                                                                                                                                                                                                                                                                                                                                                                                                                                                                                                                                                                                                                                 |                             |                                                                                     |                                                                                                                                                                                                                                                                                                                                                                                                                                      |                                                                                                                                                                                                                                                                                                                                                                    |      |                   |               |                                                             |      |                   |                    |                                                                                                    |                    |  |     |          |      |             |     |     |       |      |             |     |     |      |      |             |     |     |      |      |             |     |     |  |  |                                                                                                                                                                                                                                                                                                                                                                                                                                                                                                          |            |      |                                 |  |            |      |            |      |           |      |          |      |        |      |                |      |                                                                                                                                                                                                     |
| Vision                                                      | 1 pt                                      |                                                                                                                                                                                                                                                                                                                                                                                                                                                                                                                                                                                                                                                                                                                                                 |                             |                                                                                     |                                                                                                                                                                                                                                                                                                                                                                                                                                      |                                                                                                                                                                                                                                                                                                                                                                    |      |                   |               |                                                             |      |                   |                    |                                                                                                    |                    |  |     |          |      |             |     |     |       |      |             |     |     |      |      |             |     |     |      |      |             |     |     |  |  |                                                                                                                                                                                                                                                                                                                                                                                                                                                                                                          |            |      |                                 |  |            |      |            |      |           |      |          |      |        |      |                |      |                                                                                                                                                                                                     |
| Severe Illness                                              | 2 pt                                      |                                                                                                                                                                                                                                                                                                                                                                                                                                                                                                                                                                                                                                                                                                                                                 |                             |                                                                                     |                                                                                                                                                                                                                                                                                                                                                                                                                                      |                                                                                                                                                                                                                                                                                                                                                                    |      |                   |               |                                                             |      |                   |                    |                                                                                                    |                    |  |     |          |      |             |     |     |       |      |             |     |     |      |      |             |     |     |      |      |             |     |     |  |  |                                                                                                                                                                                                                                                                                                                                                                                                                                                                                                          |            |      |                                 |  |            |      |            |      |           |      |          |      |        |      |                |      |                                                                                                                                                                                                     |
| <b>Inouye Prediction Rule (IPR)</b>                         | Inouye et al. (1993) <sup>30</sup>        | Dev: 27(25)<br>Val: 29(17)                                                                                                                                                                                                                                                                                                                                                                                                                                                                                                                                                                                                                                                                                                                      | Did not report              | Dev: 0.74 (0.63-0.85)<br>Val: 0.66 (0.55-0.77)                                      | <table border="1"> <tr><td>Baseline cognitive impairment</td><td>1 pt</td></tr> <tr><td>High BUN/Cr ratio</td><td>1 pt</td></tr> <tr><td>Severe illness (Composite score: APACHE II &gt;16 + RN rating)</td><td>1 pt</td></tr> <tr><td>Vision impairment</td><td>1 pt</td></tr> </table> <p>Not weighted.<br/>0 pts = Low risk<br/>1-2 pts = Intermediate risk<br/>3-4 pts = High risk</p> <p>RR in High Risk group: 9.5 (no CI)</p> | Baseline cognitive impairment                                                                                                                                                                                                                                                                                                                                      | 1 pt | High BUN/Cr ratio | 1 pt          | Severe illness (Composite score: APACHE II >16 + RN rating) | 1 pt | Vision impairment | 1 pt               | MMSE Cut-off < 24<br><br>Family/care giver bDRS<br><br>Excluded those w/history of severe dementia |                    |  |     |          |      |             |     |     |       |      |             |     |     |      |      |             |     |     |      |      |             |     |     |  |  |                                                                                                                                                                                                                                                                                                                                                                                                                                                                                                          |            |      |                                 |  |            |      |            |      |           |      |          |      |        |      |                |      |                                                                                                                                                                                                     |
| Baseline cognitive impairment                               | 1 pt                                      |                                                                                                                                                                                                                                                                                                                                                                                                                                                                                                                                                                                                                                                                                                                                                 |                             |                                                                                     |                                                                                                                                                                                                                                                                                                                                                                                                                                      |                                                                                                                                                                                                                                                                                                                                                                    |      |                   |               |                                                             |      |                   |                    |                                                                                                    |                    |  |     |          |      |             |     |     |       |      |             |     |     |      |      |             |     |     |      |      |             |     |     |  |  |                                                                                                                                                                                                                                                                                                                                                                                                                                                                                                          |            |      |                                 |  |            |      |            |      |           |      |          |      |        |      |                |      |                                                                                                                                                                                                     |
| High BUN/Cr ratio                                           | 1 pt                                      |                                                                                                                                                                                                                                                                                                                                                                                                                                                                                                                                                                                                                                                                                                                                                 |                             |                                                                                     |                                                                                                                                                                                                                                                                                                                                                                                                                                      |                                                                                                                                                                                                                                                                                                                                                                    |      |                   |               |                                                             |      |                   |                    |                                                                                                    |                    |  |     |          |      |             |     |     |       |      |             |     |     |      |      |             |     |     |      |      |             |     |     |  |  |                                                                                                                                                                                                                                                                                                                                                                                                                                                                                                          |            |      |                                 |  |            |      |            |      |           |      |          |      |        |      |                |      |                                                                                                                                                                                                     |
| Severe illness (Composite score: APACHE II >16 + RN rating) | 1 pt                                      |                                                                                                                                                                                                                                                                                                                                                                                                                                                                                                                                                                                                                                                                                                                                                 |                             |                                                                                     |                                                                                                                                                                                                                                                                                                                                                                                                                                      |                                                                                                                                                                                                                                                                                                                                                                    |      |                   |               |                                                             |      |                   |                    |                                                                                                    |                    |  |     |          |      |             |     |     |       |      |             |     |     |      |      |             |     |     |      |      |             |     |     |  |  |                                                                                                                                                                                                                                                                                                                                                                                                                                                                                                          |            |      |                                 |  |            |      |            |      |           |      |          |      |        |      |                |      |                                                                                                                                                                                                     |
| Vision impairment                                           | 1 pt                                      |                                                                                                                                                                                                                                                                                                                                                                                                                                                                                                                                                                                                                                                                                                                                                 |                             |                                                                                     |                                                                                                                                                                                                                                                                                                                                                                                                                                      |                                                                                                                                                                                                                                                                                                                                                                    |      |                   |               |                                                             |      |                   |                    |                                                                                                    |                    |  |     |          |      |             |     |     |       |      |             |     |     |      |      |             |     |     |      |      |             |     |     |  |  |                                                                                                                                                                                                                                                                                                                                                                                                                                                                                                          |            |      |                                 |  |            |      |            |      |           |      |          |      |        |      |                |      |                                                                                                                                                                                                     |
| <b>IPR</b>                                                  | Kalisvaart et al. (2006) <sup>34</sup>    | Val: 74(12)                                                                                                                                                                                                                                                                                                                                                                                                                                                                                                                                                                                                                                                                                                                                     | Did not report              | Val: 0.73 (0.65-0.78)<br>Calibration: $\chi^2$ $p<0.05$<br>$\chi^2$ Trend $p<0.002$ | Externally validated IPR in surgical hip fracture population.<br>-Addition of age & type of admission improved model performance, $R^2=0.20$                                                                                                                                                                                                                                                                                         | MMSE Cut-off < 24                                                                                                                                                                                                                                                                                                                                                  |      |                   |               |                                                             |      |                   |                    |                                                                                                    |                    |  |     |          |      |             |     |     |       |      |             |     |     |      |      |             |     |     |      |      |             |     |     |  |  |                                                                                                                                                                                                                                                                                                                                                                                                                                                                                                          |            |      |                                 |  |            |      |            |      |           |      |          |      |        |      |                |      |                                                                                                                                                                                                     |
| <b>IPR</b>                                                  | Rudolph et al. (2011) <sup>45</sup>       | Val: 23(23)<br>Any delirium                                                                                                                                                                                                                                                                                                                                                                                                                                                                                                                                                                                                                                                                                                                     | Did not report              | Val: 0.56 (0.42-0.74)<br>Incident del.<br>Calibration: $\chi^2$ 1.3, $p=0.53$       | Externally validated IPR in medical VA population, investigated feasibility of chart abstraction tool.                                                                                                                                                                                                                                                                                                                               | MMSE Cut-off < 24                                                                                                                                                                                                                                                                                                                                                  |      |                   |               |                                                             |      |                   |                    |                                                                                                    |                    |  |     |          |      |             |     |     |       |      |             |     |     |      |      |             |     |     |      |      |             |     |     |  |  |                                                                                                                                                                                                                                                                                                                                                                                                                                                                                                          |            |      |                                 |  |            |      |            |      |           |      |          |      |        |      |                |      |                                                                                                                                                                                                     |
| <b>IPR</b>                                                  | Pendlebury et al. (2016) <sup>33</sup>    | Val: 95(31)<br>Any delirium                                                                                                                                                                                                                                                                                                                                                                                                                                                                                                                                                                                                                                                                                                                     | Cutoff 2pts<br>All Delirium | Val: Incident delirium Cohort (MMSE) 1 0.73                                         | <table border="1"> <tr><td>Baseline cognitive impairment</td><td>1 pt</td></tr> <tr><td>High BUN/Cr ratio</td><td>1 pt</td></tr> <tr><td>Severe illness (SIRS ≥ 2)</td><td>1 pt</td></tr> <tr><td>Vision impairment</td><td>1 pt</td></tr> </table>                                                                                                                                                                                  | Baseline cognitive impairment                                                                                                                                                                                                                                                                                                                                      | 1 pt | High BUN/Cr ratio | 1 pt          | Severe illness (SIRS ≥ 2)                                   | 1 pt | Vision impairment | 1 pt               | Original Model: MMSE <24<br><br>Modified Model:                                                    |                    |  |     |          |      |             |     |     |       |      |             |     |     |      |      |             |     |     |      |      |             |     |     |  |  |                                                                                                                                                                                                                                                                                                                                                                                                                                                                                                          |            |      |                                 |  |            |      |            |      |           |      |          |      |        |      |                |      |                                                                                                                                                                                                     |
| Baseline cognitive impairment                               | 1 pt                                      |                                                                                                                                                                                                                                                                                                                                                                                                                                                                                                                                                                                                                                                                                                                                                 |                             |                                                                                     |                                                                                                                                                                                                                                                                                                                                                                                                                                      |                                                                                                                                                                                                                                                                                                                                                                    |      |                   |               |                                                             |      |                   |                    |                                                                                                    |                    |  |     |          |      |             |     |     |       |      |             |     |     |      |      |             |     |     |      |      |             |     |     |  |  |                                                                                                                                                                                                                                                                                                                                                                                                                                                                                                          |            |      |                                 |  |            |      |            |      |           |      |          |      |        |      |                |      |                                                                                                                                                                                                     |
| High BUN/Cr ratio                                           | 1 pt                                      |                                                                                                                                                                                                                                                                                                                                                                                                                                                                                                                                                                                                                                                                                                                                                 |                             |                                                                                     |                                                                                                                                                                                                                                                                                                                                                                                                                                      |                                                                                                                                                                                                                                                                                                                                                                    |      |                   |               |                                                             |      |                   |                    |                                                                                                    |                    |  |     |          |      |             |     |     |       |      |             |     |     |      |      |             |     |     |      |      |             |     |     |  |  |                                                                                                                                                                                                                                                                                                                                                                                                                                                                                                          |            |      |                                 |  |            |      |            |      |           |      |          |      |        |      |                |      |                                                                                                                                                                                                     |
| Severe illness (SIRS ≥ 2)                                   | 1 pt                                      |                                                                                                                                                                                                                                                                                                                                                                                                                                                                                                                                                                                                                                                                                                                                                 |                             |                                                                                     |                                                                                                                                                                                                                                                                                                                                                                                                                                      |                                                                                                                                                                                                                                                                                                                                                                    |      |                   |               |                                                             |      |                   |                    |                                                                                                    |                    |  |     |          |      |             |     |     |       |      |             |     |     |      |      |             |     |     |      |      |             |     |     |  |  |                                                                                                                                                                                                                                                                                                                                                                                                                                                                                                          |            |      |                                 |  |            |      |            |      |           |      |          |      |        |      |                |      |                                                                                                                                                                                                     |
| Vision impairment                                           | 1 pt                                      |                                                                                                                                                                                                                                                                                                                                                                                                                                                                                                                                                                                                                                                                                                                                                 |                             |                                                                                     |                                                                                                                                                                                                                                                                                                                                                                                                                                      |                                                                                                                                                                                                                                                                                                                                                                    |      |                   |               |                                                             |      |                   |                    |                                                                                                    |                    |  |     |          |      |             |     |     |       |      |             |     |     |      |      |             |     |     |      |      |             |     |     |  |  |                                                                                                                                                                                                                                                                                                                                                                                                                                                                                                          |            |      |                                 |  |            |      |            |      |           |      |          |      |        |      |                |      |                                                                                                                                                                                                     |

|                                   |                                                            |                                                                                                           |                                                                                                                                                           |                                                                                                                                                                              |                                                                                                                                                                                                                                                                                                                                                                       |                                                                                                              |
|-----------------------------------|------------------------------------------------------------|-----------------------------------------------------------------------------------------------------------|-----------------------------------------------------------------------------------------------------------------------------------------------------------|------------------------------------------------------------------------------------------------------------------------------------------------------------------------------|-----------------------------------------------------------------------------------------------------------------------------------------------------------------------------------------------------------------------------------------------------------------------------------------------------------------------------------------------------------------------|--------------------------------------------------------------------------------------------------------------|
|                                   |                                                            |                                                                                                           | Incident D<br>Sens .52<br>Spec .80<br>PPV .31<br>NPV .91                                                                                                  | (0.62-0.84)<br>Cohort 2-<br>(AMTS)<br>0.70 (0.60-0.81)                                                                                                                       | 4pts=Incident delirium                                                                                                                                                                                                                                                                                                                                                | MMSE<br>< 24<br>AMTS<br>< 9                                                                                  |
| <b>Isfandiatty model</b>          | Pendlebury et al. (2016) <sup>33</sup><br>Broad val.       | Dev: 87(19)<br>Val: 95 (31)<br>Any delirium<br>67-prevalent<br>28-incident                                | Cutoff 4pts<br>Any Delirium<br>Sens .74<br>Spec .71<br>PPV .60<br>NPV .82<br>Incident Del<br>Sens .81<br>Spec .71<br>PPV .31<br>NPV .96                   | Dev: 0.82<br>(0.77-0.88)<br>Val:<br>Incident delirium<br>Cohort 1 (MMSE)<br>0.83<br>(0.74-0.91)<br>Cohort 2 (AMTS)<br>0.77<br>(0.67-0.86)                                    | Baseline cognitive 3 pt<br>impairment<br>Functional dependency 2 pt<br>Infection w/sepsis 2 pt<br>Infection w/out sepsis 1 pt<br>Weighted Score<br>Score = 7 for incident delirium<br><br>Cohort 1: MMSE<br>Cohort 2: AMTS                                                                                                                                            | <u>Original Model:</u><br>Chart review<br><br><u>Modified Model:</u><br>MMSE<br>< 24<br>AMTS<br>< 9          |
| <b>Martinez et al. 2012 model</b> | Pendlebury et al. (2016) <sup>33</sup><br>Broad val.       | 1 <sup>st</sup> Val: 76(25)<br>2 <sup>nd</sup> Val: 95(31)<br>Any delirium<br>67-prevalent<br>28-incident | Modified Model<br>Cutoff 2pts<br>Any Delirium<br>Sens .62<br>Spec .68<br>PPV .54<br>NPV .75<br>Incident Del<br>Sens .81<br>Spec .68<br>PPV .29<br>NPV .96 | 1 <sup>st</sup> Val:<br>0.85<br>(0.80-0.88)<br>Incident delirium<br>2 <sup>nd</sup> Val:<br>Cohort 1 (MMSE)<br>0.78<br>(0.68-0.88)<br>Cohort 2 (AMTS)<br>0.75<br>(0.65-0.84) | Martinez et al. 2012 Original Model<br>Age >85 1 pt<br>Dependent in ≥5 ADLs 1 pt<br>Drugs on admit:<br>-Antidepressants 1pt/drug<br>-Antidementia 2pt/<br>-anticonvulsants antipsych<br>-antipsychotics<br>Score 0-3<br>Score >1 = high risk for delirium<br>Modified Model<br>Age >85 1 pt<br>Dependency in ≥ 5 ADLs 1 pt<br>Diag of Dementia MMSE<24<br>AMTS<9 1 pt | <u>Original Model:</u><br>-No cognitive measure<br><br><u>Modified Model:</u><br>MMSE<br>< 24<br>AMTS<br>< 9 |
| <b>Pompei et al. 1994 model</b>   | Pompei et al. (1994) <sup>43</sup><br>Broad val.           | Dev: 64(15)<br>Val: 86(26)<br><br>(21=prevalent delirium)                                                 | Sens .83<br>Spec .50<br>PPV .38<br>NPV .89<br><br>*Pts stratified as low or moderate to high-risk                                                         | Dev: 0.74<br>+/- 0.05<br>Val: 0.64<br>+/- 0.05<br><br>Calibration:<br>$\chi^2$ Trend<br>$p<0.0001$                                                                           | Weighted Points<br>Baseline cognitive 2 pt<br>impairment<br>Depression 2 pt<br>Alcoholism 3 pt<br>≥ 4 comorbidities 3 pt<br><br>0-3 pts = Low risk<br>4-7 pts = Moderate risk<br>8-10 pts = High risk                                                                                                                                                                 | MMSE<br>Less than HS <21<br>High school <23<br>College edu < 24                                              |
| <b>Precipitating Risk Factors</b> | Inouye and Charpentier (1996) <sup>29</sup><br>Narrow val. | Dev: 35(18)<br>Val: 47(15)<br><br>(incident delirium)                                                     | Not reported                                                                                                                                              | No AUROC reported<br><br>Calibration:<br>$\chi^2$ Trend<br>$p<0.001$                                                                                                         | Physical restraint use 1 pt<br>Malnutrition 1 pt<br>≥3 medications added 1 pt<br>Bladder catheterization 1 pt<br>Any iatrogenic event 1 pt<br>Not weighted.<br>0 pt = Low Risk<br>1-2 pt = Intermediate<br>≥ 3 pt = High Risk<br>RR of High Risk: 17.5 (8.1-37.4)                                                                                                     | None used in model                                                                                           |

| <b>Risk Model for Delirium (RD)</b>                                                                                                                                                                                                                                                                                                                                                                                                                                                                                                               | Moerman et al. (2012) <sup>41</sup><br><br>Narrow val.   | Val: 102(27)<br><br>(incident delirium)  | Sens .81<br>Spec .56<br>PPV .41<br>NPV .89<br><br>Optimal cut-off score: 4 pts | Val: 0.73 (0.68-0.77)                                                      | <table border="1"> <thead> <tr> <th colspan="2">Weighted Points</th> </tr> </thead> <tbody> <tr> <td>Delirium-previous hospitalization</td> <td>5 pt</td> </tr> <tr> <td>Dementia</td> <td>5 pt</td> </tr> <tr> <td>Clock Drawing</td> <td></td> </tr> <tr> <td>-Sm mistake</td> <td>1 pt</td> </tr> <tr> <td>-big mistake</td> <td>2 pt</td> </tr> <tr> <td>Age</td> <td></td> </tr> <tr> <td>-70 to 85 years old</td> <td>1 pt</td> </tr> <tr> <td>- &gt;85 years</td> <td>2 pt</td> </tr> <tr> <td>Impaired hearing</td> <td>1 pt</td> </tr> <tr> <td>Impaired vision</td> <td>1 pt</td> </tr> <tr> <td>Problems w/ADL</td> <td></td> </tr> <tr> <td>-Help w/meal prep</td> <td>.5p</td> </tr> <tr> <td>-help w/physical</td> <td>.5p</td> </tr> <tr> <td>Use of heroin, methadone, morphine</td> <td>2 pt</td> </tr> <tr> <td>Daily &gt;4 alcohol</td> <td>2 pt</td> </tr> </tbody> </table> <p>≥ 5 pts = High risk</p> | Weighted Points |  | Delirium-previous hospitalization | 5 pt | Dementia      | 5 pt | Clock Drawing          |   | -Sm mistake                 | 1 pt | -big mistake      | 2 pt | Age                                                  |  | -70 to 85 years old | 1 pt | - >85 years | 2 pt | Impaired hearing | 1 pt | Impaired vision | 1 pt | Problems w/ADL |  | -Help w/meal prep | .5p | -help w/physical | .5p | Use of heroin, methadone, morphine | 2 pt | Daily >4 alcohol | 2 pt | CDT<br>-11:10<br>-Two Categories<br>1 Small mistakes<br>2 Big mistakes |
|---------------------------------------------------------------------------------------------------------------------------------------------------------------------------------------------------------------------------------------------------------------------------------------------------------------------------------------------------------------------------------------------------------------------------------------------------------------------------------------------------------------------------------------------------|----------------------------------------------------------|------------------------------------------|--------------------------------------------------------------------------------|----------------------------------------------------------------------------|-----------------------------------------------------------------------------------------------------------------------------------------------------------------------------------------------------------------------------------------------------------------------------------------------------------------------------------------------------------------------------------------------------------------------------------------------------------------------------------------------------------------------------------------------------------------------------------------------------------------------------------------------------------------------------------------------------------------------------------------------------------------------------------------------------------------------------------------------------------------------------------------------------------------------------|-----------------|--|-----------------------------------|------|---------------|------|------------------------|---|-----------------------------|------|-------------------|------|------------------------------------------------------|--|---------------------|------|-------------|------|------------------|------|-----------------|------|----------------|--|-------------------|-----|------------------|-----|------------------------------------|------|------------------|------|------------------------------------------------------------------------|
| Weighted Points                                                                                                                                                                                                                                                                                                                                                                                                                                                                                                                                   |                                                          |                                          |                                                                                |                                                                            |                                                                                                                                                                                                                                                                                                                                                                                                                                                                                                                                                                                                                                                                                                                                                                                                                                                                                                                             |                 |  |                                   |      |               |      |                        |   |                             |      |                   |      |                                                      |  |                     |      |             |      |                  |      |                 |      |                |  |                   |     |                  |     |                                    |      |                  |      |                                                                        |
| Delirium-previous hospitalization                                                                                                                                                                                                                                                                                                                                                                                                                                                                                                                 | 5 pt                                                     |                                          |                                                                                |                                                                            |                                                                                                                                                                                                                                                                                                                                                                                                                                                                                                                                                                                                                                                                                                                                                                                                                                                                                                                             |                 |  |                                   |      |               |      |                        |   |                             |      |                   |      |                                                      |  |                     |      |             |      |                  |      |                 |      |                |  |                   |     |                  |     |                                    |      |                  |      |                                                                        |
| Dementia                                                                                                                                                                                                                                                                                                                                                                                                                                                                                                                                          | 5 pt                                                     |                                          |                                                                                |                                                                            |                                                                                                                                                                                                                                                                                                                                                                                                                                                                                                                                                                                                                                                                                                                                                                                                                                                                                                                             |                 |  |                                   |      |               |      |                        |   |                             |      |                   |      |                                                      |  |                     |      |             |      |                  |      |                 |      |                |  |                   |     |                  |     |                                    |      |                  |      |                                                                        |
| Clock Drawing                                                                                                                                                                                                                                                                                                                                                                                                                                                                                                                                     |                                                          |                                          |                                                                                |                                                                            |                                                                                                                                                                                                                                                                                                                                                                                                                                                                                                                                                                                                                                                                                                                                                                                                                                                                                                                             |                 |  |                                   |      |               |      |                        |   |                             |      |                   |      |                                                      |  |                     |      |             |      |                  |      |                 |      |                |  |                   |     |                  |     |                                    |      |                  |      |                                                                        |
| -Sm mistake                                                                                                                                                                                                                                                                                                                                                                                                                                                                                                                                       | 1 pt                                                     |                                          |                                                                                |                                                                            |                                                                                                                                                                                                                                                                                                                                                                                                                                                                                                                                                                                                                                                                                                                                                                                                                                                                                                                             |                 |  |                                   |      |               |      |                        |   |                             |      |                   |      |                                                      |  |                     |      |             |      |                  |      |                 |      |                |  |                   |     |                  |     |                                    |      |                  |      |                                                                        |
| -big mistake                                                                                                                                                                                                                                                                                                                                                                                                                                                                                                                                      | 2 pt                                                     |                                          |                                                                                |                                                                            |                                                                                                                                                                                                                                                                                                                                                                                                                                                                                                                                                                                                                                                                                                                                                                                                                                                                                                                             |                 |  |                                   |      |               |      |                        |   |                             |      |                   |      |                                                      |  |                     |      |             |      |                  |      |                 |      |                |  |                   |     |                  |     |                                    |      |                  |      |                                                                        |
| Age                                                                                                                                                                                                                                                                                                                                                                                                                                                                                                                                               |                                                          |                                          |                                                                                |                                                                            |                                                                                                                                                                                                                                                                                                                                                                                                                                                                                                                                                                                                                                                                                                                                                                                                                                                                                                                             |                 |  |                                   |      |               |      |                        |   |                             |      |                   |      |                                                      |  |                     |      |             |      |                  |      |                 |      |                |  |                   |     |                  |     |                                    |      |                  |      |                                                                        |
| -70 to 85 years old                                                                                                                                                                                                                                                                                                                                                                                                                                                                                                                               | 1 pt                                                     |                                          |                                                                                |                                                                            |                                                                                                                                                                                                                                                                                                                                                                                                                                                                                                                                                                                                                                                                                                                                                                                                                                                                                                                             |                 |  |                                   |      |               |      |                        |   |                             |      |                   |      |                                                      |  |                     |      |             |      |                  |      |                 |      |                |  |                   |     |                  |     |                                    |      |                  |      |                                                                        |
| - >85 years                                                                                                                                                                                                                                                                                                                                                                                                                                                                                                                                       | 2 pt                                                     |                                          |                                                                                |                                                                            |                                                                                                                                                                                                                                                                                                                                                                                                                                                                                                                                                                                                                                                                                                                                                                                                                                                                                                                             |                 |  |                                   |      |               |      |                        |   |                             |      |                   |      |                                                      |  |                     |      |             |      |                  |      |                 |      |                |  |                   |     |                  |     |                                    |      |                  |      |                                                                        |
| Impaired hearing                                                                                                                                                                                                                                                                                                                                                                                                                                                                                                                                  | 1 pt                                                     |                                          |                                                                                |                                                                            |                                                                                                                                                                                                                                                                                                                                                                                                                                                                                                                                                                                                                                                                                                                                                                                                                                                                                                                             |                 |  |                                   |      |               |      |                        |   |                             |      |                   |      |                                                      |  |                     |      |             |      |                  |      |                 |      |                |  |                   |     |                  |     |                                    |      |                  |      |                                                                        |
| Impaired vision                                                                                                                                                                                                                                                                                                                                                                                                                                                                                                                                   | 1 pt                                                     |                                          |                                                                                |                                                                            |                                                                                                                                                                                                                                                                                                                                                                                                                                                                                                                                                                                                                                                                                                                                                                                                                                                                                                                             |                 |  |                                   |      |               |      |                        |   |                             |      |                   |      |                                                      |  |                     |      |             |      |                  |      |                 |      |                |  |                   |     |                  |     |                                    |      |                  |      |                                                                        |
| Problems w/ADL                                                                                                                                                                                                                                                                                                                                                                                                                                                                                                                                    |                                                          |                                          |                                                                                |                                                                            |                                                                                                                                                                                                                                                                                                                                                                                                                                                                                                                                                                                                                                                                                                                                                                                                                                                                                                                             |                 |  |                                   |      |               |      |                        |   |                             |      |                   |      |                                                      |  |                     |      |             |      |                  |      |                 |      |                |  |                   |     |                  |     |                                    |      |                  |      |                                                                        |
| -Help w/meal prep                                                                                                                                                                                                                                                                                                                                                                                                                                                                                                                                 | .5p                                                      |                                          |                                                                                |                                                                            |                                                                                                                                                                                                                                                                                                                                                                                                                                                                                                                                                                                                                                                                                                                                                                                                                                                                                                                             |                 |  |                                   |      |               |      |                        |   |                             |      |                   |      |                                                      |  |                     |      |             |      |                  |      |                 |      |                |  |                   |     |                  |     |                                    |      |                  |      |                                                                        |
| -help w/physical                                                                                                                                                                                                                                                                                                                                                                                                                                                                                                                                  | .5p                                                      |                                          |                                                                                |                                                                            |                                                                                                                                                                                                                                                                                                                                                                                                                                                                                                                                                                                                                                                                                                                                                                                                                                                                                                                             |                 |  |                                   |      |               |      |                        |   |                             |      |                   |      |                                                      |  |                     |      |             |      |                  |      |                 |      |                |  |                   |     |                  |     |                                    |      |                  |      |                                                                        |
| Use of heroin, methadone, morphine                                                                                                                                                                                                                                                                                                                                                                                                                                                                                                                | 2 pt                                                     |                                          |                                                                                |                                                                            |                                                                                                                                                                                                                                                                                                                                                                                                                                                                                                                                                                                                                                                                                                                                                                                                                                                                                                                             |                 |  |                                   |      |               |      |                        |   |                             |      |                   |      |                                                      |  |                     |      |             |      |                  |      |                 |      |                |  |                   |     |                  |     |                                    |      |                  |      |                                                                        |
| Daily >4 alcohol                                                                                                                                                                                                                                                                                                                                                                                                                                                                                                                                  | 2 pt                                                     |                                          |                                                                                |                                                                            |                                                                                                                                                                                                                                                                                                                                                                                                                                                                                                                                                                                                                                                                                                                                                                                                                                                                                                                             |                 |  |                                   |      |               |      |                        |   |                             |      |                   |      |                                                      |  |                     |      |             |      |                  |      |                 |      |                |  |                   |     |                  |     |                                    |      |                  |      |                                                                        |
| <b>Susceptibility Score</b>                                                                                                                                                                                                                                                                                                                                                                                                                                                                                                                       | Pendlebury et al. (2016) <sup>48</sup><br><br>Broad val. | Val: 308(28)<br><br>(incidence delirium) | Sens 0.71<br>Spec 0.88<br>PPV 0.5<br>NPV 0.95<br><br>Cut-off Score: 5 pts      | Val: 0.81 (0.70-0.92)<br><br>Improved w/age eliminated to 0.84 (0.77-0.92) | <table border="1"> <thead> <tr> <th colspan="2">Weighted Points</th> </tr> </thead> <tbody> <tr> <td>Dementia/cog impair</td> <td>2</td> </tr> <tr> <td>Age &gt;80 years</td> <td>2</td> </tr> <tr> <td>Severe illness (SIRS+)</td> <td>1</td> </tr> <tr> <td>Infection-working diagnosis</td> <td>1</td> </tr> <tr> <td>Vision impairment</td> <td>1</td> </tr> </tbody> </table> <p>&gt;5 pts=High Risk</p> <p>ORs for &gt;5 risk score: 25.0 (3.0-208.9)<br/>RR for &gt;5 risk score: 5.4</p>                                                                                                                                                                                                                                                                                                                                                                                                                            | Weighted Points |  | Dementia/cog impair               | 2    | Age >80 years | 2    | Severe illness (SIRS+) | 1 | Infection-working diagnosis | 1    | Vision impairment | 1    | Known diagnosis of dementia or MMSE < 24<br>AMTS < 9 |  |                     |      |             |      |                  |      |                 |      |                |  |                   |     |                  |     |                                    |      |                  |      |                                                                        |
| Weighted Points                                                                                                                                                                                                                                                                                                                                                                                                                                                                                                                                   |                                                          |                                          |                                                                                |                                                                            |                                                                                                                                                                                                                                                                                                                                                                                                                                                                                                                                                                                                                                                                                                                                                                                                                                                                                                                             |                 |  |                                   |      |               |      |                        |   |                             |      |                   |      |                                                      |  |                     |      |             |      |                  |      |                 |      |                |  |                   |     |                  |     |                                    |      |                  |      |                                                                        |
| Dementia/cog impair                                                                                                                                                                                                                                                                                                                                                                                                                                                                                                                               | 2                                                        |                                          |                                                                                |                                                                            |                                                                                                                                                                                                                                                                                                                                                                                                                                                                                                                                                                                                                                                                                                                                                                                                                                                                                                                             |                 |  |                                   |      |               |      |                        |   |                             |      |                   |      |                                                      |  |                     |      |             |      |                  |      |                 |      |                |  |                   |     |                  |     |                                    |      |                  |      |                                                                        |
| Age >80 years                                                                                                                                                                                                                                                                                                                                                                                                                                                                                                                                     | 2                                                        |                                          |                                                                                |                                                                            |                                                                                                                                                                                                                                                                                                                                                                                                                                                                                                                                                                                                                                                                                                                                                                                                                                                                                                                             |                 |  |                                   |      |               |      |                        |   |                             |      |                   |      |                                                      |  |                     |      |             |      |                  |      |                 |      |                |  |                   |     |                  |     |                                    |      |                  |      |                                                                        |
| Severe illness (SIRS+)                                                                                                                                                                                                                                                                                                                                                                                                                                                                                                                            | 1                                                        |                                          |                                                                                |                                                                            |                                                                                                                                                                                                                                                                                                                                                                                                                                                                                                                                                                                                                                                                                                                                                                                                                                                                                                                             |                 |  |                                   |      |               |      |                        |   |                             |      |                   |      |                                                      |  |                     |      |             |      |                  |      |                 |      |                |  |                   |     |                  |     |                                    |      |                  |      |                                                                        |
| Infection-working diagnosis                                                                                                                                                                                                                                                                                                                                                                                                                                                                                                                       | 1                                                        |                                          |                                                                                |                                                                            |                                                                                                                                                                                                                                                                                                                                                                                                                                                                                                                                                                                                                                                                                                                                                                                                                                                                                                                             |                 |  |                                   |      |               |      |                        |   |                             |      |                   |      |                                                      |  |                     |      |             |      |                  |      |                 |      |                |  |                   |     |                  |     |                                    |      |                  |      |                                                                        |
| Vision impairment                                                                                                                                                                                                                                                                                                                                                                                                                                                                                                                                 | 1                                                        |                                          |                                                                                |                                                                            |                                                                                                                                                                                                                                                                                                                                                                                                                                                                                                                                                                                                                                                                                                                                                                                                                                                                                                                             |                 |  |                                   |      |               |      |                        |   |                             |      |                   |      |                                                      |  |                     |      |             |      |                  |      |                 |      |                |  |                   |     |                  |     |                                    |      |                  |      |                                                                        |
| <p>Key:<br/>Dev=Development, Val=Validation<br/>Sens=Sensitivity, Spec=Specificity, PPV=Positive Predictive Value, NPV=Negative Predictive Value<br/>Area Under the Receiver Operating Curve Statistic, Dev=Development, Val=Validation, mRASS=Modified Richmond Agitation-Sedation Scale, TMTYB=The Months of the Year Backwards<br/>ADL=Activities of Daily Living<br/>MMSE=Mini Mental Status Exam, AMTS=Abbreviated Mental Test Score, CDT=Clock Drawing Test, mBDR=Modified Blessed Dementia Rating, MoCA=Montreal Cognitive Assessment.</p> |                                                          |                                          |                                                                                |                                                                            |                                                                                                                                                                                                                                                                                                                                                                                                                                                                                                                                                                                                                                                                                                                                                                                                                                                                                                                             |                 |  |                                   |      |               |      |                        |   |                             |      |                   |      |                                                      |  |                     |      |             |      |                  |      |                 |      |                |  |                   |     |                  |     |                                    |      |                  |      |                                                                        |

### Predictive ability

Reported AUROC in externally validated delirium prediction models ranged from 0.52-0.94 (Figure 4). Of these models, the highest performing model (AUROC 0.94, CI 0.91-0.97) was developed and validated in a surgical population.<sup>35</sup> Two models reported an external validation AUROC above 0.80, indicating moderate predictive ability.<sup>33 48</sup> Both were developed and validated in medical populations and share similarities with variable use including pre-existing cognitive impairment and presence of infection.

### Model calibration

1  
2  
3 Six of the fourteen externally validated delirium prediction models reported calibration  
4 metrics.<sup>29-31 34 43 45</sup> The reported chi-square statistics were significant in five prognostic models<sup>29-</sup>  
5  
6  
7  
8 <sup>31 34 43</sup> and did not reach significance in one model.<sup>45</sup> Four of the 23 studies that developed  
9  
10 models reported calibration statistics.<sup>32 37 40 42</sup> None of the included studies reported calibration  
11  
12 plots or slopes.

### 14 **Risk of overfitting**

15  
16  
17 Events per variable (EPV) were examined in each of the fourteen externally validated models.  
18  
19 Models estimating more parameters than events in a 1:10 ratio are at risk of statistical overfitting,  
20  
21 potentially leading to overly optimistic model performance.<sup>22 54-57</sup> In 14 models with external  
22  
23 validation, four had fewer than optimum events for the number of parameters estimated in the  
24  
25 development stage of the models.<sup>25 29 30 49</sup> Five had fewer than optimum events in the external  
26  
27 validation stage.<sup>23 29-31 45</sup> Two models did not reach optimum events for the number of  
28  
29 parameters in either the development or the external validation studies.<sup>29 30</sup> Various statistical  
30  
31 techniques such as shrinkage procedures, the use of lasso or penalized regression and internal  
32  
33 validation methods are suggested to counter the effects of lower EPV.<sup>15 54 58</sup> None of the  
34  
35 identified studies report use of statistical shrinkage procedures. Five studies applied internal  
36  
37 validation techniques in the development stage of their model to account for stability within their  
38  
39  
40  
41  
42 model.<sup>24 25 37 38 46</sup>

### 44 **Clinical Utility**

45  
46  
47 Clinical utility of a prediction model may be evaluated through several different statistical  
48  
49 metrics including odds ratios, relative risk, sensitivity and specificity, receiver operator curves, R  
50  
51 squared and integrated discrimination improvement indices as well as the clinical utility curve  
52  
53 statistic and the decision curve analysis.<sup>57 59</sup> Six externally validated delirium prediction model  
54  
55  
56  
57  
58  
59



1  
2  
3 studies reported odds ratios or relative risk statistics evaluating the highest risk stratification cut-  
4 off point.<sup>29-31 34 46 48</sup> Seven studies reported sensitivity and specificity<sup>23 27 33 35 41 43 48</sup> and one  
5  
6 study reported the rate of true positives and false positives.<sup>44</sup> None of the identified studies  
7  
8 reported decision curve analysis or clinical utility curve analysis. While the majority of studies  
9  
10 selected variables that were either routinely used in practice or were feasible to administer, two  
11  
12 studies developed delirium prediction models based on data routinely entered into the electronic  
13  
14 health record to increase feasibility of use.<sup>24 44</sup> Pendlebury et al. (2016) adapted variable  
15  
16 definition and use to match routine clinical assessment while externally validating four delirium  
17  
18 prediction models and creating an additional risk stratification tool.<sup>33 48</sup> Moerman et al. reported  
19  
20 feasibility and reliability statistics following the incorporation of the risk prediction tool into  
21  
22 practice.<sup>41</sup>

## 23 24 25 26 27 28 **DISCUSSION**

29  
30 This review identified moderate predictive ability (AUROC 0.52-0.94) in fourteen externally  
31  
32 validated delirium prediction models with eight out of fourteen models using narrow validation.  
33  
34 However, three main limitations were identified. First, study design, application, and reporting of  
35  
36 statistical methods appear inadequate. Data collection overlapped with the initial diagnosis of  
37  
38 delirium in the highest performing model as well as in two other included studies, likely  
39  
40 exaggerating model performance.<sup>15 27 32 35</sup> Low EPV combined with limited application of  
41  
42 internal validation techniques contributed to an increased risk of bias and likely the creation of  
43  
44 overly optimistic models.<sup>15 50-52</sup> Second, broad variable definitions, particularly in functional and  
45  
46 cognitive abilities, may have led to overlapping data capture. For example, Pendlebury et al.  
47  
48 (2016) demonstrated this possible effect in the development of the *Susceptibility Score*, model  
49  
50 performance did not improve with the addition of functional impairment to a model that already  
51  
52  
53  
54  
55  
56  
57  
58  
59  
60

1  
2  
3 included cognitive impairment and age.<sup>48</sup> Lastly, assessment of the outcome variable, delirium,  
4 was largely non-systematic, once daily, and avoided weekends. In the studies that assessed  
5 delirium more than once per day, the assessment was performed by routine clinical staff,  
6 decreasing consistency. This is a major limitation for an acute condition that fluctuates, may  
7 occur suddenly and is dependent on precise, objective assessment. While case-mix between  
8 populations may impact observed delirium rates, we believe it would be advantageous for future  
9 studies to incorporate systematic, frequent and consistent delirium assessments.

10  
11  
12 As delirium is a multifactorial syndrome representing an interrelationship between premorbid  
13 and precipitating factors,<sup>29</sup> the time course of data collection is important. Nine of the fourteen  
14 externally validated delirium prediction models incorporate precipitating factors into their  
15 predictive model; two models<sup>29 31</sup> are intentionally constructed in this manner. The inclusion of  
16 a precipitating factor into a premorbid delirium prediction model may provide important  
17 predictive power if designed in the appropriate manner, as demonstrated by Inouye et al (1993).<sup>30</sup>  
18  
19 However, if variables are collected after the onset of delirium this would exaggerate model  
20 performance (e.g. ICU admission). As an example, one delirium prediction model has a robust  
21 AUROC of 0.94 (CI 0.91-0.97).<sup>35</sup> This study excluded those with a MMSE <23 and prevalent  
22 delirium. Data collection occurred within the first 24-hours following surgery, however, delirium  
23 assessment began immediately after surgery, with a 50% delirium prevalence on the day of  
24 surgery. This overlap of data collection and delirium assessment likely exaggerated model  
25 performance for this outlier study. Seven externally validated models included data about the  
26 precipitating factor present upon admission and either excluded those with prevalent delirium or  
27 calculated separate AUROCs for prevalent delirium versus incident delirium.<sup>23 30 33 44 48</sup>

28  
29  
30  
31  
32  
33  
34  
35  
36  
37  
38  
39  
40  
41  
42  
43  
44  
45  
46  
47  
48  
49  
50  
51  
52  
53  
54 Model underperformance may be explained by low powered studies, insufficient events per  
55  
56  
57  
58  
59  
60

1  
2  
3 variable (EPV) as well as the use of univariate analyses and stepwise regression to select  
4  
5 predictive variables for inclusion into models. Although these are common methods to use for  
6  
7 model development and may counter the effects of insufficient EPV, each approach has  
8  
9 significant drawbacks.<sup>60</sup> Univariate analysis may reduce predictive ability by inclusion of  
10  
11 variables that are not independent of each other, and stepwise regression disadvantages include  
12  
13 conflation of *p*-values and a biased estimation of coefficients.<sup>15 22 50 61</sup> While EPV was originally  
14  
15 adapted to ensure stability in regression covariates, it has been identified as an important  
16  
17 component to predictive model stability and reproducibility due to the result of overfitting.<sup>15 50 62</sup>  
18  
19 Ogundimu et al. (2016) demonstrate this effect by simulating models with EPV of 2, 5, 10, 15,  
20  
21 20, 25 and 50. Stability of models increased as the EPV increased and models including  
22  
23 predictors with low population prevalence required >20 EPV.<sup>63</sup> The degree of model overfitting  
24  
25 should be assessed through calibration statistics and forms of internal validation such as  
26  
27 bootstrapping. Future studies should consider the use of statistical methods to counter low EPV  
28  
29 including the application of statistical shrinkage techniques and penalised regression using ridge  
30  
31 or lasso regression.<sup>15 22 56 60 64</sup> Further, future studies may benefit from the incorporation of  
32  
33 advanced statistical techniques such as Bayesian Networks and machine learning that have  
34  
35 shown to improve the performance of previous prediction models that were built using standard  
36  
37 logistic regression.<sup>65 66</sup> These methods facilitate the exploration of complex interactions between  
38  
39 risk factors as well as adapt to changing patient conditions, allowing for a dynamic model.  
40  
41  
42 Increasing age, pre-existing cognitive impairment, functional and sensory impairments were the  
43  
44 most frequently used variables in the externally validated delirium prediction models. However,  
45  
46 many studies employed different definition for these variables, making comparisons difficult  
47  
48 between models and limiting generalisability across populations. Functional and physical  
49  
50  
51  
52  
53  
54  
55  
56  
57  
58  
59  
60

1  
2  
3 impairments were broadly defined resulting in the inability to discern whether impairments  
4 resulted from truly physical origins or if the noted decrease in function was related to cognitive  
5 impairment leading to an overlap in data collection. Age may not be a relevant risk factor when  
6 considering an older cohort of patients; for example, a recent study found that global cognition  
7 may mediate the relationship between age and postoperative delirium<sup>67</sup> therefore the inclusion of  
8 age in a delirium prediction model may not add to the overall performance of the model if  
9 cognition is adequately captured or if only elderly patients are included in the study. This effect  
10 was demonstrated by Pendlebury et al. (2016), an improved AUROC resulted when age was  
11 removed from the prediction model (0.81 to 0.84).<sup>48</sup> As the inclusion of age, functional, physical,  
12 and cognitive impairments may result in an overlap of data collection, future models may want to  
13 explore variables that have not been frequently used in delirium prediction yet are highly  
14 predictive of mortality, surgical complications, and depression. An example would be the self-  
15 rated health question. This is a single-item question evaluating an individual's perception of their  
16 own health and has been found to be a significant predictor of subjective memory complaints,  
17 depression and mortality.<sup>68-74</sup> Further, this variable is feasible as it takes minimal time and no  
18 training. Incorporation of variables such as self-rated health may increase both predictive ability  
19 and feasibility thus improving clinical utility.

20  
21  
22  
23  
24  
25  
26  
27  
28  
29  
30  
31  
32  
33  
34  
35  
36  
37  
38  
39  
40  
41  
42 The highest performing delirium prediction model excluded those with pre-existing cognitive  
43 impairment, did not incorporate a cognitive variable and used hearing impairment as a predictive  
44 variable (note the methodological concerns of this study were discussed above).<sup>35</sup> Cognitive  
45 impairment was the most frequently used variable and is a known risk factor for delirium  
46 development.<sup>2 67</sup> Prior research demonstrates individuals with Mild Cognitive Impairment (MCI)  
47 are at a significantly higher risk of delirium development.<sup>75 76</sup> All models used cut-off scores on  
48  
49  
50  
51  
52  
53  
54  
55  
56  
57  
58  
59  
60

1  
2  
3 cognitive tests that would indicate dementia, providing no evaluation of subtler cognitive decline  
4 such as MCI. Furthermore, Jones et al. (2016) demonstrated a strong linear relationship between  
5 risk of delirium and all levels of cognitive function, even those considered unimpaired through  
6 formal testing.<sup>67</sup> In this study, a General Cognitive Performance score was developed using a  
7 complex battery of neuropsychological tests. Unfortunately, the neuropsychological battery is  
8 too complex to be practical for the clinical setting. Fong et al. (2015) found associations between  
9 baseline executive functioning, complex attention and semantic networks to be associated with  
10 subsequent delirium development<sup>77</sup>. The inclusion of MCI, or simple cognitive tests as employed  
11 by Fong et al. (2015), as a variable may increase the detection and prevalence of cognitive  
12 impairment as a variable thus increasing its predictive power. Further exploration into isolated  
13 cognitive tests that are feasible to administer in a clinical setting as well as sensitive to the  
14 spectrum of cognitive impairment may enhance delirium prediction.

15  
16  
17  
18  
19  
20  
21  
22  
23  
24  
25  
26  
27  
28  
29  
30  
31 The clinical utility of a prediction model is dependent on both its efficacy at predicting those at  
32 risk and feasibility hence both must be considered when building and validating a model.  
33 Clinical utility is compromised by efficacious models that are not feasible. Conversely, a feasible  
34 model that is not effective at identifying those at risk also lacks clinical utility. To this end,  
35 model derivation must focus on building an effective model. The next aspect that must be  
36 considered is the ability to enhance clinical care. Predicting individuals at high risk is clearly  
37 important, but to an experienced clinician, delirium may already be anticipated. Maximum value  
38 may be obtained by aiding in prediction of moderate risk patients, where the risk of delirium may  
39 be more ambiguous.

### 40 41 42 43 44 45 46 47 48 49 50 51 **Strengths and weaknesses of this study**

52 This systematic review benefitted from a prospectively developed protocol. A comprehensive  
53  
54  
55  
56  
57

1  
2  
3 literature search from multiple databases using broad search terms yielded twenty-seven studies  
4  
5 with fourteen externally validated delirium prediction models. Our author team is  
6  
7 interprofessional, providing the opportunity for different perspectives on model evaluation.  
8  
9  
10 Further, this review synthesizes evidence from both medical and surgical populations while  
11  
12 providing statistical-based recommendations for study and model design for future delirium  
13  
14 prediction model studies.  
15

16  
17 The limitations of this systematic review may be that articles focused on a younger population  
18  
19 were not included. This limitation could narrow the generalisability of the results of this  
20  
21 systematic review to the broader population however delirium predominantly affects older  
22  
23 adults. Further, this review is limited by population focus. We did not include prediction models  
24  
25 built in palliative care, long-term care facilities, or the emergency department.  
26  
27

### 28 **Strengths and weaknesses in relation to other studies**

29  
30  
31 Past systematic reviews concluded that the identified delirium prediction models were largely  
32  
33 heterogeneous in variable inclusion and were not sufficiently developed for incorporation into  
34  
35 practice.<sup>78-80</sup> Recommendations include further testing on existing delirium prediction models  
36  
37 followed by integration in practice as well as further exploration into measurements that are  
38  
39 feasible clinically. This review included eight models not previously identified in past systematic  
40  
41 reviews of delirium prediction models. Further this review is the first to identify study and  
42  
43 model design issues and discusses the paucity of measurements sensitive to the spectrum of  
44  
45 cognitive impairment.  
46  
47  
48

### 49 **Implications and future research**

50  
51 Two avenues may be pursued for future studies. The first avenue involves model aggregation;  
52  
53 currently available delirium prediction models would be combined into a meta-model through  
54  
55  
56  
57  
58  
59  
60

1  
2  
3 stacked regression in a new cohort of participants. This method would update currently published  
4 models to a new population, furthering generalizability and bolstering broad external  
5 validation.<sup>81</sup> Variable definition could be harmonized in the meta-model with the intention to use  
6 variables that are readily available and feasible for routine practice. This method would further  
7 delirium prediction for those with dementia-level pre-existing cognitive impairment as well as  
8 examine the individual contributions of functional impairment due to physical conditions,  
9 cognitive impairment or age through model re-fitting. Nonetheless, a future meta-model would  
10 continue presently identified limitations such as exclusion of the spectrum of cognition. The  
11 second avenue should focus on the development and broad validation of delirium prediction  
12 models exploring the use of simple cognitive tests that would be inclusive to mild cognitive  
13 impairment and sensitive to the spectrum of cognition. Further, future models should consider  
14 development of dynamic predictive models using advanced statistical methods such as Bayesian  
15 Networks, artificial intelligence, and machine learning as these methods have shown to improve  
16 models built using standard logistic regression.<sup>66 82</sup>

17  
18  
19 We suggest the following broad principles for use in future studies: (1) Delirium prediction  
20 models should be developed only using data available prior to the onset of delirium and likely  
21 should be focused in specific populations depending on whether the precipitating event has  
22 occurred or not; (2) should include structured, twice daily assessment (regardless of weekends)  
23 using validated tools and trained research staff to identify delirium; (3) should consider inclusion  
24 of variables and assessments that are readily available in clinical practice and are feasible to  
25 administer without extensive training or interpretation where possible and not to exclude a more  
26 informative variable; (4) model development and validation should follow rigorous methods  
27 outlined by Steyerberg (2009)<sup>22</sup> and Steyerberg and Vergouwe (2014)<sup>56</sup> including strategies to

1  
2  
3 counter low sample size and overly optimistic model performance, the use of Akaike Information  
4 Criterion (AIC) and Bayesian Information Criterion (BIC) to assess model fit, and consider  
5 broad validations to expand case-mix and generalizability; and (5) adhere to strict guidelines as  
6 outlined by The TRIPOD Statement for statistical performance reporting including calibration  
7 and clinical utility statistics.<sup>22 50-52 56 59</sup>

8  
9  
10 Two classes of delirium prediction models may be required, based on the acuity of the admission  
11 (elective or emergency). If precipitating factors are included in an elective admission delirium  
12 prediction model, where the patient is yet to incur the delirium provoking event, an individual's  
13 delirium risk may be overestimated. In the second option, inclusion of only premorbid factors  
14 may underestimate delirium risk given the emergency clinical scenario.

## 25 26 **Conclusion**

27  
28 Twenty-three delirium prediction models were identified. Fourteen of these were externally  
29 validated and three were internally validated. Of the fourteen validated delirium prediction  
30 models, the overall predictive ability is moderate with an AUROC range from 0.52-0.94.  
31 Assessment of the outcome variable, delirium, is often non-systematic and future studies would  
32 be improved with more standardized and frequent assessment. Overall, the variable inclusion and  
33 applied definitions in delirium prediction models are heterogeneous making comparisons  
34 difficult. To improve delirium prediction models, future models should consider using standard  
35 variables and definitions to work towards a prediction tool that is generalizable to several  
36 populations within the remit of understanding the relationship with the precipitating event.

## 37 38 39 **Contributors**

40  
41 HL and SP with the mentorship of RDS formulated the aim, developed the study protocol,  
42 completed the search and extracted the data. HL and RDS synthesized the data. HL with the  
43  
44  
45  
46  
47  
48



1  
2  
3 mentorship of RDS drafted the manuscript and designed the tables. RB designed the figures and  
4  
5 assisted with statistical interpretation. LB provided expertise on content related to cognition and  
6  
7 reviewed the manuscript. DD and CMC assisted with synthesis and interpretation of results and  
8  
9 discussion in relation to their expertise in geriatrics, cognition, and delirium. MC, MM, MTVC,  
10  
11 and PP assisted with synthesis of results and discussion section, providing expertise in delirium  
12  
13 in its respective settings.  
14  
15

### 16 17 **Declaration of Interests**

18  
19 All authors have completed ICMJE disclosure forms and no conflicts of interest are declared.  
20

### 21 22 **Data Sharing Statement**

23  
24 Complete search results including excluded studies and CHARMS Risk of Bias checklist  
25  
26 decision tree available from corresponding author upon request.  
27

### 28 29 **Acknowledgements**

30  
31 HL and RDS acknowledge funding support from the Department of Anesthesiology at University  
32  
33 of Wisconsin-Madison. RDS acknowledges funding support from K23 AG055700. PP  
34  
35 acknowledges funding support from R01 NHLBI (HL111111) and research grant from Hospira  
36  
37 Inc. in collaboration with NIH. We would like to express our sincere gratitude for the assistance  
38  
39 of Mary Hitchcock in Ebling Health Sciences Library in the design of the search strategy and  
40  
41 Dave Dwyer and Lily Turner for their assistance with proofreading the manuscript.  
42  
43

### 44 45 **Figure Legends**

46  
47 Figure 1: No legend  
48

49 Figure 2: Figure 2 displays the CHARMS Risk of Bias assessment on all included studies.

50 Study Participants: design of included study, sampling method, inclusion/exclusion  
51 criteria  
52

53 Predictors: definition, timing and measurement

54 Outcome: definition, timing and measurement

55 Sample Size and Missing Data: number of participants in study, events per variable,  
56  
57

1  
2  
3 missing data

4 Statistical Analysis: Selection of predictors, internal validation, type of external  
5 validation  
6  
7

8 Figure 3: Figure 3 displays the mean frequency of variable use in the fourteen externally  
9 validated

10 delirium prediction models

11 (P) indicated a precipitating risk factor used in a delirium prediction model

12 The following variables were used twice and are not represented in the figure: BUN/Cr  
13 ratio, comorbidities, history of delirium, depression, medications (1-upon admission, 1-  
14 added during hospital stay), restraint use, and malnutrition (1-altered albumin level, 1-  
15 malnutrition scale).

16 The following variables were used once and are not represented in the figure: bladder  
17 catheter use, C-Reactive Protein, emergency surgery, presence of fracture on admission,  
18 history of cerebrovascular accident, iatrogenic event, intensive care unit admission, and  
19 open surgery.  
20  
21

22  
23 Figure 4: Figure 4 shows the published AUROC statistic for the 14 externally validated Delirium  
24 Prediction Models

25 **#D/N**: Number of confirmed delirium in study/overall sample size

26 **DPM**: Delirium prediction model name. The corresponding number of references the  
27 different AUROCs calculated based on different cognitive tests applied to the model by  
28 the authors.

29 **Squares w/error bars**: Size of square corresponds to sample size of study

30 **AUROC**: Reported Area Under the Receiver Curve Statistic, 95% Confidence Intervals  
31  
32  
33  
34  
35  
36  
37  
38  
39  
40  
41  
42  
43  
44  
45  
46  
47  
48  
49  
50  
51  
52  
53  
54  
55  
56  
57  
58  
59  
60

## References

1. Sanders RD, Pandharipande PP, Davidson AJ, et al. Anticipating and managing postoperative delirium and cognitive decline in adults. *BMJ: British Medical Journal (Overseas & Retired Doctors Edition)* 2011;343(7816):197-200 4p. doi: 10.1136/bmj.d4331
2. Inouye SK, Westendorp RG, Saczynski JS. Delirium in elderly people. *Lancet* 2014;383(9920):911-22. doi: 10.1016/s0140-6736(13)60688-1
- 10.1016/S0140-6736(13)60688-1. Epub 2013 Aug 28.</p>
3. Ryan DJ, O'Regan NA, Caoimh RÓ, et al. Delirium in an adult acute hospital population: predictors, prevalence and detection. *BMJ Open* 2013;3(1) doi: 10.1136/bmjopen-2012-001772
4. Pandharipande PP, Girard TD, Jackson JC, et al. Long-Term Cognitive Impairment after Critical Illness. *The New England journal of medicine* 2013;369(14):1306-16. doi: 10.1056/NEJMoa1301372
5. Leslie DL, Inouye SK. The importance of delirium: economic and societal costs. *J Am Geriatr Soc* 2011;59 Suppl 2:S241-3. doi: 10.1111/j.1532-5415.2011.03671.x [published Online First: 2011/12/07]
6. Han JH, Brummel NE, Chandrasekhar R, et al. Exploring Delirium's Heterogeneity: Association Between Arousal Subtypes at Initial Presentation and 6-Month Mortality in Older Emergency Department Patients. *Am J Geriatr Psychiatry* 2016 doi: 10.1016/j.jagp.2016.05.016 [published Online First: 2016/09/14]
7. Pollard C, Fitzgerald M, Ford K. Delirium: The lived experience of older people who are delirious post-orthopaedic surgery. *International Journal of Mental Health Nursing* 2015;24(3):213-21. doi: 10.1111/inm.12132
8. Gleason LJ, Schmitt EM, Kosar CM, et al. Effect of Delirium and Other Major Complications on Outcomes After Elective Surgery in Older Adults. *JAMA surgery* 2015;150(12):1134-40. doi: 10.1001/jamasurg.2015.2606
9. Robinson TN, Raeburn CD, Tran ZV, et al. Postoperative delirium in the elderly: risk factors and outcomes. *Ann Surg* 2009;249(1):173-8. doi: 10.1097/SLA.0b013e31818e4776 [published Online First: 2008/12/25]
10. Adams ST, Leveson SH. Clinical prediction rules. *BMJ (Clinical research ed)* 2012;344
11. Reilly BM, Evans AT. Translating clinical research into clinical practice: impact of using prediction rules to make decisions. *Annals of internal medicine* 2006;144(3):201-09.
12. Moons KGM, Kengne AP, Woodward M, et al. Risk prediction models: I. Development, internal validation, and assessing the incremental value of a new (bio)marker. *Heart (British Cardiac Society)* 2012;98(9):683-90. doi: 10.1136/heartjnl-2011-301246
13. Debray TPA, Moons KGM, Ahmed I, et al. A framework for developing, implementing, and evaluating clinical prediction models in an individual participant data meta-analysis. *Statistics in medicine* 2013;32(18):3158-80. doi: 10.1002/sim.5732

14. Hayhurst CJ, Pandharipande PP, Hughes CG. Intensive Care Unit Delirium: A Review of Diagnosis, Prevention, and Treatment. *Anesthesiology* 2016;125(6):1229-41. doi: 10.1097/ALN.0000000000001378
15. Moons KG, de Groot JA, Bouwmeester W, et al. Critical appraisal and data extraction for systematic reviews of prediction modelling studies: the CHARMS checklist. *PLoS Med* 2014;11(10):e1001744. doi: 10.1371/journal.pmed.1001744 [published Online First: 2014/10/15]
16. Moher D, Liberati A, Tetzlaff J, et al. Preferred reporting items for systematic reviews and meta-analyses: the PRISMA statement. *Int J Surg* 2010;8(5):336-41. doi: 10.1016/j.ijsu.2010.02.007 [published Online First: 2010/02/23]
17. Nations U. Ageing 2016 [Available from: <http://www.un.org/en/sections/issues-depth/ageing/index.html>] accessed March 7th 2017.
18. Centers for Disease C. Elder Abuse: Definitions 2016 [Available from: <https://www.cdc.gov/violenceprevention/elderabuse/definitions.html>] accessed March 7th 2017.
19. Barr J, Fraser GL, Puntillo K, et al. Clinical practice guidelines for the management of pain, agitation, and delirium in adult patients in the intensive care unit. *Crit Care Med* 2013;41(1):263-306. doi: 10.1097/CCM.0b013e3182783b72 [published Online First: 2012/12/28]
20. Hui D, Frisbee-Hume S, Wilson A, et al. Effect of Lorazepam With Haloperidol vs Haloperidol Alone on Agitated Delirium in Patients With Advanced Cancer Receiving Palliative Care: A Randomized Clinical Trial. *Jama* 2017;318(11):1047-56. doi: 10.1001/jama.2017.11468 [published Online First: 2017/10/05]
21. Well GA, Shea, B., O'Connell, J.P., Welch, V., Losos, M., Tugwell, P. The Newcastle-Ottawa Scale (NOS) for assessing the quality of nonrandomised studies in meta-analyses Ottawa: Ottawa Hospital; 2014 [Available from: [http://www.ohri.ca/programs/clinical\\_epidemiology/oxford.asp](http://www.ohri.ca/programs/clinical_epidemiology/oxford.asp)] accessed 05-31 2016.
22. Steyerberg EW. Clinical prediction models : a practical approach to development, validation, and updating: New York : Springer, [2009] ©2009 2009.
23. Carrasco MP, Villarroel L, Andrade M, et al. Development and validation of a delirium predictive score in older people. *Age Ageing* 2014;43(3):346-51. doi: 10.1093/ageing/aft141 [published Online First: 2013/09/26]
24. de Wit HAJM, Winkens B, Mestres Gonzalvo C, et al. The development of an automated ward independent delirium risk prediction model. *International journal of clinical pharmacy* 2016 doi: 10.1007/s11096-016-0312-7
25. Douglas VC, Hessler CS, Dhaliwal G, et al. The AWOL tool: derivation and validation of a delirium prediction rule. *J Hosp Med* 2013;8(9):493-9. doi: 10.1002/jhm.2062 [published Online First: 2013/08/08]
26. Fisher BW, Flowerdew G. A simple model for predicting postoperative delirium in older patients undergoing elective orthopedic surgery. *J Am Geriatr Soc* 1995;43(2):175-8. [published Online First: 1995/02/01]
27. Freter S, Dunbar M, Koller K, et al. Risk of Pre-and Post-Operative Delirium and the Delirium Elderly At Risk (DEAR) Tool in Hip Fracture Patients. *Canadian geriatrics journal : CGJ* 2015;18(4):212-16. doi: 10.5770/cgj.18.185
28. Freter SH, Dunbar MJ, MacLeod H, et al. Predicting post-operative delirium in elective orthopaedic patients: the Delirium Elderly At-Risk (DEAR) instrument. *Age And Ageing* 2005;34(2):169-71.
29. Inouye SK, Charpentier PA. Precipitating factors for delirium in hospitalized elderly persons. Predictive model and interrelationship with baseline vulnerability. *Jama* 1996;275(11):852-7. [published Online First: 1996/03/20]

- 1
- 2
- 3
- 4 30. Inouye SK, Viscoli CM, Horwitz RI, et al. A predictive model for delirium in hospitalized elderly
- 5 medical patients based on admission characteristics. *Ann Intern Med* 1993;119(6):474-81.
- 6 [published Online First: 1993/09/15]
- 7 31. Inouye SK, Zhang Y, Jones RN, et al. Risk factors for delirium at discharge: development and
- 8 validation of a predictive model. *Arch Intern Med* 2007;167(13):1406-13. doi:
- 9 10.1001/archinte.167.13.1406 [published Online First: 2007/07/11]
- 10 32. Isfandiatty R, Harimurti K, Setiati S, et al. Incidence and predictors for delirium in hospitalized elderly
- 11 patients: a retrospective cohort study. *Acta Med Indones* 2012;44(4):290-7. [published Online
- 12 First: 2013/01/15]
- 13 33. Pendlebury ST, Lovett N, Smith SC, et al. Delirium risk stratification in consecutive unselected
- 14 admissions to acute medicine: validation of externally derived risk scores. *Age and ageing*
- 15 2016;45(1):60-65. doi: 10.1093/ageing/afv177
- 16 34. Kalisvaart KJ, Vreeswijk R, de Jonghe JF, et al. Risk factors and prediction of postoperative delirium in
- 17 elderly hip-surgery patients: implementation and validation of a medical risk factor model. *J Am*
- 18 *Geriatr Soc* 2006;54(5):817-22. doi: 10.1111/j.1532-5415.2006.00704.x [published Online First:
- 19 2006/05/16]
- 20 35. Kim MY, Park UJ, Kim HT, et al. DELirium Prediction Based on Hospital Information (Delphi) in
- 21 General Surgery Patients. *Medicine* 2016;95(12):e3072. doi: 10.1097/MD.0000000000003072
- 22 36. Korc-Grodzicki B, Sun SW, Zhou Q, et al. Geriatric Assessment as a Predictor of Delirium and Other
- 23 Outcomes in Elderly Patients With Cancer. *Ann Surg* 2014 doi: 10.1097/sla.0000000000000742
- 24 [published Online First: 2014/06/03]
- 25 37. Leung JM, Sands LP, Lim E, et al. Does preoperative risk for delirium moderate the effects of
- 26 postoperative pain and opiate use on postoperative delirium? *Am J Geriatr Psychiatry*
- 27 2013;21(10):946-56. doi: 10.1016/j.jagp.2013.01.069 [published Online First: 2013/05/11]
- 28 38. Liang C-K, Chu C-L, Chou M-Y, et al. Developing a Prediction Model for Post-Operative Delirium and
- 29 Long-Term Outcomes Among Older Patients Receiving Elective Orthopedic Surgery: A
- 30 Prospective Cohort Study in Taiwan. *Rejuvenation research* 2015;18(4):347-55. doi:
- 31 10.1089/rej.2014.1645
- 32 39. Maekawa Y, Sugimoto K, Yamasaki M, et al. Comprehensive Geriatric Assessment is a useful
- 33 predictive tool for postoperative delirium after gastrointestinal surgery in old-old adults.
- 34 *Geriatrics & gerontology international* 2015 doi: 10.1111/ggi.12587
- 35 40. Martinez JA, Belastegui A, Basabe I, et al. Derivation and validation of a clinical prediction rule for
- 36 delirium in patients admitted to a medical ward: an observational study. *BMJ Open* 2012;2(5)
- 37 doi: 10.1136/bmjopen-2012-001599 [published Online First: 2012/09/18]
- 38 41. Moerman S, Tuinebreijer WE, de Boo M, et al. Validation of the Risk Model for Delirium in hip
- 39 fracture patients. *Gen Hosp Psychiatry* 2012;34(2):153-9. doi:
- 40 10.1016/j.genhosppsych.2011.11.011 [published Online First: 2012/01/10]
- 41 42. O'Keefe ST, Lavan JN. Predicting delirium in elderly patients: development and validation of a risk-
- 42 stratification model. *Age Ageing* 1996;25(4):317-21. [published Online First: 1996/07/01]
- 43 43. Pompei P, Foreman M, Rudberg MA, et al. Delirium in hospitalized older persons: outcomes and
- 44 predictors. *J Am Geriatr Soc* 1994;42(8):809-15. [published Online First: 1994/08/01]
- 45 44. Rudolph JL, Doherty K, Kelly B, et al. Validation of a Delirium Risk Assessment Using Electronic
- 46 Medical Record Information. *Journal of the American Medical Directors Association*
- 47 2016;17(3):244-48 5p. doi: 10.1016/j.jamda.2015.10.020
- 48 45. Rudolph JL, Harrington MB, Lucatorto MA, et al. Validation of a medical record-based delirium risk
- 49 assessment. *Journal of the American Geriatrics Society* 2011;59 Suppl 2:S289-94. doi:
- 50 10.1111/j.1532-5415.2011.03677.x
- 51
- 52
- 53
- 54
- 55
- 56
- 57
- 58
- 59

- 1  
2  
3 46. Rudolph JL, Jones RN, Levkoff SE, et al. Derivation and validation of a preoperative prediction rule for  
4 delirium after cardiac surgery. *Circulation* 2009;119(2):229-36 8p. doi:  
5 10.1161/CIRCULATIONAHA.108.795260
- 6  
7 47. Dworkin A, Lee DS, An AR, et al. A Simple Tool to Predict Development of Delirium After Elective  
8 Surgery. *J Am Geriatr Soc* 2016;64(11):e149-e53. doi: 10.1111/jgs.14428 [published Online First:  
9 2016/09/22]
- 10  
11 48. Pendlebury ST, Lovett NG, Smith SC, et al. Delirium risk stratification in consecutive unselected  
12 admissions to acute medicine: validation of a susceptibility score based on factors identified  
13 externally in pooled data for use at entry to the acute care pathway. *Age Ageing* 2016 doi:  
14 10.1093/ageing/afw198 [published Online First: 2016/11/07]
- 15  
16 49. Freter SH, George J, Dunbar MJ, et al. Prediction of delirium in fractured neck of femur as part of  
17 routine preoperative nursing care. *Age Ageing* 2005;34(4):387-8. doi: 10.1093/ageing/afi099  
18 [published Online First: 2005/06/16]
- 19  
20 50. Collins GS, Reitsma JB, Altman DG, et al. Transparent reporting of a multivariable prediction model  
21 for individual prognosis or diagnosis (TRIPOD): the TRIPOD statement. *Bmj* 2015;350:g7594. doi:  
22 10.1136/bmj.g7594 [published Online First: 2015/01/09]
- 23  
24 51. Moons KG, Altman DG, Reitsma JB, et al. New Guideline for the Reporting of Studies Developing,  
25 Validating, or Updating a Multivariable Clinical Prediction Model: The TRIPOD Statement. *Adv  
26 Anat Pathol* 2015;22(5):303-5. doi: 10.1097/pap.000000000000072 [published Online First:  
27 2015/08/12]
- 28  
29 52. Moons KG, Altman DG, Reitsma JB, et al. Transparent Reporting of a multivariable prediction model  
30 for Individual Prognosis or Diagnosis (TRIPOD): explanation and elaboration. *Ann Intern Med*  
31 2015;162(1):W1-73. doi: 10.7326/m14-0698 [published Online First: 2015/01/07]
- 32  
33 53. Vergouwe Y, Moons KG, Steyerberg EW. External validity of risk models: Use of benchmark values to  
34 disentangle a case-mix effect from incorrect coefficients. *Am J Epidemiol* 2010;172(8):971-80.  
35 doi: 10.1093/aje/kwq223 [published Online First: 2010/09/03]
- 36  
37 54. Austin PC, Steyerberg EW. Events per variable (EPV) and the relative performance of different  
38 strategies for estimating the out-of-sample validity of logistic regression models. *Statistical  
39 Methods in Medical Research*;0(0):0962280214558972. doi: doi:10.1177/0962280214558972
- 40  
41 55. Steyerberg EW, Harrell FE, Jr. Prediction models need appropriate internal, internal-external, and  
42 external validation. *J Clin Epidemiol* 2016;69:245-7. doi: 10.1016/j.jclinepi.2015.04.005  
43 [published Online First: 2015/05/20]
- 44  
45 56. Steyerberg EW, Vergouwe Y. Towards better clinical prediction models: seven steps for development  
46 and an ABCD for validation. *Eur Heart J* 2014;35(29):1925-31. doi: 10.1093/eurheartj/ehu207  
47 [published Online First: 2014/06/06]
- 48  
49 57. Steyerberg EW, Vickers AJ, Cook NR, et al. Assessing the performance of prediction models: a  
50 framework for traditional and novel measures. *Epidemiology* 2010;21(1):128-38. doi:  
51 10.1097/EDE.0b013e3181c30fb2 [published Online First: 2009/12/17]
- 52  
53 58. Peduzzi P, Concato J, Kemper E, et al. A simulation study of the number of events per variable in  
54 logistic regression analysis. *J Clin Epidemiol* 1996;49(12):1373-9. [published Online First:  
55 1996/12/01]
- 56  
57 59. Campbell DJ. The clinical utility curve: a proposal to improve the translation of information provided  
58 by prediction models to clinicians. *BMC Res Notes* 2016;9:219. doi: 10.1186/s13104-016-2028-0  
59 [published Online First: 2016/04/16]
- 60  
61 60. Pavlou M, Ambler G, Seaman SR, et al. How to develop a more accurate risk prediction model when  
62 there are few events. *Bmj* 2015;351:h3868. doi: 10.1136/bmj.h3868 [published Online First:  
63 2015/08/13]

- 1  
2  
3 61. Grobman WA, Stamilio DM. Methods of clinical prediction. *Am J Obstet Gynecol* 2006;194(3):888-94.  
4 doi: 10.1016/j.ajog.2005.09.002 [published Online First: 2006/03/09]
- 5 62. Subramanian J, Simon R. Overfitting in prediction models - is it a problem only in high dimensions?  
6 *Contemp Clin Trials* 2013;36(2):636-41. doi: 10.1016/j.cct.2013.06.011 [published Online First:  
7 2013/07/03]
- 8 63. Ogundimu EO, Altman DG, Collins GS. Adequate sample size for developing prediction models is not  
9 simply related to events per variable. *J Clin Epidemiol* 2016;76:175-82. doi:  
10 10.1016/j.jclinepi.2016.02.031 [published Online First: 2016/03/12]
- 11 64. Steyerberg EW, Eijkemans MJ, Harrell FE, Jr., et al. Prognostic modeling with logistic regression  
12 analysis: in search of a sensible strategy in small data sets. *Med Decis Making* 2001;21(1):45-56.  
13 doi: 10.1177/0272989x0102100106 [published Online First: 2001/02/24]
- 14 65. Strobl AN, Vickers AJ, Van Calster B, et al. Improving patient prostate cancer risk assessment: Moving  
15 from static, globally-applied to dynamic, practice-specific risk calculators. *J Biomed Inform*  
16 2015;56:87-93. doi: 10.1016/j.jbi.2015.05.001 [published Online First: 2015/05/20]
- 17 66. Weng SF, Reys J, Kai J, et al. Can machine-learning improve cardiovascular risk prediction using  
18 routine clinical data? *PLoS One* 2017;12(4):e0174944. doi: 10.1371/journal.pone.0174944  
19 [published Online First: 2017/04/05]
- 20 67. Jones RN, Marcantonio ER, Saczynski JS, et al. Preoperative Cognitive Performance Dominates Risk  
21 for Delirium Among Older Adults. *J Geriatr Psychiatry Neurol* 2016 doi:  
22 10.1177/0891988716666380 [published Online First: 2016/09/21]
- 23 68. Christian LM, Glaser R, Porter K, et al. Poorer self-rated health is associated with elevated  
24 inflammatory markers among older adults. *Psychoneuroendocrinology* 2011;36(10):1495-504.  
25 doi: 10.1016/j.psyneuen.2011.04.003 [published Online First: 2011/05/24]
- 26 69. Haring R, Feng YS, Moock J, et al. Self-perceived quality of life predicts mortality risk better than a  
27 multi-biomarker panel, but the combination of both does best. *BMC Med Res Methodol*  
28 2011;11:103. doi: 10.1186/1471-2288-11-103 [published Online First: 2011/07/14]
- 29 70. Moore RC, Eyler LT, Mausbach BT, et al. Complex interplay between health and successful aging: role  
30 of perceived stress, resilience, and social support. *Am J Geriatr Psychiatry* 2015;23(6):622-32.  
31 doi: 10.1016/j.jagp.2014.08.004 [published Online First: 2014/09/14]
- 32 71. Arnberg FK, Lekander M, Morey JN, et al. Self-rated health and interleukin-6: Longitudinal  
33 relationships in older adults. *Brain Behav Immun* 2016;54:226-32. doi:  
34 10.1016/j.bbi.2016.02.008 [published Online First: 2016/02/14]
- 35 72. Falk H, Skoog I, Johansson L, et al. Self-rated health and its association with mortality in older adults  
36 in China, India and Latin America-a 10/66 Dementia Research Group study. *Age Ageing*  
37 2017;46(6):932-39. doi: 10.1093/ageing/afx126 [published Online First: 2017/10/07]
- 38 73. Woo H, Zajacova A. Predictive Strength of Self-Rated Health for Mortality Risk Among Older Adults in  
39 the United States: Does It Differ by Race and Ethnicity? *Res Aging* 2017;39(7):879-905. doi:  
40 10.1177/0164027516637410 [published Online First: 2016/03/20]
- 41 74. Yates JA, Clare L, Woods RT. What is the Relationship between Health, Mood, and Mild Cognitive  
42 Impairment? *J Alzheimers Dis* 2017;55(3):1183-93. doi: 10.3233/jad-160611 [published Online  
43 First: 2016/10/30]
- 44 75. Kazmierski J, Banys A, Latek J, et al. Mild Cognitive Impairment with Associated Inflammatory and  
45 Cortisol Alterations as Independent Risk Factor for Postoperative Delirium. *Dementia & Geriatric  
46 Cognitive Disorders* 2014;38(1/2):65-78 14p. doi: 10.1159/000357454
- 47 76. Veliz-Reissmüller G, Agüero Torres H, van der Linden J, et al. Pre-operative mild cognitive  
48 dysfunction predicts risk for post-operative delirium after elective cardiac surgery. *Aging Clinical  
49 And Experimental Research* 2007;19(3):172-77.

- 1  
2  
3 77. Fong TG, Hshieh TT, Wong B, et al. Neuropsychological profiles of an elderly cohort undergoing  
4 elective surgery and the relationship between cognitive performance and delirium. *Journal of*  
5 *the American Geriatrics Society* 2015;63(5):977-82. doi: 10.1111/jgs.13383  
6  
7 78. van Meenen LC, van Meenen DM, de Rooij SE, et al. Risk prediction models for postoperative  
8 delirium: a systematic review and meta-analysis. *J Am Geriatr Soc* 2014;62(12):2383-90. doi:  
9 10.1111/jgs.13138  
10  
11 10.1111/jgs.13138.</p>  
12 79. Newman MW, O'Dwyer LC, Rosenthal L. Predicting delirium: A review of risk-stratification models.  
13 *General Hospital Psychiatry* 2015;37(5):408-13. doi: 10.1016/j.genhosppsych.2015.05.003  
14 80. Campaner CP. Valoración del riesgo de delirium en pacientes mayores hospitalizados. = Delirium risk  
15 assessment in elderly hospitalized patients. *Revista Española de Geriatria y Gerontología*  
16 2010;45(5):285-90. doi: 10.1016/j.regg.2010.03.011  
17 81. Debray TP, Koffijberg H, Nieboer D, et al. Meta-analysis and aggregation of multiple published  
18 prediction models. *Stat Med* 2014;33(14):2341-62. doi: 10.1002/sim.6080 [published Online  
19 First: 2014/04/23]  
20 82. Kim SY, Moon SK, Jung DC, et al. Pre-operative prediction of advanced prostatic cancer using clinical  
21 decision support systems: accuracy comparison between support vector machine and artificial  
22 neural network. *Korean J Radiol* 2011;12(5):588-94. doi: 10.3348/kjr.2011.12.5.588 [published  
23 Online First: 2011/09/20]  
24  
25  
26  
27  
28  
29  
30  
31  
32  
33  
34  
35  
36  
37  
38  
39  
40  
41  
42  
43  
44  
45  
46  
47  
48  
49  
50  
51  
52  
53  
54  
55  
56  
57  
58  
59  
60



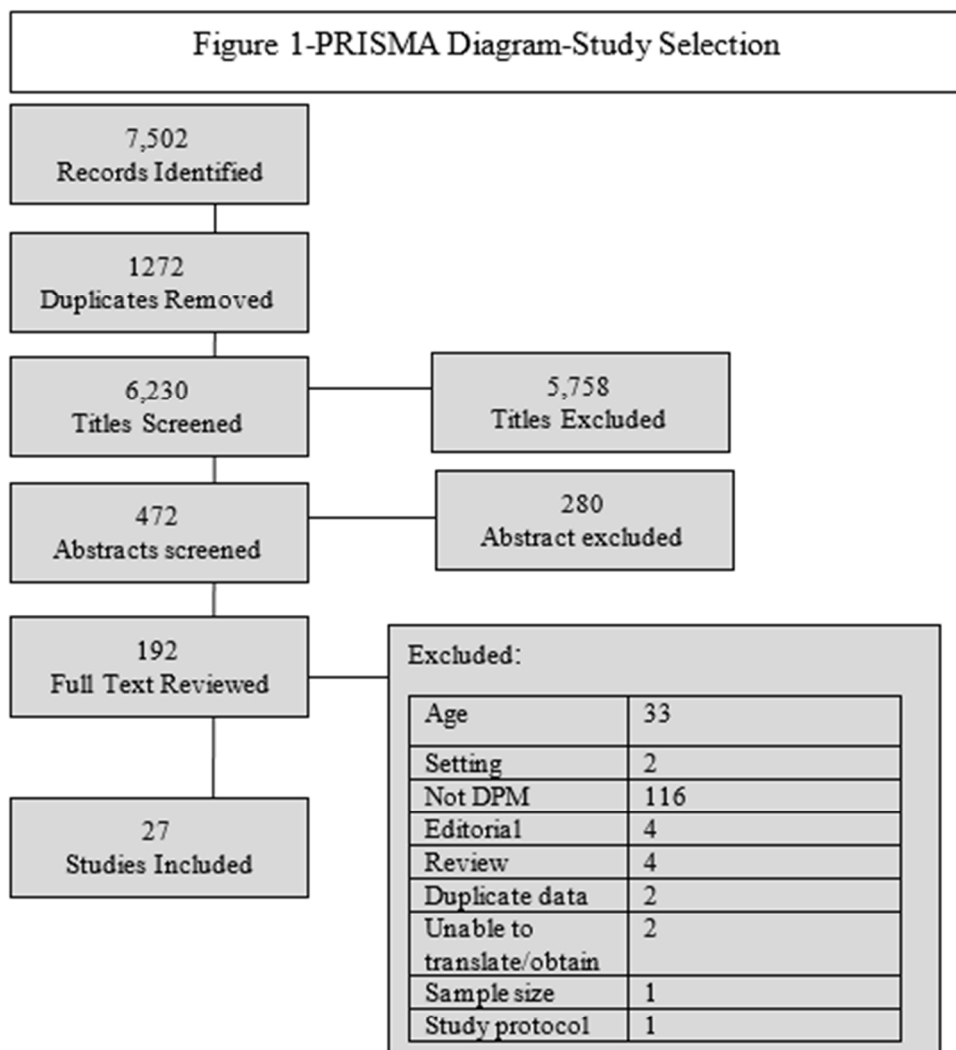

Figure 1: PRISMA Diagram - Study Selection

128x145mm (300 x 300 DPI)

**Figure 2: CHARMS Risk of Bias Assessment**

|                          |                    |            |         |                              |                      |
|--------------------------|--------------------|------------|---------|------------------------------|----------------------|
| Carrasco 2014            | +                  | +          | +       | -                            | -                    |
| De Wit 2016              | ?                  | -          | -       | +                            | +                    |
| Douglas                  | +                  | +          | +       | +                            | +                    |
| Dworkin                  | +                  | +          | +       | ?                            | -                    |
| Fisher and Flowerdew '95 | +                  | +          | +       | -                            | -                    |
| Freter 2005              | +                  | +          | +       | -                            | -                    |
| Freter 2005              | +                  | +          | +       | -                            | -                    |
| Freter 2015              | +                  | ?          | +       | +                            | +                    |
| Inouye & Charpentier '96 | +                  | +          | +       | +                            | +                    |
| Inouye 2007              | +                  | +          | +       | ?                            | +                    |
| Inouye 1993              | +                  | +          | +       | +                            | +                    |
| Isfandiatty 2012         | -                  | -          | -       | +                            | ?                    |
| Kalisvaart 2006          | +                  | +          | +       | +                            | +                    |
| Kim 2016                 | +                  | -          | +       | +                            | +                    |
| Korc-Grodzicki 2014      | -                  | +          | +       | +                            | -                    |
| Leung 2013               | +                  | +          | +       | +                            | +                    |
| Liang 2015               | +                  | +          | +       | ?                            | +                    |
| Maekawa 2015             | ?                  | +          | +       | +                            | -                    |
| Martinez 2012            | +                  | +          | +       | +                            | ?                    |
| Moerman 2012             | +                  | +          | ?       | +                            | ?                    |
| O'Keeffe & Lavan 1996    | +                  | +          | ?       | -                            | ?                    |
| Pendlebury 2016          | +                  | +          | +       | +                            | +                    |
| Pendlebury 2016          | +                  | +          | +       | +                            | +                    |
| Pompei 1994              | ?                  | +          | +       | +                            | ?                    |
| Rudolph 2009             | ?                  | +          | +       | +                            | +                    |
| Rudolph 2011             | +                  | +          | +       | -                            | +                    |
| Rudolph 2016             | +                  | +          | +       | +                            | +                    |
|                          | Study Participants | Predictors | Outcome | Sample size and Missing data | Statistical Analysis |

Figure 2 displays the CHARMS Risk of Bias assessment on all included studies.  
Study Participants: design of included study, sampling method, inclusion/exclusion criteria  
Predictors: definition, timing, and measurement  
Outcome: definition, timing, and measurement  
Sample Size and Missing Data: sample size, events per variable, missing data  
Statistical Analysis: selection of predictors, internal validation, type of external validation done

Figure 2: CHARMS Risk of Bias Assessment

110x202mm (300 x 300 DPI)

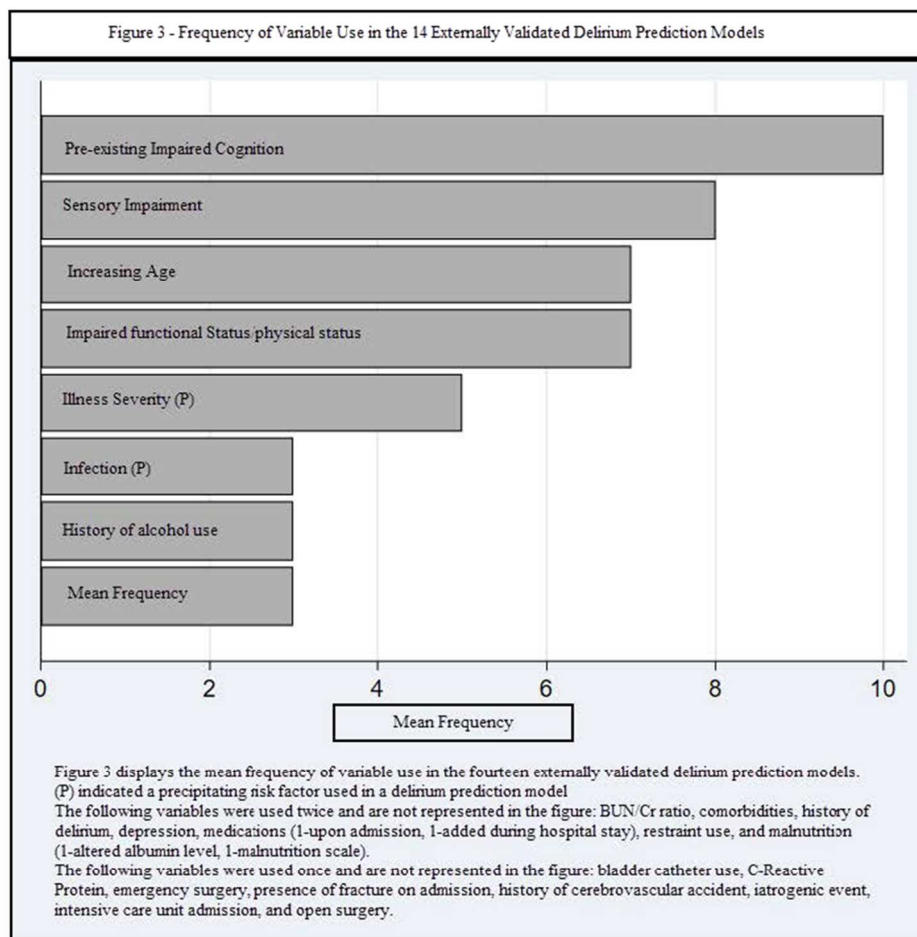

Figure 3: Frequency of Variable Use in the 14 Externally Validated Delirium Prediction Models

187x183mm (300 x 300 DPI)



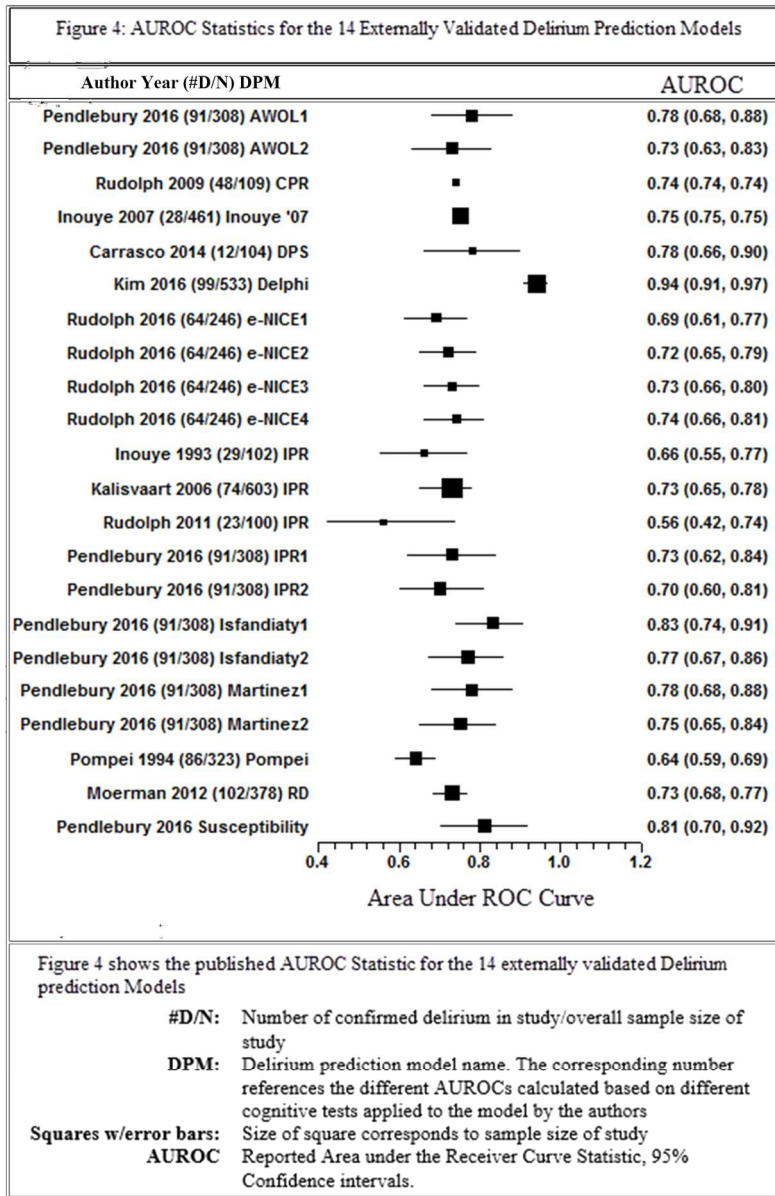

Figure 4: AUROC Statistics for the 14 Externally Validated Delirium Prediction Models

137x210mm (300 x 300 DPI)

1  
2  
3  
4  
5  
6  
7  
8  
9  
10  
11  
12  
13  
14  
15  
16  
17  
18  
19  
20  
21  
22  
23  
24  
25  
26  
27  
28  
29  
30  
31  
32  
33  
34  
35  
36  
37  
38  
39  
40  
41  
42  
43  
44  
45  
46  
47

| <b>Appendix A – Review Protocol</b> |                                                                                                                                                                                                                                                                                                                       |                                  |                                                                                            |                              |
|-------------------------------------|-----------------------------------------------------------------------------------------------------------------------------------------------------------------------------------------------------------------------------------------------------------------------------------------------------------------------|----------------------------------|--------------------------------------------------------------------------------------------|------------------------------|
| Working Title of Review             | Systematic Review of Delirium Prediction Models                                                                                                                                                                                                                                                                       |                                  | Support                                                                                    | Modifications                |
| Authors                             | 1 <sup>st</sup> & Corresponding                                                                                                                                                                                                                                                                                       | Heidi Lindroth                   | Literature search, data extraction, data synthesis and manuscript preparation.             |                              |
|                                     | Data Extraction                                                                                                                                                                                                                                                                                                       | Heidi Lindroth<br>Suzanne Purvis | Literature search, data extraction, data synthesis.                                        |                              |
|                                     | Content Experts                                                                                                                                                                                                                                                                                                       | Lisa Bratzke                     | Assisted with content related to cognition. Results review.                                |                              |
|                                     |                                                                                                                                                                                                                                                                                                                       | Roger Brown                      | Statistical content expert                                                                 |                              |
|                                     |                                                                                                                                                                                                                                                                                                                       | Mark Coburn                      | Results review, Manuscript preparation                                                     |                              |
|                                     |                                                                                                                                                                                                                                                                                                                       | Marko Mrkobrada                  | Results review, Manuscript preparation                                                     |                              |
|                                     |                                                                                                                                                                                                                                                                                                                       | Matthew TV Chan                  | Results review, Manuscript preparation                                                     |                              |
|                                     |                                                                                                                                                                                                                                                                                                                       | Daniel Davis                     | Geriatrician expertise, reviewed results, manuscript preparation.                          |                              |
|                                     |                                                                                                                                                                                                                                                                                                                       | Pratik Pandharipande             | Results review, Manuscript preparation                                                     |                              |
|                                     |                                                                                                                                                                                                                                                                                                                       | Cynthia M. Carlsson              | Geriatrician expertise, reviewed results, manuscript preparation.                          |                              |
|                                     | Mentoring                                                                                                                                                                                                                                                                                                             | Robert D. Sanders                | Mentoring author, resolved content/data disagreements b/w authors, manuscript preparation. |                              |
| Aim                                 | To identify existing prognostic delirium prediction models and evaluate their validity and statistical methodology in the older adult ( $\geq 60$ yo) acute hospital population.                                                                                                                                      |                                  |                                                                                            |                              |
| Search Terms                        | ("Delirium" OR "postoperative delirium" OR "ICU delirium" OR "ICU psychosis" OR "ICU syndrome" OR "acute confusional state" OR "acute brain dysfunction") AND ("inpatient" OR "hospital*" OR "postoperative" OR surg* OR "critical care unit" OR "intensive care unit" OR CCU OR ICU) AND ("predict*" model OR risk*) |                                  | UW-Madison Health Sciences librarian. Three meetings to refine search terms.               |                              |
| Databases searched                  | PubMed, CINAHL, PsychINFO, Cochrane, SocINDEX and Medline                                                                                                                                                                                                                                                             |                                  | Health Sciences librarian.                                                                 | Expanded to include SocINDEX |
| Timelines established               | 01/01/1990-12/31/2016                                                                                                                                                                                                                                                                                                 |                                  |                                                                                            | Originally was 12/31/15.     |

|                         |                                                                                                                                                                                                                                                                                                                                                                                                                                                                                                                                                                                                        |                  |                                                                                               |
|-------------------------|--------------------------------------------------------------------------------------------------------------------------------------------------------------------------------------------------------------------------------------------------------------------------------------------------------------------------------------------------------------------------------------------------------------------------------------------------------------------------------------------------------------------------------------------------------------------------------------------------------|------------------|-----------------------------------------------------------------------------------------------|
|                         |                                                                                                                                                                                                                                                                                                                                                                                                                                                                                                                                                                                                        |                  | Expanded to include all of 2016.                                                              |
| Inclusion criteria      | <ul style="list-style-type: none"> <li>• Age <math>\geq</math> 60</li> <li>• Inpatient population</li> <li>• Developing and/or validating a delirium prediction model</li> </ul>                                                                                                                                                                                                                                                                                                                                                                                                                       |                  | Age expanded from $\geq$ 70 years of age due to the literature                                |
| Exclusion criteria      | <ul style="list-style-type: none"> <li>• Emergency department</li> <li>• Hospice/palliative care</li> <li>• Pediatric population</li> <li>• Related to alcohol withdrawal</li> <li>• <math>\leq</math>50 sample size</li> </ul>                                                                                                                                                                                                                                                                                                                                                                        | Mentoring author | Sample size criteria added to build rigor in the studies that were included in the sys review |
| Selection process       | Studies will be selected based on the inclusion/exclusion criteria. The data extraction authors (HL and SP) will conduct the literature search independently and meet monthly to discuss findings. Any disagreements will be resolved by the mentoring author (RDS)                                                                                                                                                                                                                                                                                                                                    |                  |                                                                                               |
| Data Management         | A shared folder on the UW-Madison Box account will be created to share documents, data and meeting information.                                                                                                                                                                                                                                                                                                                                                                                                                                                                                        |                  |                                                                                               |
| Data collection process | Data will be collected independently by HL and SP then data points will be shared at monthly meetings. Data collection tables will be created using Microsoft Excel then uploaded to the shared Box account. Any disagreement between authors will be resolved by the mentoring author (RDS).                                                                                                                                                                                                                                                                                                          |                  |                                                                                               |
| Data points collected   | <ul style="list-style-type: none"> <li>• Characteristics of studies (design, population, sample size)</li> <li>• Outcome measure including how it was identified, measured, defined. Prevalence.</li> <li>• Statistical methods applied</li> <li>• Statistical information about the delirium prediction models (sensitivity, specificity, positive predictive value, negative predictive value, AUROC)</li> <li>• Characteristics of DPMs (variables used, scoring, development)</li> <li>• Cognitive measures used in studies.</li> <li>• Criteria to fulfill the Newcastle Ottawa Scale.</li> </ul> |                  |                                                                                               |
| Outcomes                | <ul style="list-style-type: none"> <li>• AUROC will be the primary outcome measure</li> <li>• Characteristics of DPMs (variables, statistics)</li> <li>• Cognitive tests used</li> </ul>                                                                                                                                                                                                                                                                                                                                                                                                               |                  |                                                                                               |

1  
2  
3  
4  
5  
6  
7  
8  
9  
10  
11  
12  
13  
14  
15  
16  
17  
18  
19  
20  
21  
22  
23  
24  
25  
26  
27  
28  
29  
30  
31  
32  
33  
34  
35  
36  
37  
38  
39  
40  
41  
42  
43  
44  
45  
46  
47

|                        |                                                                                                                                                                       |  |  |
|------------------------|-----------------------------------------------------------------------------------------------------------------------------------------------------------------------|--|--|
| Data synthesis         | The first/corresponding author (HL) will synthesize the data into the manuscript. The co-authors will verify this.<br>RB will complete the meta-analysis.             |  |  |
| Manuscript preparation | HL will complete manuscript preparation. All co-authors are responsible for reviewing content and data to assure correctness and complete synthesis of data gathered. |  |  |

For peer review only



# PRISMA 2009 Checklist

| Section/topic                      | #  | Checklist item                                                                                                                                                                                                                                                                                              | Reported on page # |
|------------------------------------|----|-------------------------------------------------------------------------------------------------------------------------------------------------------------------------------------------------------------------------------------------------------------------------------------------------------------|--------------------|
| <b>TITLE</b>                       |    |                                                                                                                                                                                                                                                                                                             |                    |
| Title                              | 1  | Identify the report as a systematic review, meta-analysis, or both.                                                                                                                                                                                                                                         | 1                  |
| <b>ABSTRACT</b>                    |    |                                                                                                                                                                                                                                                                                                             |                    |
| Structured summary                 | 2  | Provide a structured summary including, as applicable: background; objectives; data sources; study eligibility criteria, participants, and interventions; study appraisal and synthesis methods; results; limitations; conclusions and implications of key findings; systematic review registration number. | 2                  |
| <b>INTRODUCTION</b>                |    |                                                                                                                                                                                                                                                                                                             |                    |
| Rationale                          | 3  | Describe the rationale for the review in the context of what is already known.                                                                                                                                                                                                                              | 4                  |
| Objectives                         | 4  | Provide an explicit statement of questions being addressed with reference to participants, interventions, comparisons, outcomes, and study design (PICOS).                                                                                                                                                  | 4                  |
| <b>METHODS</b>                     |    |                                                                                                                                                                                                                                                                                                             |                    |
| Protocol and registration          | 5  | Indicate if a review protocol exists, if and where it can be accessed (e.g., Web address), and, if available, provide registration information including registration number.                                                                                                                               | 4                  |
| Eligibility criteria               | 6  | Specify study characteristics (e.g., PICOS, length of follow-up) and report characteristics (e.g., years considered, language, publication status) used as criteria for eligibility, giving rationale.                                                                                                      | 4-5                |
| Information sources                | 7  | Describe all information sources (e.g., databases with dates of coverage, contact with study authors to identify additional studies) in the search and date last searched.                                                                                                                                  | 5                  |
| Search                             | 8  | Present full electronic search strategy for at least one database, including any limits used, such that it could be repeated.                                                                                                                                                                               | 5                  |
| Study selection                    | 9  | State the process for selecting studies (i.e., screening, eligibility, included in systematic review, and, if applicable, included in the meta-analysis).                                                                                                                                                   | 5                  |
| Data collection process            | 10 | Describe method of data extraction from reports (e.g., piloted forms, independently, in duplicate) and any processes for obtaining and confirming data from investigators.                                                                                                                                  | 5-6                |
| Data items                         | 11 | List and define all variables for which data were sought (e.g., PICOS, funding sources) and any assumptions and simplifications made.                                                                                                                                                                       | 6                  |
| Risk of bias in individual studies | 12 | Describe methods used for assessing risk of bias of individual studies (including specification of whether this was done at the study or outcome level), and how this information is to be used in any data synthesis.                                                                                      | 6-7                |
| Summary measures                   | 13 | State the principal summary measures (e.g., risk ratio, difference in means).                                                                                                                                                                                                                               | 6                  |
| Synthesis of results               | 14 | Describe the methods of handling data and combining results of studies, if done, including measures of consistency (e.g., $I^2$ ) for each meta-analysis.                                                                                                                                                   | 6                  |





# PRISMA 2009 Checklist

| Section/topic                 | #  | Checklist item                                                                                                                                                                                           | Reported on page #          |
|-------------------------------|----|----------------------------------------------------------------------------------------------------------------------------------------------------------------------------------------------------------|-----------------------------|
| Risk of bias across studies   | 15 | Specify any assessment of risk of bias that may affect the cumulative evidence (e.g., publication bias, selective reporting within studies).                                                             | 6                           |
| Additional analyses           | 16 | Describe methods of additional analyses (e.g., sensitivity or subgroup analyses, meta-regression), if done, indicating which were pre-specified.                                                         | 6                           |
| <b>RESULTS</b>                |    |                                                                                                                                                                                                          |                             |
| Study selection               | 17 | Give numbers of studies screened, assessed for eligibility, and included in the review, with reasons for exclusions at each stage, ideally with a flow diagram.                                          | 7                           |
| Study characteristics         | 18 | For each study, present characteristics for which data were extracted (e.g., study size, PICOS, follow-up period) and provide the citations.                                                             | 7                           |
| Risk of bias within studies   | 19 | Present data on risk of bias of each study and, if available, any outcome level assessment (see item 12).                                                                                                | 7-8<br>Table 1,<br>Figure 2 |
| Results of individual studies | 20 | For all outcomes considered (benefits or harms), present, for each study: (a) simple summary data for each intervention group (b) effect estimates and confidence intervals, ideally with a forest plot. | Table 1, 2<br>Figure 4      |
| Synthesis of results          | 21 | Present results of each meta-analysis done, including confidence intervals and measures of consistency.                                                                                                  | N/A                         |
| Risk of bias across studies   | 22 | Present results of any assessment of risk of bias across studies (see Item 15).                                                                                                                          | Table 1,<br>Figure 2        |
| Additional analysis           | 23 | Give results of additional analyses, if done (e.g., sensitivity or subgroup analyses, meta-regression [see Item 16]).                                                                                    | 8-19                        |
| <b>DISCUSSION</b>             |    |                                                                                                                                                                                                          |                             |
| Summary of evidence           | 24 | Summarize the main findings including the strength of evidence for each main outcome; consider their relevance to key groups (e.g., healthcare providers, users, and policy makers).                     | 19-20                       |
| Limitations                   | 25 | Discuss limitations at study and outcome level (e.g., risk of bias), and at review-level (e.g., incomplete retrieval of identified research, reporting bias).                                            | 19-24                       |
| Conclusions                   | 26 | Provide a general interpretation of the results in the context of other evidence, and implications for future research.                                                                                  | 19-26                       |
| <b>FUNDING</b>                |    |                                                                                                                                                                                                          |                             |
| Funding                       | 27 | Describe sources of funding for the systematic review and other support (e.g., supply of data); role of funders for the systematic review.                                                               | 6                           |

From: Moher D, Liberati A, Tetzlaff J, Altman DG, The PRISMA Group (2009). Preferred Reporting Items for Systematic Reviews and Meta-Analyses: The PRISMA Statement. PLoS Med 6(7): e1000097. doi:10.1371/journal.pmed1000097

For peer review only - <http://bmjopen.bmj.com/site/about/guidelines.xhtml>  
For more information, visit: [www.prisma-statement.org](http://www.prisma-statement.org).

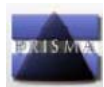

# PRISMA 2009 Checklist

For peer review only

- 1
- 2
- 3
- 4
- 5
- 6
- 7
- 8
- 9
- 10
- 11
- 12
- 13
- 14
- 15
- 16
- 17
- 18
- 19
- 20
- 21
- 22
- 23
- 24
- 25
- 26
- 27
- 28
- 29
- 30
- 31
- 32
- 33
- 34
- 35
- 36
- 37
- 38
- 39
- 40
- 41
- 42
- 43
- 44
- 45
- 46
- 47
