# Supplementary material for: Systematic review of prediction models for delirium in the older adult inpatient
Source: PubMed Central journal article supplement — BMJ Open. 2018 Apr 28;8(4):e019223. doi: 10.1136/bmjopen-2017-019223 (PMC5931306; doi:10.1136/bmjopen-2017-019223), 2018-04-28
Supplement: bmjopen-2017-019223supp001.pdf [file bmjopen-2017-019223supp001.pdf]

| <b>Appendix A – Review Protocol</b> |                                                                                                                                                                                                                                                                                                                       |                                  |                                                                                            |                              |
|-------------------------------------|-----------------------------------------------------------------------------------------------------------------------------------------------------------------------------------------------------------------------------------------------------------------------------------------------------------------------|----------------------------------|--------------------------------------------------------------------------------------------|------------------------------|
| Working Title of Review             | Systematic Review of Delirium Prediction Models                                                                                                                                                                                                                                                                       |                                  | Support                                                                                    | Modifications                |
| Authors                             | 1 <sup>st</sup> & Corresponding                                                                                                                                                                                                                                                                                       | Heidi Lindroth                   | Literature search, data extraction, data synthesis and manuscript preparation.             |                              |
|                                     | Data Extraction                                                                                                                                                                                                                                                                                                       | Heidi Lindroth<br>Suzanne Purvis | Literature search, data extraction, data synthesis.                                        |                              |
|                                     | Content Experts                                                                                                                                                                                                                                                                                                       | Lisa Bratzke                     | Assisted with content related to cognition. Results review.                                |                              |
|                                     |                                                                                                                                                                                                                                                                                                                       | Roger Brown                      | Statistical content expert                                                                 |                              |
|                                     |                                                                                                                                                                                                                                                                                                                       | Mark Coburn                      | Results review, Manuscript preparation                                                     |                              |
|                                     |                                                                                                                                                                                                                                                                                                                       | Marko Mrkobrada                  | Results review, Manuscript preparation                                                     |                              |
|                                     |                                                                                                                                                                                                                                                                                                                       | Matthew TV Chan                  | Results review, Manuscript preparation                                                     |                              |
|                                     |                                                                                                                                                                                                                                                                                                                       | Daniel Davis                     | Geriatrician expertise, reviewed results, manuscript preparation.                          |                              |
|                                     |                                                                                                                                                                                                                                                                                                                       | Pratik Pandharipande             | Results review, Manuscript preparation                                                     |                              |
|                                     |                                                                                                                                                                                                                                                                                                                       | Cynthia M. Carlsson              | Geriatrician expertise, reviewed results, manuscript preparation.                          |                              |
|                                     | Mentoring                                                                                                                                                                                                                                                                                                             | Robert D. Sanders                | Mentoring author, resolved content/data disagreements b/w authors, manuscript preparation. |                              |
| Aim                                 | To identify existing prognostic delirium prediction models and evaluate their validity and statistical methodology in the older adult ( $\geq 60$ yo) acute hospital population.                                                                                                                                      |                                  |                                                                                            |                              |
| Search Terms                        | (“Delirium” OR “postoperative delirium” OR “ICU delirium” OR “ICU psychosis” OR “ICU syndrome” OR “acute confusional state” OR “acute brain dysfunction”) AND (“inpatient” OR “hospital*” OR “postoperative” OR surg* OR “critical care unit” OR “intensive care unit” OR CCU OR ICU) AND (“predict*” model OR risk*) |                                  | UW-Madison Health Sciences librarian. Three meetings to refine search terms.               |                              |
| Databases searched                  | PubMed, CINAHL, PsychINFO, Cochrane, SocINDEX and Medline                                                                                                                                                                                                                                                             |                                  | Health Sciences librarian.                                                                 | Expanded to include SocINDEX |
| Timelines established               | 01/01/1990-12/31/2016                                                                                                                                                                                                                                                                                                 |                                  |                                                                                            | Originally was 12/31/15.     |

|                         |                                                                                                                                                                                                                                                                                                                                                                                                                                                                                                                                                                                                        |                  |                                                                                               |
|-------------------------|--------------------------------------------------------------------------------------------------------------------------------------------------------------------------------------------------------------------------------------------------------------------------------------------------------------------------------------------------------------------------------------------------------------------------------------------------------------------------------------------------------------------------------------------------------------------------------------------------------|------------------|-----------------------------------------------------------------------------------------------|
|                         |                                                                                                                                                                                                                                                                                                                                                                                                                                                                                                                                                                                                        |                  | Expanded to include all of 2016.                                                              |
| Inclusion criteria      | <ul style="list-style-type: none"> <li>• Age <math>\geq</math> 60</li> <li>• Inpatient population</li> <li>• Developing and/or validating a delirium prediction model</li> </ul>                                                                                                                                                                                                                                                                                                                                                                                                                       |                  | Age expanded from $\geq$ 70 years of age due to the literature                                |
| Exclusion criteria      | <ul style="list-style-type: none"> <li>• Emergency department</li> <li>• Hospice/palliative care</li> <li>• Pediatric population</li> <li>• Related to alcohol withdrawal</li> <li>• <math>\leq</math>50 sample size</li> </ul>                                                                                                                                                                                                                                                                                                                                                                        | Mentoring author | Sample size criteria added to build rigor in the studies that were included in the sys review |
| Selection process       | Studies will be selected based on the inclusion/exclusion criteria. The data extraction authors (HL and SP) will conduct the literature search independently and meet monthly to discuss findings. Any disagreements will be resolved by the mentoring author (RDS)                                                                                                                                                                                                                                                                                                                                    |                  |                                                                                               |
| Data Management         | A shared folder on the UW-Madison Box account will be created to share documents, data and meeting information.                                                                                                                                                                                                                                                                                                                                                                                                                                                                                        |                  |                                                                                               |
| Data collection process | Data will be collected independently by HL and SP then data points will be shared at monthly meetings. Data collection tables will be created using Microsoft Excel then uploaded to the shared Box account. Any disagreement between authors will be resolved by the mentoring author (RDS).                                                                                                                                                                                                                                                                                                          |                  |                                                                                               |
| Data points collected   | <ul style="list-style-type: none"> <li>• Characteristics of studies (design, population, sample size)</li> <li>• Outcome measure including how it was identified, measured, defined. Prevalence.</li> <li>• Statistical methods applied</li> <li>• Statistical information about the delirium prediction models (sensitivity, specificity, positive predictive value, negative predictive value, AUROC)</li> <li>• Characteristics of DPMs (variables used, scoring, development)</li> <li>• Cognitive measures used in studies.</li> <li>• Criteria to fulfill the Newcastle Ottawa Scale.</li> </ul> |                  |                                                                                               |
| Outcomes                | <ul style="list-style-type: none"> <li>• AUROC will be the primary outcome measure</li> <li>• Characteristics of DPMs (variables, statistics)</li> <li>• Cognitive tests used</li> </ul>                                                                                                                                                                                                                                                                                                                                                                                                               |                  |                                                                                               |

|                        |                                                                                                                                                                       |  |  |
|------------------------|-----------------------------------------------------------------------------------------------------------------------------------------------------------------------|--|--|
| Data synthesis         | The first/corresponding author (HL) will synthesize the data into the manuscript. The co-authors will verify this.<br>RB will complete the meta-analysis.             |  |  |
| Manuscript preparation | HL will complete manuscript preparation. All co-authors are responsible for reviewing content and data to assure correctness and complete synthesis of data gathered. |  |  |
